# Supplementary material
Source: PubMed Central journal article supplement (PMC2816020)

## **Supplemental data**

### **Supplemental Table 1**

Alphabetical list of all tri-deuteroacetylated, internal peptides that were only present in the digested proteome of mouse caspase-3- and/or mouse caspase-7-treated mouse Mf4/4 lysates. Sequence, number of identified spectra (spectra no.), m/z, z, error (Da), threshold, highest Mascot ion score,  $\Delta$  threshold and e value of the identified spectra with highest Mascot ion score are given.

### **Supplemental Table 2**

#### **List of unique caspase-7 and -3 processing events identified in recombinant caspase-7- or -3-treated macrophage lysates**

The parent proteins are referred to by description (protein name), abbreviation (Abbr.), UniProt database accession number (accession No.), subcellular localization (subcell. local.) and molecular weight ( $M_r$  protein). Furthermore, the P6-P5' amino acids (cleavage site), the identified peptide, the molecular weight of the N- and C-terminal fragments generated upon cleavage of the parent protein ( $M_r$  fragments), the percentage of homology of the parent protein with its human ortholog, and the preservation of the cleavage site in the human ortholog are indicated. For known substrates, the reference is given, and newly identified cleavage sites are indicated as "new". More detailed information on the human orthologous cleavage sites can be found in Supplemental Table 4.

### **Supplemental Table 3**

### **List of all the neo-N-termini identified in the digested proteome of caspase-7 and -3**

Peptides are classified according to the efficiency of their cleavage by caspase-7 compared to caspase-3, which is projected in the first column (statistically corrected C7/C3 ratio). The parent proteins are referred to by protein name and UniProt database accession number (Accession No.). Cleavage site, identified peptides and relevant references (for known caspase substrates) are indicated. Newly identified cleavage sites are indicated as “new.”

### **Supplemental Table 4**

#### **List of the 55 identified mouse caspase-7 and -3 cleavage sites and their corresponding cleavage sites in the human substrate orthologs**

Protein substrates (abbreviated protein name) are listed alphabetically. UniProt entry name, cleavage sites (P1 residue is numbered) and the references for known substrates are given. Newly identified cleavage sites are indicated as “new.” Orthologous sites were extracted after performing a pairwise global alignment using the amino acid sequence of the identified substrates (Needleman-Wunsch; gap opening: 10.0, gap extension: 0.5, Blosum: 62 matrix).

**Supplemental Table 1**

| Sequence                                            | Spectra no. | m/z       | z | Error (Da) | Threshold | Score of highest scoring spectra | $\Delta$ threshold | e value |
|-----------------------------------------------------|-------------|-----------|---|------------|-----------|----------------------------------|--------------------|---------|
| AcD3-AAEDYAKER                                      | 2           | 574.7883  | 2 | -0.0767    | 30        | 69                               | 39                 | 0.00001 |
| AcD3-AAGVASLLTTAEAVVTEIPKEEKDPGM<br>GAMGGMGGGMGGGMF | 1           | 1050.2289 | 4 | -0.0415    | 20        | 26                               | 6                  | 0.01258 |
| AcD3-AAVADPDEFER                                    | 1           | 632.774   | 2 | -0.0476    | 31        | 32                               | 1                  | 0.03973 |
| AcD3-AAVPTNIIAAKAAEV                                | 1           | 842.903   | 2 | -0.1875    | 31        | 47                               | 16                 | 0.00126 |
| AcD3-AEAAMDISEGR                                    | 4           | 608.815   | 2 | -0.0085    | 30        | 107                              | 77                 | 0.00000 |
| AcD3-AGMAMAGQSPVLR                                  | 3           | 683.3322  | 2 | -0.0121    | 30        | 57                               | 27                 | 0.00010 |
| AcD3-AKAEEEFNIEKGR                                  | 3           | 831.4399  | 2 | -0.0725    | 30        | 99                               | 69                 | 0.00000 |
| AcD3-AMVKSVER                                       | 2           | 516.2888  | 2 | -0.0728    | 31        | 58                               | 27                 | 0.00010 |
| AcD3-ASSAVKVKR                                      | 3           | 543.8462  | 2 | -0.0735    | 30        | 71                               | 41                 | 0.00000 |
| AcD3-AVTEGAMPAATGKDQPPSTGKKR                        | 1           | 889.932   | 3 | 0.3576     | 36        | 41                               | 5                  | 0.01583 |
| AcD3-CLPGLAKQPSFR                                   | 5           | 735.4077  | 2 | -0.073     | 30        | 52                               | 22                 | 0.00032 |
| AcD3-EDLENQTLR                                      | 1           | 582.7749  | 2 | -0.0033    | 31        | 70                               | 39                 | 0.00001 |
| AcD3-FAVEYFTR                                       | 2           | 542.2842  | 2 | -0.0697    | 30        | 57                               | 27                 | 0.00010 |
| AcD3-FLEGDQKVER                                     | 1           | 704.444   | 2 | 0.1422     | 31        | 49                               | 18                 | 0.00080 |
| AcD3-FPLSPPKKDLSELEIQKLEAAEER                       | 2           | 1100.6226 | 3 | -0.0871    | 29        | 39                               | 10                 | 0.00501 |
| AcD3-FSLADAINTEFKNTR                                | 2           | 908.9656  | 2 | -0.0107    | 30        | 89                               | 59                 | 0.00000 |
| AcD3-FSQLLNCFVPR                                    | 3           | 826.4189  | 2 | -0.0035    | 32        | 68                               | 36                 | 0.00001 |
| AcD3-GADCIMLSGETAKGDYPLEAVR                         | 2           | 820.3886  | 3 | -0.0186    | 30        | 71                               | 41                 | 0.00000 |
| AcD3-GEALSTLVLR                                     | 4           | 612.3579  | 2 | -0.0707    | 30        | 62                               | 32                 | 0.00003 |
| AcD3-GEEQAEKTKGKR                                   | 2           | 770.881   | 2 | -0.0808    | 31        | 52                               | 21                 | 0.00040 |
| AcD3-GGDGQAGPDEGEVDSCLR                             | 3           | 935.4052  | 2 | -0.0686    | 27        | 97                               | 70                 | 0.00000 |
| AcD3-GIVPDIAGTKR                                    | 1           | 658.358   | 2 | -0.0763    | 31        | 51                               | 20                 | 0.00050 |
| AcD3-GKGVVVVMKR                                     | 2           | 612.351   | 2 | -0.0543    | 30        | 55                               | 25                 | 0.00016 |
| AcD3-GKPSASPOER                                     | 1           | 573.8047  | 2 | 1E-04      | 31        | 40                               | 9                  | 0.00631 |
| AcD3-GKTEQKGGDKKR                                   | 1           | 778.968   | 2 | 0.0428     | 34        | 69                               | 35                 | 0.00002 |
| AcD3-GKTLNDELEIIEGMKFDR                             | 1           | 755.7221  | 3 | -0.087     | 30        | 50                               | 20                 | 0.00050 |
| AcD3-GKVESIMKR                                      | 4           | 599.875   | 2 | 0.0617     | 30        | 63                               | 33                 | 0.00003 |
| AcD3-GKVTYGQKR                                      | 1           | 586.338   | 2 | -0.0093    | 30        | 44                               | 14                 | 0.00200 |
| AcD3-GKYSQVLANGLDNKLR                               | 1           | 956.019   | 2 | -0.0337    | 31        | 55                               | 24                 | 0.00020 |
| AcD3-GLAVTPTVPVVGSMQTR                              | 5           | 935.941   | 2 | -0.1387    | 30        | 53                               | 23                 | 0.00025 |
| AcD3-GLLSQGYSDFINR                                  | 1           | 760.866   | 2 | -0.1295    | 31        | 39                               | 8                  | 0.00794 |
| AcD3-GLNASQIR                                       | 1           | 455.2632  | 2 | -0.076     | 31        | 54                               | 23                 | 0.00025 |
| AcD3-GPEQMELEEGKAGSGLR                              | 1           | 947.4578  | 2 | -0.0046    | 31        | 77                               | 46                 | 0.00000 |
| AcD3-GQPGAFTCYLDAGLAR                               | 3           | 871.426   | 2 | 0.0042     | 31        | 93                               | 62                 | 0.00000 |
| AcD3-GQVITIGNER                                     | 6           | 569.8129  | 2 | -0.0716    | 31        | 74                               | 43                 | 0.00000 |
| AcD3-GTVEEDLGKSR                                    | 6           | 643.8311  | 2 | -0.0915    | 30        | 62                               | 32                 | 0.00003 |
| AcD3-GVMNGEYYQESNGPTDSYAAISEVDR                     | 4           | 972.0705  | 3 | -0.0428    | 23        | 98                               | 75                 | 0.00000 |
| AcD3-IAVPKFKQR                                      | 1           | 611.392   | 2 | 0.0103     | 34        | 49                               | 15                 | 0.00159 |
| AcD3-LFAIAKDSQKKTQR                                 | 5           | 907.525   | 2 | -0.0133    | 31        | 70                               | 39                 | 0.00001 |
| AcD3-LGGAVSLGDPDLLPAASESR                           | 1           | 987.5508  | 2 | -0.0761    | 31        | 59                               | 28                 | 0.00008 |
| AcD3-MVNDGVEDLR                                     | 1           | 607.884   | 2 | 0.1087     | 31        | 54                               | 23                 | 0.00025 |

**Supplemental Table 1 (continued)**

| Sequence                          | Spectra no. | m/z      | z | Error (Da) | Threshold | Score of highest scoring spectra | $\Delta$ threshold | e value |
|-----------------------------------|-------------|----------|---|------------|-----------|----------------------------------|--------------------|---------|
| AcD3-NGSGMCKAGFAGDDAPR            | 5           | 912.3651 | 2 | -0.1335    | 25        | 91                               | 66                 | 0.00000 |
| AcD3-NTEEKKSGLSVR                 | 1           | 741.888  | 2 | -0.0421    | 31        | 67                               | 36                 | 0.00001 |
| AcD3-SFLAAAETLKER                 | 1           | 716.45   | 2 | 0.0208     | 31        | 46                               | 15                 | 0.00159 |
| AcD3-SGPPAKKIR                    | 2           | 547.8477 | 2 | -0.0756    | 30        | 71                               | 41                 | 0.00000 |
| AcD3-SGQGPPAEIIIEGEEAAKEEAEAOQVRR | 1           | 1455.012 | 2 | -0.3629    | 31        | 43                               | 12                 | 0.00316 |
| AcD3-SLKEALTYDGALLGDR             | 3           | 906.418  | 2 | -0.1369    | 31        | 67                               | 36                 | 0.00001 |
| AcD3-SLVCKAGIIASAR                | 1           | 721.433  | 2 | -0.0486    | 31        | 39                               | 8                  | 0.00794 |
| AcD3-SQGPTPVCTPTFLER              | 1           | 867.945  | 2 | 0.0268     | 31        | 32                               | 1                  | 0.03973 |
| AcD3-SSPDSKPKTR                   | 1           | 619.3387 | 2 | -0.0032    | 31        | 32                               | 1                  | 0.03973 |
| AcD3-STAAQQELR                    | 3           | 524.7723 | 2 | -0.0088    | 31        | 65                               | 34                 | 0.00002 |
| AcD3-STLAVQQYIQQNIR               | 2           | 856.912  | 2 | -0.1961    | 31        | 60                               | 29                 | 0.00006 |
| AcD3-TPAKNAQKSNQNGKDLKPSTPR       | 1           | 869.4599 | 3 | -0.0349    | 30        | 69                               | 39                 | 0.00001 |
| AcD3-VDGTVVEEDLGKSR               | 2           | 750.771  | 2 | -0.3071    | 31        | 45                               | 14                 | 0.00200 |
| AcD3-YAKGFGGOYGIQKDR              | 1           | 911.911  | 2 | -0.1285    | 31        | 85                               | 54                 | 0.00000 |

Supplemental Table 2

Caspase-7

| Protein name                                          | Abbr.   | Accession Nr. | Subcell. Local.     | Mr protein (kDa) | Cleavage site                | Identified peptide       | Mr fragments (kDa) | Protein homology with human orthologue | Cleavage site preserved in human orthologue | Status |
|-------------------------------------------------------|---------|---------------|---------------------|------------------|------------------------------|--------------------------|--------------------|----------------------------------------|---------------------------------------------|--------|
| 40S ribosomal protein S18                             | Rps18   | P62270        | Cytoplasm           | 18               | QKDVKD <sub>92</sub> GKYSQ   | GKYSQVLANGLDNKILR        | 11-7               | 100%                                   | Yes                                         | New    |
| 60S ribosomal protein L28                             | Rpl28   | P41105        | Cytoplasm           | 16               | VEPAAD <sub>56</sub> GKGVV   | GKGVVVVMKR               | 9-7                | 98%                                    | Yes                                         | New    |
| MKI67 FHA domain-interacting nucleolar phosphoprotein | Mki67ip | O91VE6        | Nucleus Nucleolus   | 36               | KKSSVD <sub>252</sub> SQGPT  | SQGPTPVCTPTFLER          | 29-7               | 61%                                    | No*                                         | New    |
| Nucleophosmin                                         | Npm1    | O61937        | Nucleus Nucleolus   | 33               | KKSVRD <sub>197</sub> TPAKN  | TPAKNAQKSNQNGKDLKPSTPR   | 22-11              | 94%                                    | No*                                         | (1)    |
| Probable rRNA-processing protein EBP2                 | Ebp2    | O9D903        | Nucleus Nucleolus   | 35               | FSDKLD <sub>211</sub> FLEGD  | FLEGDQKPYER              | 24-11              | 83%                                    | Yes                                         | New    |
| Myb-binding protein 1A                                | Mybbp1a | O7TPV4        | Nucleolus Cytoplasm | 152              | AASQQD <sub>1201</sub> AVTEG | AVTEGAMPAATGKDQPPSTGKKKR | 137-15             | 69%                                    | No*                                         | New    |

Caspase-3

| Protein name                                                       | Abbr.  | Accession Nr. | Subcell. Local. | Mr protein (kDa) | Cleavage site                | Identified peptide           | Mr fragments (kDa) | Protein homology with human orthologue | Cleavage site preserved in human orthologue | Status |
|--------------------------------------------------------------------|--------|---------------|-----------------|------------------|------------------------------|------------------------------|--------------------|----------------------------------------|---------------------------------------------|--------|
| Hepatoma-derived growth factor                                     | Hdgf   | P51859        | Cytoplasm       | 26               | TPSEPDP <sub>205</sub> SGQGP | SGQGPAAEEEEEGEEFAAKKEEAQGVYR | 16-10              | 89%                                    | No*                                         | New    |
| Nuclear ubiquitinous casein and cyclin-dependent kinases substrate | Nucks1 | O80XU3        | Nucleus         | 26               | EDYGRD <sub>25</sub> SGPPA   | SGPPAKKIR                    | 23-3               | 95%                                    | Yes                                         | (2, 3) |
| Glutathione S-transferase P1                                       | Gslp1  | P19157        | Cytoplasm       | 24               | EAQMD <sub>91</sub> MVNDG    | MVNDGVEDLR                   | 11-13              | 85%                                    | No*                                         | New    |

### Supplemental Table 3

| C7/C3 ratio | Protein name                                                   | Abbr.    | Accession Nr. | Cleavage site                | Identified peptide                              | Status         |
|-------------|----------------------------------------------------------------|----------|---------------|------------------------------|-------------------------------------------------|----------------|
| 4.5/1       | Coiled-coil domain-containing protein 137                      | CCDC137  | Q8R0K4        | KGEEPD <sub>108</sub> IAVPK  | IAVPKFKQR                                       | New            |
| 4.0/1       | Kinesin-associated protein 3                                   | Kifap3   | P70188        | KKKAVD <sub>249</sub> EDLEN  | EDLENQTLR                                       | New            |
| 3.8/1       | WW domain-binding protein 11                                   | Wbp11    | Q923D5        | EDSERD <sub>297</sub> NTEEK  | NTEEKKSGLSVR                                    | New            |
| 3.2/1       | Short isoform of heterogeneous nuclear ribonucleoprotein U     | Hnrnpu   | O88568        | QQAGGD <sub>206</sub> GKTEQ  | GKTEQKGGDKKR                                    | (4)            |
| 2.7/1       | Heat shock protein 60                                          | Hsp60    | P63038        | RTALLD <sub>531</sub> AAGVA  | AAGVASLLTTAEAVVTEIPKEEKD<br>PGMGAMGGMGGGGMGGGMF | (2, 3, 5)      |
| 1.9/1       | 60S ribosomal protein L5                                       | Rpl5     | P47962        | NVESID <sub>135</sub> GQPGA  | GQPGAFTCYLDAGLAR                                | New            |
| 1.9/1       | Vacuolar ATP synthase subunit H                                | VATH     | Q8BVE3        | IRGAVD <sub>11</sub> AAVPT   | AAVPTNI IAAKAAEVR                               | New            |
| 1.9/1       | Hypothetical RNA-binding protein Lupus Lal                     | Larp1    | Q6ZQ58        | DYSQTD <sub>472</sub> FSQLL  | FSQLLNCPEFVPR                                   | New            |
| 1.6/1       | Serine/arginine repetitive matrix protein 2                    | Srrm2    | Q8BTI8        | ERSESD <sub>1516</sub> SSPDS | SSPDSKPKTR                                      | New            |
| 1.2/1       | Pyruvate kinase isozymes M1/M2                                 | Pkm2     | P52480        | ANAVLD <sub>354</sub> GADCI  | GADCI MLSGETAKGDYPLEAVR                         | New            |
| 1.2/1       | ATP-dependent RNA helicase DDX1                                | Ddx1     | Q91VR5        | PVDEFD <sub>685</sub> GKVTY  | GKVTYGQKR                                       | (2)            |
| 1.2/1       | Cytosolic phospholipase A2                                     | cPLA2    | P47713        | FDDEL <sub>521</sub> AAVAD   | AAVADPDEFER                                     | (4-8)          |
| 1.1/1       | Craniofacial development protein 1                             | Cfdp1    | O88271        | KEDEVD <sub>40</sub> GEEQA   | GEEQA EKTGKGR                                   | New            |
| 1.1/1       | Clathrin light chain A                                         | CltA     | O08585        | GPDAVD <sub>75</sub> GVMNG   | GVMNGEYYQESNGPTDSYAAISEVDR                      | New            |
| 1/1.1       | 26S protease regulatory subunit 8                              | PRS8     | P62196        | xxMALD <sub>4</sub> GPEQM    | GPEQMELEEGKAGSGLR                               | New            |
| 1/1.1       | Actin, aortic smooth muscle                                    | Acta2    | P62737        | SYELPD <sub>246</sub> GQVIT  | GQVITIGNER                                      | (5, 9, 10)     |
| 1/1.1       | Protein FAM21                                                  | Fam21    | Q6PGL7        | DDDEVD <sub>668</sub> LFAIA  | LFAIAKDSQKKTQR                                  | New            |
| 1/1.1       | Polypyrimidine tract-binding protein 1                         | Ptbp1    | P17225        | xxxMD <sub>2</sub> GIVPD     | GIVPDIAVGTQR                                    | (2, 11)        |
| 1/1.2       | TAR DNA-binding protein 43                                     | Tardbp   | Q921F2        | KMDET <sub>89</sub> ASSAV    | ASSAVKVKR                                       | (2, 4)         |
| 1/1.3       | Splicing factor U2AF 65 kDa subunit                            | U2af2    | P26369        | PTMTPD <sub>128</sub> GLAVT  | GLAVTPTVPVVGSMQTR                               | (2, 4)         |
| 1/1.3       | Serine/arginine repetitive matrix protein 2                    | Srrm2    | Q8BTI8        | SSQELD <sub>1502</sub> GKPSA | GKPSASPQER                                      | New            |
| 1/1.6       | Heat shock protein 60                                          | Hsp60    | P63038        | VITVKD <sub>203</sub> GKTLN  | GKTLNDELEIEGMKFDR                               | (2, 3, 5)      |
| 1/2.1       | Polypyrimidine tract-binding protein 1                         | Ptbp1    | P17225        | SAAAVD <sub>171</sub> AGMAM  | AGMAMAGQSPVLR                                   | (2, 3, 11)     |
| 1/2.2       | Vimentin                                                       | Vim      | P20152        | LQDSVD <sub>85</sub> FSLAD   | FSLADAINTEFKNTR                                 | (2-4)          |
| 1/2.6       | Protein FAM136A                                                | Fam136a  | Q9CR98        | VQEAVD <sub>14</sub> AMVKS   | AMVKSVER                                        | New            |
| 1/2.7       | Myosin-9                                                       | Myh9     | Q8VDD5        | LED <sub>1153</sub> STAAQ    | STAAQQELR                                       | (2, 4, 12, 13) |
| 1/2.7       | Lysosomal protective protein                                   | Ppqb     | P16675        | DQDEID <sub>31</sub> CLPGL   | CLPGLAKQPSFR                                    | New            |
| 1/2.8       | Vacuolar ATP synthase subunit E 1                              | Atp6v1e1 | P50518        | KAEEID <sub>31</sub> AKAEE   | AKAEEEFNIEKGR                                   | New            |
| 1/2.9       | Eukaryotic translation initiation factor 4H                    | Eif4h    | Q9WUK2        | EFDEVD <sub>92</sub> SLKEA   | SLKEALTYD GALLGDR                               | (2, 3, 5)      |
| 1/2.9       | Vacuolar ATP synthase catalytic subunit A                      | Atp6v1a  | P50516        | LTMEVD <sub>299</sub> GKVES  | GKVESIMKR                                       | New            |
| 1/3.3       | Aspartyl-tRNA synthetase, cytoplasmic                          | Dars     | Q922B2        | PREIVD <sub>19</sub> AAEDY   | AAEDYAKER                                       | New            |
| 1/3.1       | Phosphoribosyl pyrophosphate synthetase-associated protein 2   | Prpsap2  | Q8R574        | IIDDVD <sub>276</sub> SFLAA  | SFLAAEATLKER                                    | New            |
| 1/3.7       | HS1 binding protein 3                                          | Hs1bp3   | Q3TC93        | LFDDPD <sub>274</sub> LGGAV  | LGGAVSLGDP LLLLPAASESR                          | New            |
| 1/4.0       | Actin-related protein 2/3 complex subunit 5                    | Arcp5    | Q9CPW4        | FVDEED <sub>29</sub> GGDQ    | GGDQAGPDEGEVDSCLR                               | New            |
| 1/4.8       | Hematopoietic lineage cell-specific protein                    | Hcls1    | P49710        | HESQRD <sub>189</sub> YAKGF  | YAKGFGGQYGIQKDR                                 | (2)            |
| 1/4.8       | Actin, cytoplasmic 1                                           | Actb     | P60710        | AALVVD <sub>11</sub> NGSGM   | NGSGMCKAGFAGDDAPR                               | (5, 9, 10)     |
| 1/5.0       | Endoplasmic                                                    | Hsp90b1  | P08113        | DEVVD <sub>28</sub> GTVEE    | GTVEEDLGKSR                                     | (2, 4)         |
| 1/5.6       | Heat shock protein 60                                          | Hsp60    | P63038        | IAEDVD <sub>279</sub> GEALS  | GEALSTLV LNR                                    | (2, 3, 5)      |
| 1/5.6       | Preimplantation protein 3                                      | Mobk13   | Q6PEB6        | SFDEMD <sub>34</sub> STLAV   | STLAVQQYIQQNIR                                  | New            |
| 1/5.9       | cAMP-dependent protein kinase type II-alpha regulatory subunit | Prkar2a  | P12367        | PPDLVD <sub>30</sub> FAVEY   | FAVEYFTR                                        | New            |
| 1/6.3       | Stathmin                                                       | Stmn1    | P54227        | KESVPD <sub>34</sub> FPLSP   | FPLSPPKKKDLSLEEI QKKLEAEBER                     | New            |
| 1/6.7       | Endoplasmic                                                    | Hsp90b1  | P08113        | EAIQLD <sub>59</sub> GLNAS   | GLNASQIR                                        | (2)            |
| 1/7.7       | ATP-dependent RNA helicase DDX1                                | Ddx1     | Q91VR5        | VLDEAD <sub>373</sub> GLLSQ  | GLLSQGYSDFINR                                   | (2)            |
| 1/9.1       | Ubiquitin carboxyl-terminal hydrolase 5                        | Usp5     | P56399        | HIDDL <sub>767</sub> AEAAM   | AEAAMDI SEGR                                    | New            |
| 1/11.1      | Endoplasmic                                                    | Hsp90b1  | P08113        | ADDEVD <sub>26</sub> VDGTV   | VDGTVEEDLGKSR                                   | (2, 4, 5)      |
| 1/12.5      | Elongation factor 2                                            | Eef2     | P58252        | KSTLTD <sub>37</sub> SLVCK   | SLVCKAGI IASAR                                  | New            |

**Supplemental Table 4**

| Protein  | Uniprot ID   | Cleavage site                         | P1 | Status |
|----------|--------------|---------------------------------------|----|--------|
| Acta2    | ACTA_MOUSE   | SLEKSYELPD <sub>246</sub> GQVITIGNER  | D  | (5)    |
|          | ACTA_HUMAN   | SLEKSYELPD <sub>246</sub> GQVITIGNER  | D  |        |
| Actb     | ACTB_MOUSE   | DDDIAALVVD <sub>11</sub> NGSGMCKAGF   | D  | (5)    |
|          | ACTB_HUMAN   | DDDIAALVVD <sub>11</sub> NGSGMCKAGF   | D  |        |
| Arpc5    | ARPC5_MOUSE  | DENKQVDEED <sub>29</sub> GGDQAGPDE    | D  | New    |
|          | ARPC5_HUMAN  | DENKQVDEED <sub>29</sub> GGDQAGPDE    | D  |        |
| Atp6v1a  | VATA_MOUSE   | DFPELTMEVD <sub>299</sub> GKVESIMKRT  | D  | New    |
|          | VATA_HUMAN   | DFPELTMEVD <sub>299</sub> GKVESIMKRT  | D  |        |
| Atp6v1e1 | VATE1_MOUSE  | EANEKAEED <sub>31</sub> AKAEFEFNIE    | D  | New    |
|          | VATE1_HUMAN  | EANEKAEED <sub>31</sub> AKAEFEFNIE    | D  |        |
| CCDC137  | CC137_MOUSE  | EKEAKGEEPD <sub>108</sub> IAPKPKQK    | D  | New    |
|          | CC137_HUMAN  | EKEAKGEEPD <sub>108</sub> IAPKPKQK    | D  |        |
| Cfdp1    | CFDP1_MOUSE  | NELVKEDEV <sub>40</sub> GEEQAEKTKG    | D  | New    |
|          | CFDP1_HUMAN  | NELVKEDEV <sub>40</sub> GEEQTKTQK     | D  |        |
| Clta     | CLCA_MOUSE   | RAGGGPDAVD <sub>75</sub> GVMNGEYYQE   | D  | New    |
|          | CLCA_HUMAN   | EPPGGPDAVD <sub>76</sub> GVMNGEYYQE   | D  |        |
| cPLA2    | PA24A_MOUSE  | QDSFDD-ELD <sub>521</sub> AAVADPDEFE  | D  | (5)    |
|          | PA24A_HUMAN  | QDSFDDDEL <sub>522</sub> AAVADPDEFE   | D  | (4)    |
| Dars     | SYDC_MOUSE   | GQEKPREIVD <sub>19</sub> AAEDYAKERY   | D  | New    |
|          | SYDC_HUMAN   | SQEKPREIMD <sub>19</sub> AAEDYAKERY   | D  |        |
| Ddx1     | DDX1_MOUSE   | DIKVPVDEFD <sub>685</sub> GKVTYGQKRA  | D  | New    |
|          | DDX1_HUMAN   | DIKVPVDEFD <sub>685</sub> GKVTYGQKRA  | D  | (2)    |
|          | DDX1_MOUSE   | VRFLVLDEAD <sub>373</sub> GLLSQGYSD   | D  | New    |
|          | DDX1_HUMAN   | VRFLVLDEAD <sub>373</sub> GLLSQGYSD   | D  |        |
| Ebp2     | EBP2_MOUSE   | YQKGFSDKLD <sub>211</sub> FLEGDQKPV-  | D  | New    |
|          | EBP2_HUMAN   | YQKGFSDKLD <sub>211</sub> FLEGDQKPLA  | D  |        |
| Eef2     | EF2_MOUSE    | VDHGKSTLTD <sub>37</sub> SLVCKAGIIA   | D  | New    |
|          | EF2_HUMAN    | VDHGKSTLTD <sub>37</sub> SLVCKAGIIA   | D  |        |
| Eif4h    | IF4H_MOUSE   | FCYVEFDEV <sub>92</sub> SLKEALTYDG    | D  | (5)    |
|          | IF4H_HUMAN   | FCYVEFDEV <sub>93</sub> SLKEALTYDG    | D  | (2, 3) |
| Fam21    | FAM21_MOUSE  | FEDDDDEV <sub>668</sub> LFIAIKDSQK    | D  | New    |
|          | FAM21_HUMAN  | SLFEEDKEDD <sub>664</sub> LFIAIKDSQK  | D  |        |
| Fam136a  | F136A_MOUSE  | QQLRVQEAVD <sub>14</sub> AMVKSVEREN   | D  | New    |
|          | F136A_HUMAN  | QQLRVQEAVE <sub>14</sub> SMVKSLEREN   | E  |        |
| Gstp1    | GSTP1_MOUSE  | KNQREAAQMD <sub>91</sub> MVNDGVEDLR   | D  | New    |
|          | GSTP1_HUMAN  | KDQQEAALVD <sub>91</sub> MVNDGVEDLR   | D  |        |
| Hcls1    | HCLS1_MOUSE  | ETEKHESQRD <sub>189</sub> YAKFGGQYG   | D  | New    |
|          | HCLS1_HUMAN  | ETEKHESQRD <sub>189</sub> YAKFGGQYG   | D  | (2)    |
| Hdgf     | HDGF_MOUSE   | EKNSTPSEPD <sub>205</sub> SGQGGPPAEEE | D  | New    |
|          | HDGF_HUMAN   | EKNSTPSEPD <sub>205</sub> SGRGGPPAEEE | G  |        |
| Hnrnpu   | O88568_MOUSE | RQGQQAGGD <sub>206</sub> GKTEQKGGDK   | D  | New    |
|          | HNRPU_HUMAN  | GGRPGAPAGD <sub>231</sub> GKTEQKGGDK  | D  | (4)    |
| Hs1bp3   | H1BP3_MOUSE  | DSLKLFDDPD <sub>274</sub> LGGAVSLGDP  | D  | New    |
|          | H1BP3_HUMAN  | DPLKLFDDPD <sub>270</sub> LGGAIPLGDS  | D  |        |
| Hsp60    | CH60_MOUSE   | GRKGVITVKD <sub>203</sub> GKTLNDELEI  | D  | New    |
|          | CH60_HUMAN   | GRKGVITVKD <sub>203</sub> GKTLNDELEI  | D  |        |
|          | CH60_MOUSE   | PLVIAEDVD <sub>279</sub> GEALSTLVLN   | D  | New    |
|          | CH60_HUMAN   | PLVIAEDVD <sub>279</sub> GEALSTLVLN   | D  |        |
| Hsp60    | CH60_MOUSE   | TKVVRTALLD <sub>531</sub> AAGVASLLTT  | D  | New    |
|          | CH60_HUMAN   | TKVVRTALLD <sub>531</sub> AAGVASLLTT  | D  |        |

**Supplemental Table 4 (continued)**

| Protein | Uniprot ID  | Cleavage site                         | P1 | Status |
|---------|-------------|---------------------------------------|----|--------|
| Hsp90b1 | ENPL_MOUSE  | GFVRADDEVD <sub>26</sub> VDGTVEEDLG   | D  | (5)    |
|         | ENPL_HUMAN  | GSVRADDEVD <sub>26</sub> VDGTVEEDLG   | D  | (4)    |
|         | ENPL_MOUSE  | VRADDEVDVD <sub>28</sub> GTVEEDLGKS   | D  | New    |
|         | ENPL_HUMAN  | VRADDEVDVD <sub>28</sub> GTVEEDLGKS   | D  | (2, 4) |
|         | ENPL_MOUSE  | QREEEAIQLD <sub>59</sub> GLNASQIREL   | D  | New    |
|         | ENPL_HUMAN  | QREEEAIQLD <sub>59</sub> GLNASQIREL   | D  |        |
| Kifap3  | KIFA3_MOUSE | ELSKKKKAVD <sub>249</sub> EDLENQTLRK  | D  | New    |
|         | KIFA3_HUMAN | ELSKKKKAVD <sub>249</sub> EDPENQTLRK  | D  |        |
| Larp1   | LARP1_MOUSE | PPIVDYSQTD <sub>472</sub> FSQLLNCPEF  | D  | New    |
|         | LARP1_HUMAN | PPIVDYSQTD <sub>495</sub> FSQLLNCPEF  | D  |        |
| Mki67ip | MK671_MOUSE | RSRRKKSVD <sub>252</sub> SQGPTPVCTP   | D  | New    |
|         | MK671_HUMAN | -T-PEK-TVD <sub>229</sub> SQGPTPVCTP  | D  |        |
| Mobk13  | MOBL3_MOUSE | WPDESFDEMD <sub>34</sub> STLAVQQYIQ   | D  | New    |
|         | MOBL3_HUMAN | WPDESFDEMD <sub>34</sub> STLAVQQYIQ   | D  |        |
| Mybbp1a | MBB1A_MOUSE | PEKNAASQDD <sub>1201</sub> AVTEGAMPAA | D  | New    |
|         | MBB1A_HUMAN | P----A--ED <sub>1194</sub> ----GT-PAA | D  |        |
| Myh9    | MYH9_MOUSE  | LKTELEDTLD <sub>1153</sub> STAAQQELRS | D  | New    |
|         | MYH9_HUMAN  | LKTELEDTLD <sub>1153</sub> STAAQQELRS | D  | (2, 4) |
| Npm1    | NPM_MOUSE   | KVPVKKSVD <sub>197</sub> TPAKNAQKSN   | D  | New    |
|         | NPM_HUMAN   | KAPVKKSIRD <sub>198</sub> TPAKNAQKSN  | D  |        |
| Nucks1  | NUCKS_MOUSE | DDADEDYGRD <sub>29</sub> SGPPAKKIRS   | D  | New    |
|         | NUCKS_HUMAN | DDADEDYGRD <sub>29</sub> SGPPTKKIRS   | D  | (2, 3) |
| Pkm2    | KPYM_MOUSE  | GSDVANAVLD <sub>354</sub> GADCIMLSGE  | D  | New    |
|         | KPYM_HUMAN  | GSDVANAVLD <sub>354</sub> GADCIMLSGE  | D  |        |
| Ppqb    | PPGB_MOUSE  | EAAPDQDEID <sub>31</sub> CLPGLAKQPS   | D  | New    |
|         | PPGB_HUMAN  | EAAPDQDEIQ <sub>36</sub> RLPGLAKQPS   | Q  |        |
| Prkar2a | KAP2_MOUSE  | -GQQPPDLVD <sub>30</sub> FAVEYFTRLR   | D  | New    |
|         | KAP2_HUMAN  | LRQQPPDLVE <sub>31</sub> FAVEYFTRLR   | D  |        |
| Prpsap2 | KPRB_MOUSE  | IVDDIIDDVD <sub>276</sub> SFLAAAETLK  | D  | New    |
|         | KPRB_HUMAN  | IVDDIIDDVD <sub>276</sub> SFLAAAETLK  | D  |        |
| PRS8    | PRS8_MOUSE  | xxxxxxxMALD <sub>4</sub> GPEQMELEEG   | D  | New    |
|         | PRS8_HUMAN  | xxxxxxxMALD <sub>4</sub> GPEQMELEEG   | D  |        |
| Ptp1    | PTBP1_MOUSE | xxxxxxxxxMD <sub>2</sub> GIVPDIAGVT   | D  | New    |
|         | PTBP1_HUMAN | xxxxxxxxxMD <sub>2</sub> GIVPDIAGVT   | D  | (2)    |
|         | PTBP1_MOUSE | ALAASAAAVD <sub>171</sub> AGMAMAGQSP  | D  | New    |
| Rpl5    | RL5_MOUSE   | NGGEYNVESID <sub>136</sub> DGQPGAFTCY | D  | New    |
|         | RL5_HUMAN   | TGDEYNVESID <sub>136</sub> DGQPGAFTCY | D  |        |
| Rpl28   | RL28_MOUSE  | KTVGVPEAAD <sub>56</sub> GKGVVVVVKR   | D  | New    |
|         | RL28_HUMAN  | KTVGVPEAAD <sub>56</sub> GKGVVVVVKR   | D  |        |
| Rps18   | RS18_MOUSE  | FLNRQKDVKD <sub>92</sub> GKYSQVLANG   | D  | New    |
|         | RS18_HUMAN  | FLNRQKDVKD <sub>92</sub> GKYSQVLANG   | D  |        |
| Srrm2   | SRRM2_MOUSE | SRSGSSQELD <sub>1502</sub> GKPSASPQER | D  | New    |
|         | SRRM2_HUMAN | SRSGSSQELD <sub>1546</sub> VKPSASPQER | D  |        |
|         | SRRM2_MOUSE | ASPQERSED <sub>1516</sub> SSPDSKPKTR  | D  | New    |
|         | SRRM2_HUMAN | ASPQERSED <sub>1560</sub> SSPDSKAKTR  | D  |        |
| Stmn1   | STMN1_MOUSE | SPRSKESVPD <sub>34</sub> FPLSPPKKKD   | D  | New    |
|         | STMN1_HUMAN | SPRSKESVPE <sub>34</sub> FPLSPPKKKD   | E  |        |
| Tardbp  | TADBP_MOUSE | DNKRKMD <sub>89</sub> ASSAVKVKRA      | D  | New    |
|         | TADBP_HUMAN | DNKRKMD <sub>89</sub> ASSAVKVKRA      | D  | (2, 4) |



**Supplemental Table 4 (continued)**

| <b>Protein</b> | <b>Uniprot ID</b> | <b>Cleavage site</b>                 | <b>P1</b> | <b>Status</b> |
|----------------|-------------------|--------------------------------------|-----------|---------------|
| U2af2          | U2AF2_MOUSE       | TALLPTMTPD <sub>128</sub> GLAVTPTPVP | D         | New           |
|                | U2AF2_HUMAN       | TALLPTMTPD <sub>128</sub> GLAVTPTPVP | D         | (2, 4)        |
| Usp5           | UBP5_MOUSE        | WIFSHIDDL <sub>767</sub> AEAAMDISEG  | D         | New           |
|                | UBP5_HUMAN        | WIFSHIDDL <sub>767</sub> AEAAMDISEG  | D         |               |
| VATH           | VATH_MOUSE        | TKMDIRGAVD <sub>11</sub> AAVPTNIIAA  | D         | New           |
|                | VATH_HUMAN        | TKMDIRGAVD <sub>11</sub> AAVPTNIIAA  | D         |               |
| Vim            | VIME_MOUSE        | GVRLQDSVD <sub>85</sub> FSLADAINTE   | D         | New           |
|                | VIME_HUMAN        | GVRLQDSVD <sub>85</sub> FSLADAINTE   | D         | (2-4)         |
| Wbp11          | WBP11_MOUSE       | FGHREDSERD <sub>297</sub> NTEKKSGLS  | D         | New           |
|                | WBP11_HUMAN       | FVHRDNGERD <sub>297</sub> NNEKKSGLS  | D         |               |

## References of Supplemental Tables

1. Thiede, B., et al., *Shotgun proteome analysis of protein cleavage in apoptotic cells*. Proteomics, 2005. **5**(8): p. 2123-30.
2. Van Damme, P., et al., *Caspase-specific and nonspecific in vivo protein processing during Fas-induced apoptosis*. Nat Methods, 2005. **2**(10): p. 771-7.
3. Impens, F., et al., *Mechanistic insight into taxol-induced cell death*. Oncogene, 2008. **27**(33): p. 4580-91.
4. Gausdal, G., et al., *Abolition of stress-induced protein synthesis sensitizes leukemia cells to anthracycline-induced death*. Blood, 2008. **111**(5): p. 2866-77.
5. Lamkanfi, M., et al., *Targeted peptidecentric proteomics reveals caspase-7 as a substrate of the caspase-1 inflammasomes*. Mol Cell Proteomics, 2008. **7**(12): p. 2350-63.
6. Adam-Klages, S., et al., *Caspase-mediated inhibition of human cytosolic phospholipase A2 during apoptosis*. J Immunol, 1998. **161**(10): p. 5687-94.
7. Atsumi, G., et al., *Fas-induced arachidonic acid release is mediated by Ca<sup>2+</sup>-independent phospholipase A2 but not cytosolic phospholipase A2, which undergoes proteolytic inactivation*. J Biol Chem, 1998. **273**(22): p. 13870-7.
8. Luschen, S., et al., *Cleavage of human cytosolic phospholipase A2 by caspase-1 (ICE) and caspase-8 (FLICE)*. Biochem Biophys Res Commun, 1998. **253**(1): p. 92-8.
9. Kayalar, C., et al., *Cleavage of actin by interleukin 1 beta-converting enzyme to reverse DNase I inhibition*. Proc Natl Acad Sci U S A, 1996. **93**(5): p. 2234-8.

10. Mashima, T., et al., *Actin cleavage by CPP-32/apopain during the development of apoptosis*. *Oncogene*, 1997. **14**(9): p. 1007-12.
11. Back, S.H., S. Shin, and S.K. Jang, *Polypyrimidine tract-binding proteins are cleaved by caspase-3 during apoptosis*. *J Biol Chem*, 2002. **277**(30): p. 27200-9.
12. Enoksson, M., et al., *Identification of proteolytic cleavage sites by quantitative proteomics*. *J Proteome Res*, 2007. **6**(7): p. 2850-8.
13. Gerner, C., et al., *The Fas-induced apoptosis analyzed by high throughput proteome analysis*. *J Biol Chem*, 2000. **275**(50): p. 39018-26.

**Supplemental Figure 1**

**List of identified high scoring MS/MS spectra (n=55)**

***AcD3-SFLAAAETLK(AcD3K\*)ER(C13\*)-COOH***  
**precursor mass: 716.4500 Da (charge: +2) protein: Q8R574 (277-288)**  
**score (threshold): 46.0 (31.0)**  
**instrument: Bruker Esquire HCT**

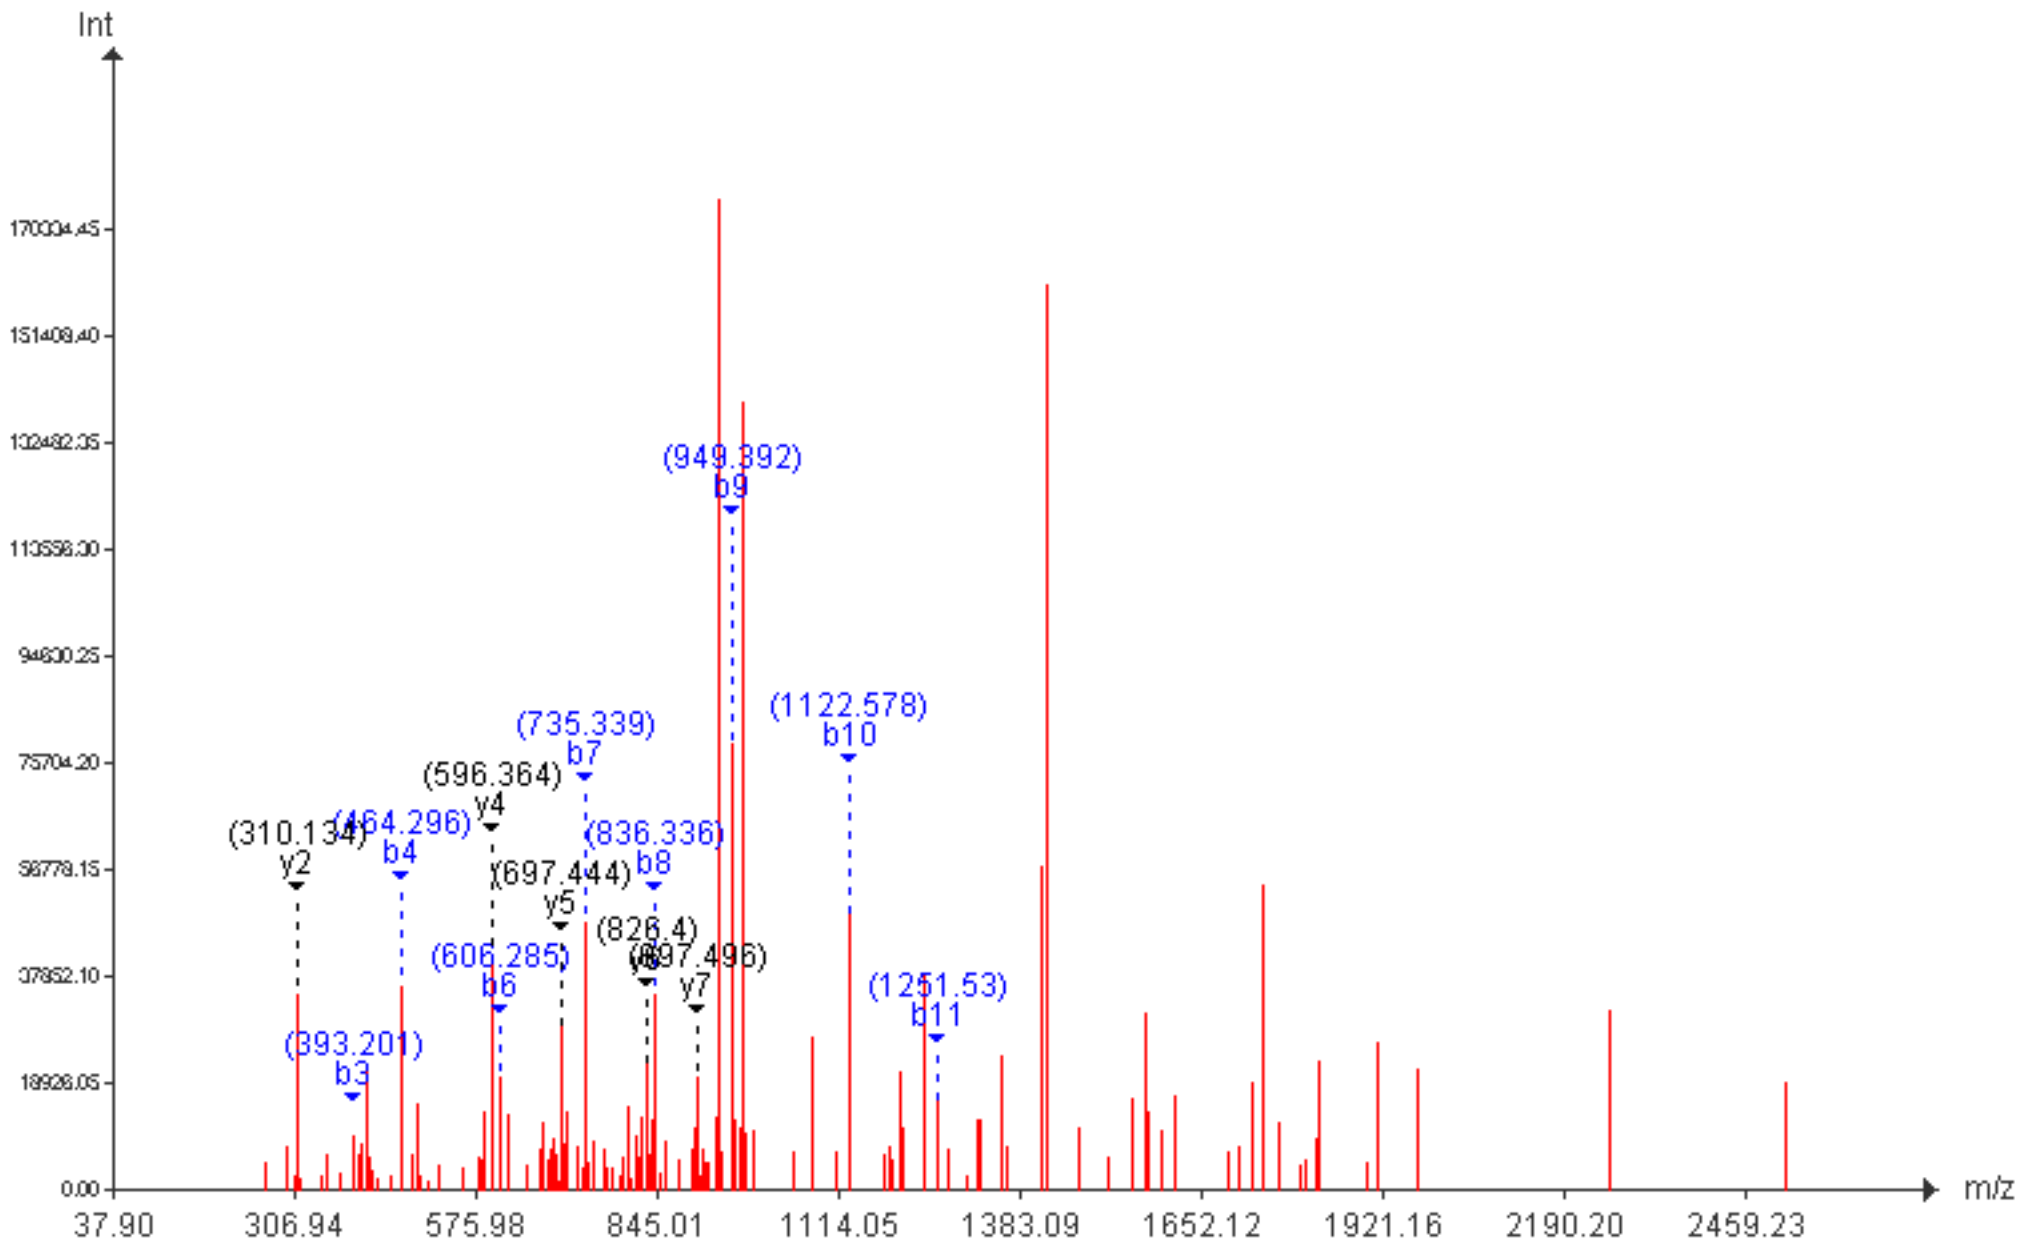

**AcD3-GK(AcD3K\*)YSQVLANGLDNK(AcD3K\*)LR-COOH**  
**precursor mass: 956.0190 Da (charge: +2) protein: P62270 (93-108)**  
**score (threshold): 55.0 (31.0)**  
**instrument: Bruker Esquire HCT**

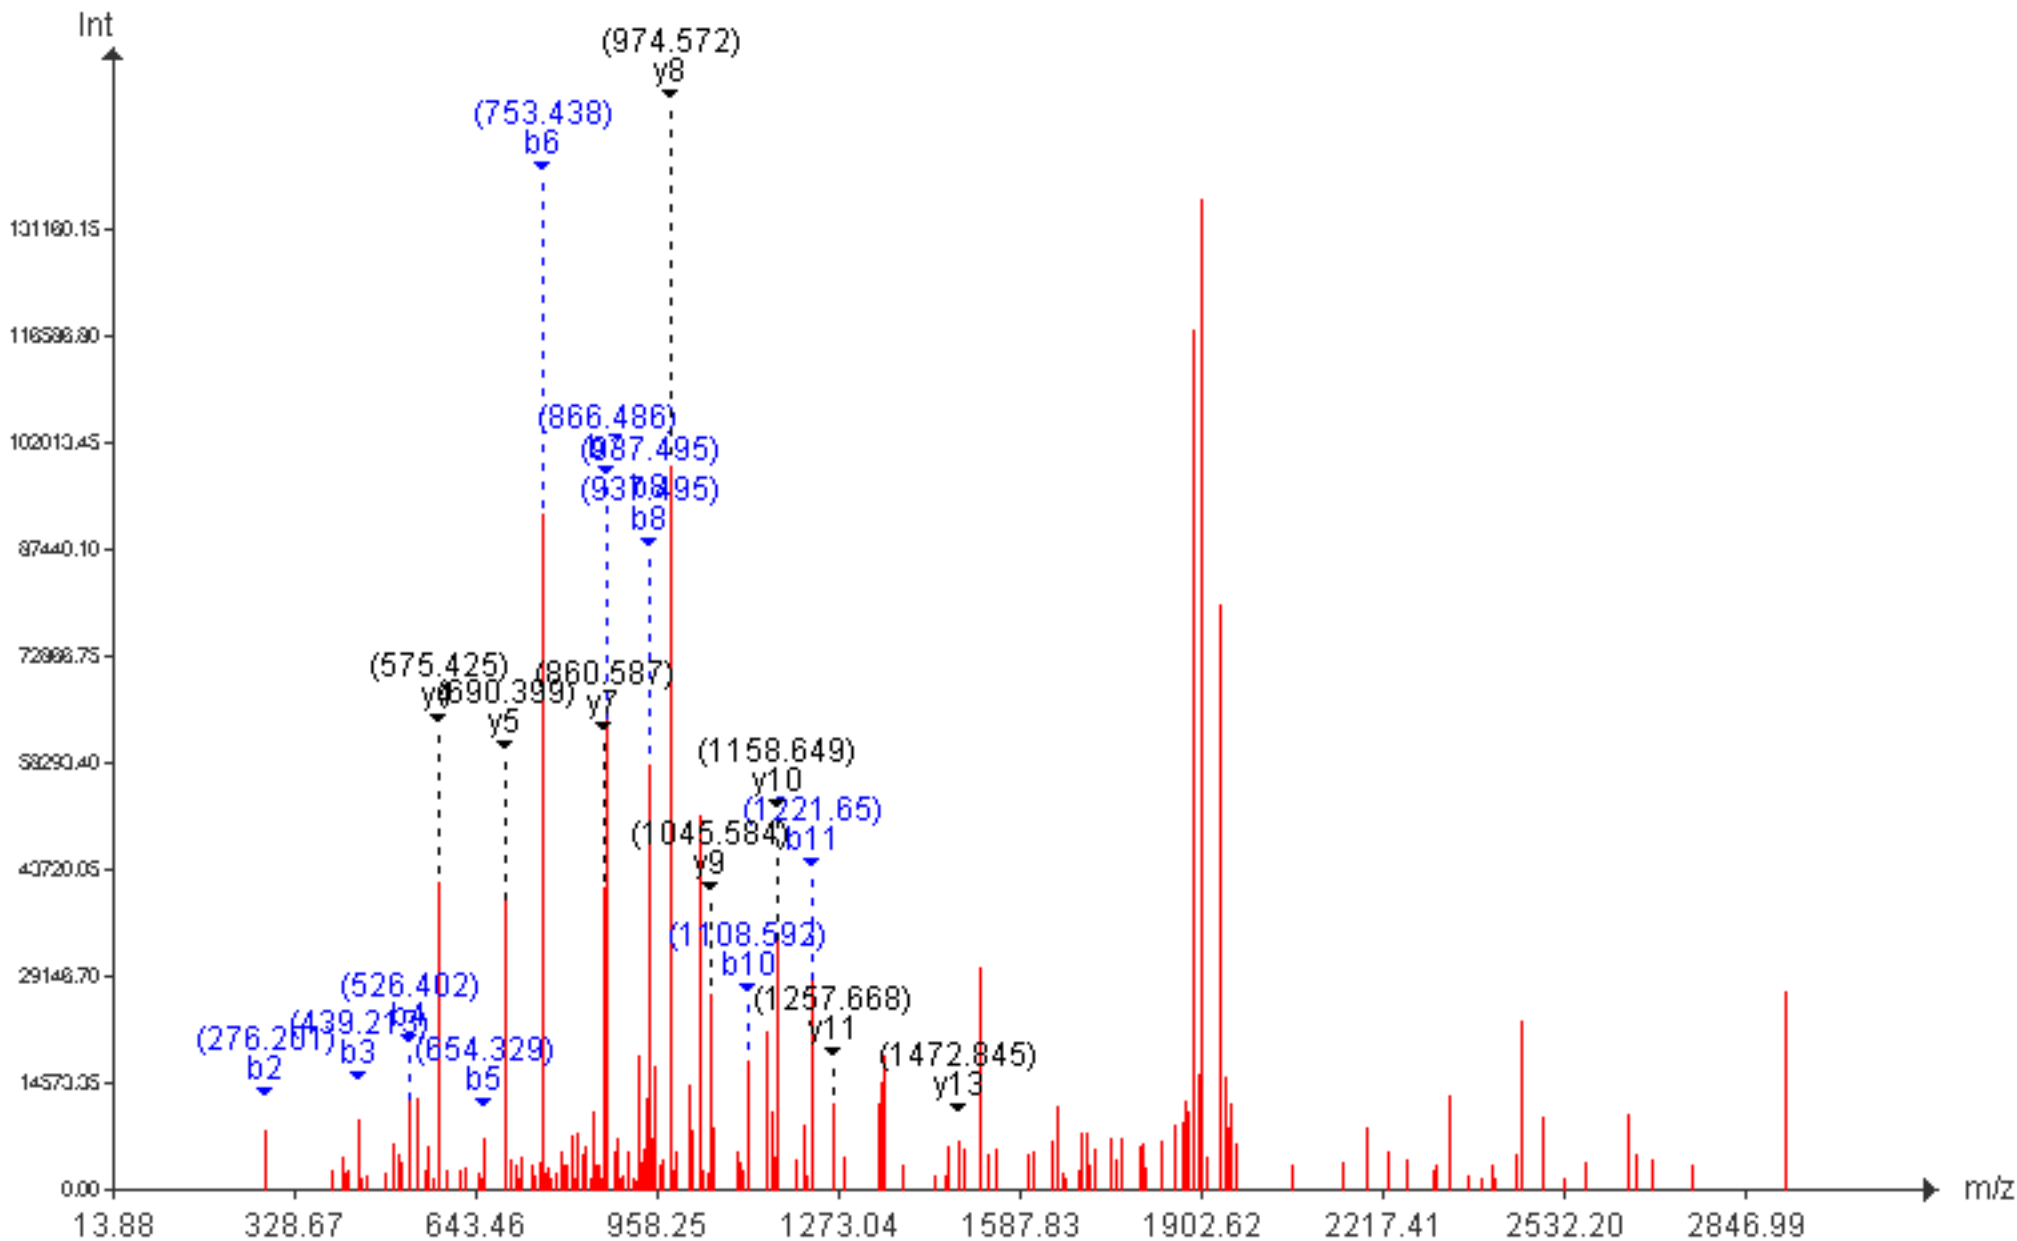

**AcD3-IAVPK(AcD3K\*)FK(AcD3K\*)QR-COOH**  
**precursor mass: 611.3920 Da (charge: +2) protein: IPI00401962.2 (109-117)**  
**score (threshold): 49.0 (34.0)**  
**instrument: Bruker Esquire HCT**

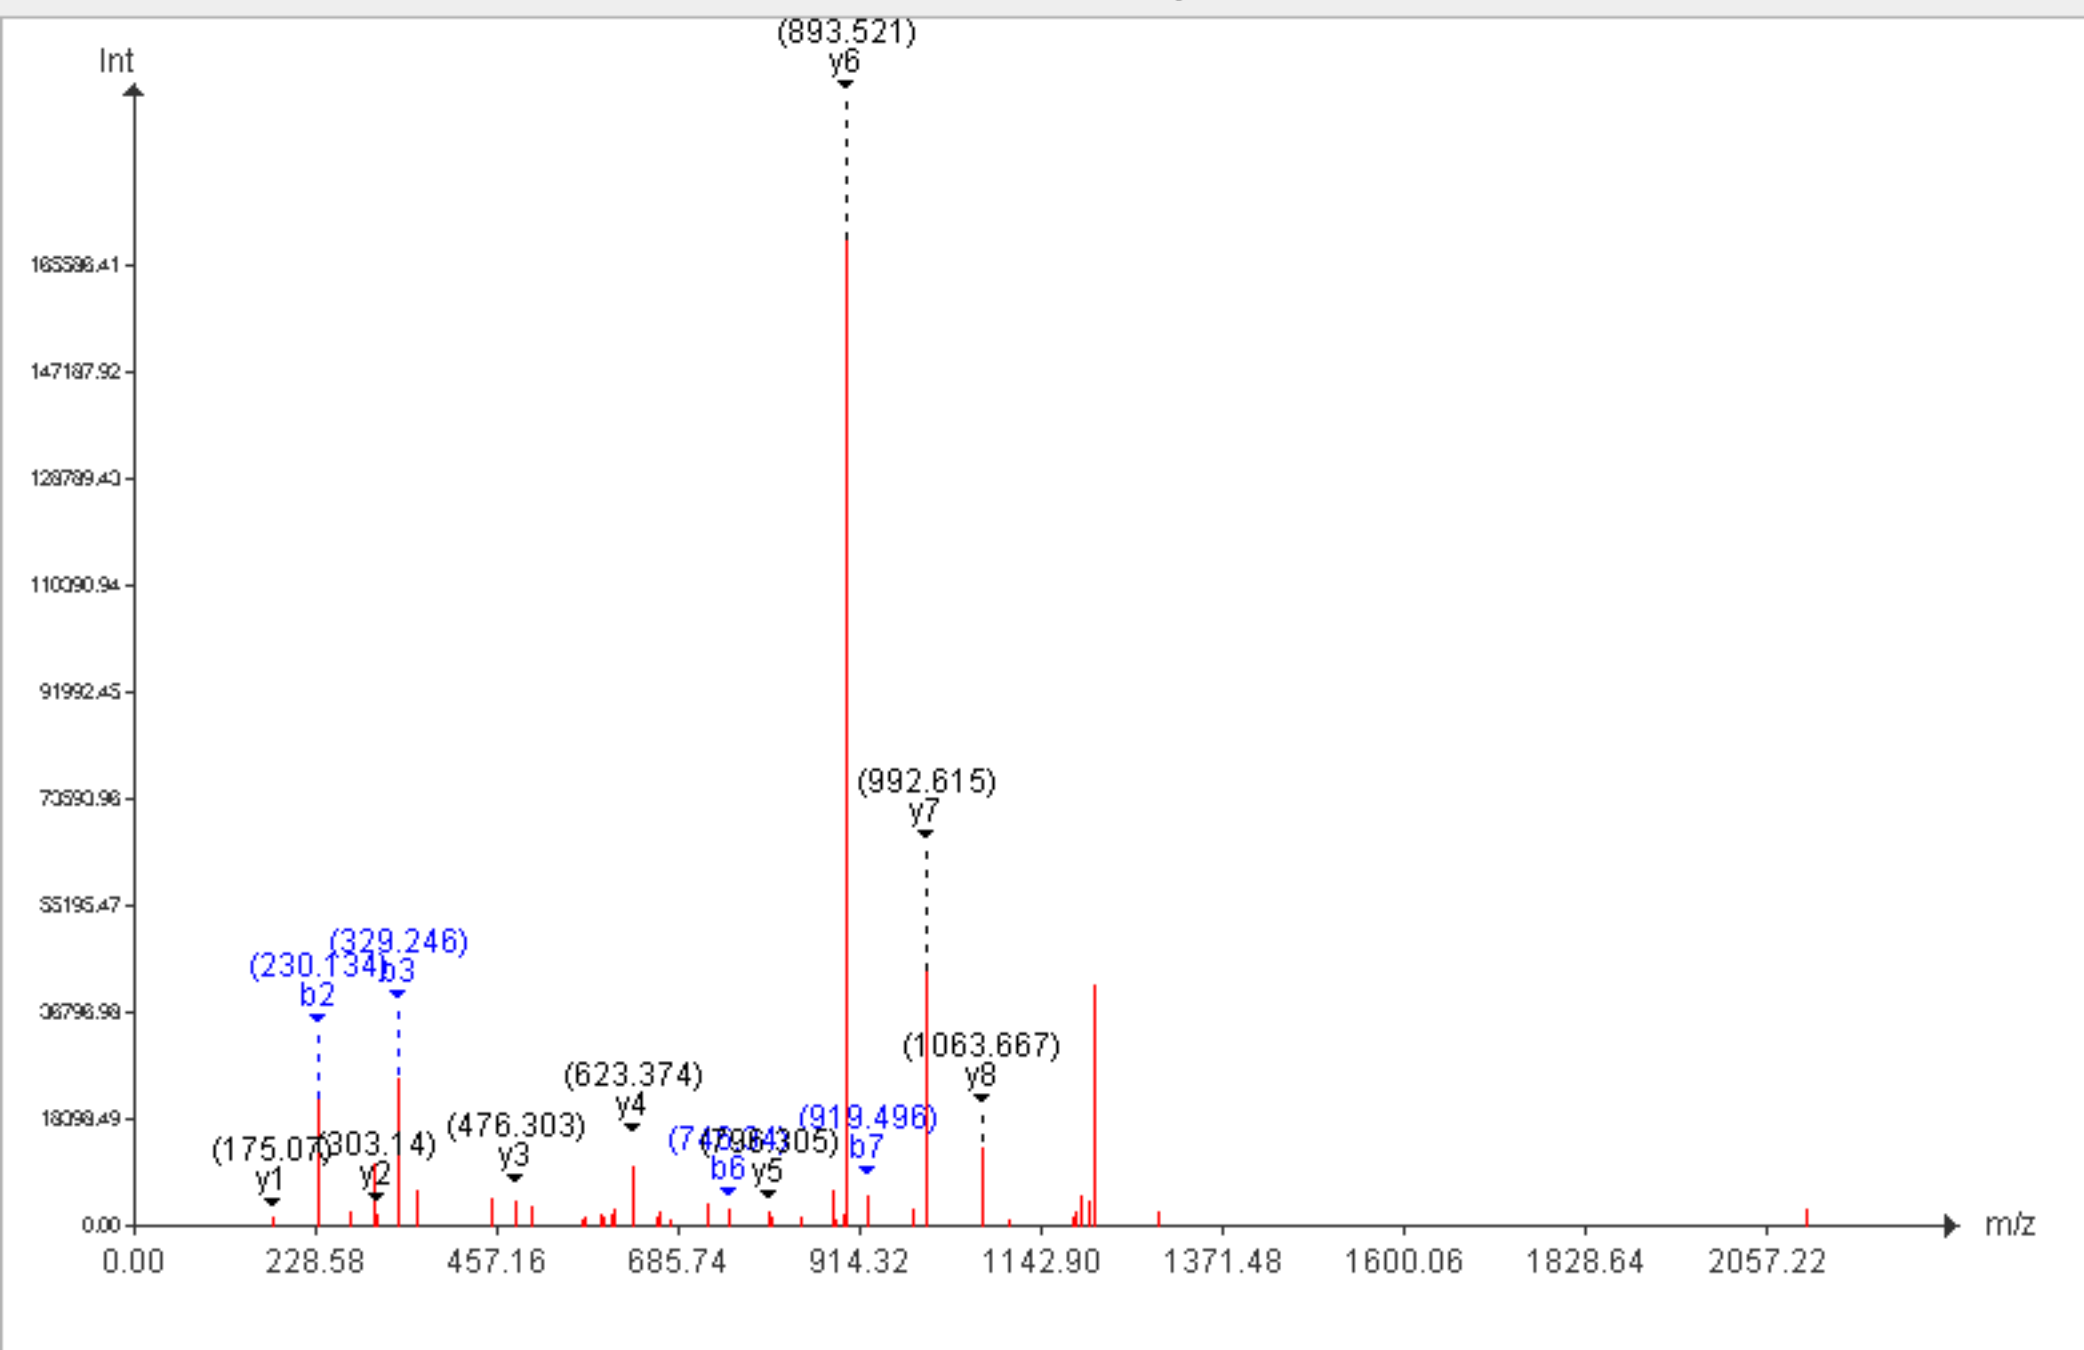

*AcD3-GLLSQGYSDFINR(C13\*)-COOH*

precursor mass: 760.8660 Da (charge: +2) protein: Q91VR5 (374-386)

score (threshold): 39.0 (31.0)

instrument: Bruker Esquire HCT

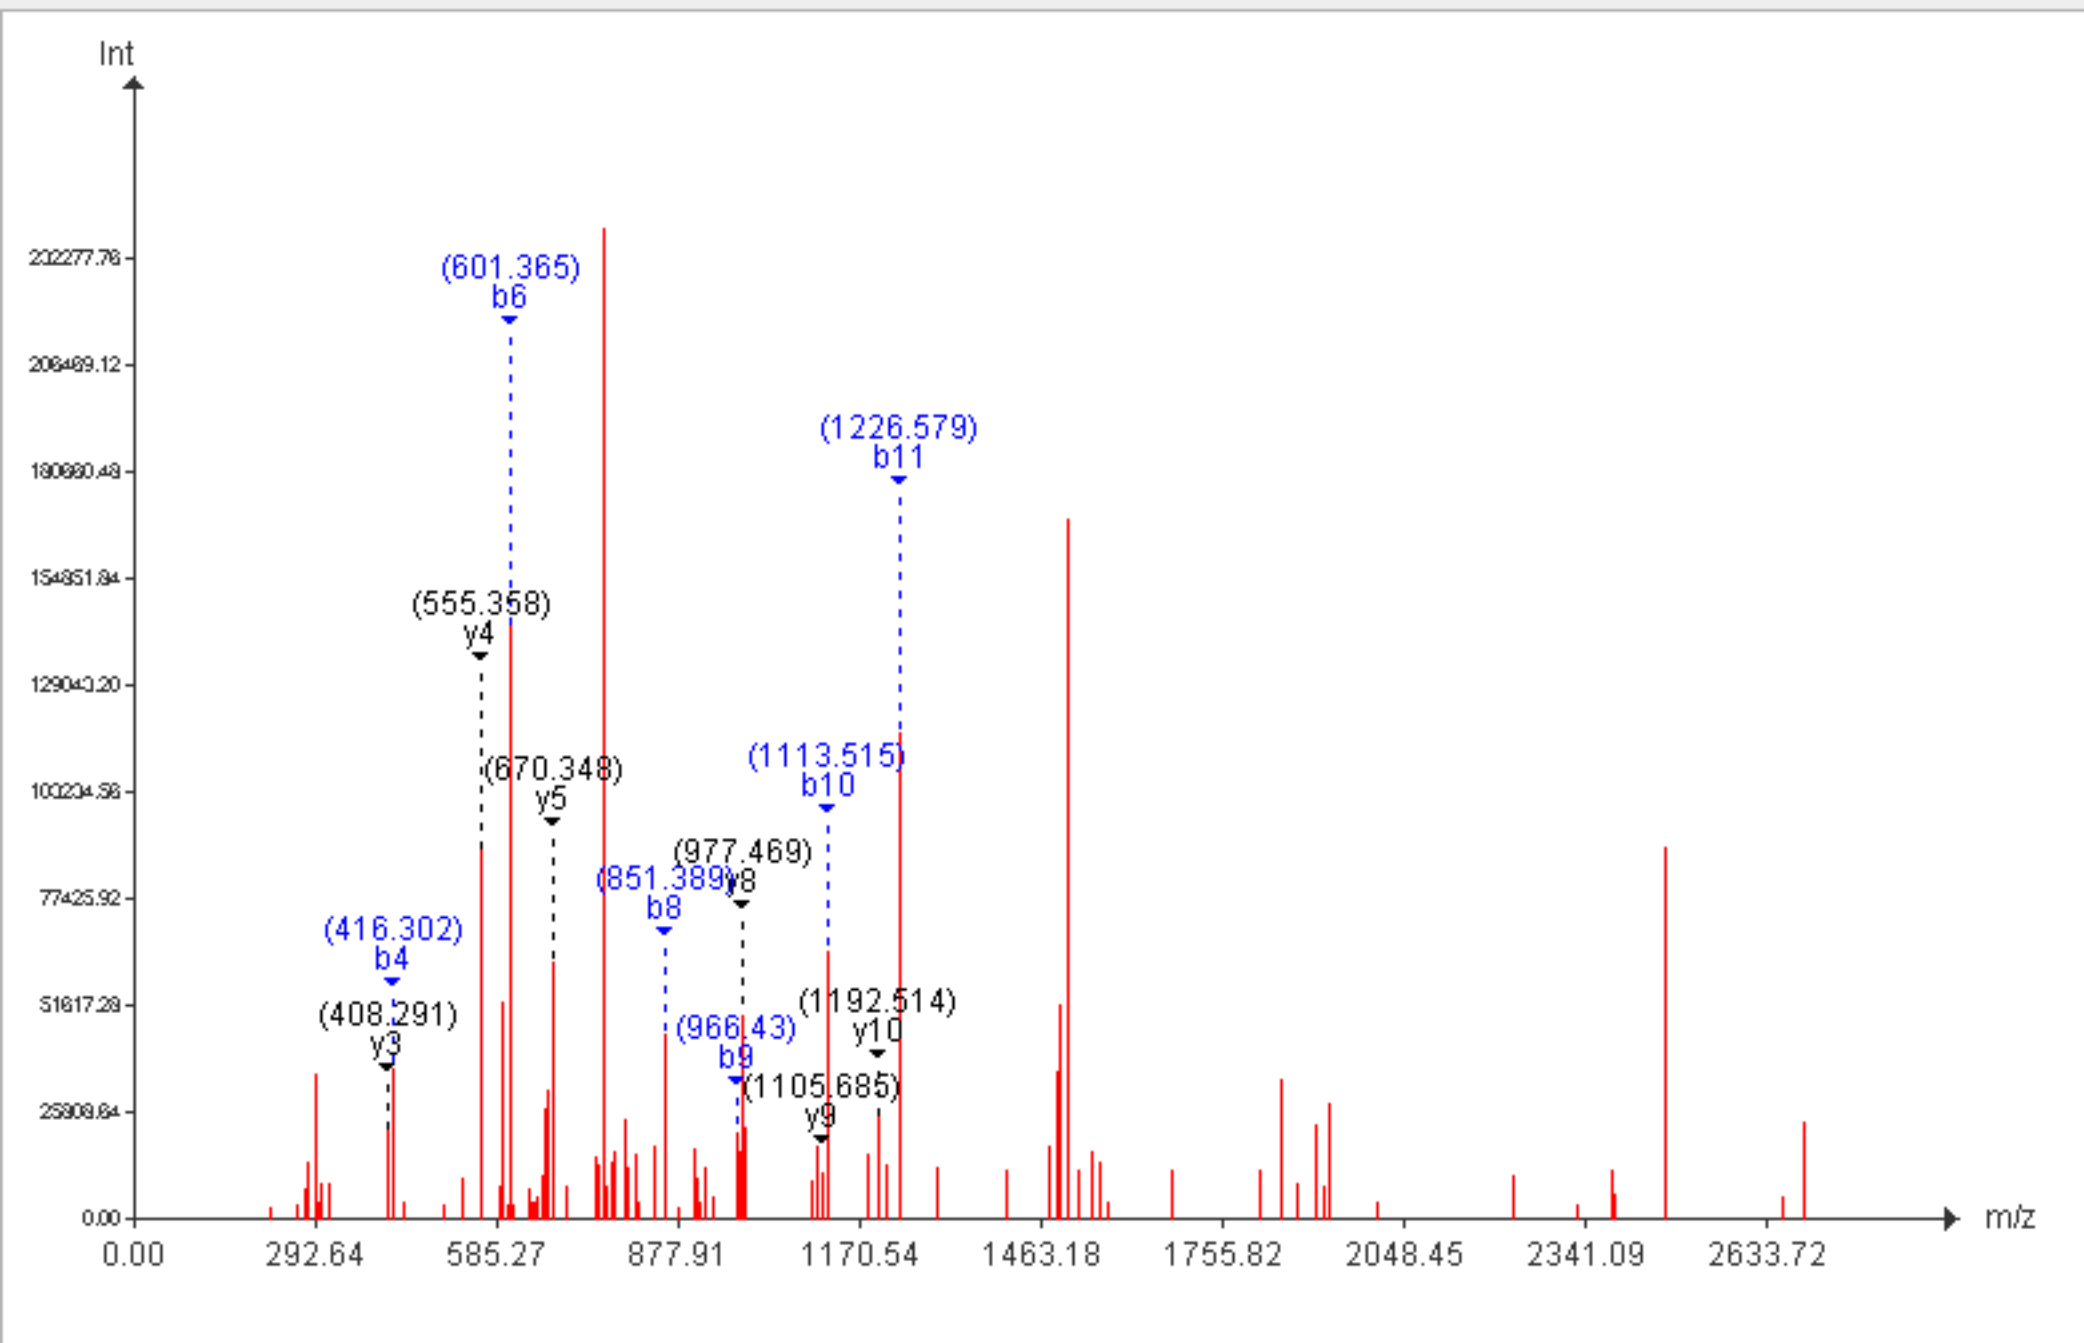



**AcD3-GLAVTPVPVVGSM(Mox)TR-COOH**  
**precursor mass: 935.9410 Da (charge: +2) protein: P26369 (129-146)**  
**score (threshold): 53.0 (31.0)**  
**instrument: Bruker Esquire HCT**

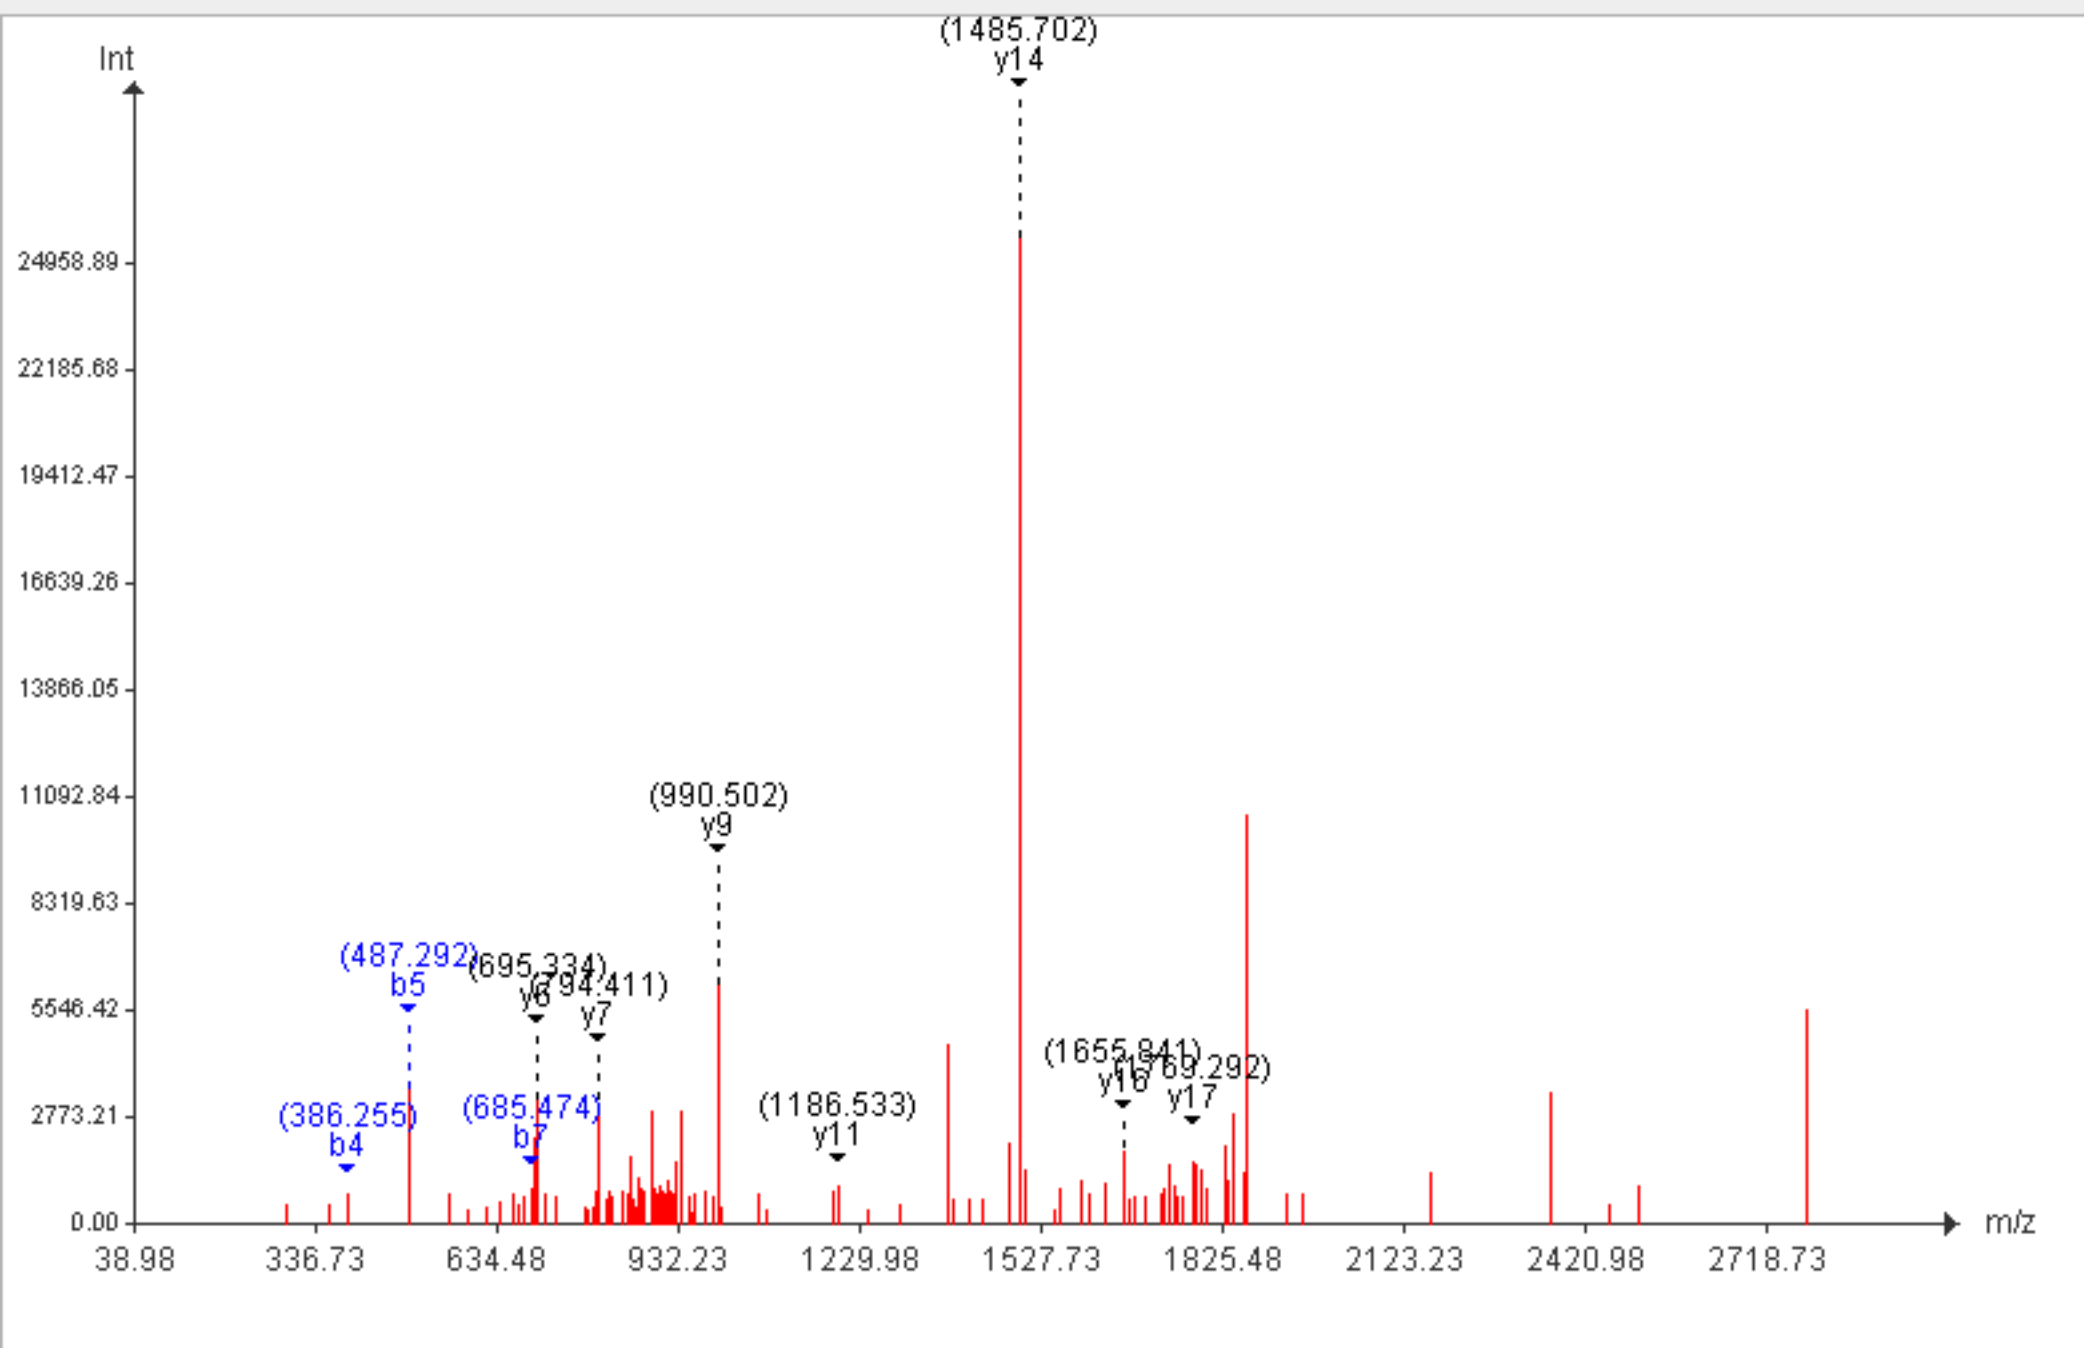

**AcD3-AAVPTNIIAAK(AcD3K\*)AAEVR-COOH**  
**precursor mass: 842.9030 Da (charge: +2) protein: Q8BVE3 (12-27)**  
**score (threshold): 47.0 (31.0)**  
**instrument: Bruker Esquire HCT**

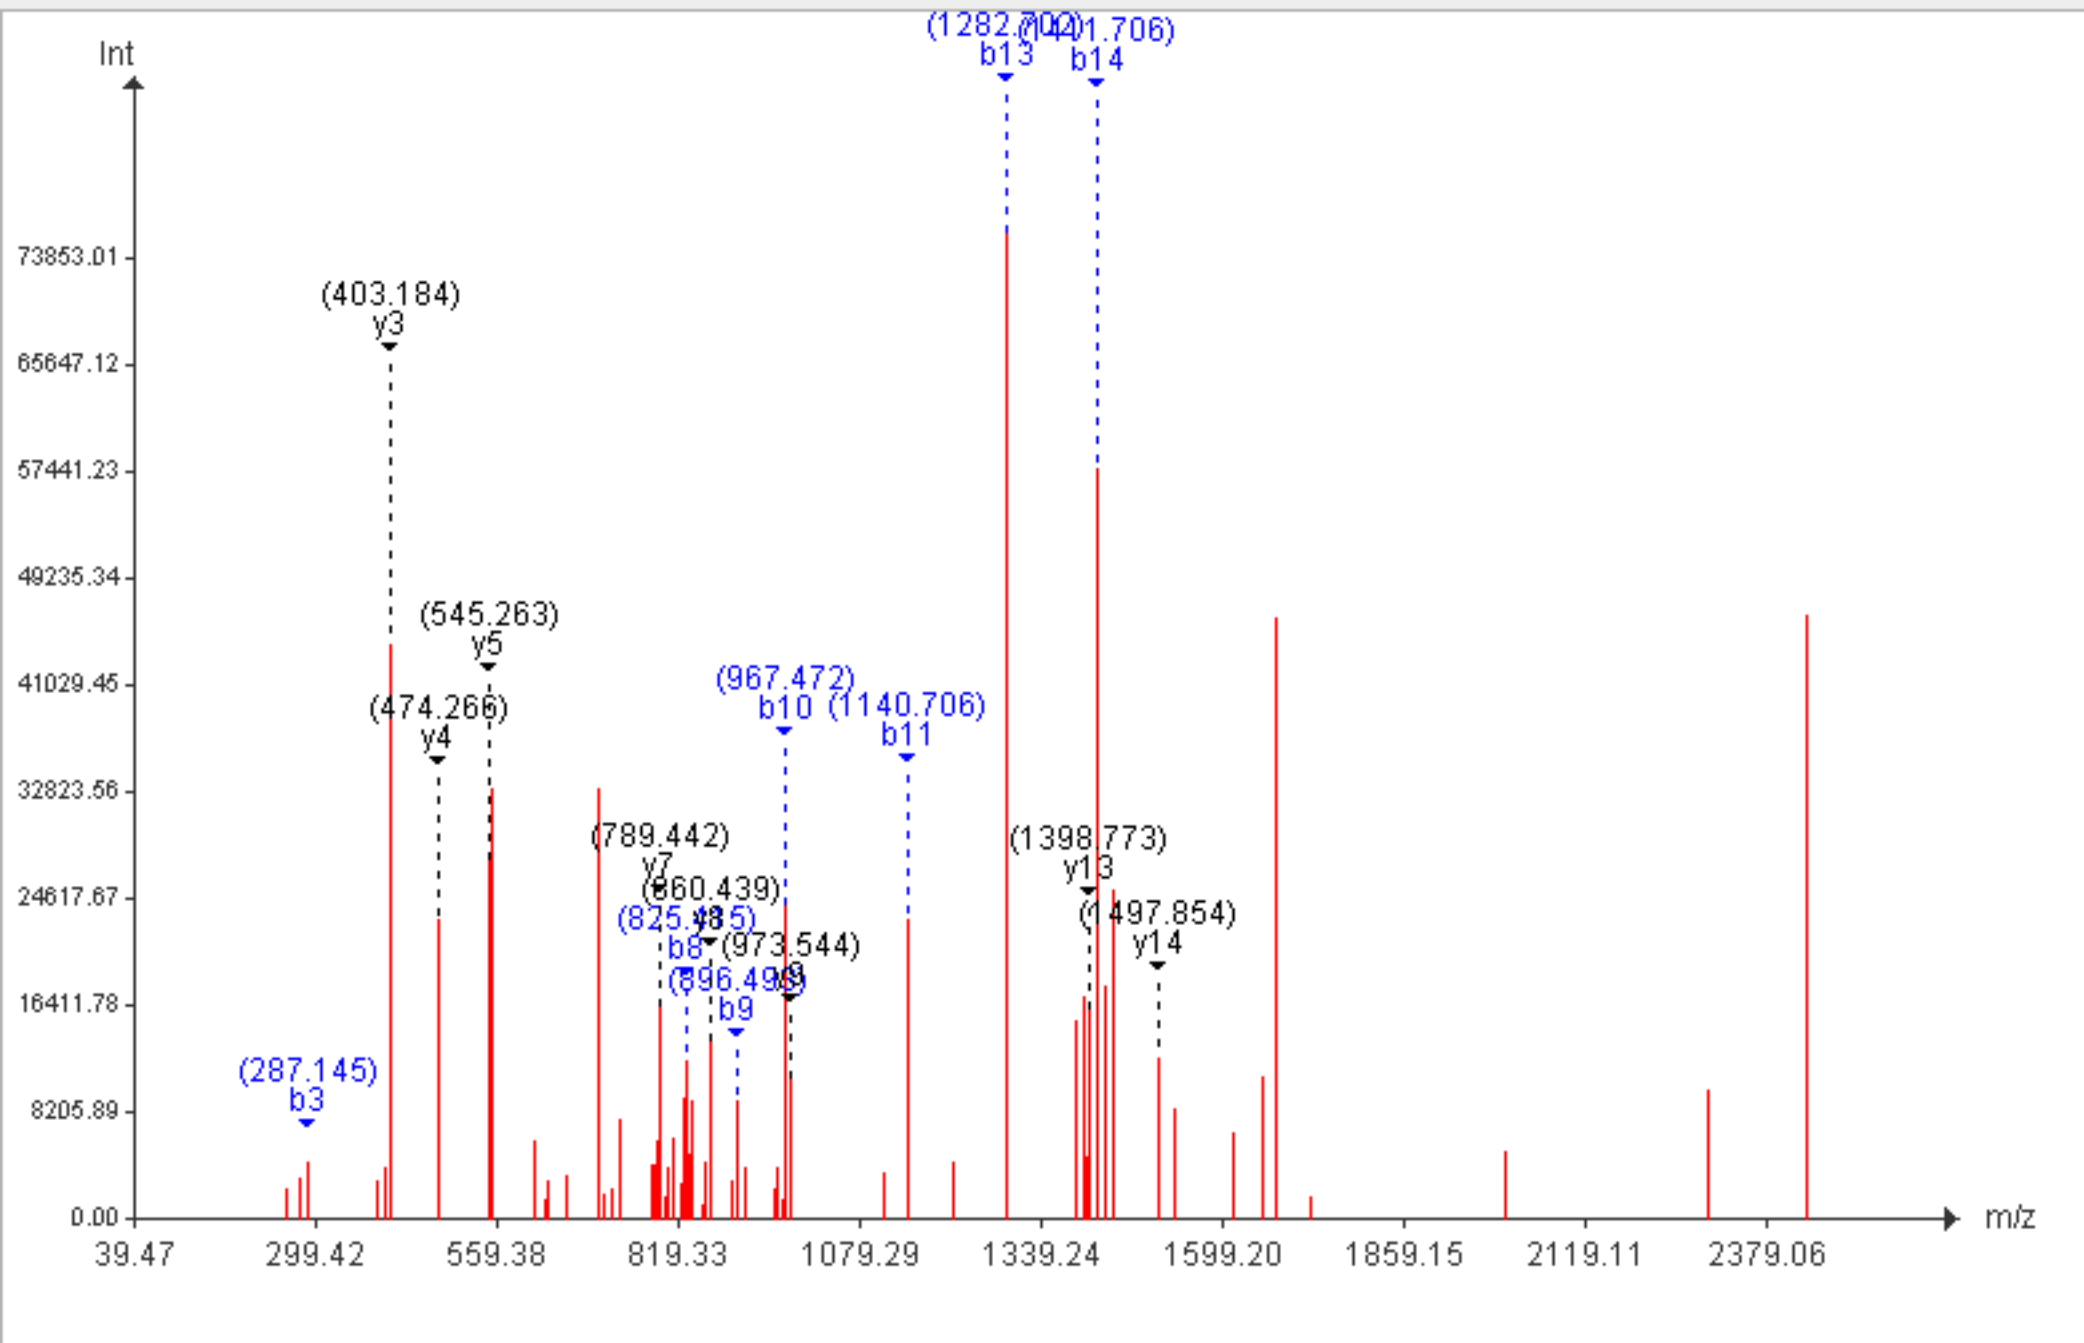

**AcD3-STLAVQQYIQQNIR(C13\*)-COOH**

**precursor mass: 856.9120 Da (charge: +2) protein: Q6PEB6 (35-48)**

**score (threshold): 60.0 (31.0)**

**instrument: Bruker Esquire HCT**

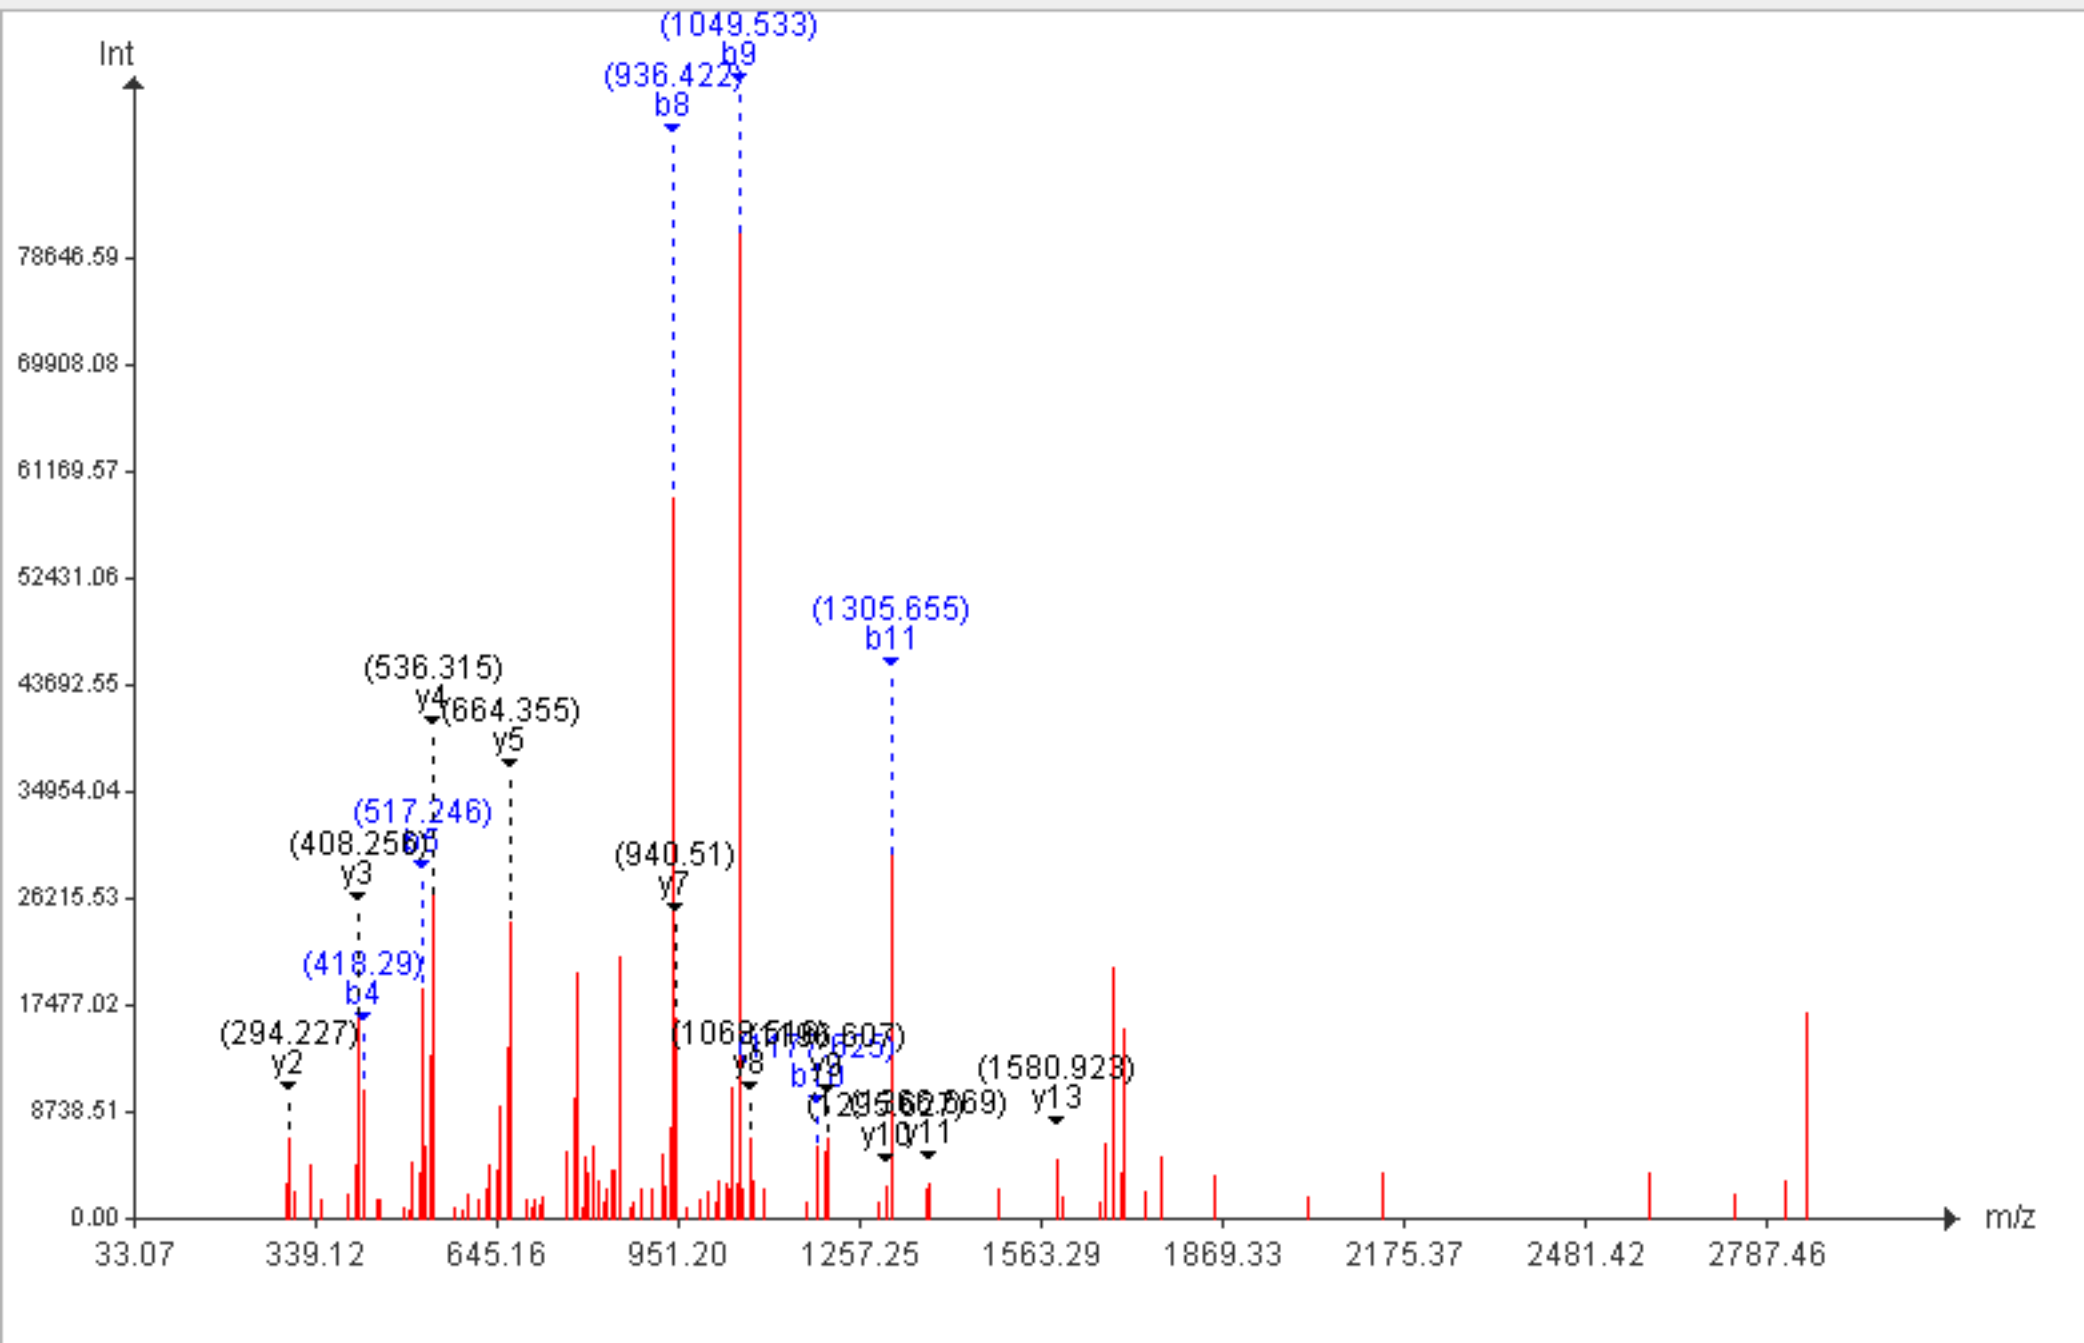

**AcD3-SLVC(Cmm\*)K(AcD3K\*)AGIIASAR(C13\*)-COOH**  
**precursor mass: 721.4330 Da (charge: +2) protein: P58252 (37-49)**  
**score (threshold): 39.0 (31.0)**  
**instrument: Bruker Esquire HCT**

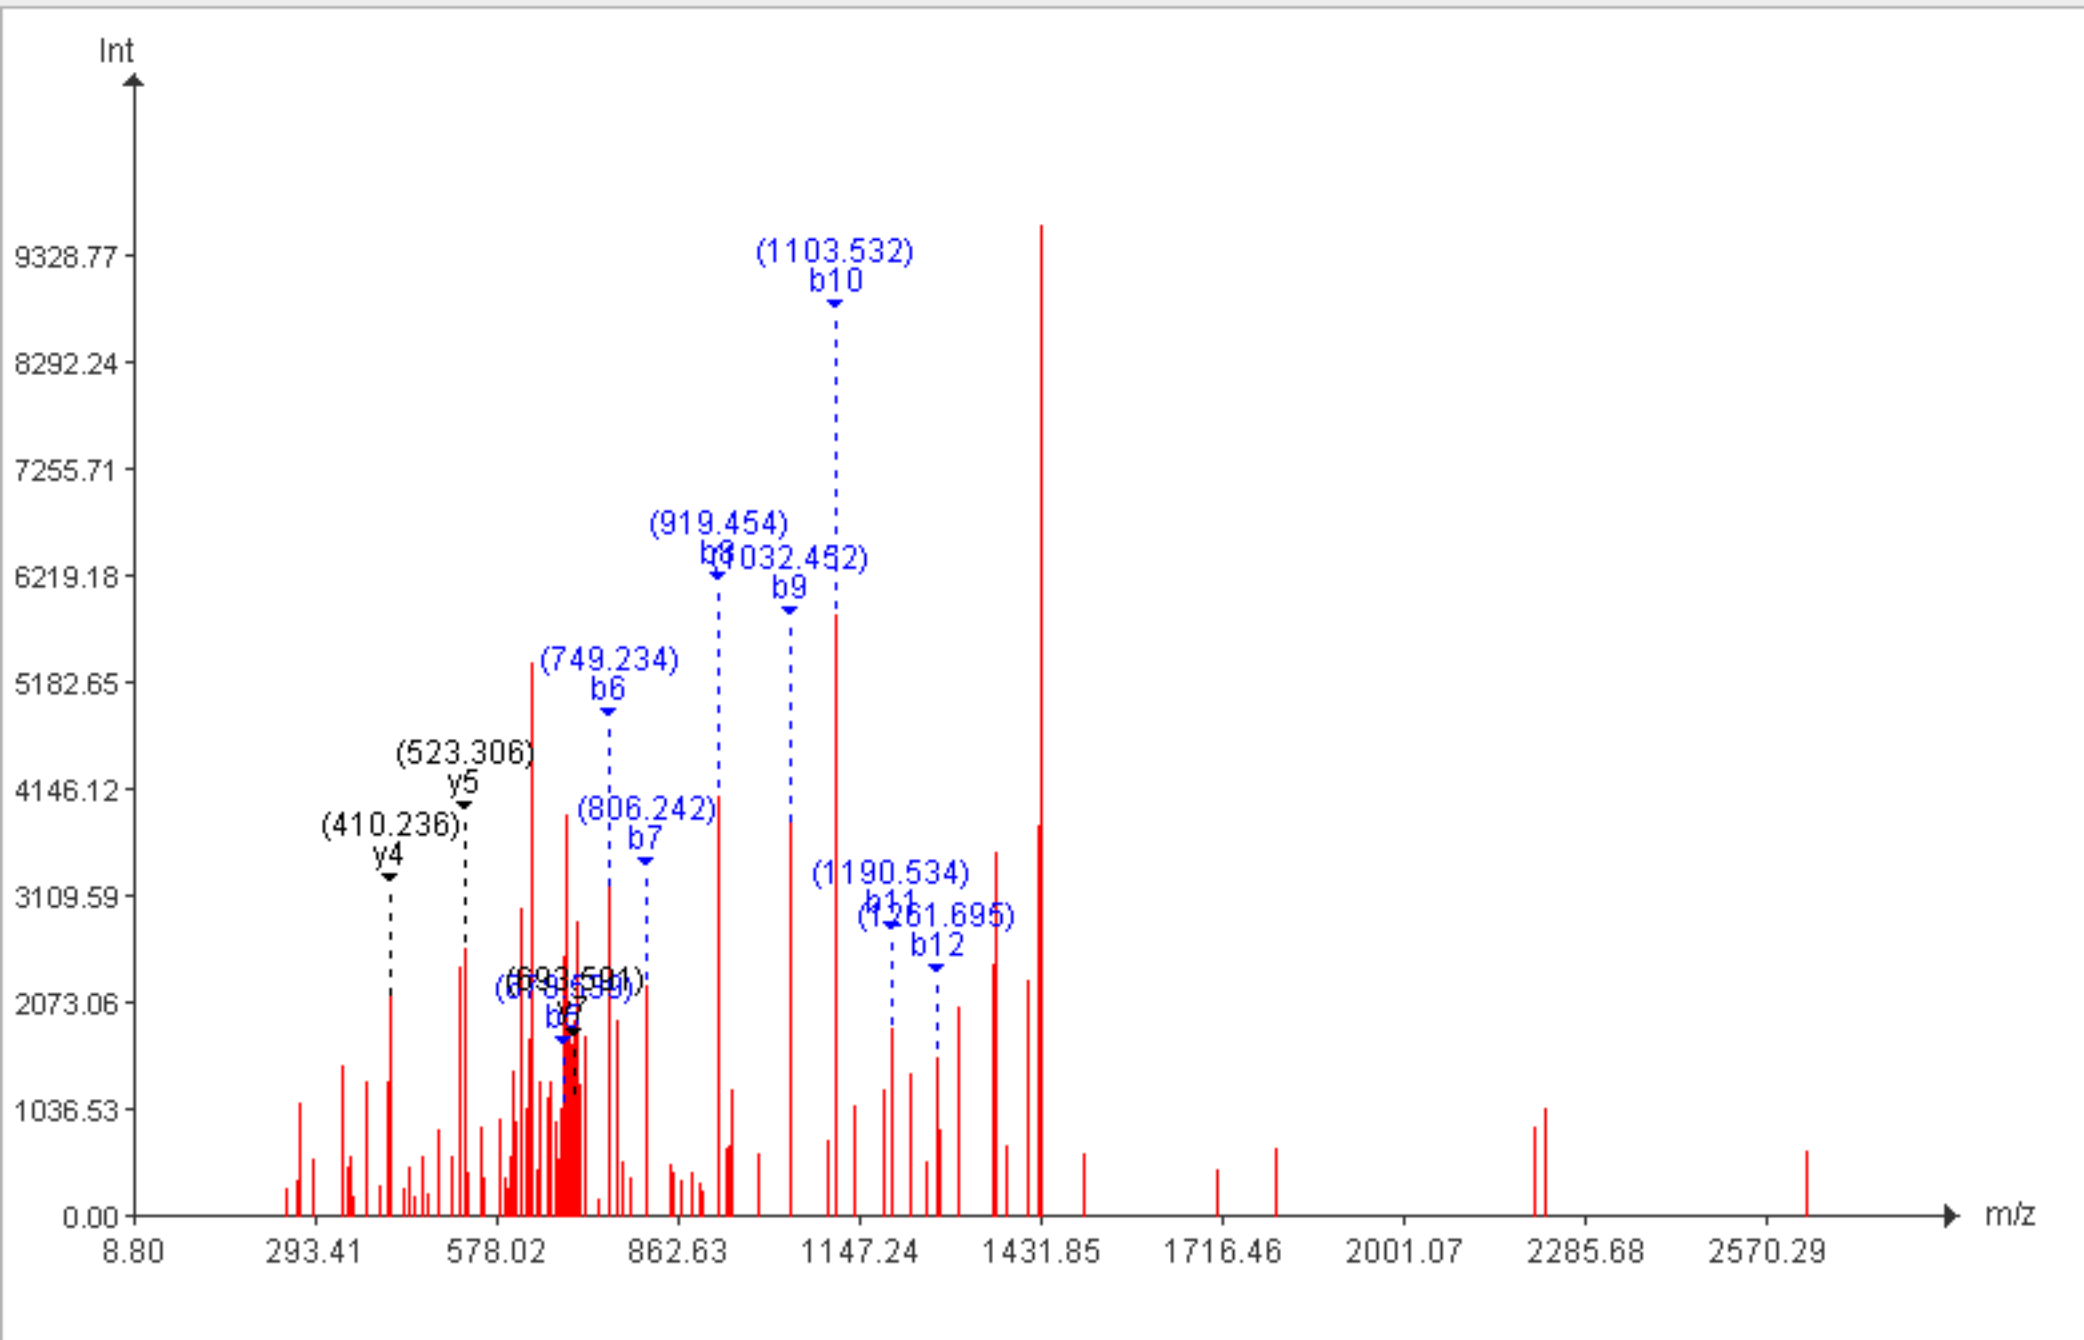

**AcD3-GVPDIAVGTK(AcD3K\*)R-COOH**  
**precursor mass: 658.3580 Da (charge: +2) protein: P17225 (3-14)**  
**score (threshold): 51.0 (31.0)**  
**instrument: Bruker Esquire HCT**

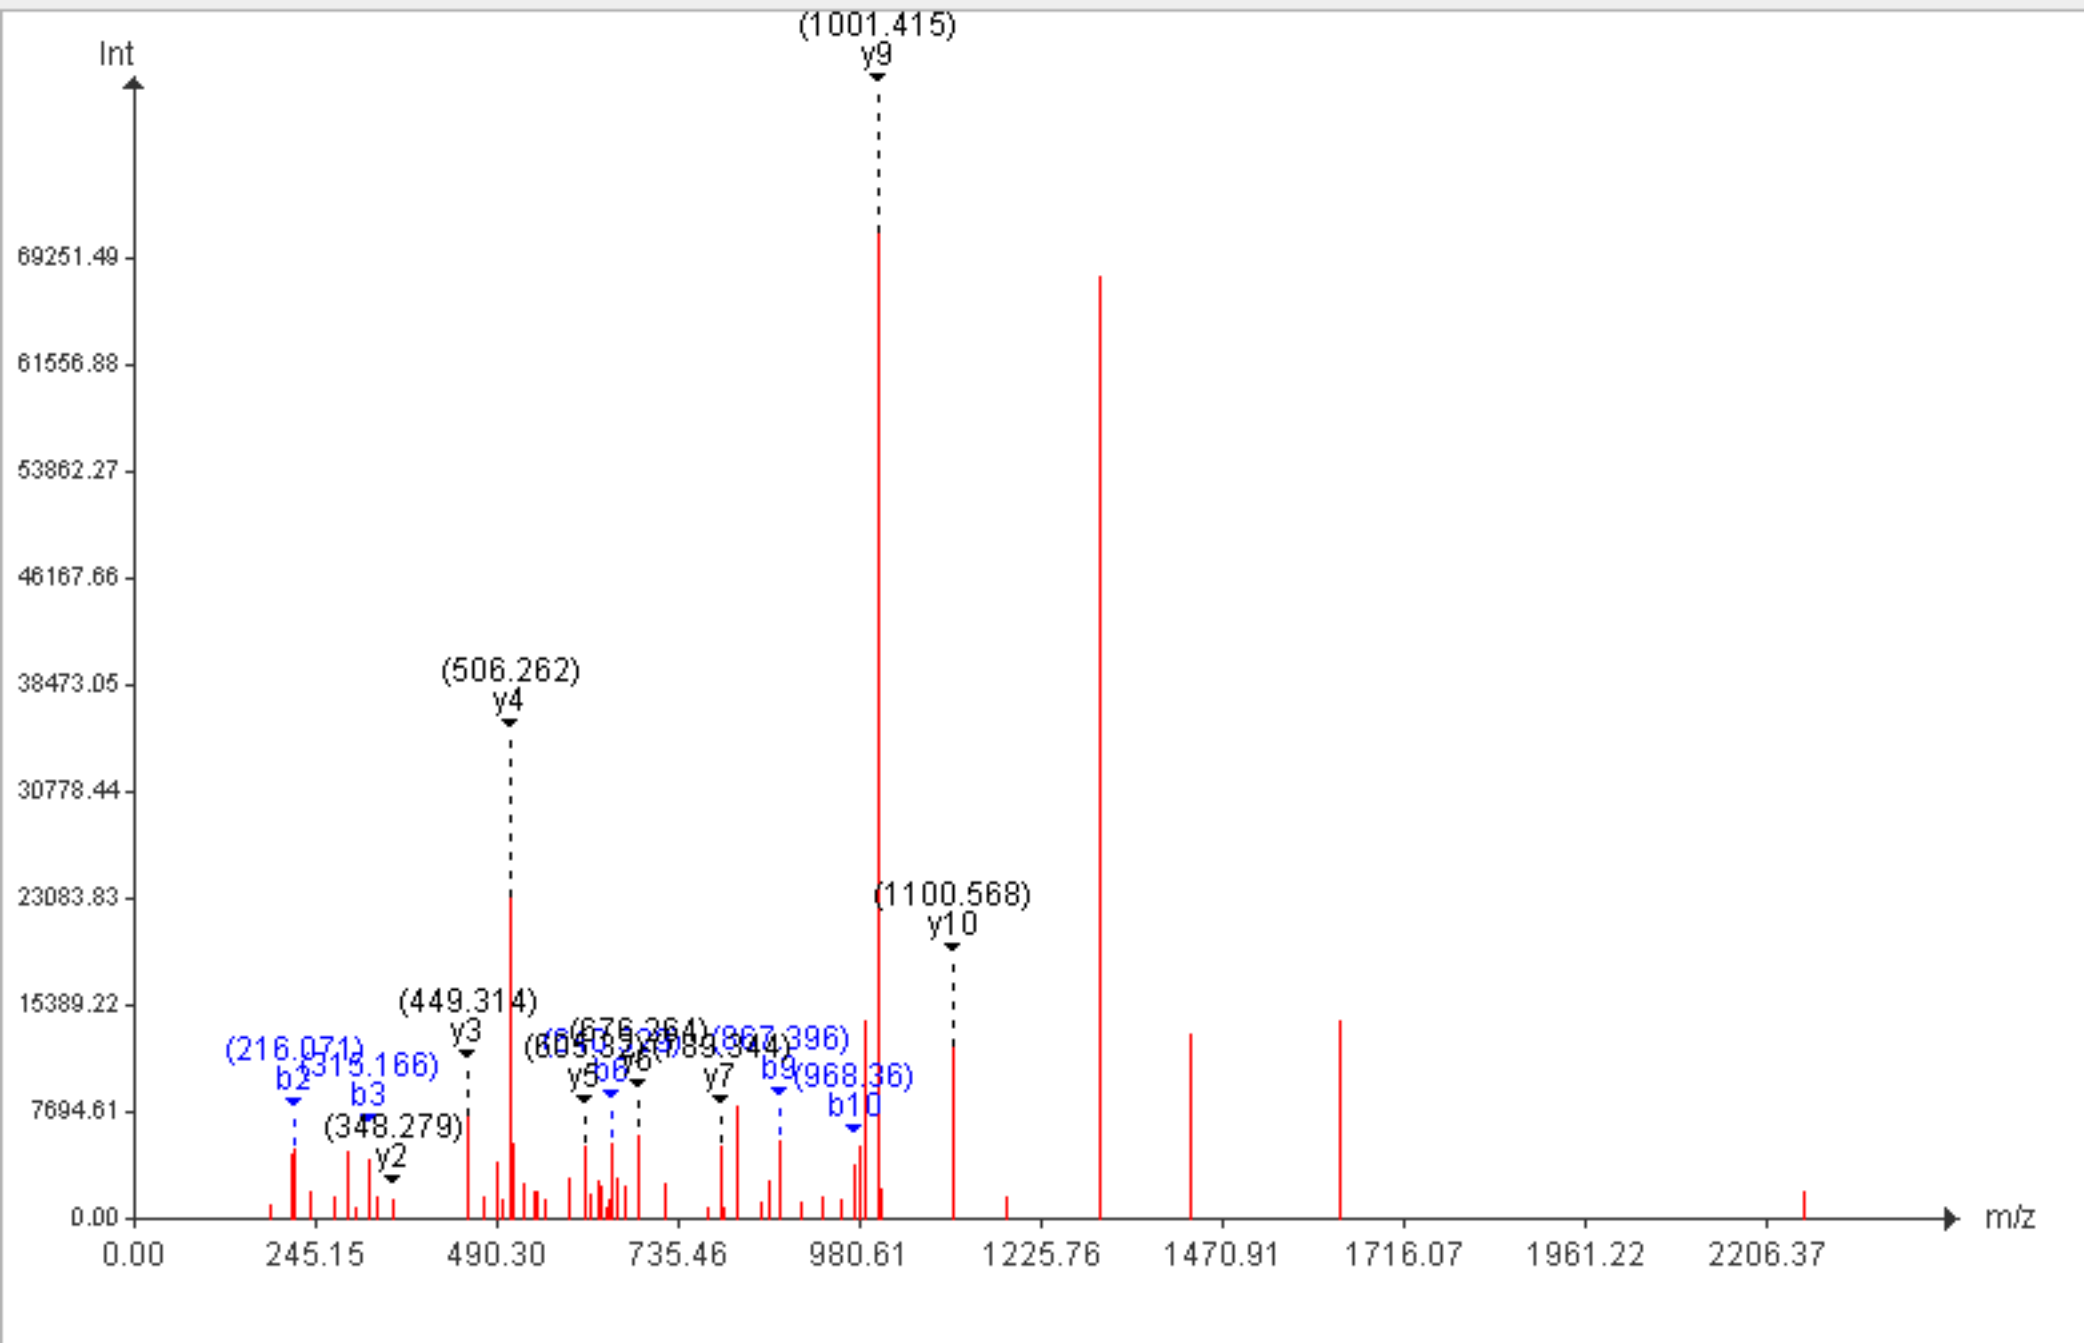

**AcD3-YAK(AcD3K\*)GFGGQYGIQK(AcD3K\*)DR-COOH**  
**precursor mass: 911.9110 Da (charge: +2) protein: P49710 (190-204)**  
**score (threshold): 85.0 (31.0)**  
**instrument: Bruker Esquire HCT**

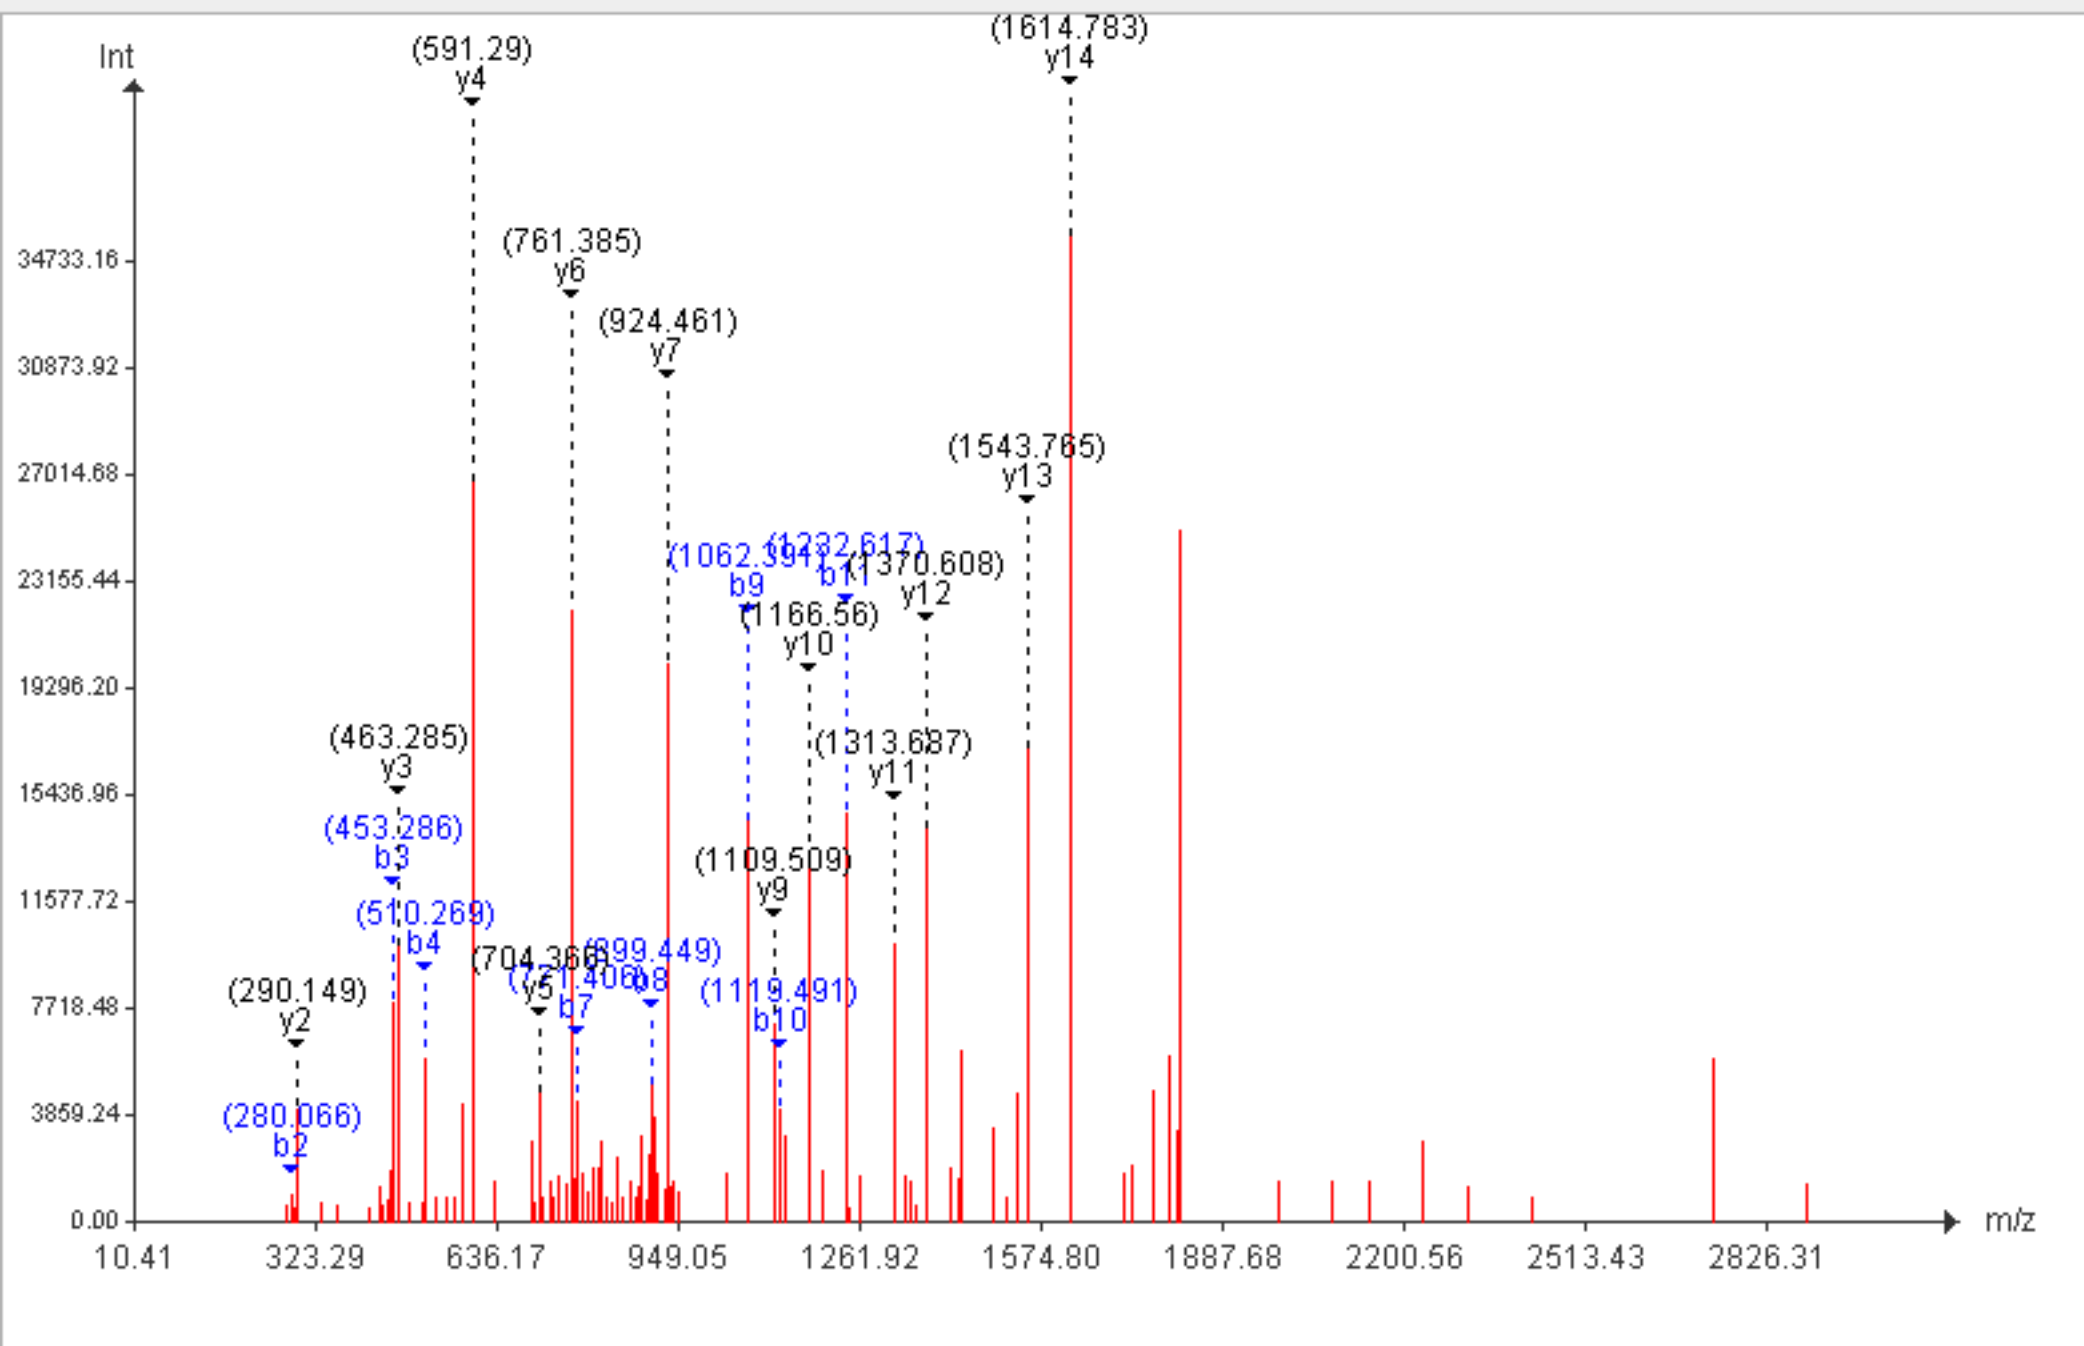

**AcD3-GQPGAFTC(Cmm\*)YLDAGLAR-COOH**

**precursor mass: 871.4260 Da (charge: +2) protein: P47962 (136-151)**

**score (threshold): 93.0 (31.0)**

**instrument: Bruker Esquire HCT**

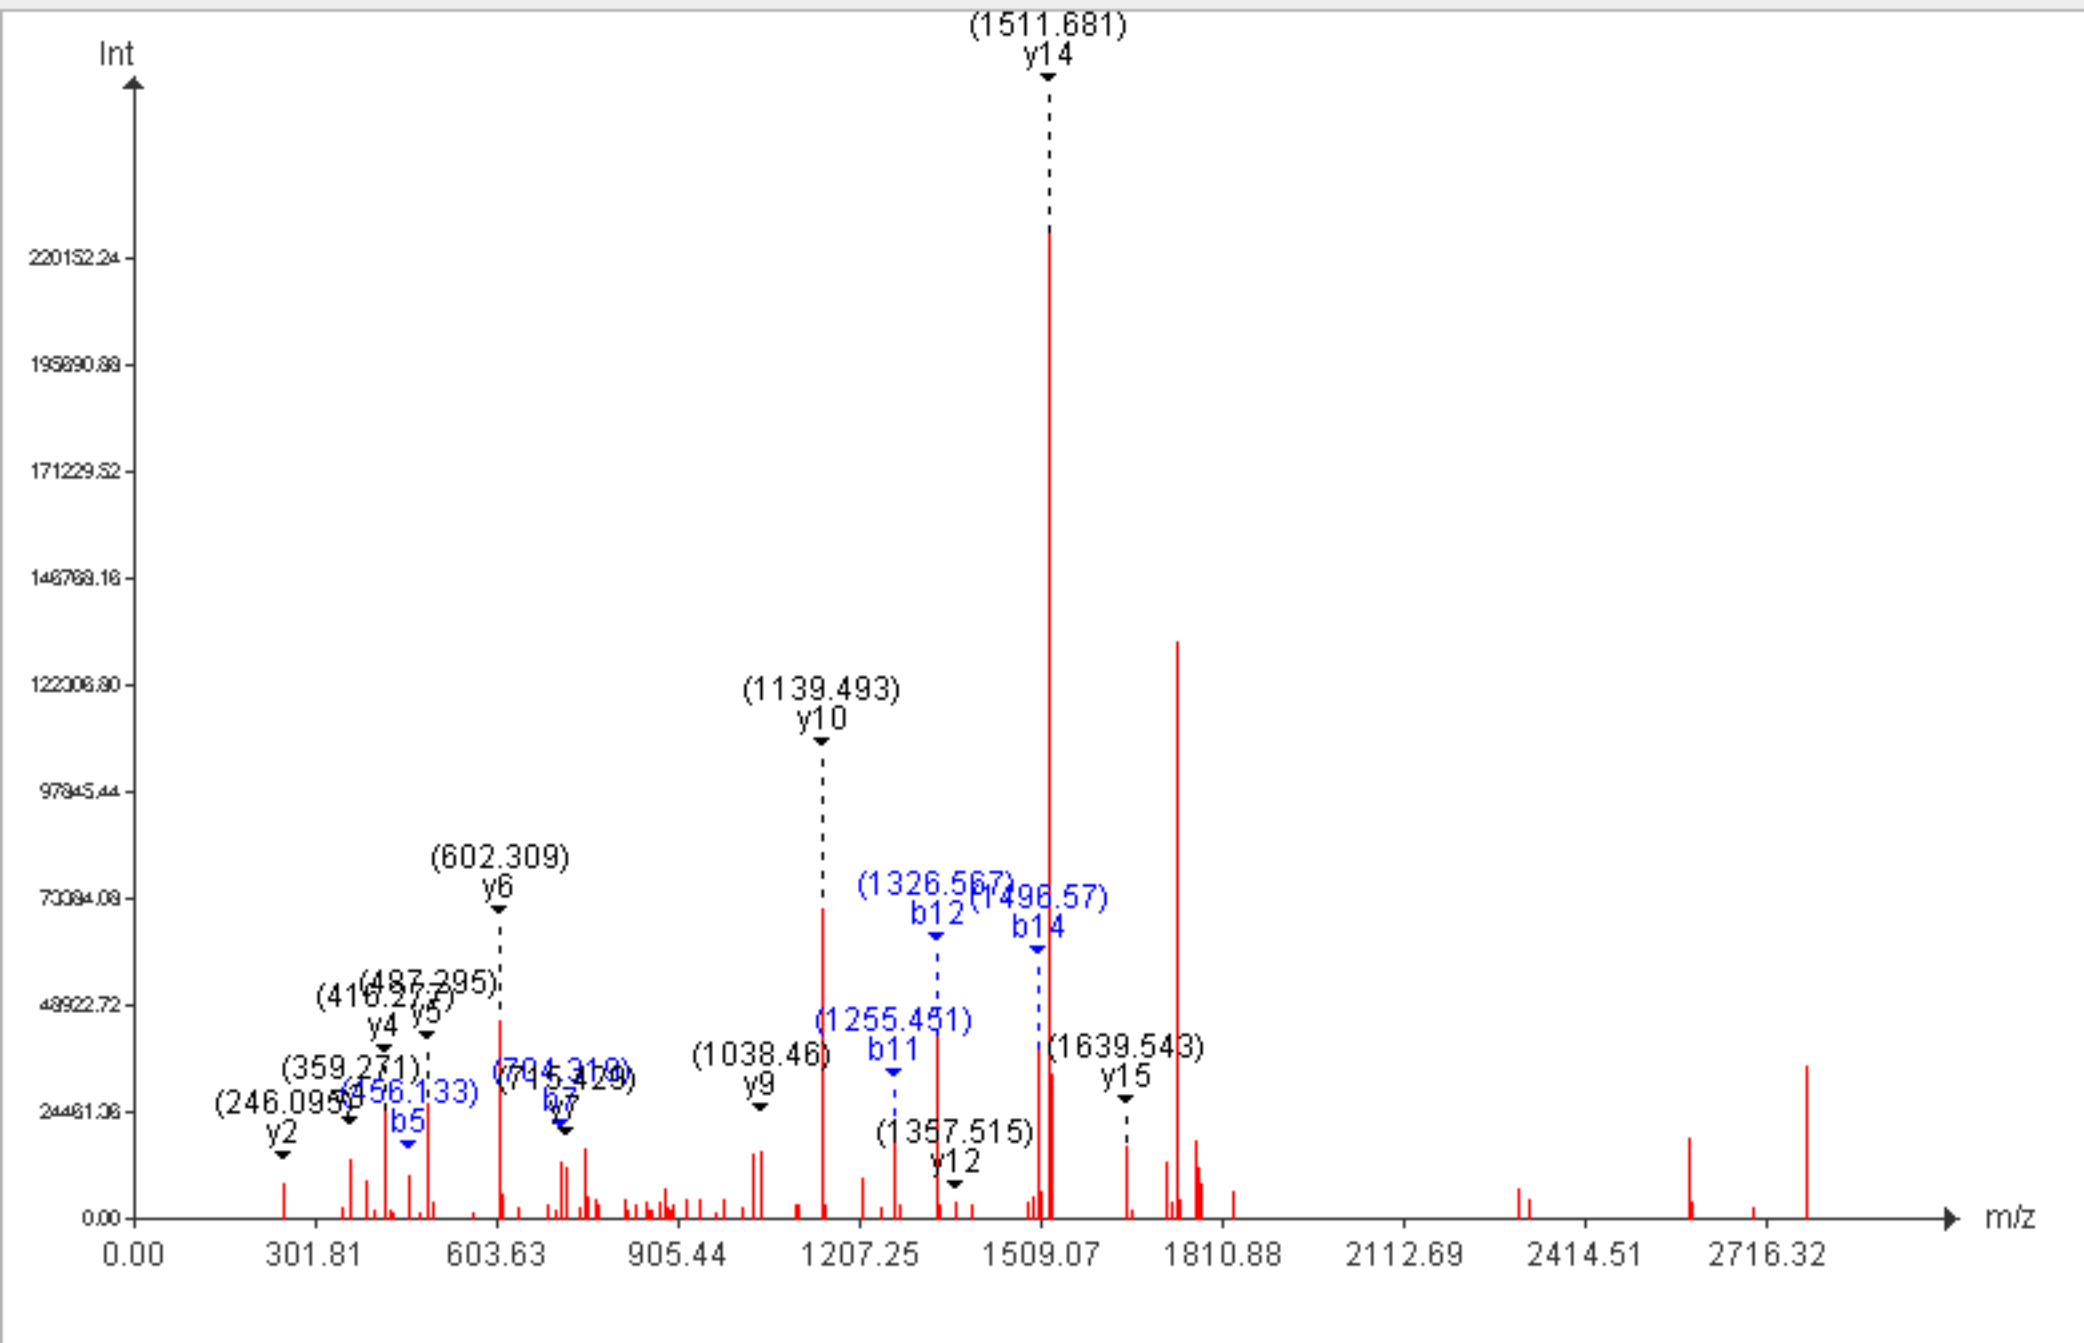

***AcD3-SLK(AcD3K\*)EALTYDGALLGDR-COOH***  
**precursor mass: 906.4180 Da (charge: +2) protein: Q9WUK2 (93-108)**  
**score (threshold): 67.0 (36.0)**  
**instrument: Bruker Esquire HCT**

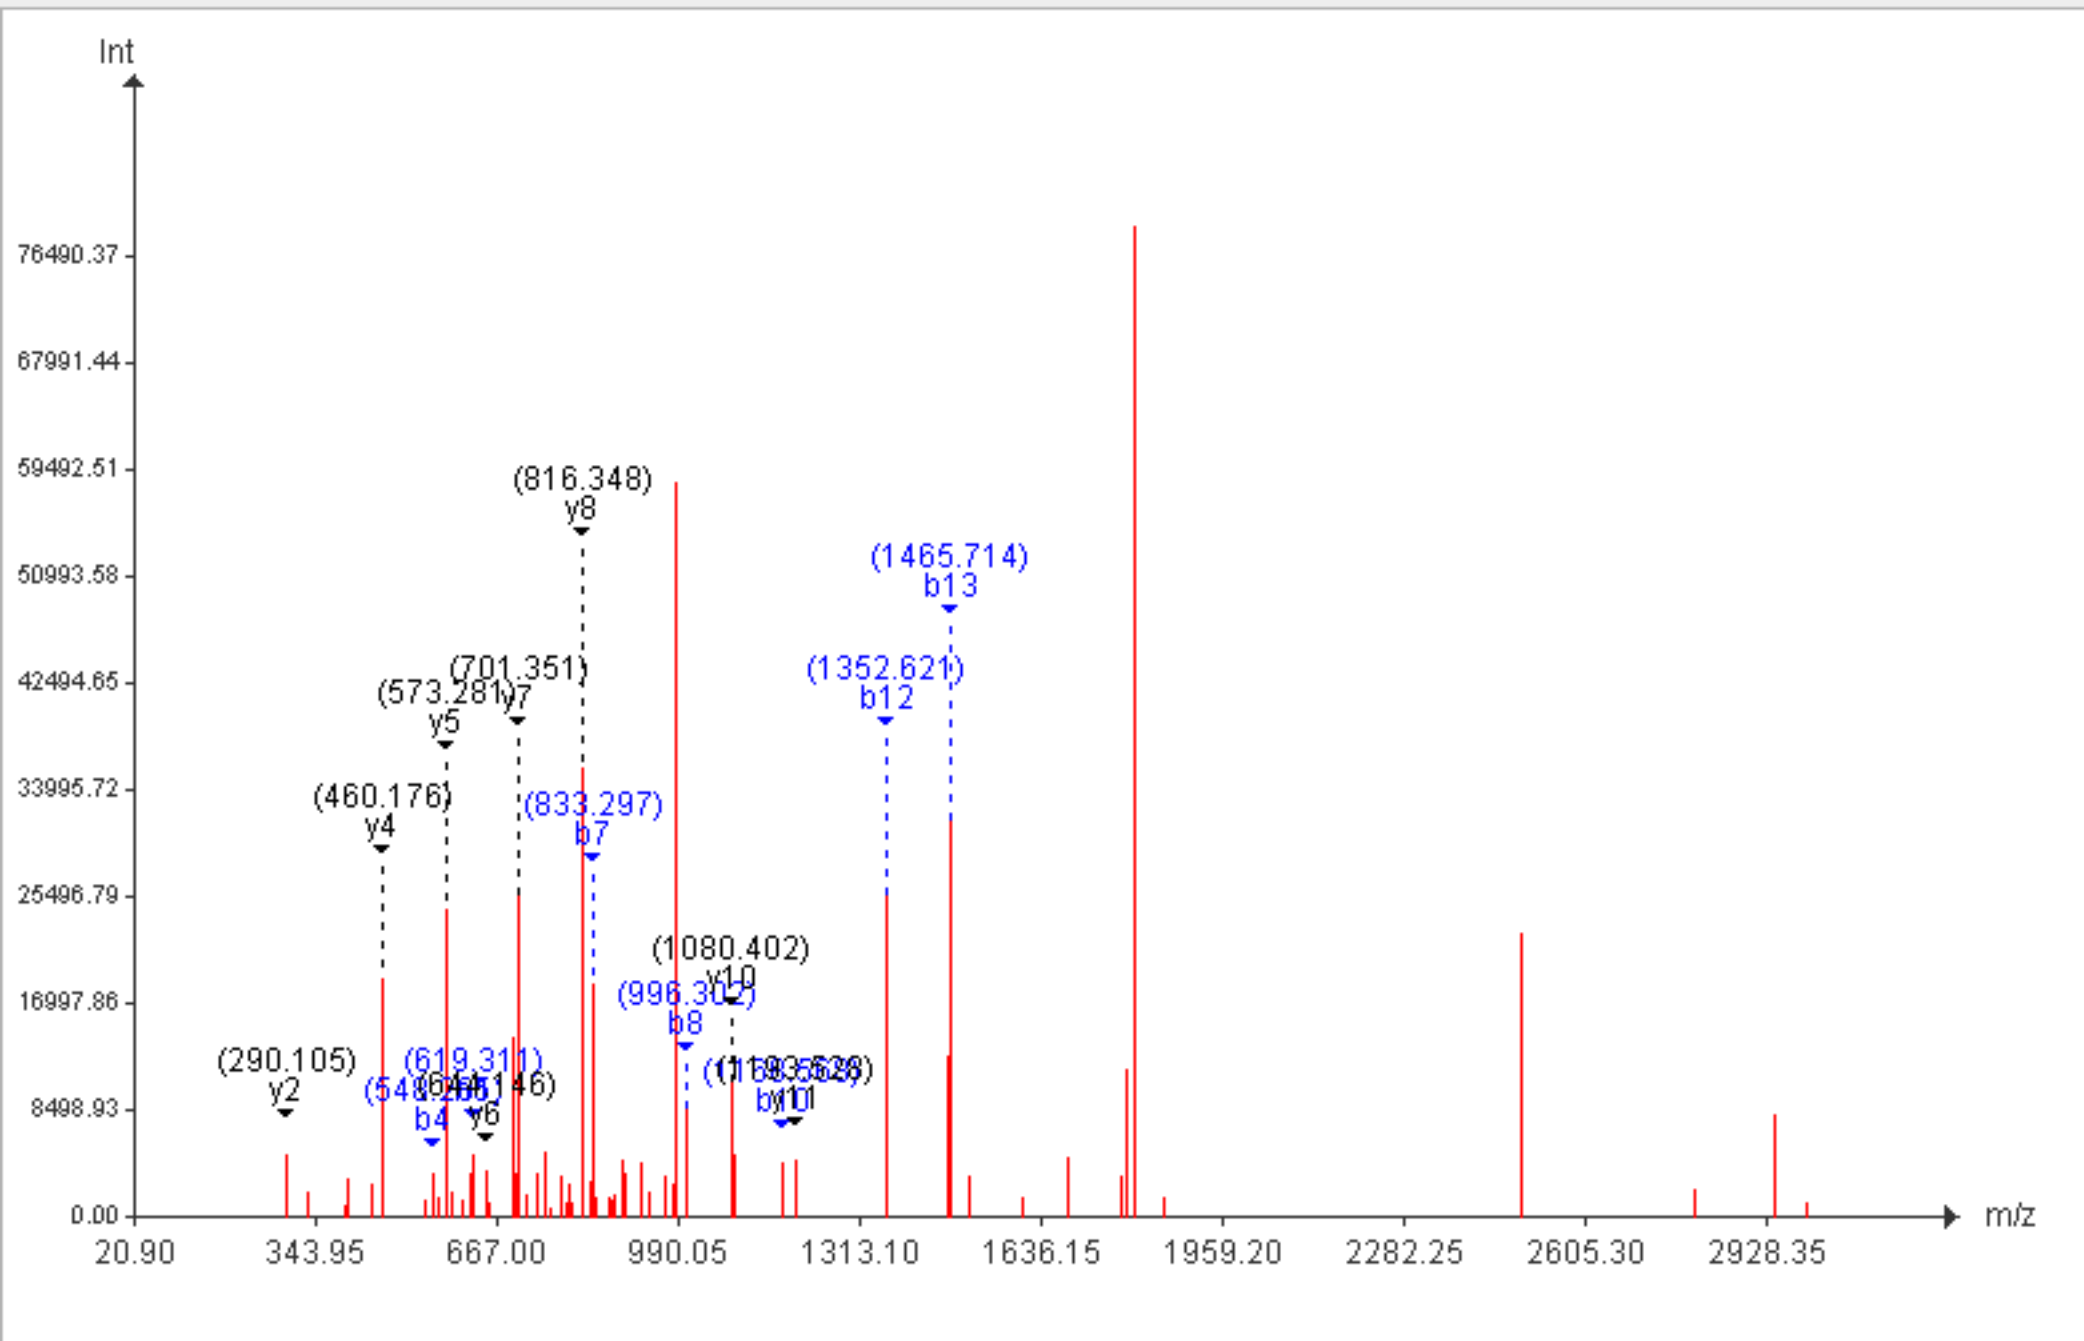



**AcD3-SQGPTPVC(Cmm\*)TPTFLER-COOH**  
**precursor mass: 867.9450 Da (charge: +2) protein: Q91VE6 (253-267)**  
**score (threshold): 32.0 (31.0)**  
**instrument: Bruker Esquire HCT**

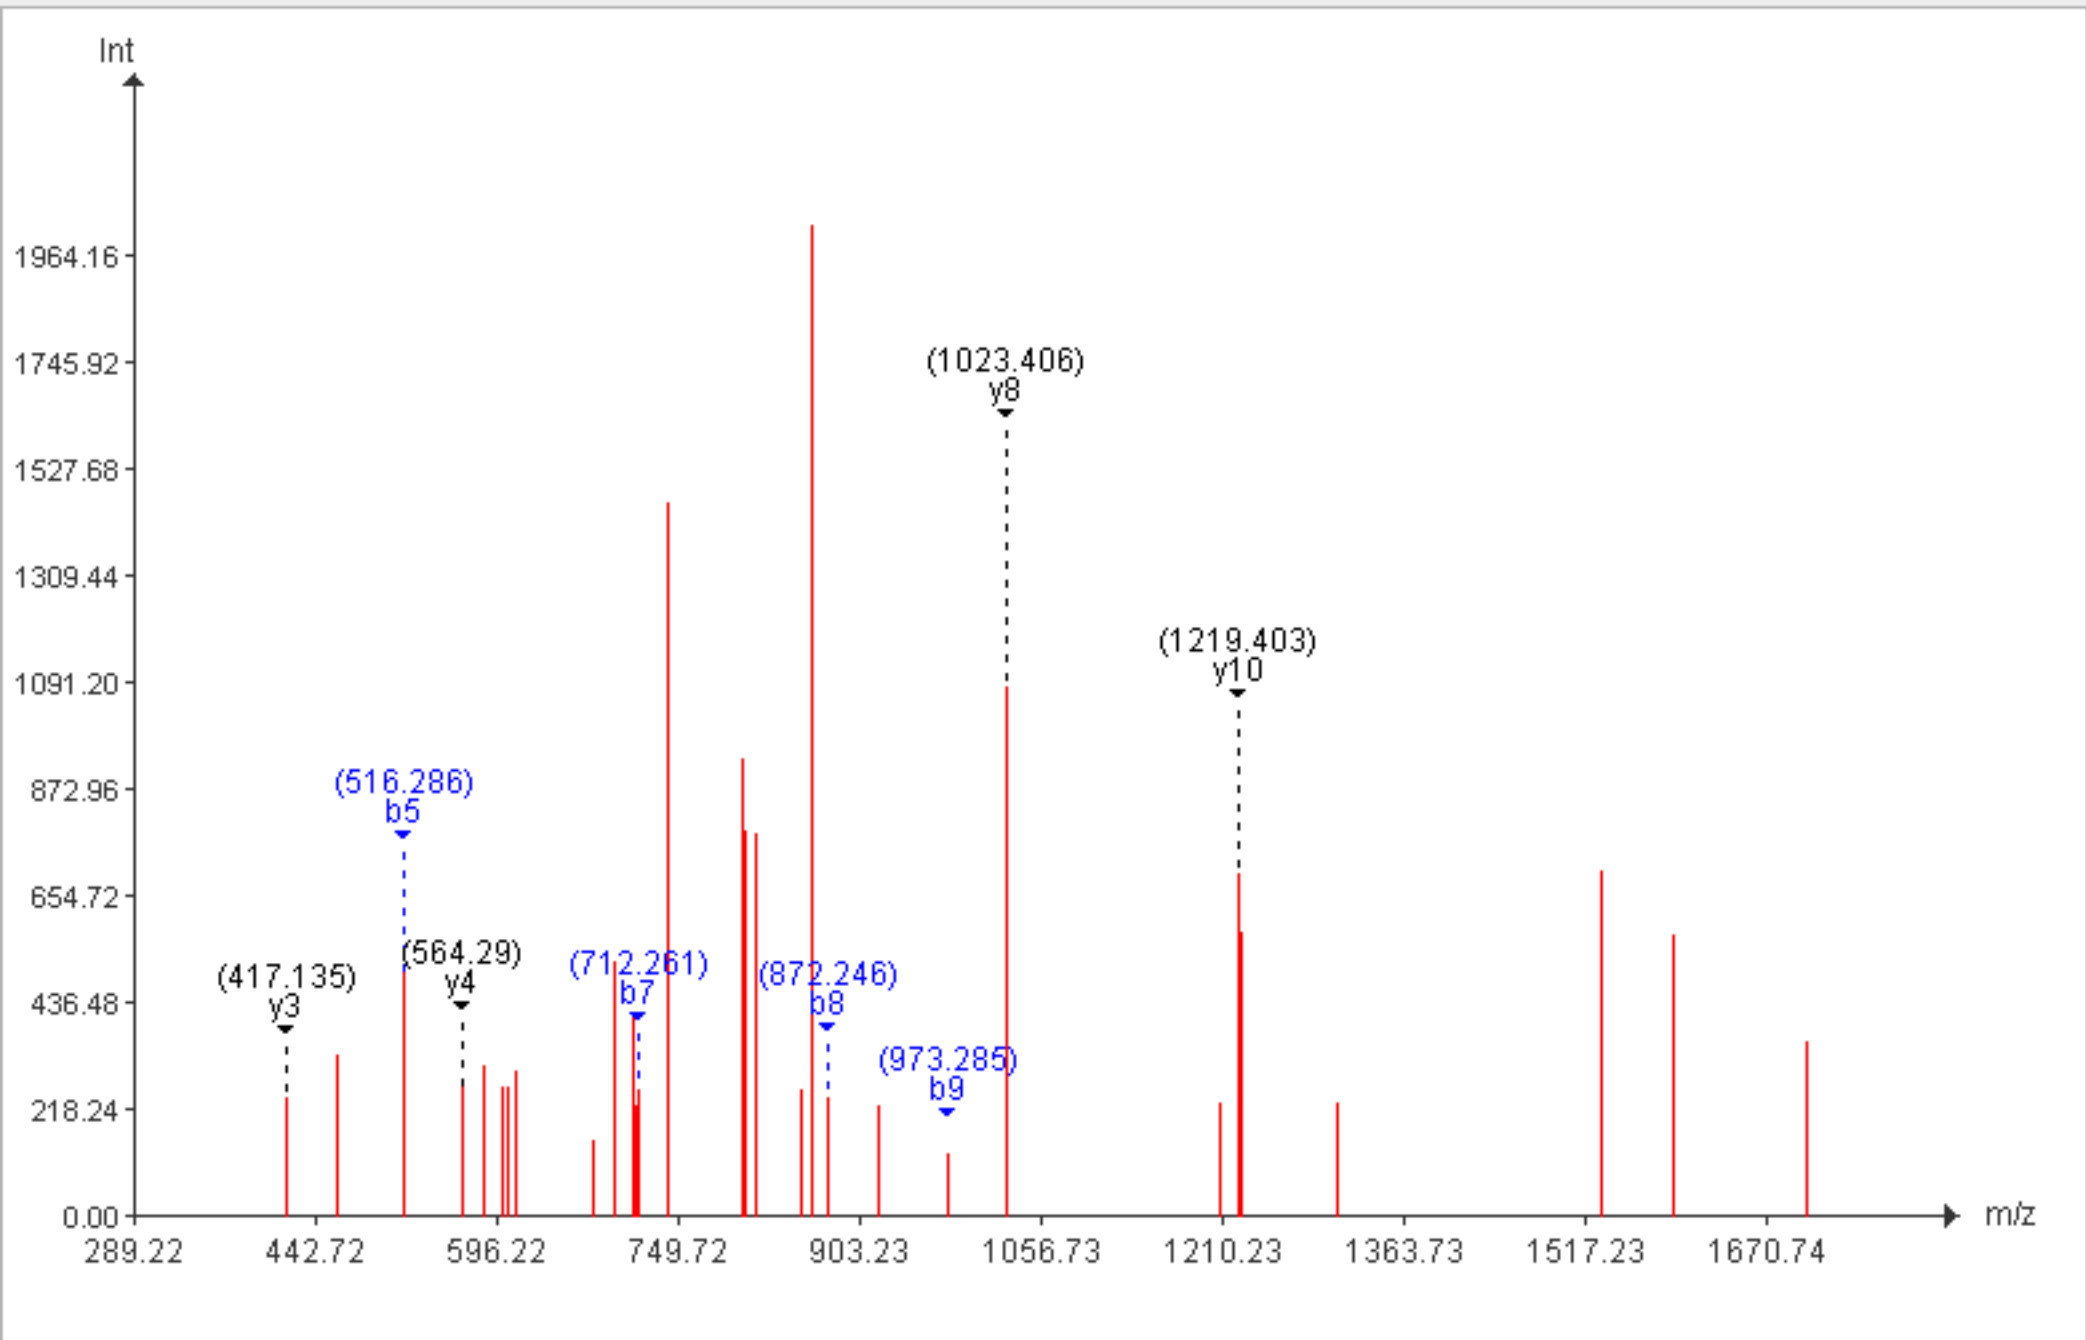

**AcD3-AVTEGAM(Mox)PAATGK(AcD3K\*)DQPPSTGK(AcD3K\*)K(AcD3K\*)K(AcD3K\*)R-COOH**

**precursor mass: 889.9320 Da (charge: +3) protein: Q7TPV4 (1202-1225)**

**score (threshold): 41.0 (36.0)**

**instrument: Bruker Esquire HCT**

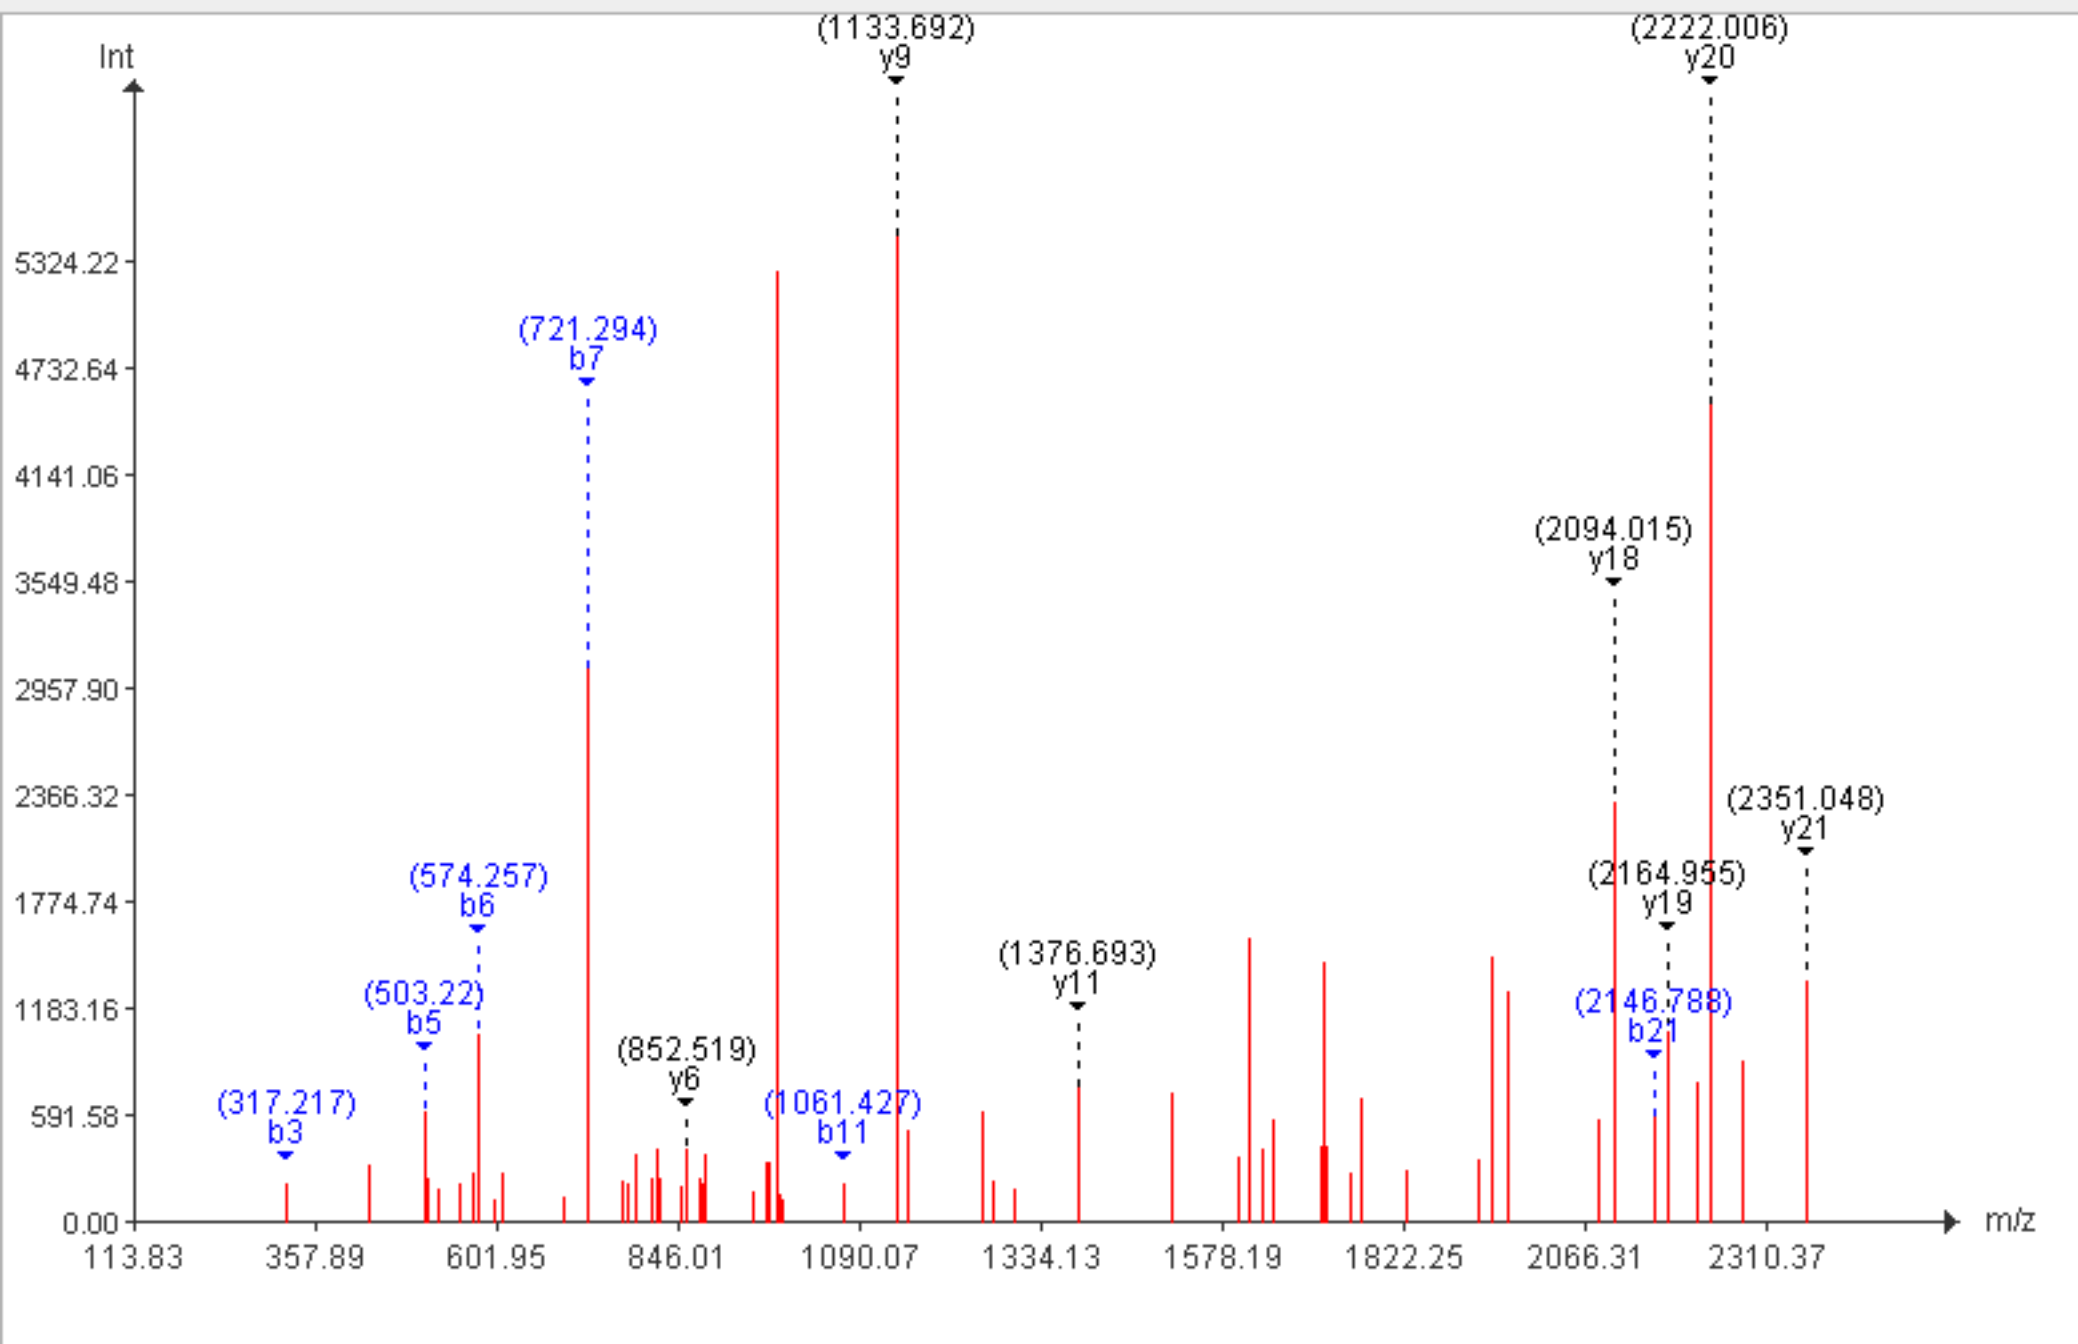

***AcD3-NTEEK(AcD3K\*)K(AcD3K\*)SGLSVR-COOH***  
**precursor mass: 741.8880 Da (charge: +2) protein: Q923D5 (298-309)**  
**score (threshold): 67.0 (31.0)**  
**instrument: Bruker Esquire HCT**

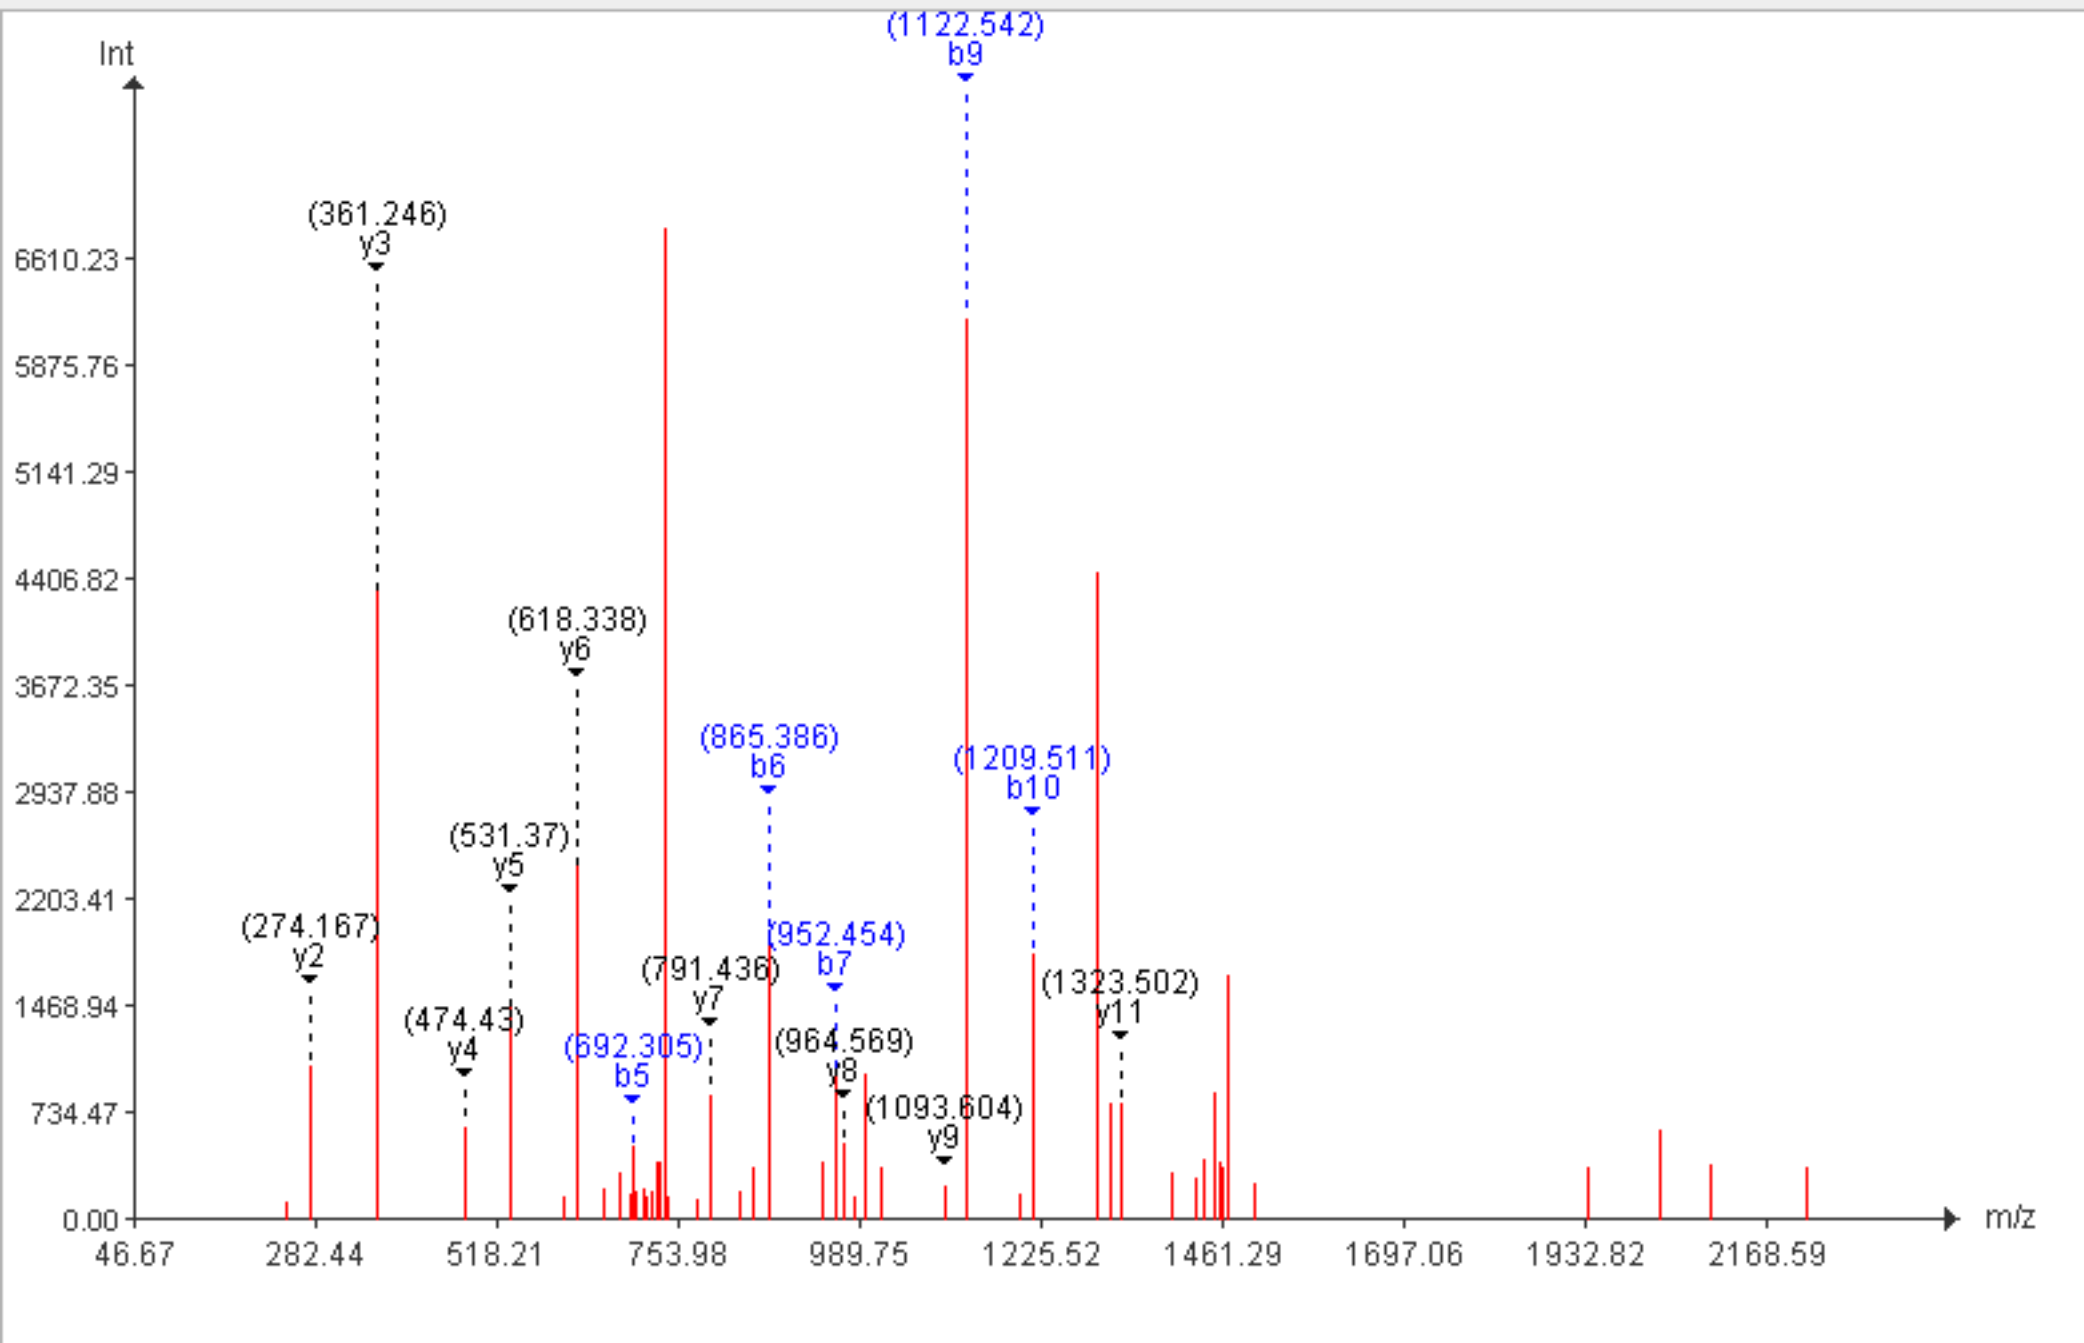

**AcD3-VDGTVVEEDLGK(AcD3K\*)SR(C13\*)-COOH**  
**precursor mass: 750.7710 Da (charge: +2) protein: P08113 (27-39)**  
**score (threshold): 45.0 (36.0)**  
**instrument: Bruker Esquire HCT**

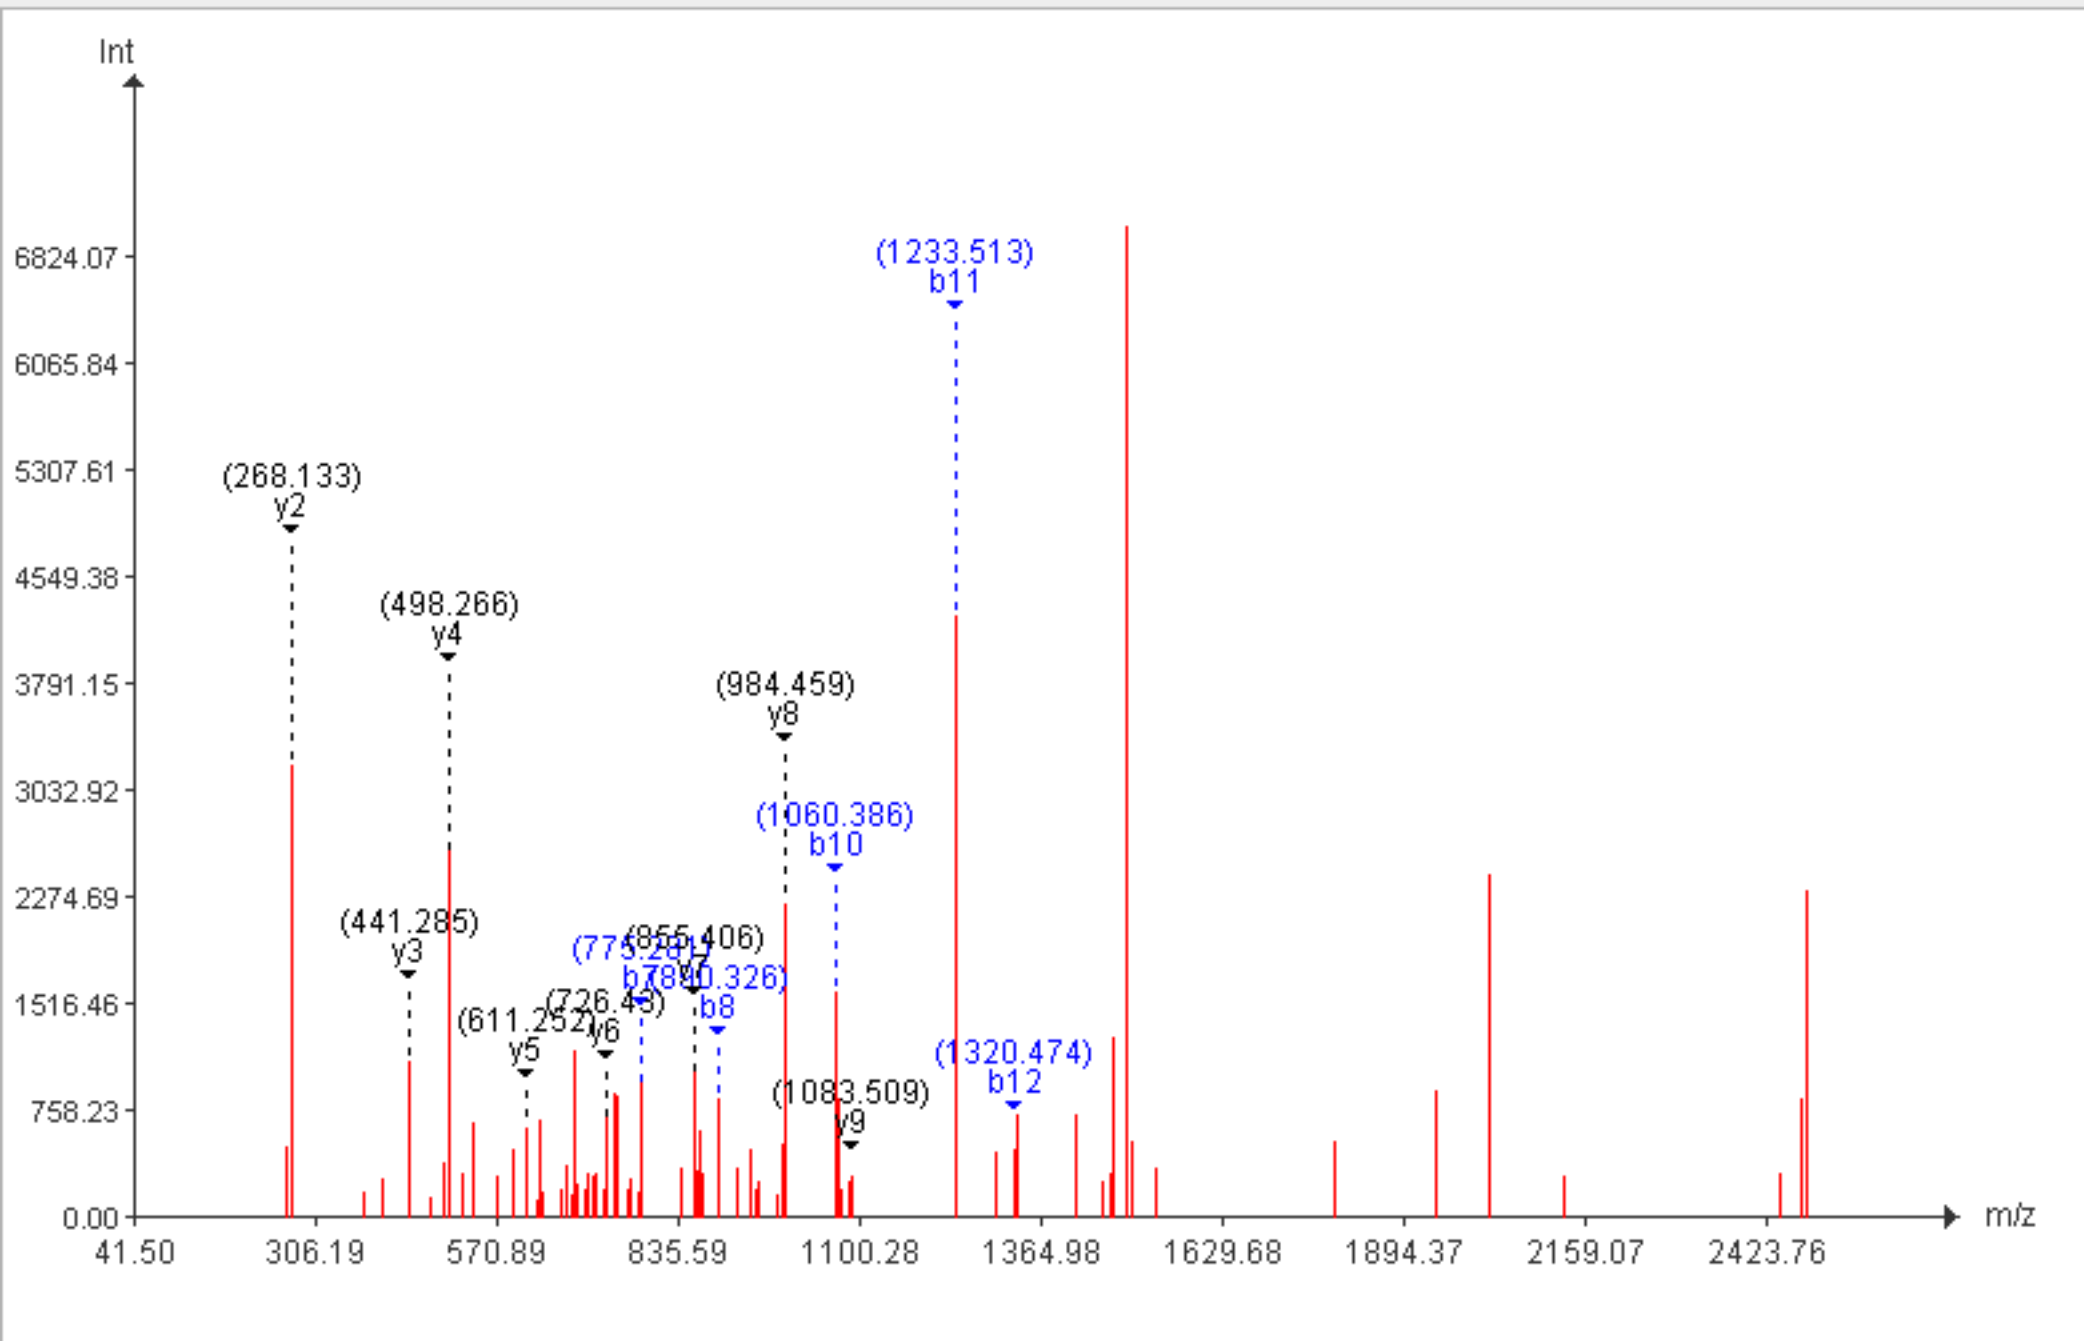

**AcD3-GK(AcD3K\*)VESIM(Mox)K(AcD3K\*)R-COOH**  
**precursor mass: 599.8750 Da (charge: +2) protein: IPI00007682.2 (300-308)**  
**score (threshold): 63.0 (34.0)**  
**instrument: Bruker Esquire HCT**

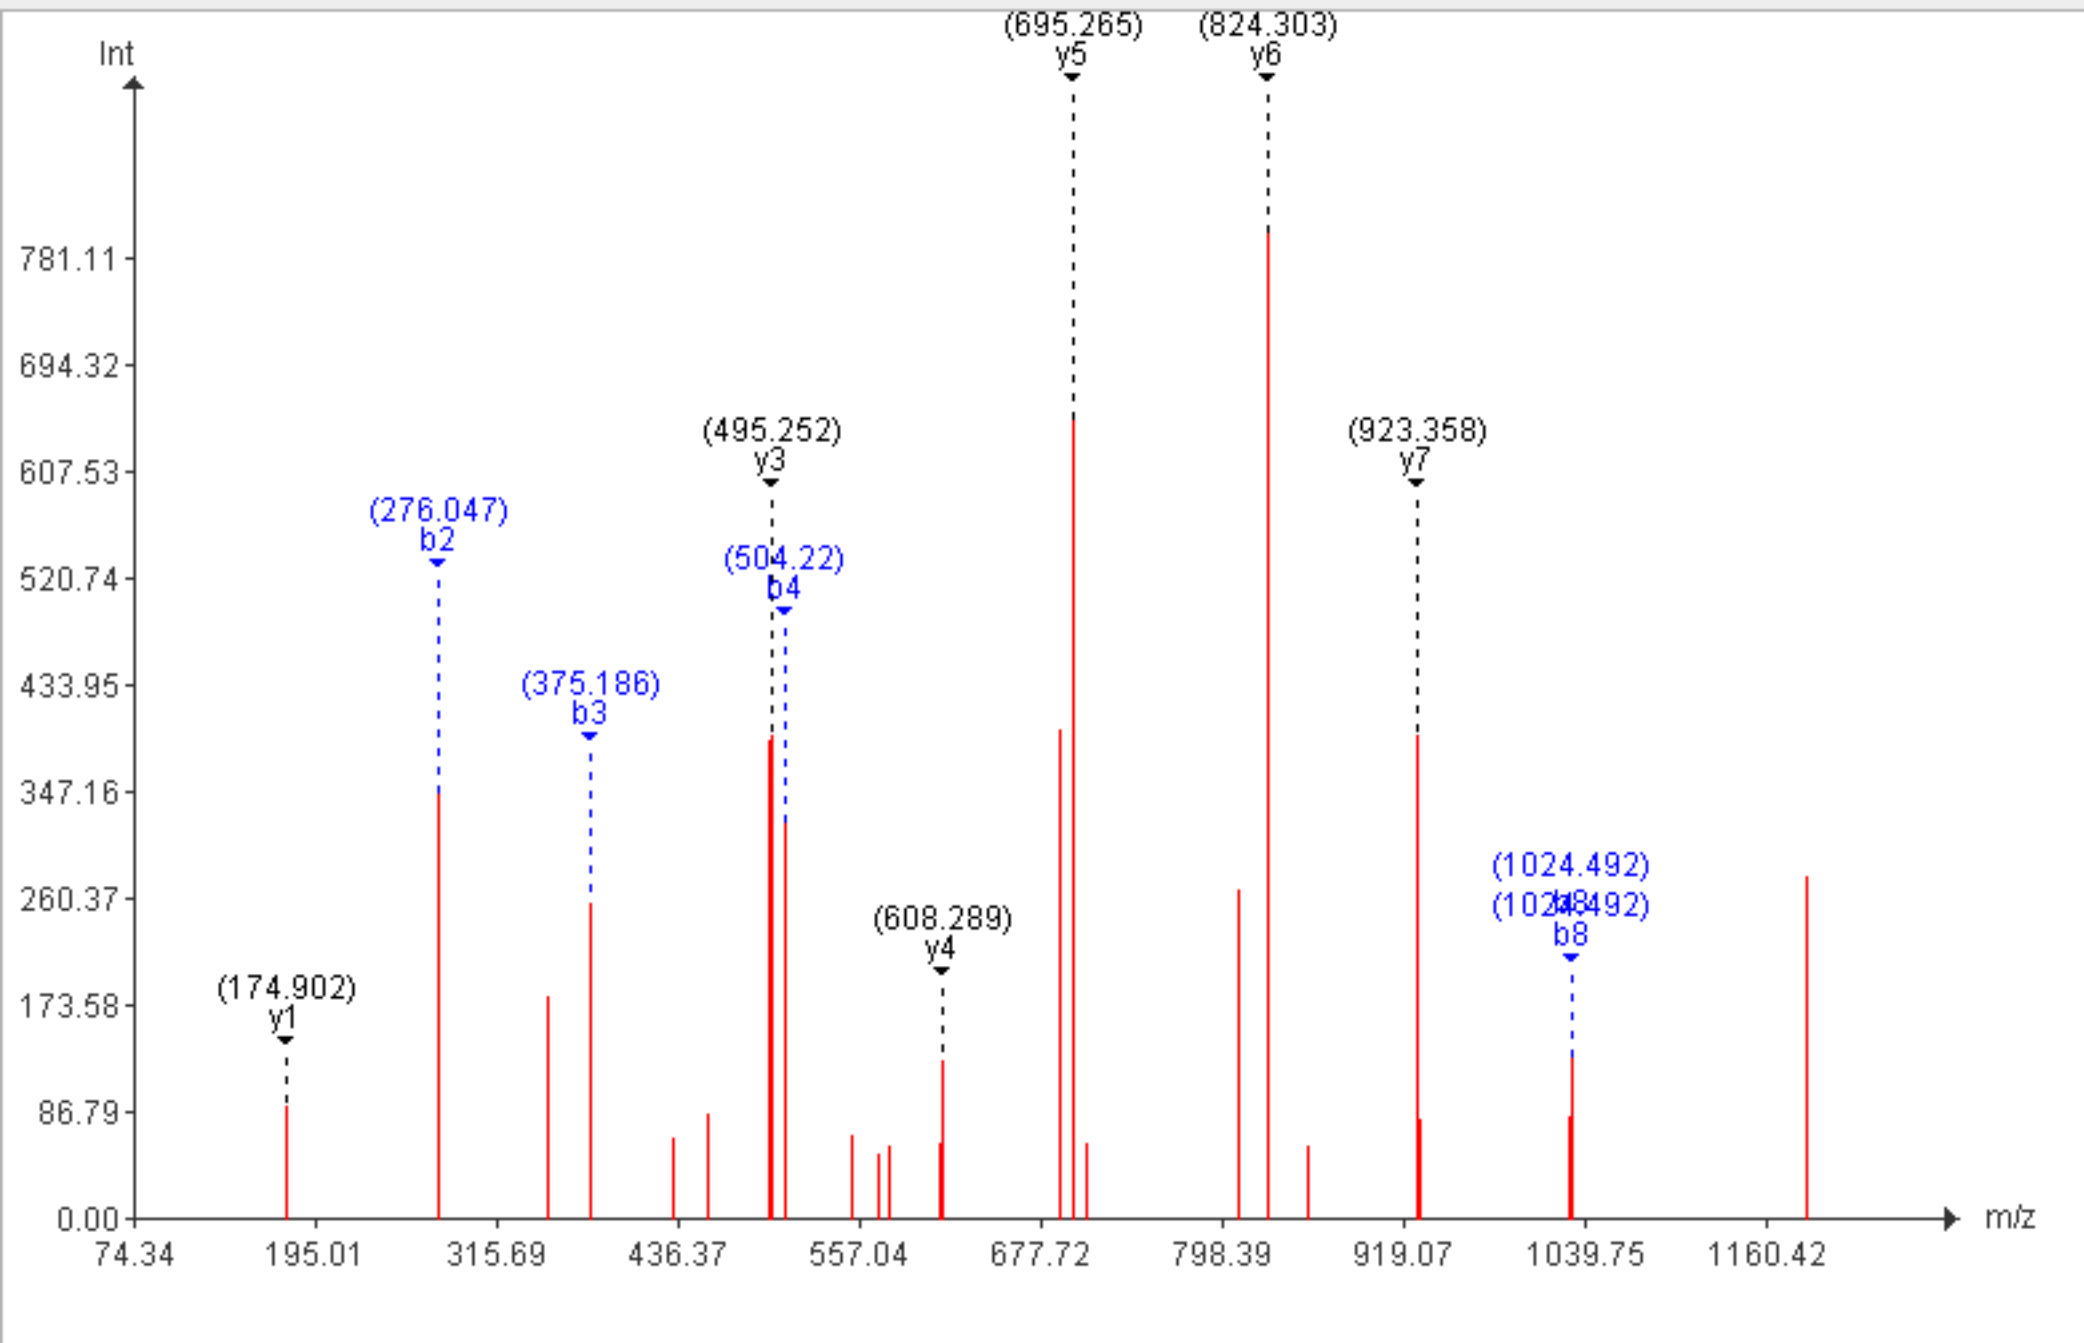

**AcD3-GK(AcD3K\*)GVVVVM(Mox)K(AcD3K\*)R-COOH**  
**precursor mass: 612.3510 Da (charge: +2) protein: P41105 (56-65)**  
**score (threshold): 55.0 (31.0)**  
**instrument: Bruker Esquire HCT**

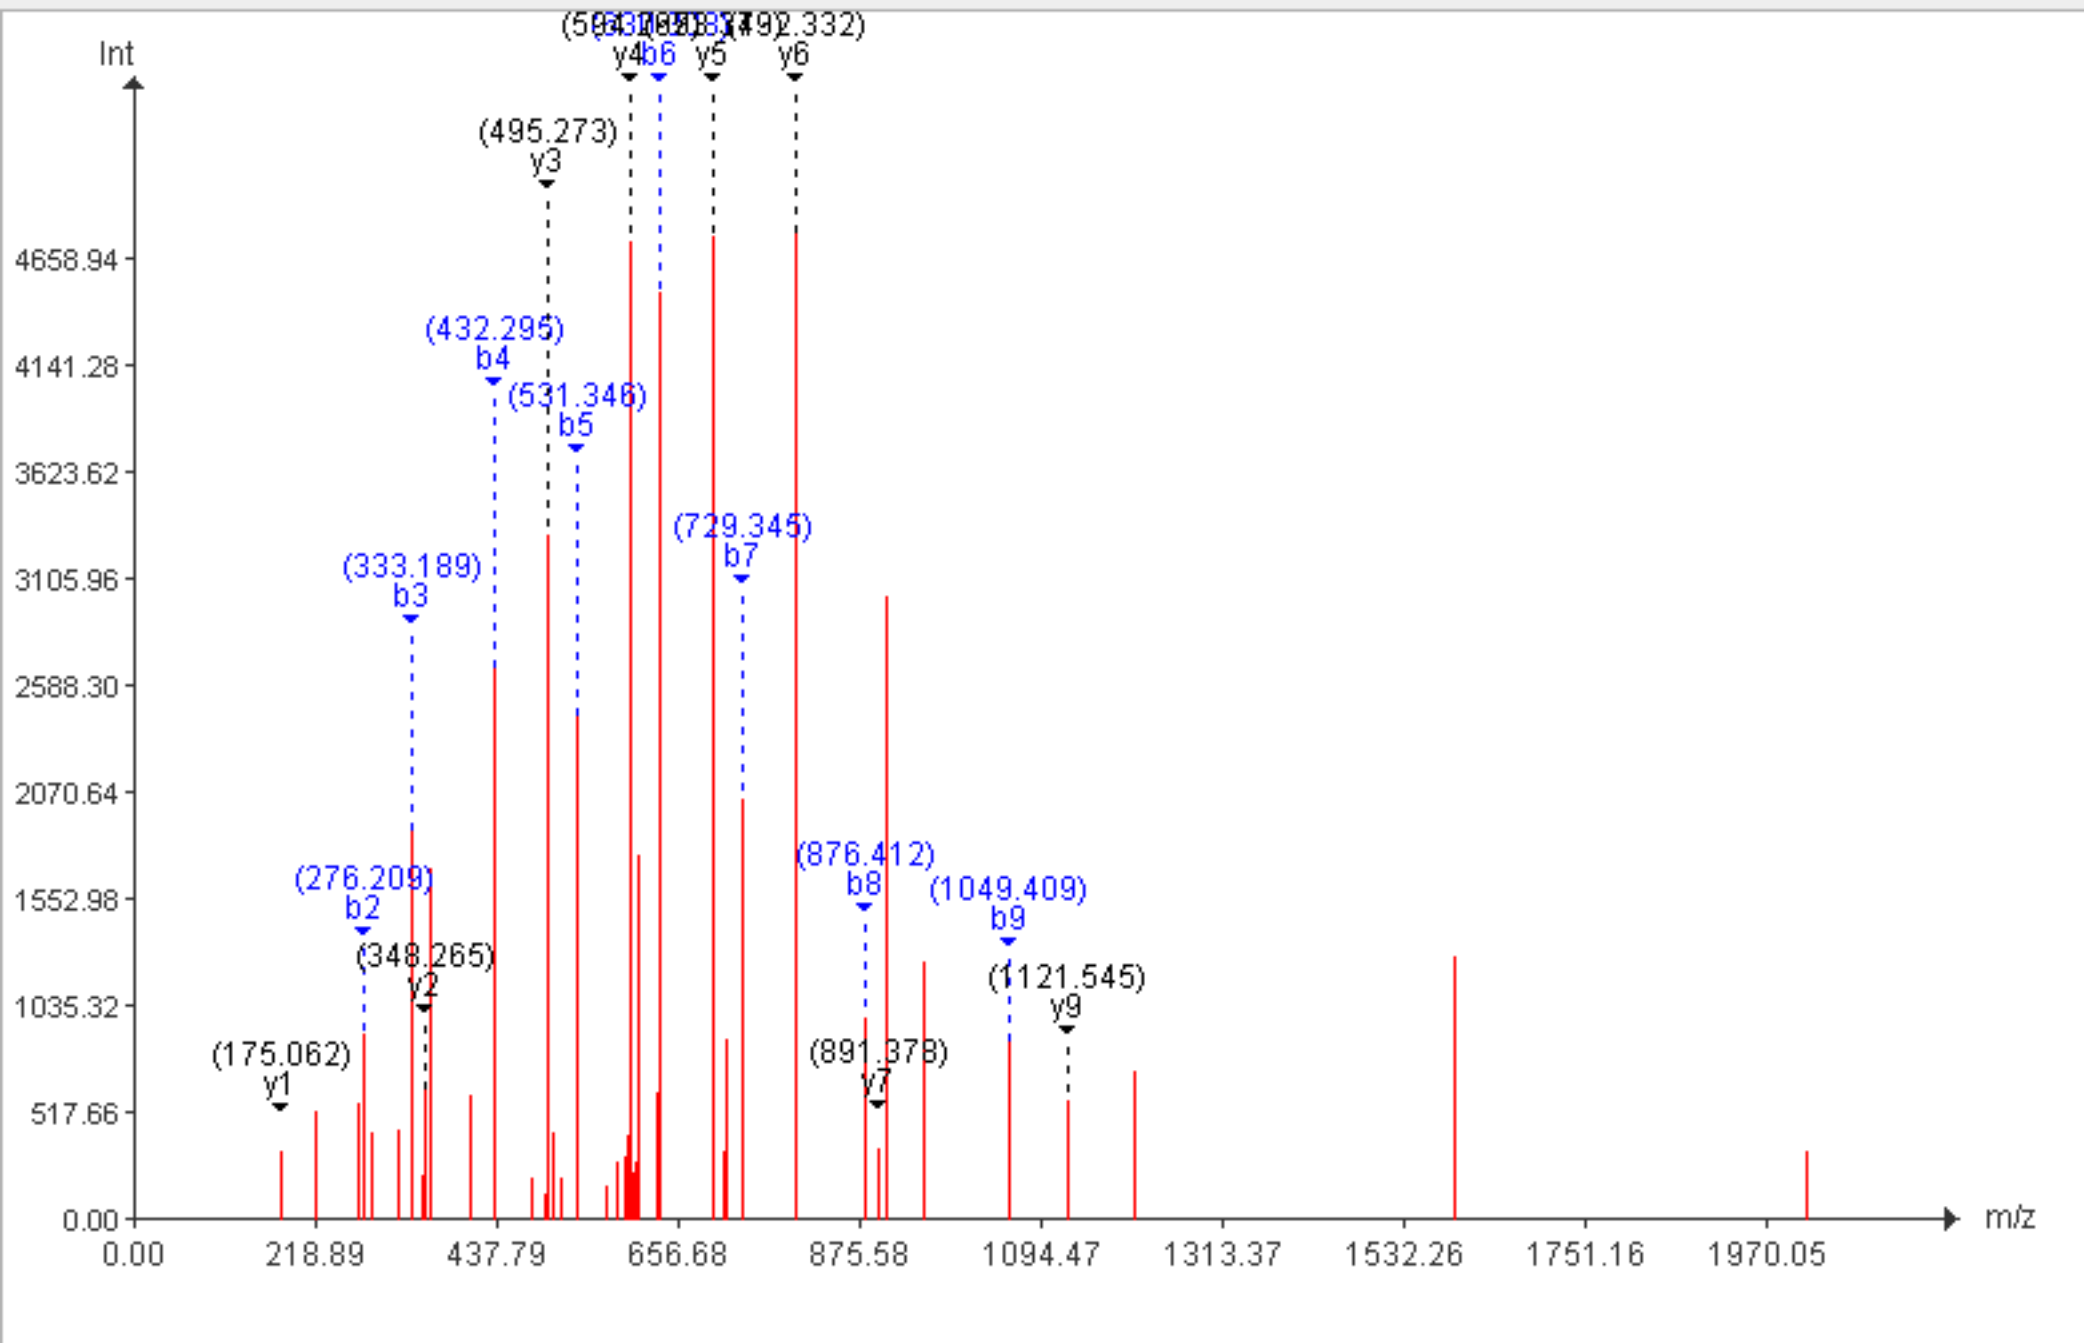

**AcD3-AAVADPDEFER-COOH**

**precursor mass: 632.7740 Da (charge: +2) protein: P47713 (522-532)**

**score (threshold): 32.0 (31.0)**

**instrument: Bruker Esquire HCT**

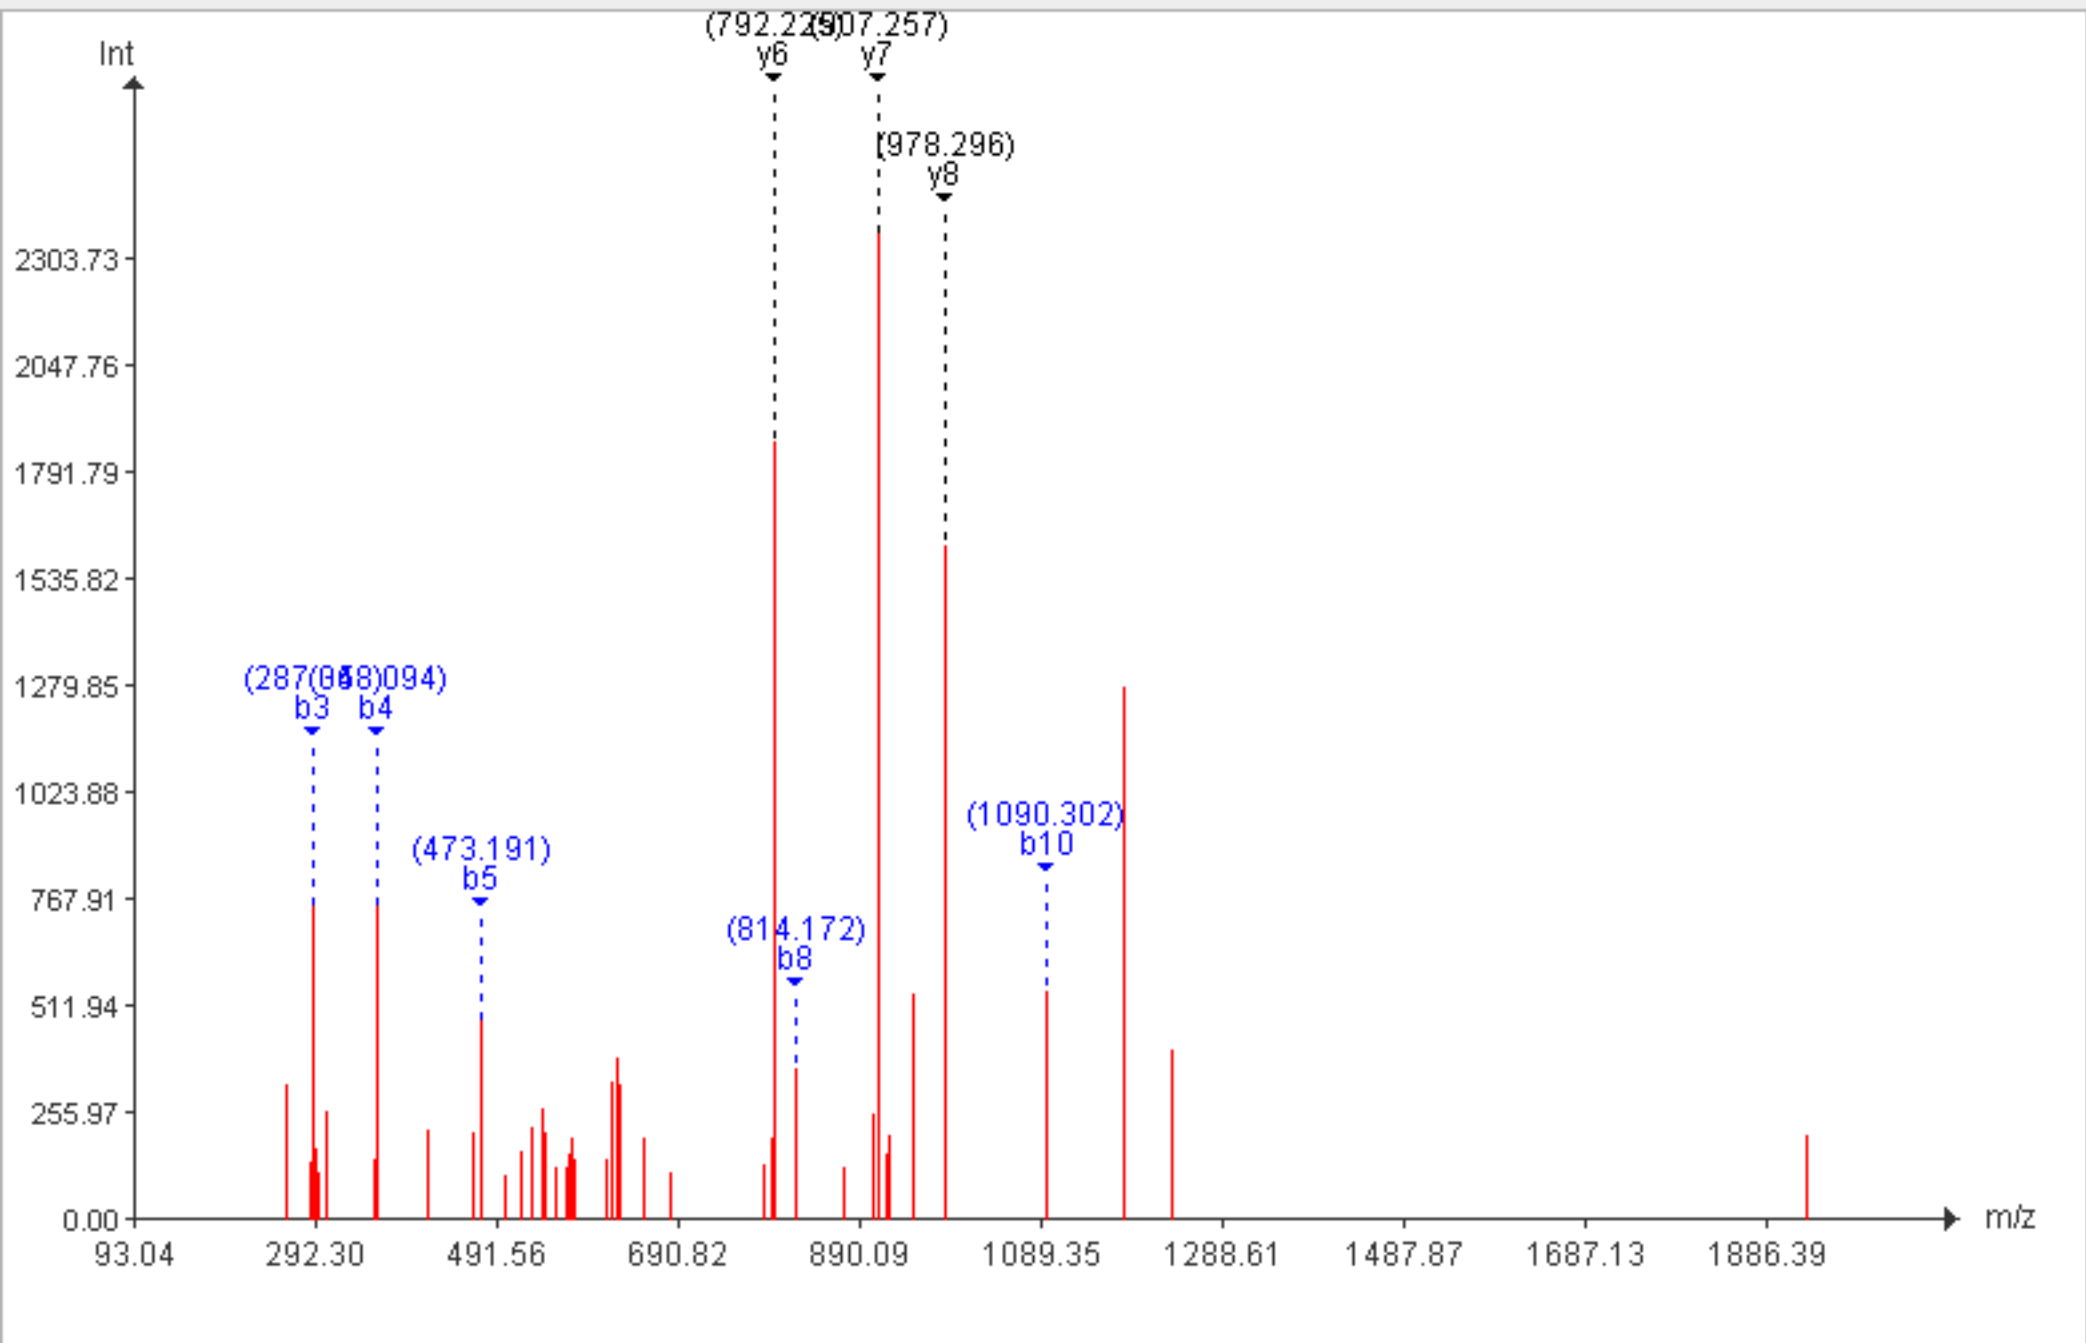

**AcD3-SGQGPPAEIIIEGEEEAAK(AcD3K\*)EEAEAQGVR(C13\*)-COOH**

**precursor mass: 1455.0120 Da (charge: +2) protein: P51859 (206-232)**

**score (threshold): 43.0 (31.0)**

**instrument: Bruker Esquire HCT**

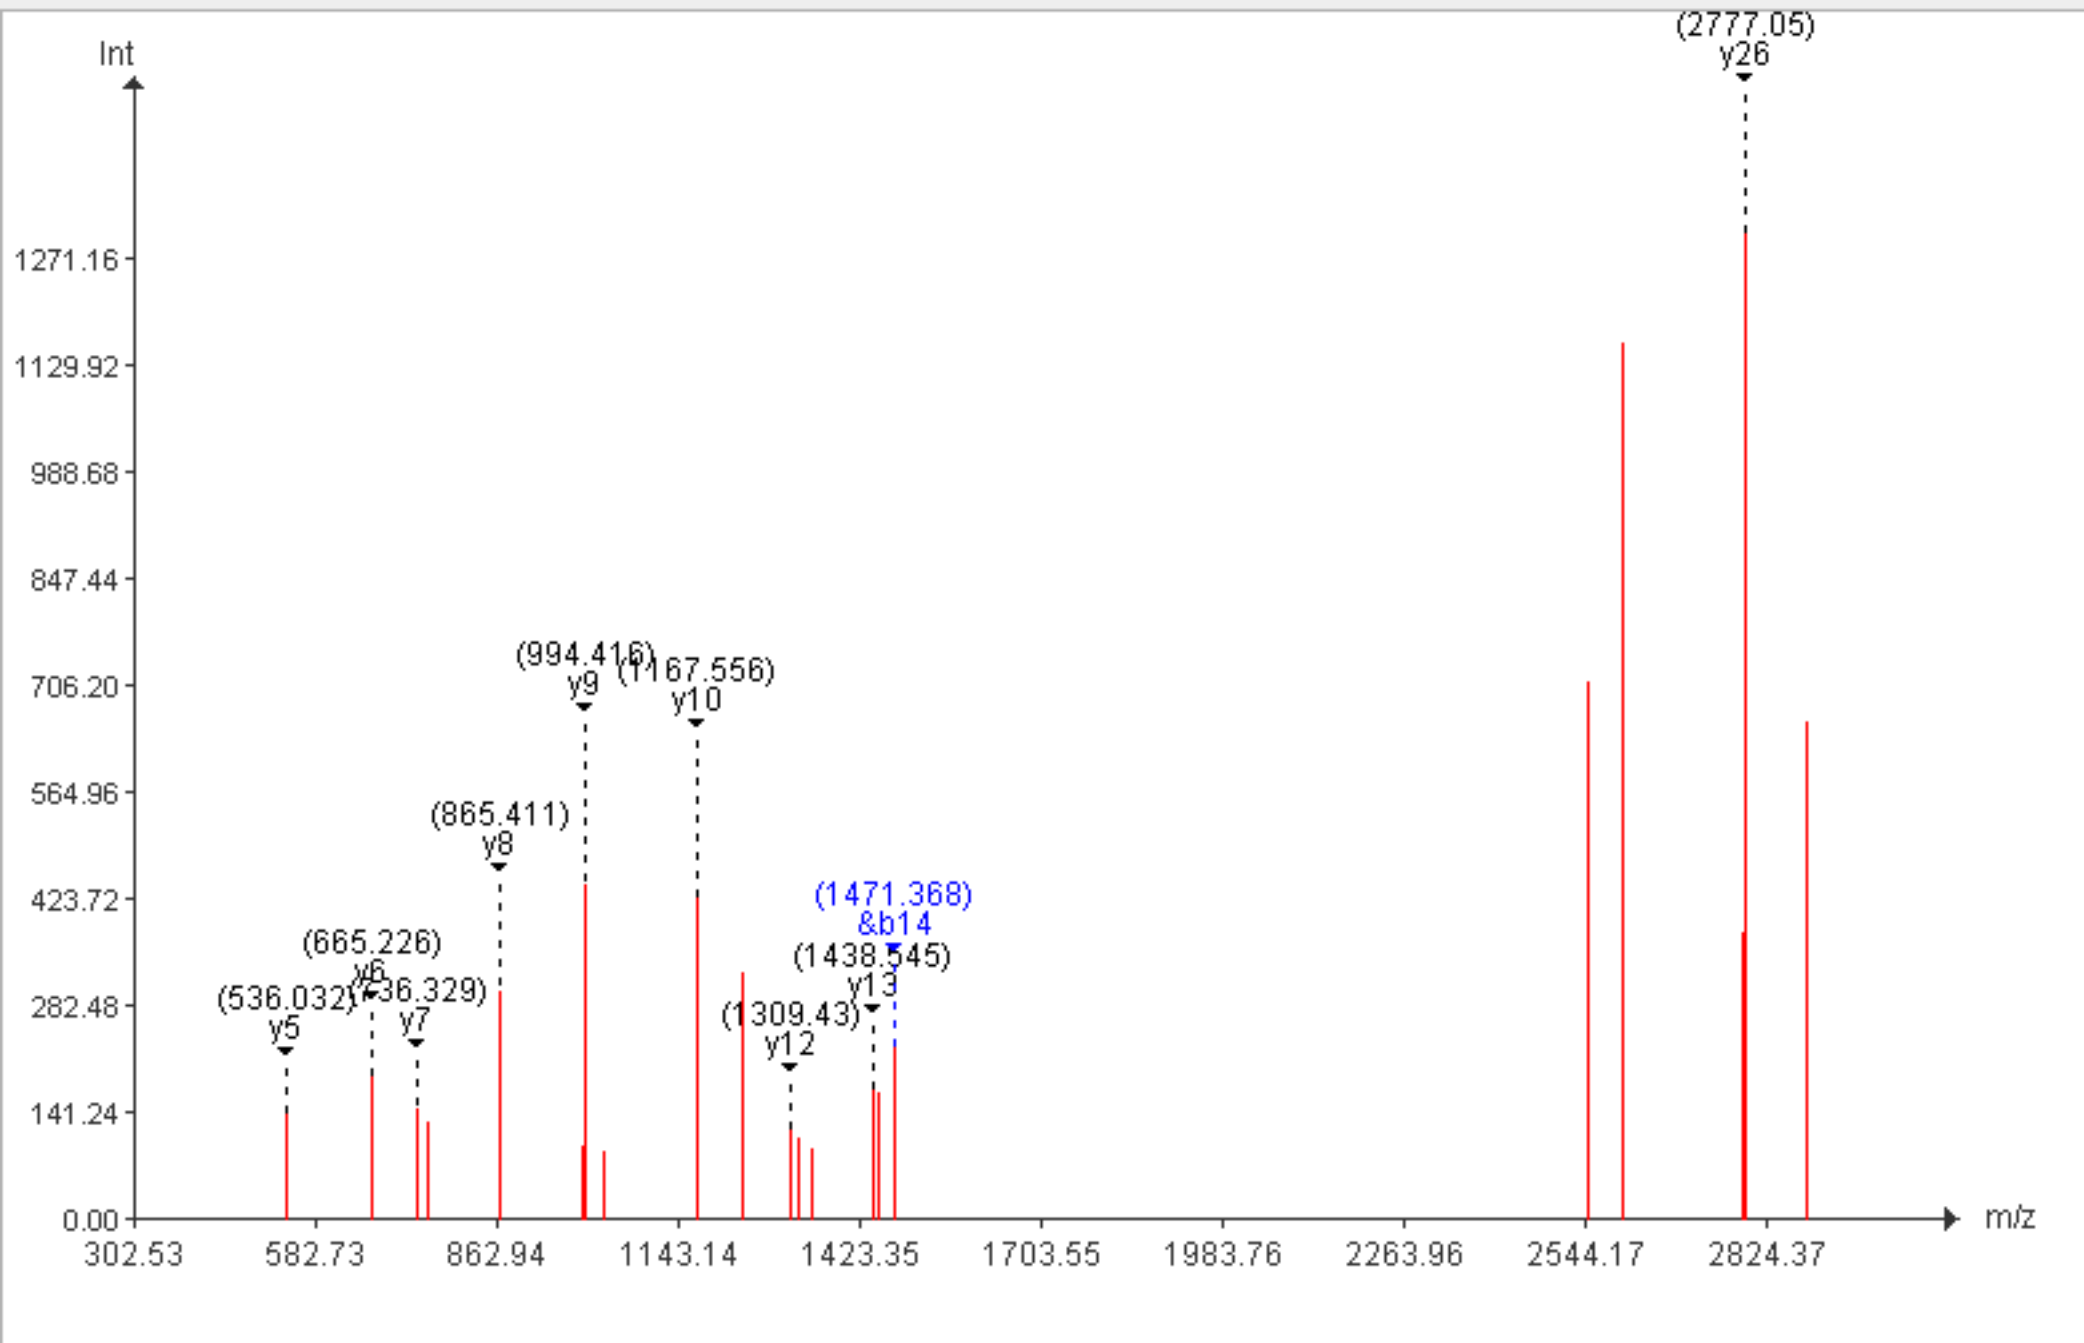



**AcD3-AEAAM(Mox)DISEGR(C13\*)-COOH**  
**precursor mass: 608.8150 Da (charge: +2) protein: P56399 (768-778)**  
**score (threshold): 107.0 (31.0)**  
**instrument: Bruker Esquire HCT**

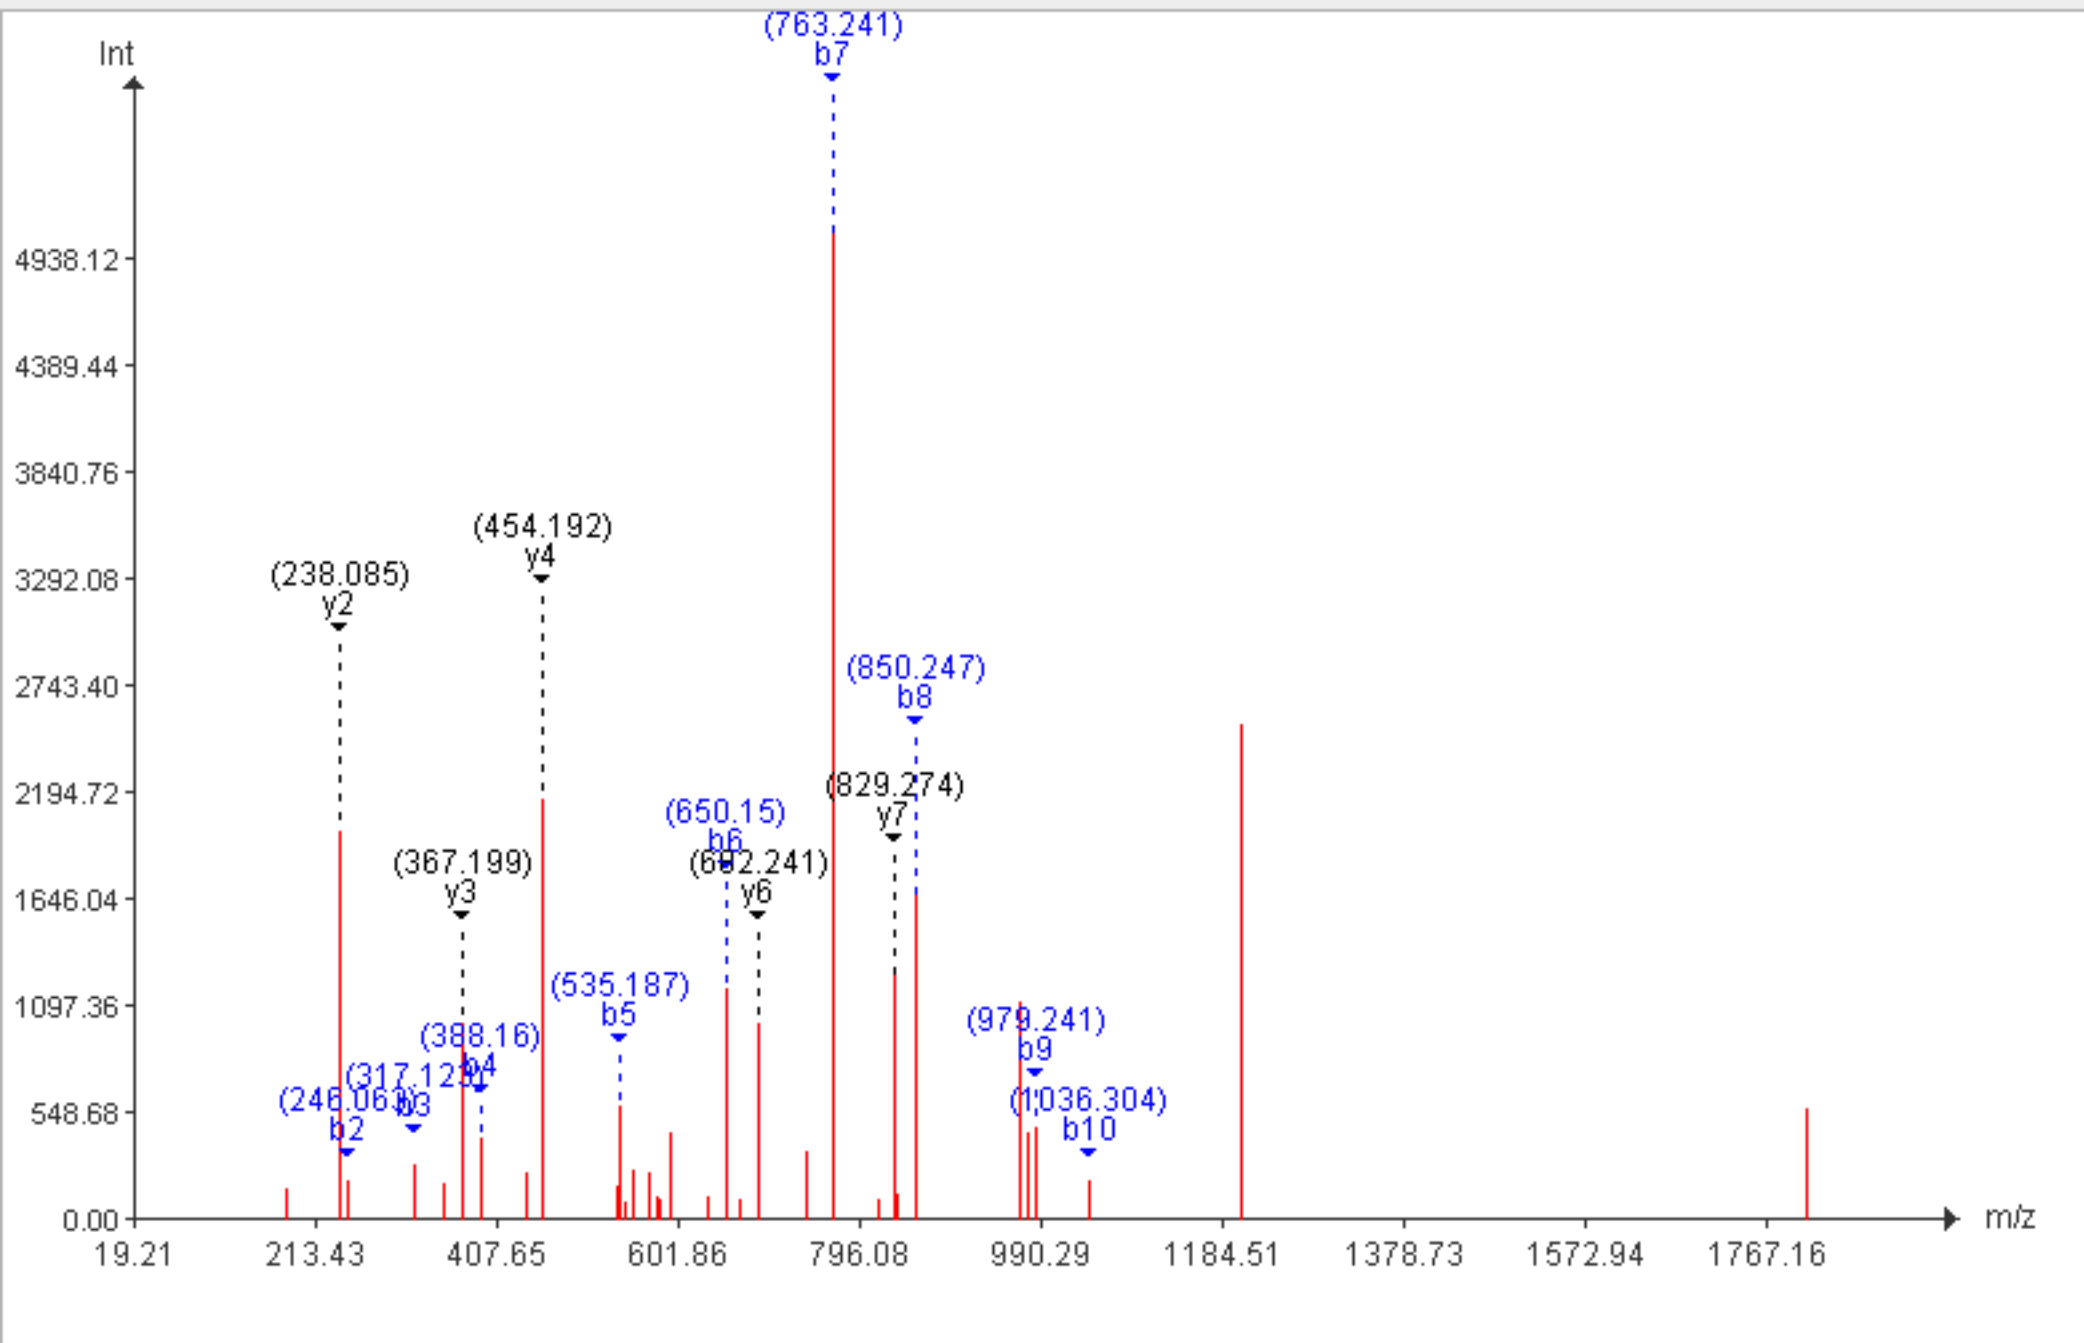

**AcD3-GEEQAEK(AcD3K\*)TK(AcD3K\*)GK(AcD3K\*)R-COOH**  
**precursor mass: 770.8810 Da (charge: +2) protein: O88271 (41-52)**  
**score (threshold): 52.0 (31.0)**  
**instrument: Bruker Esquire HCT**

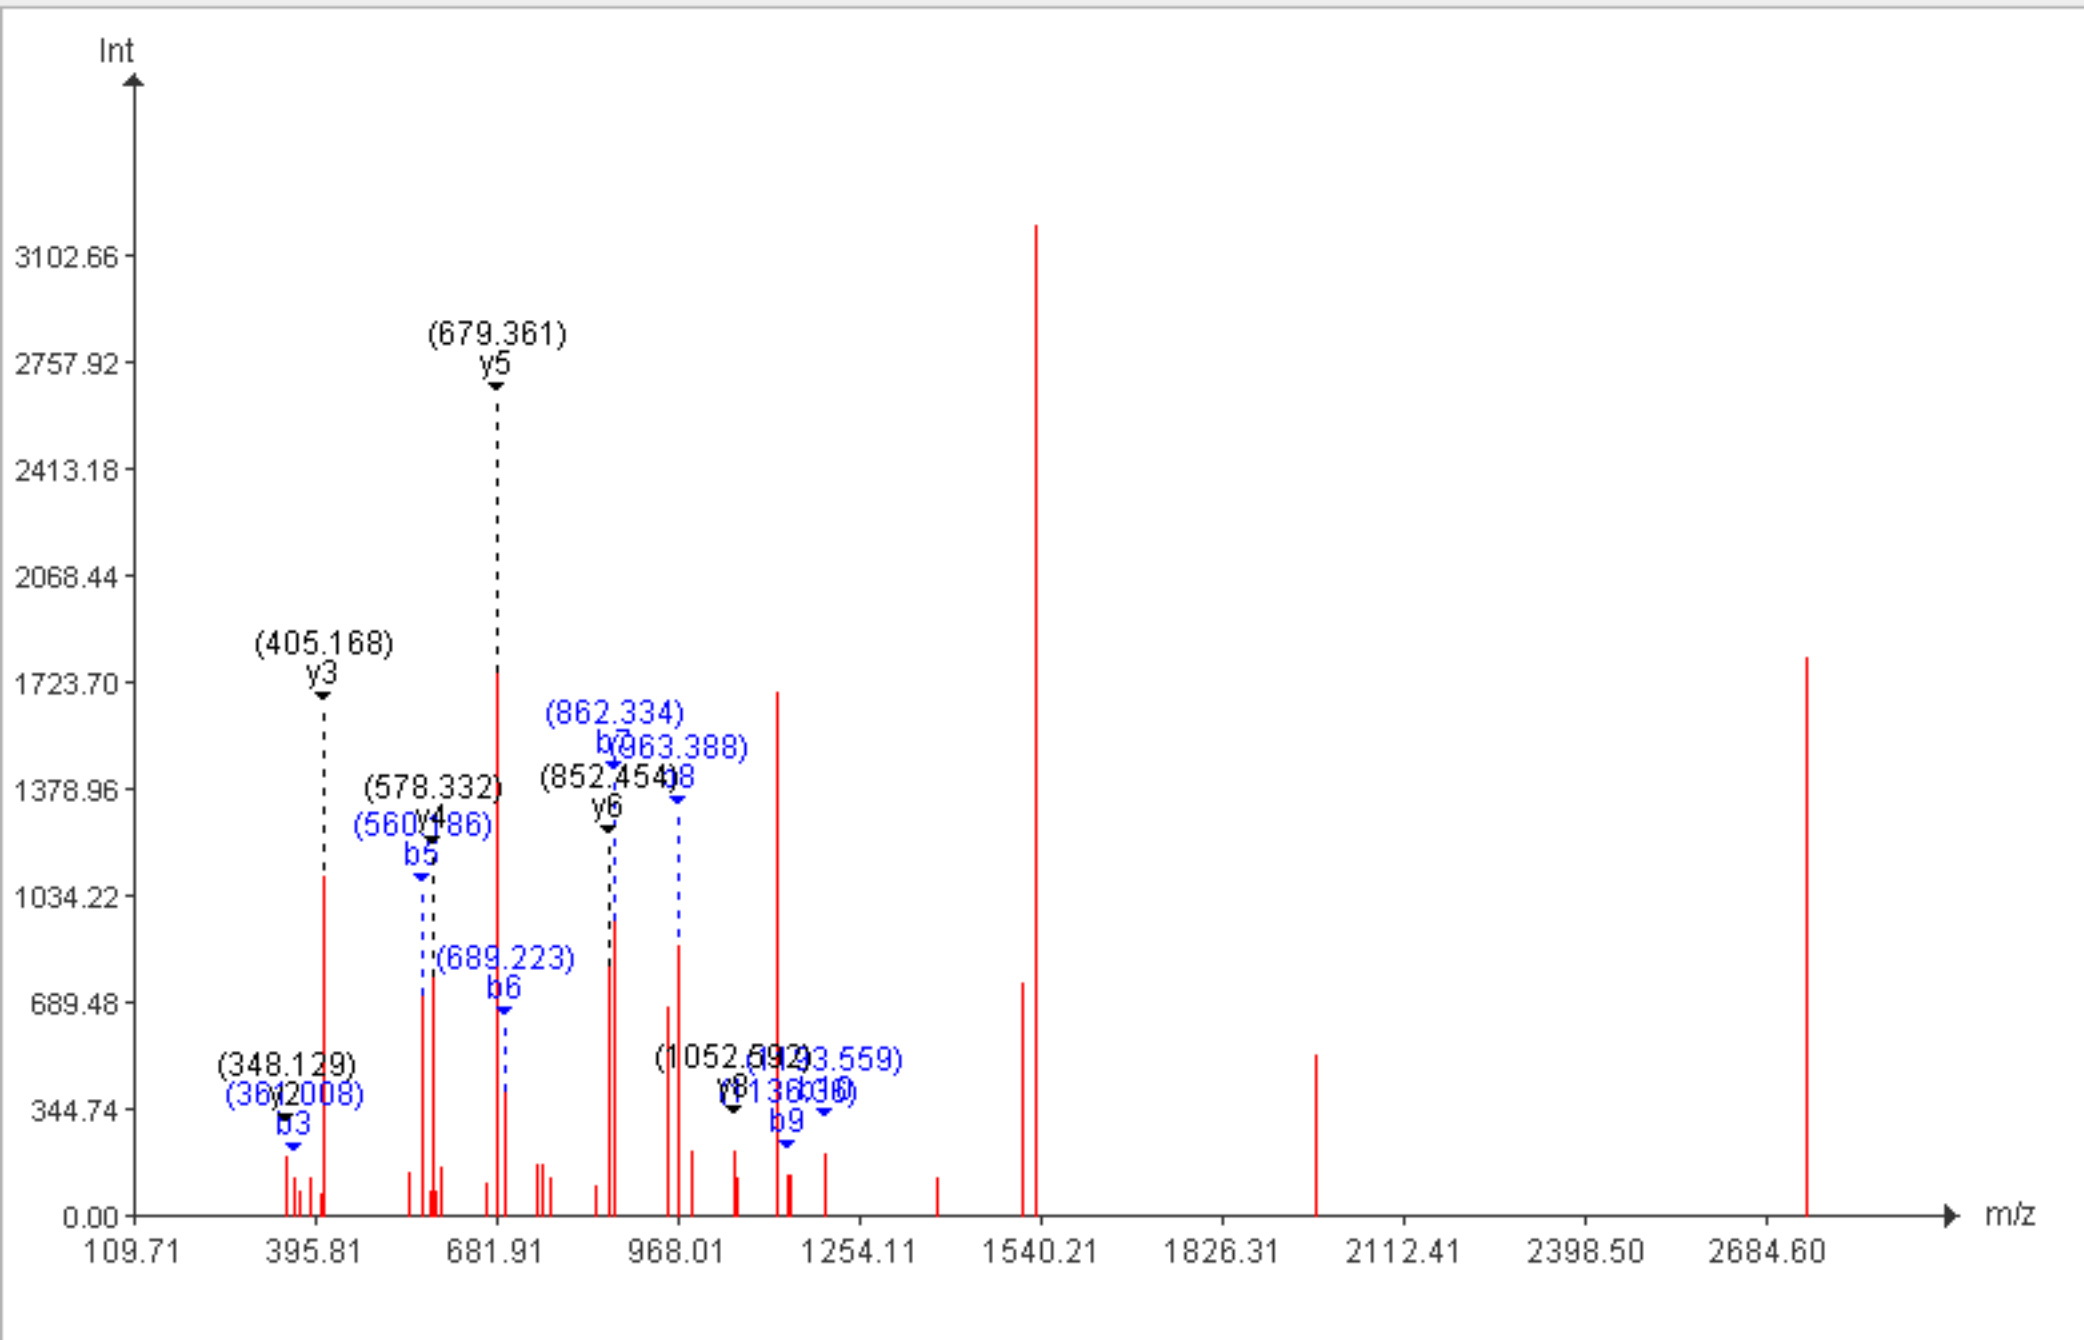

**AcD3-FLEGDQK(AcD3K\*)PVER-COOH**

**precursor mass: 704.4440 Da (charge: +2) protein: Q9D903 (212-222)**

**score (threshold): 49.0 (31.0)**

**instrument: Bruker Esquire HCT**

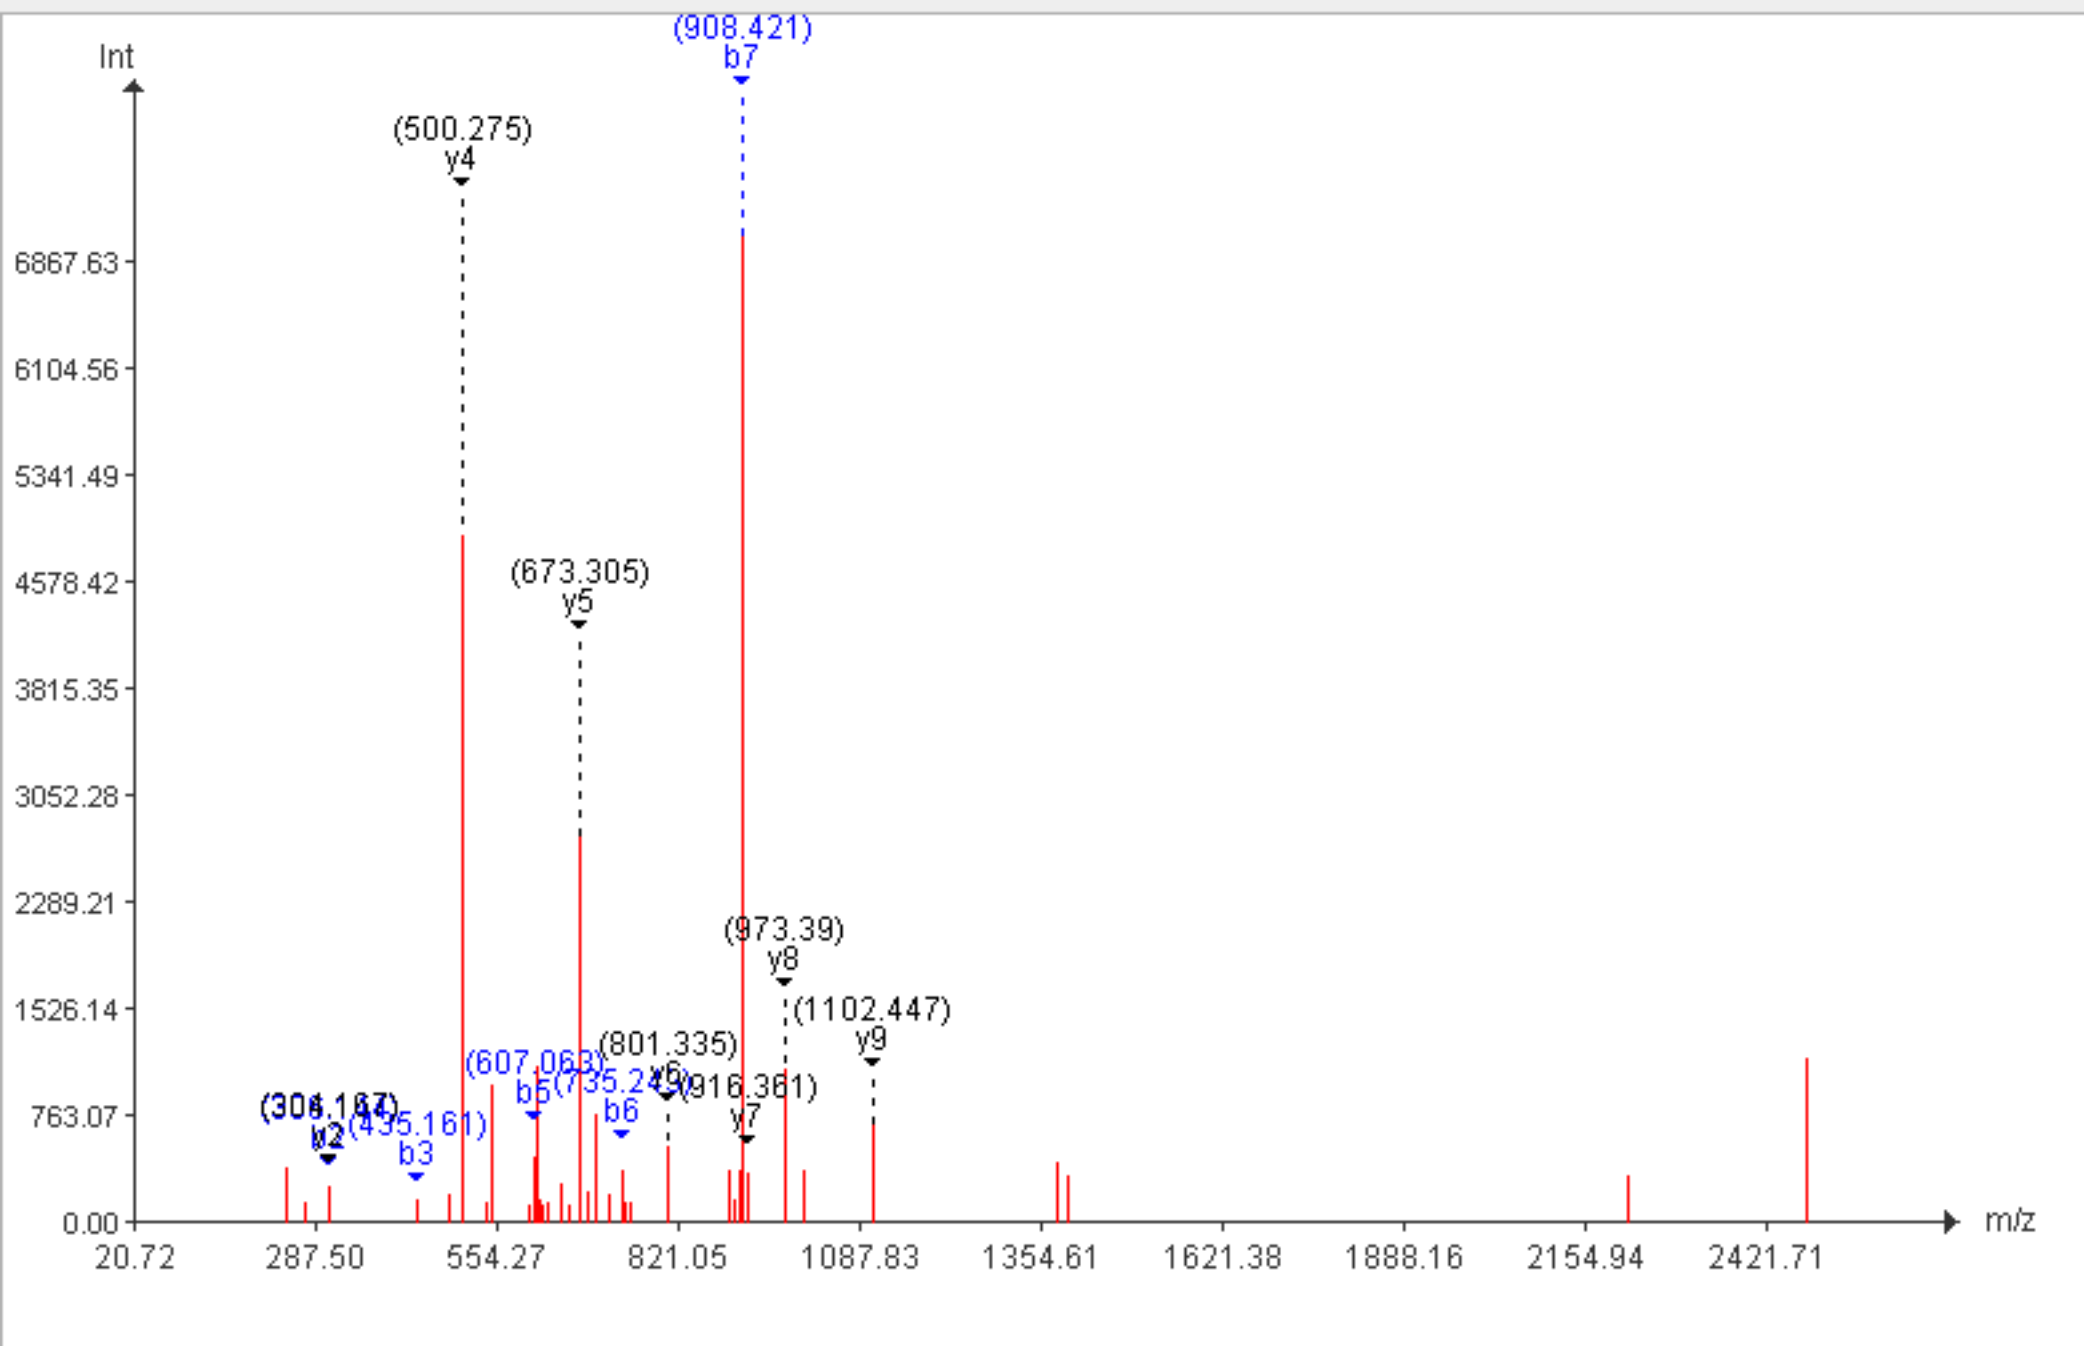

**AcD3-GK(AcD3K\*)TEQK(AcD3K\*)GGDK(AcD3K\*)K(AcD3K\*)R-COOH**  
**precursor mass: 778.9680 Da (charge: +2) protein: IPI00479217.1 (214-225)**  
**score (threshold): 69.0 (34.0)**  
**instrument: Bruker Esquire HCT**

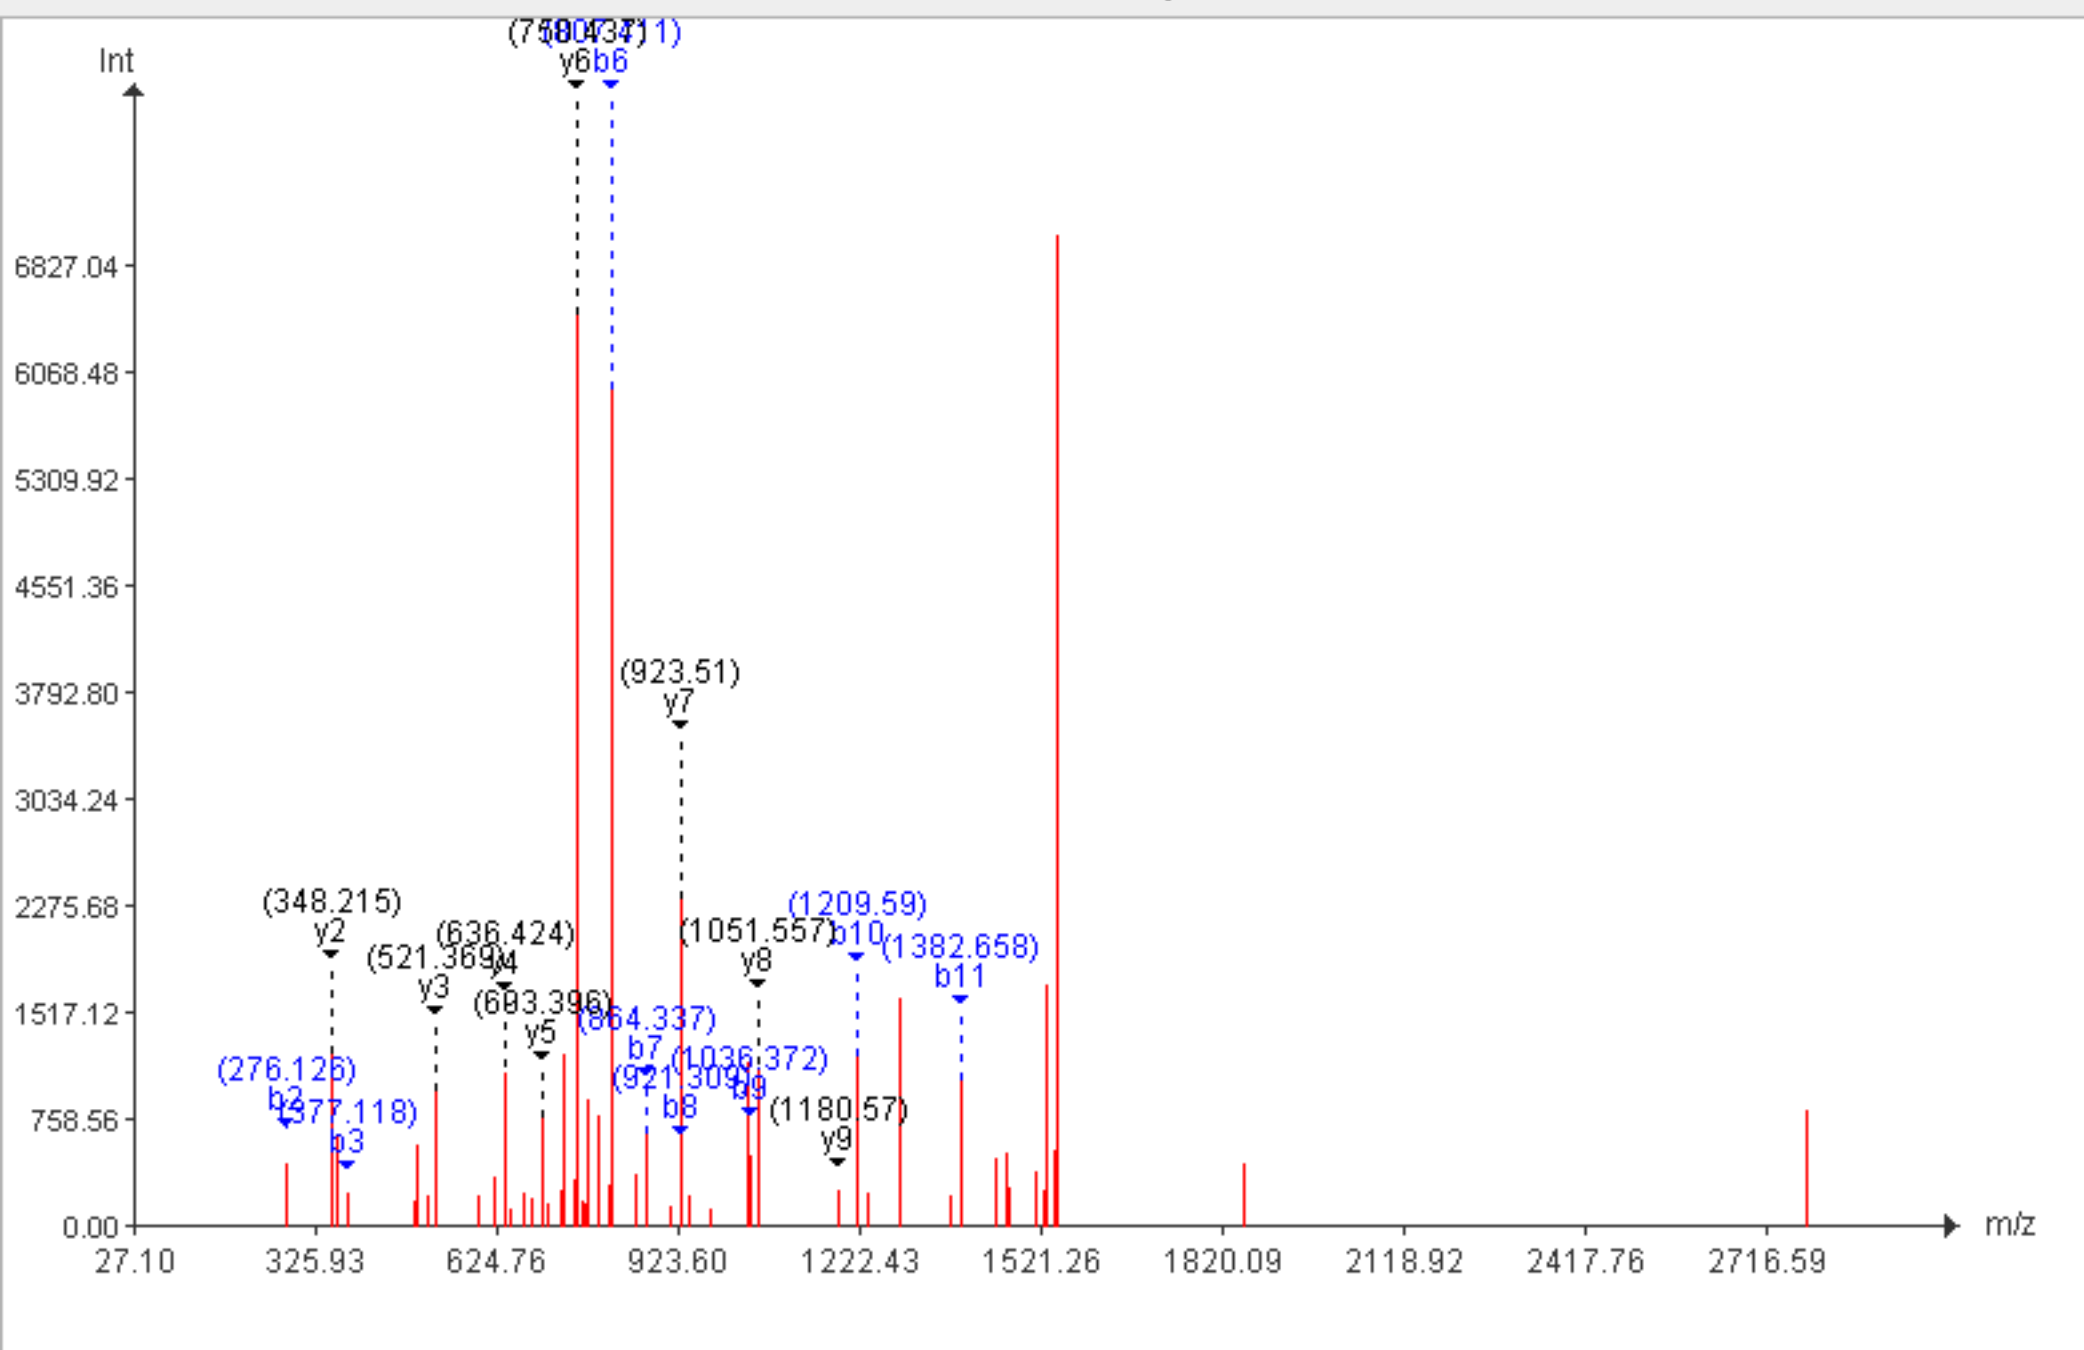

**AcD3-M(Mox)VNDGVEDLR(C13\*)-COOH**  
**precursor mass: 607.8840 Da (charge: +2) protein: P19157 (91-100)**  
**score (threshold): 54.0 (31.0)**  
**instrument: Bruker Esquire HCT**

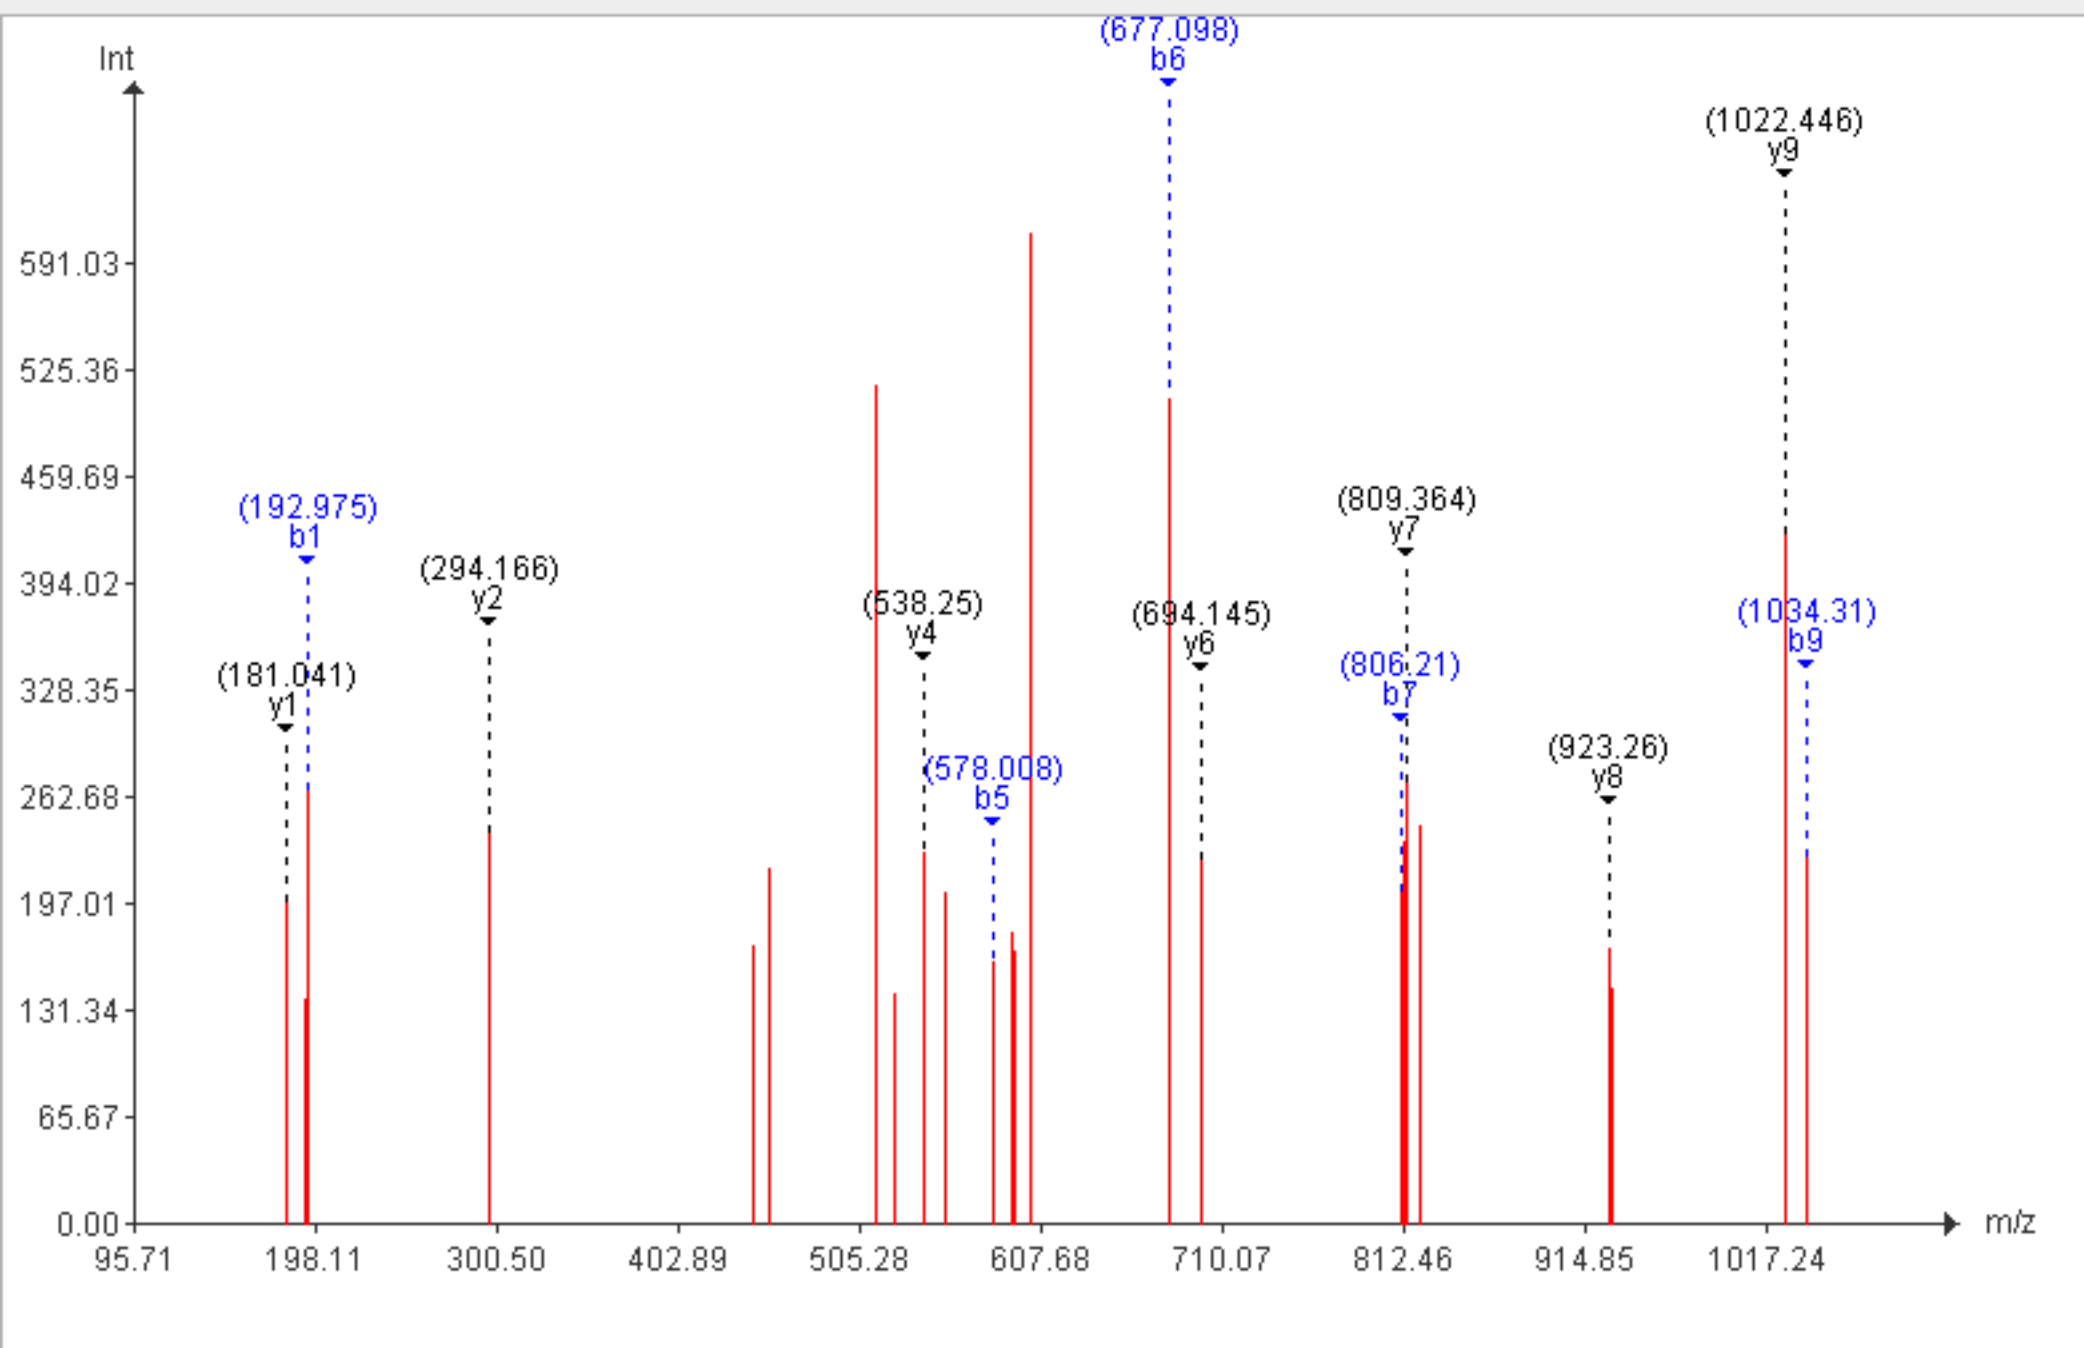

**AcD3-FSQLLNC(Cmm\*)PEFVPR-COOH**  
**precursor mass: 826.4189 Da (charge: +2) protein: Q3UU34 (298-310)**  
**score (threshold): 68.0 (32.0)**  
**instrument: Waters Q-TOF Premier**

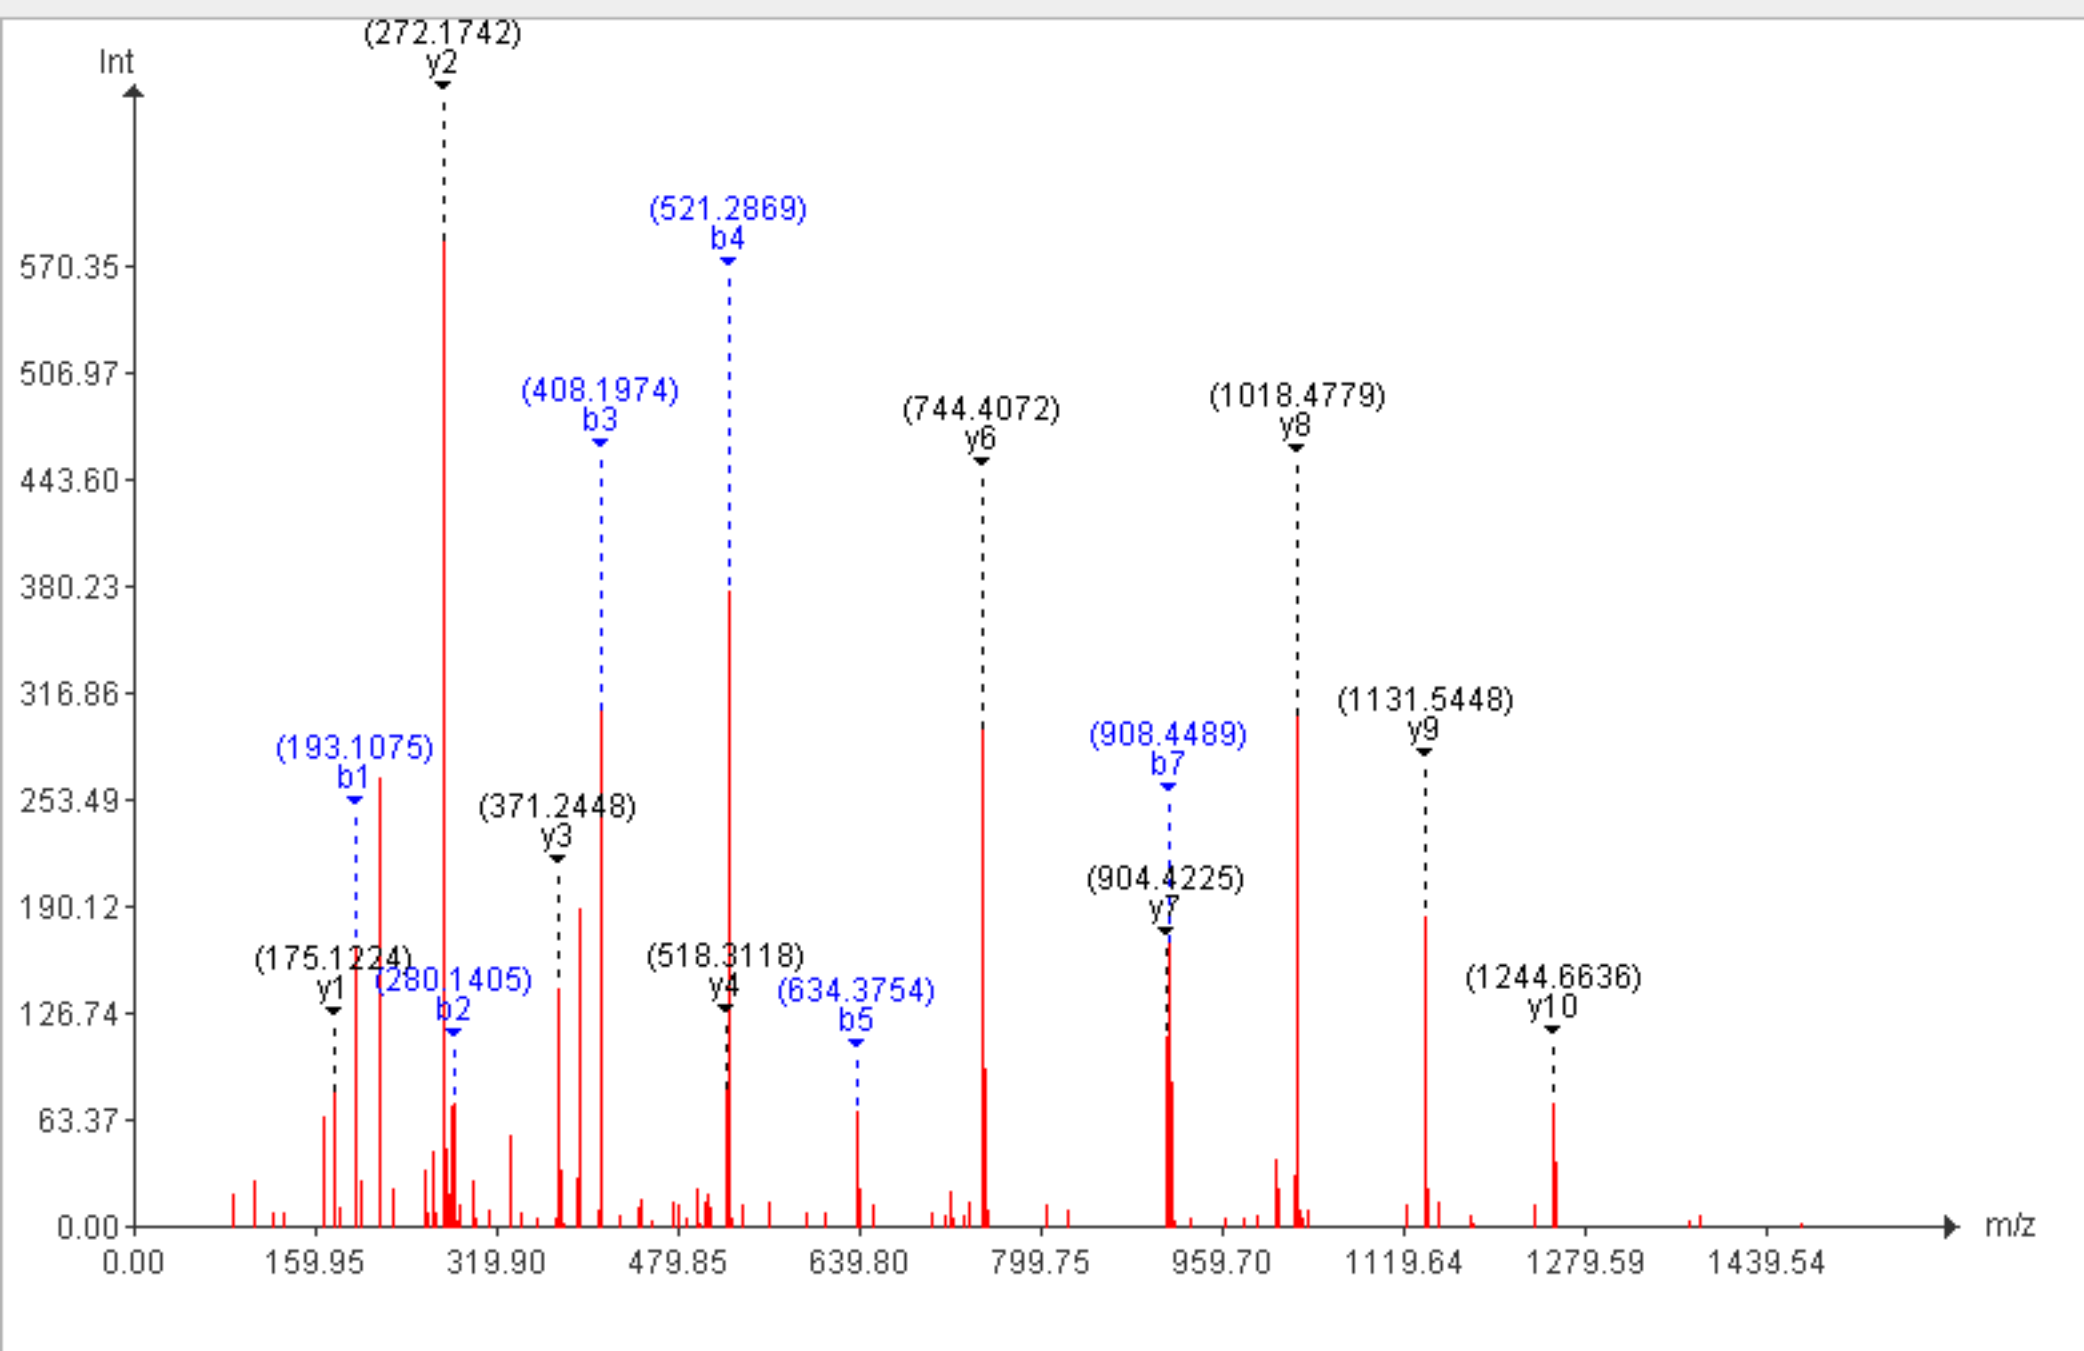

**AcD3-FSLADAINTEFK(AcD3K\*)NTR-COOH**  
**precursor mass: 908.9656 Da (charge: +2) protein: P20152 (86-100)**  
**score (threshold): 89.0 (31.0)**  
**instrument: Waters Q-TOF Premier**

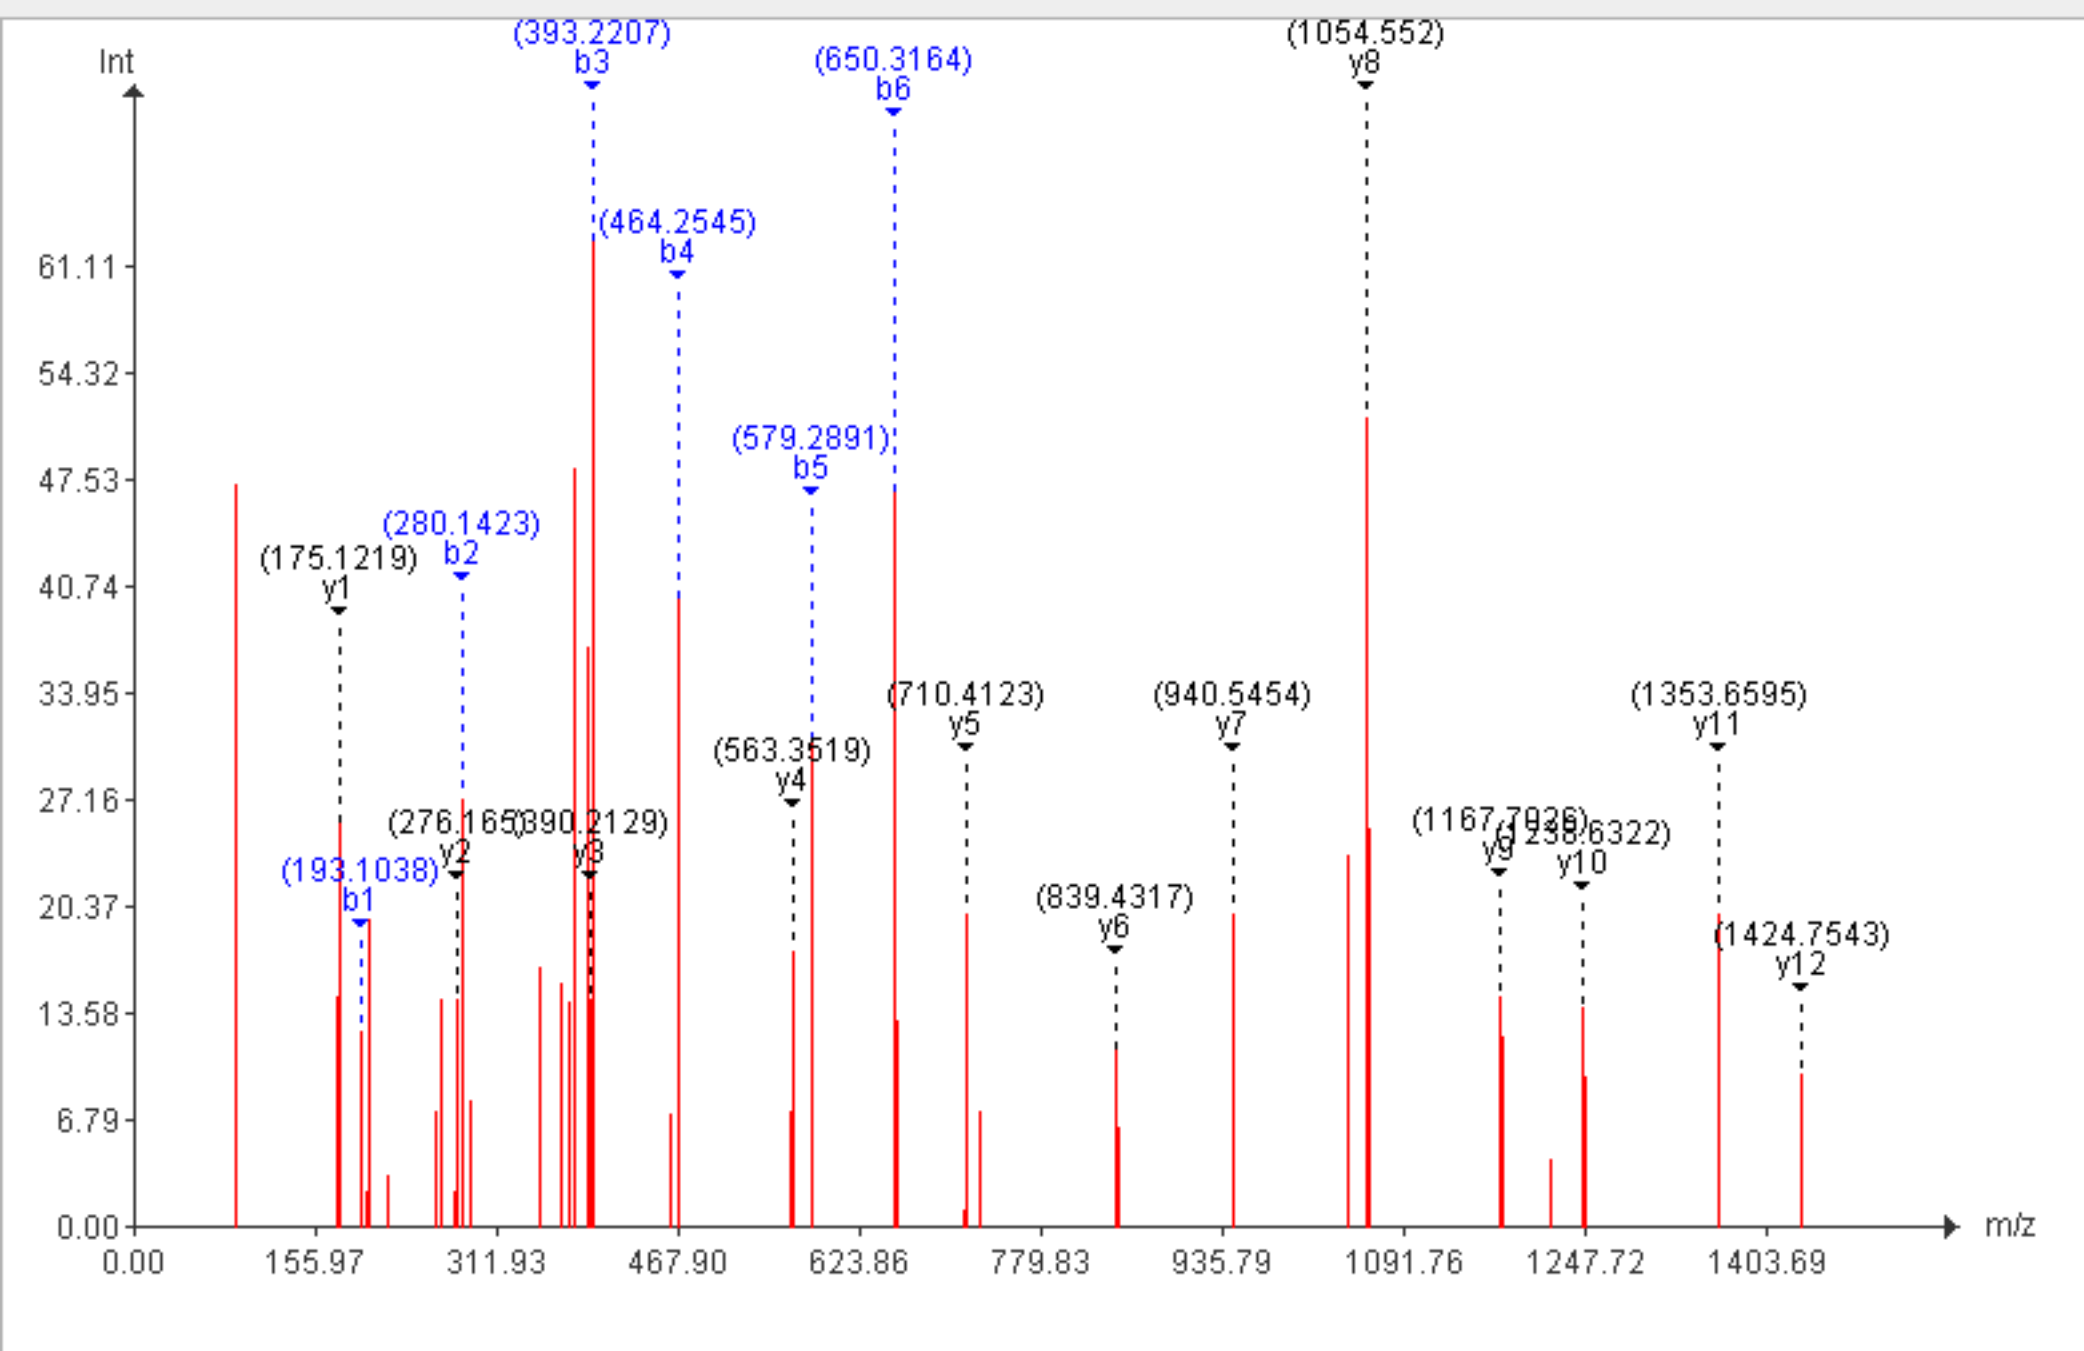

**AcD3-FPLSPPK(AcD3K\*)K(AcD3K\*)K(AcD3K\*)DL SLEEIQK(AcD3K\*)K(AcD3K\*)LEAAEER(C13\*)-COOH**

**precursor mass: 1100.6226 Da (charge: +3) protein: P54227 (35-60)**

**score (threshold): 39.0 (29.0)**

**instrument: Waters Q-TOF Premier**

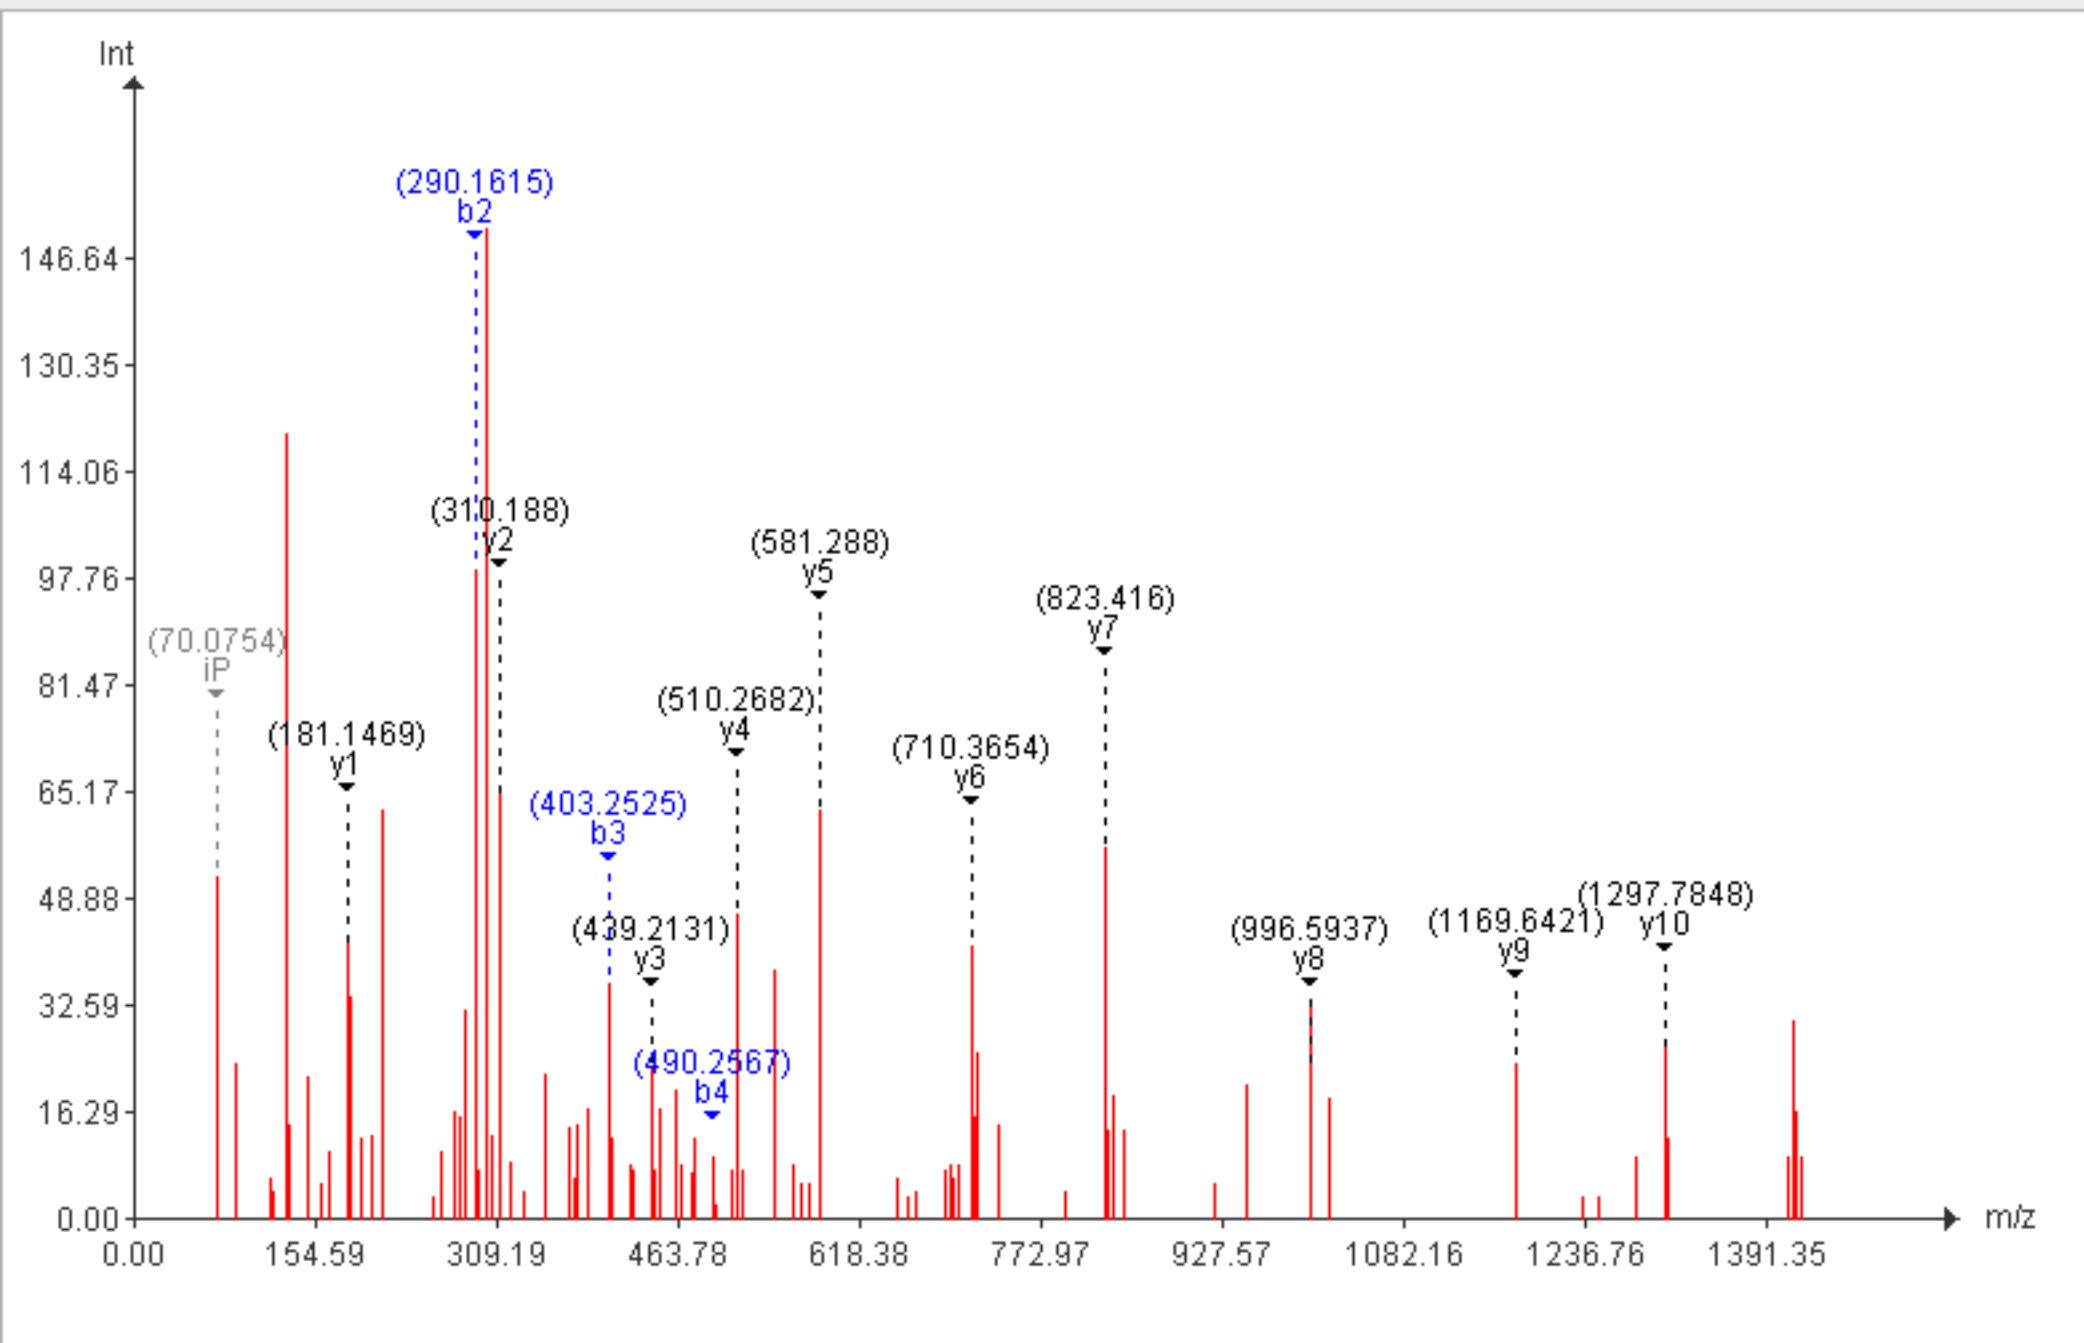



AcD3-AAGVASLLTAEAVVTEIPK(AcD3K\*)EEK(AcD3K\*)DPGM(Mox\*)GAM(Mox\*)GGM(Mox\*)GGGM(Mox\*)GGGM(Mox\*)F-COOH

precursor mass: 1050.2289 Da (charge: +4) protein: P63038 (532-573)

score (threshold): 26.0 (20.0)

instrument: Waters Q-TOF Premier

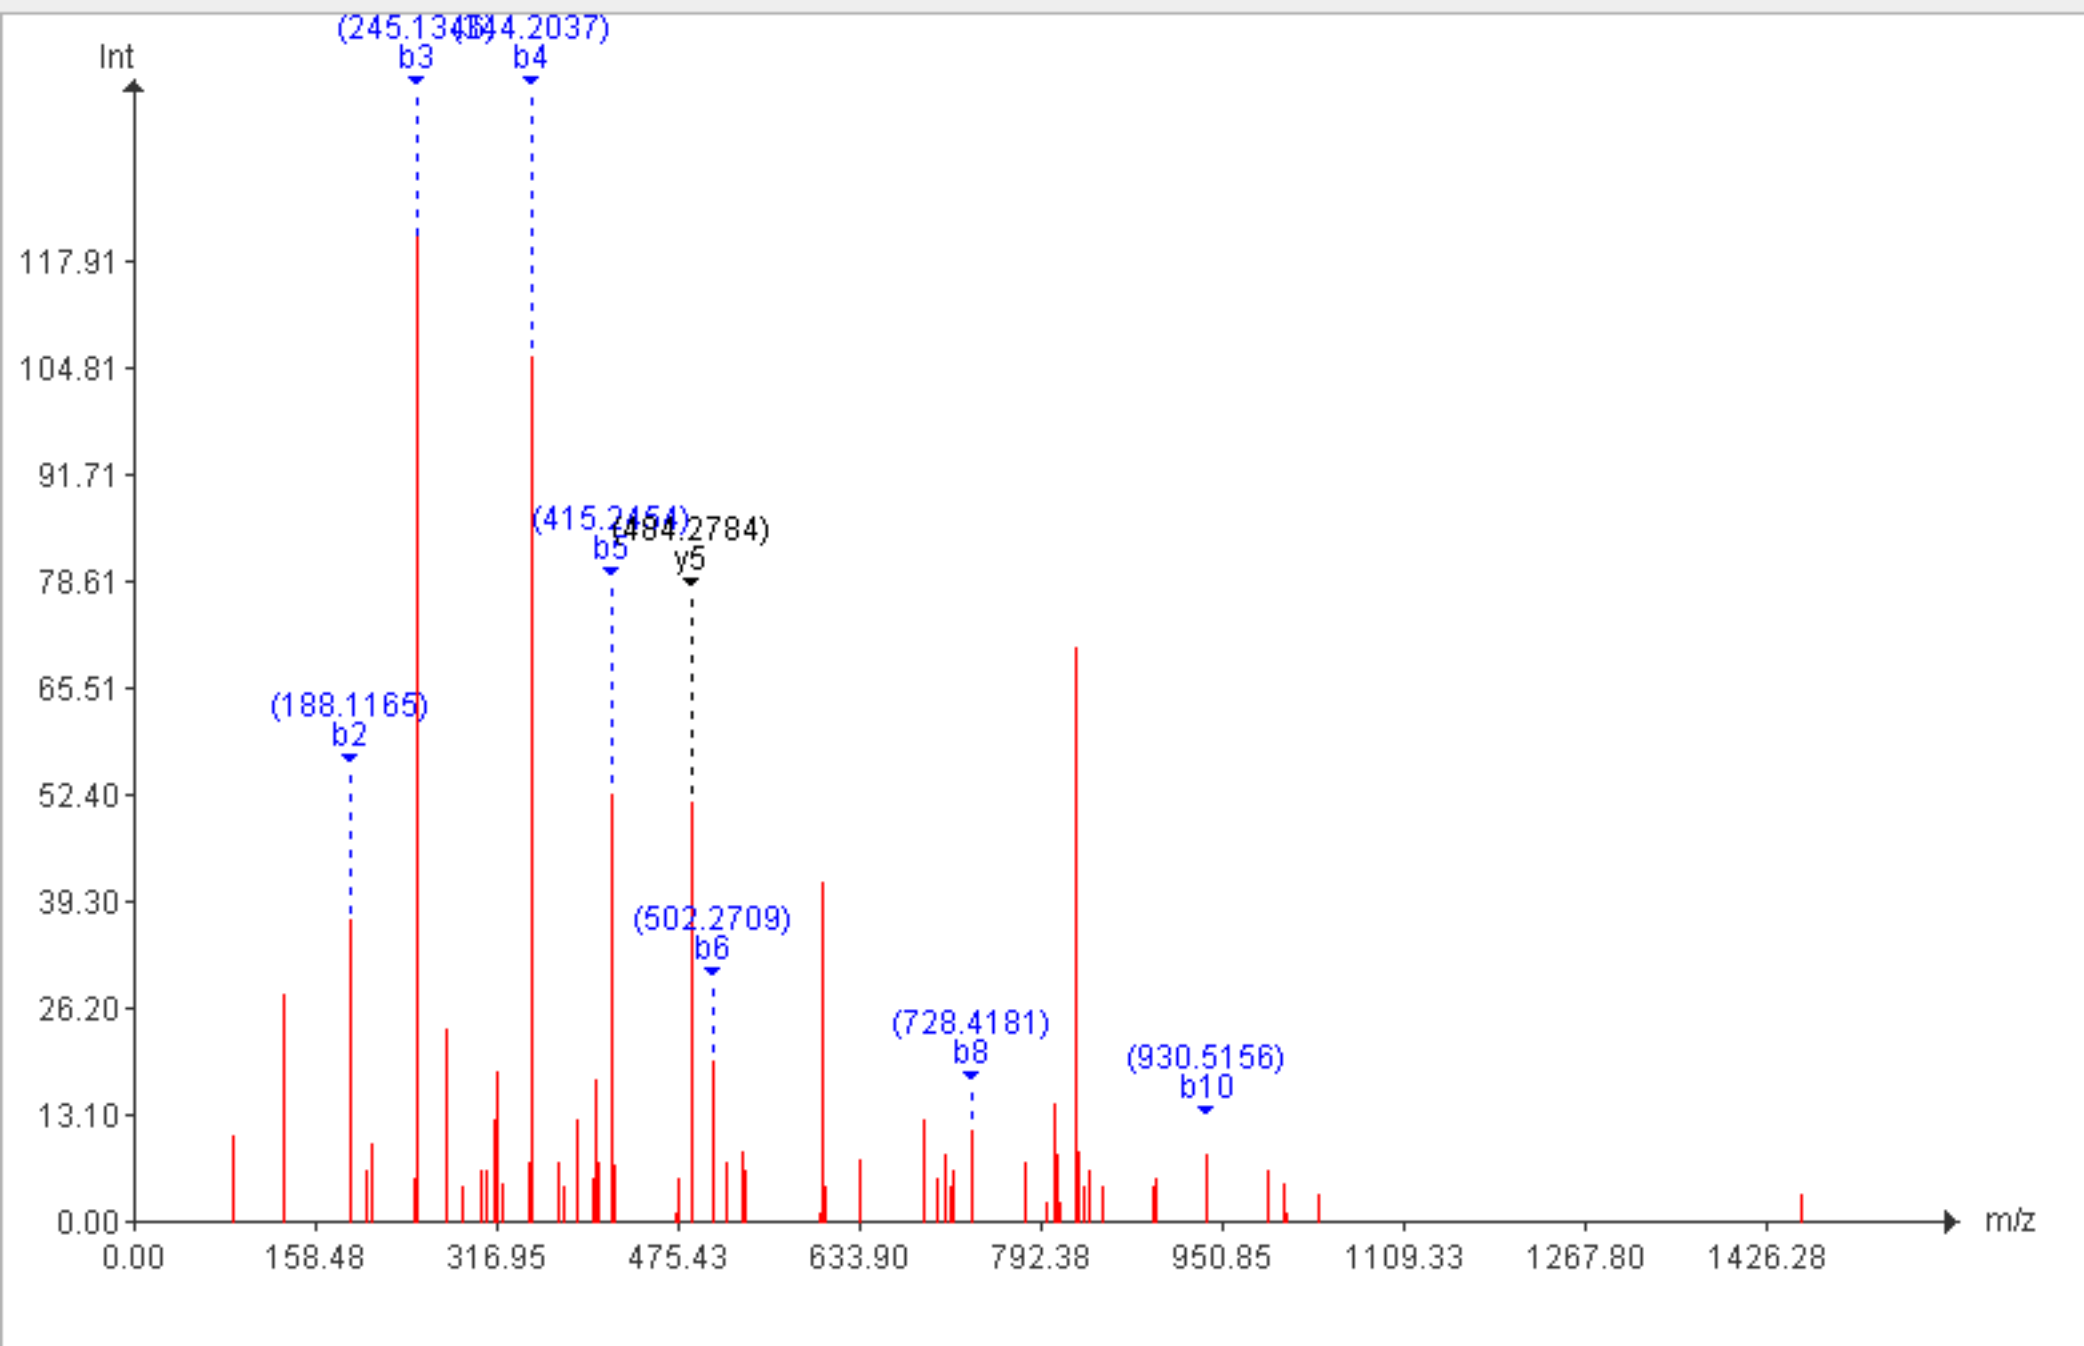

**AcD3-LFAIAK(AcD3K\*)DSQK(AcD3K\*)K(AcD3K\*)TQR-COOH**  
precursor mass: 907.5250 Da (charge: +2) protein: Q6PGL7 (669-682)  
score (threshold): 70.0 (31.0)  
instrument: Waters Q-TOF Premier

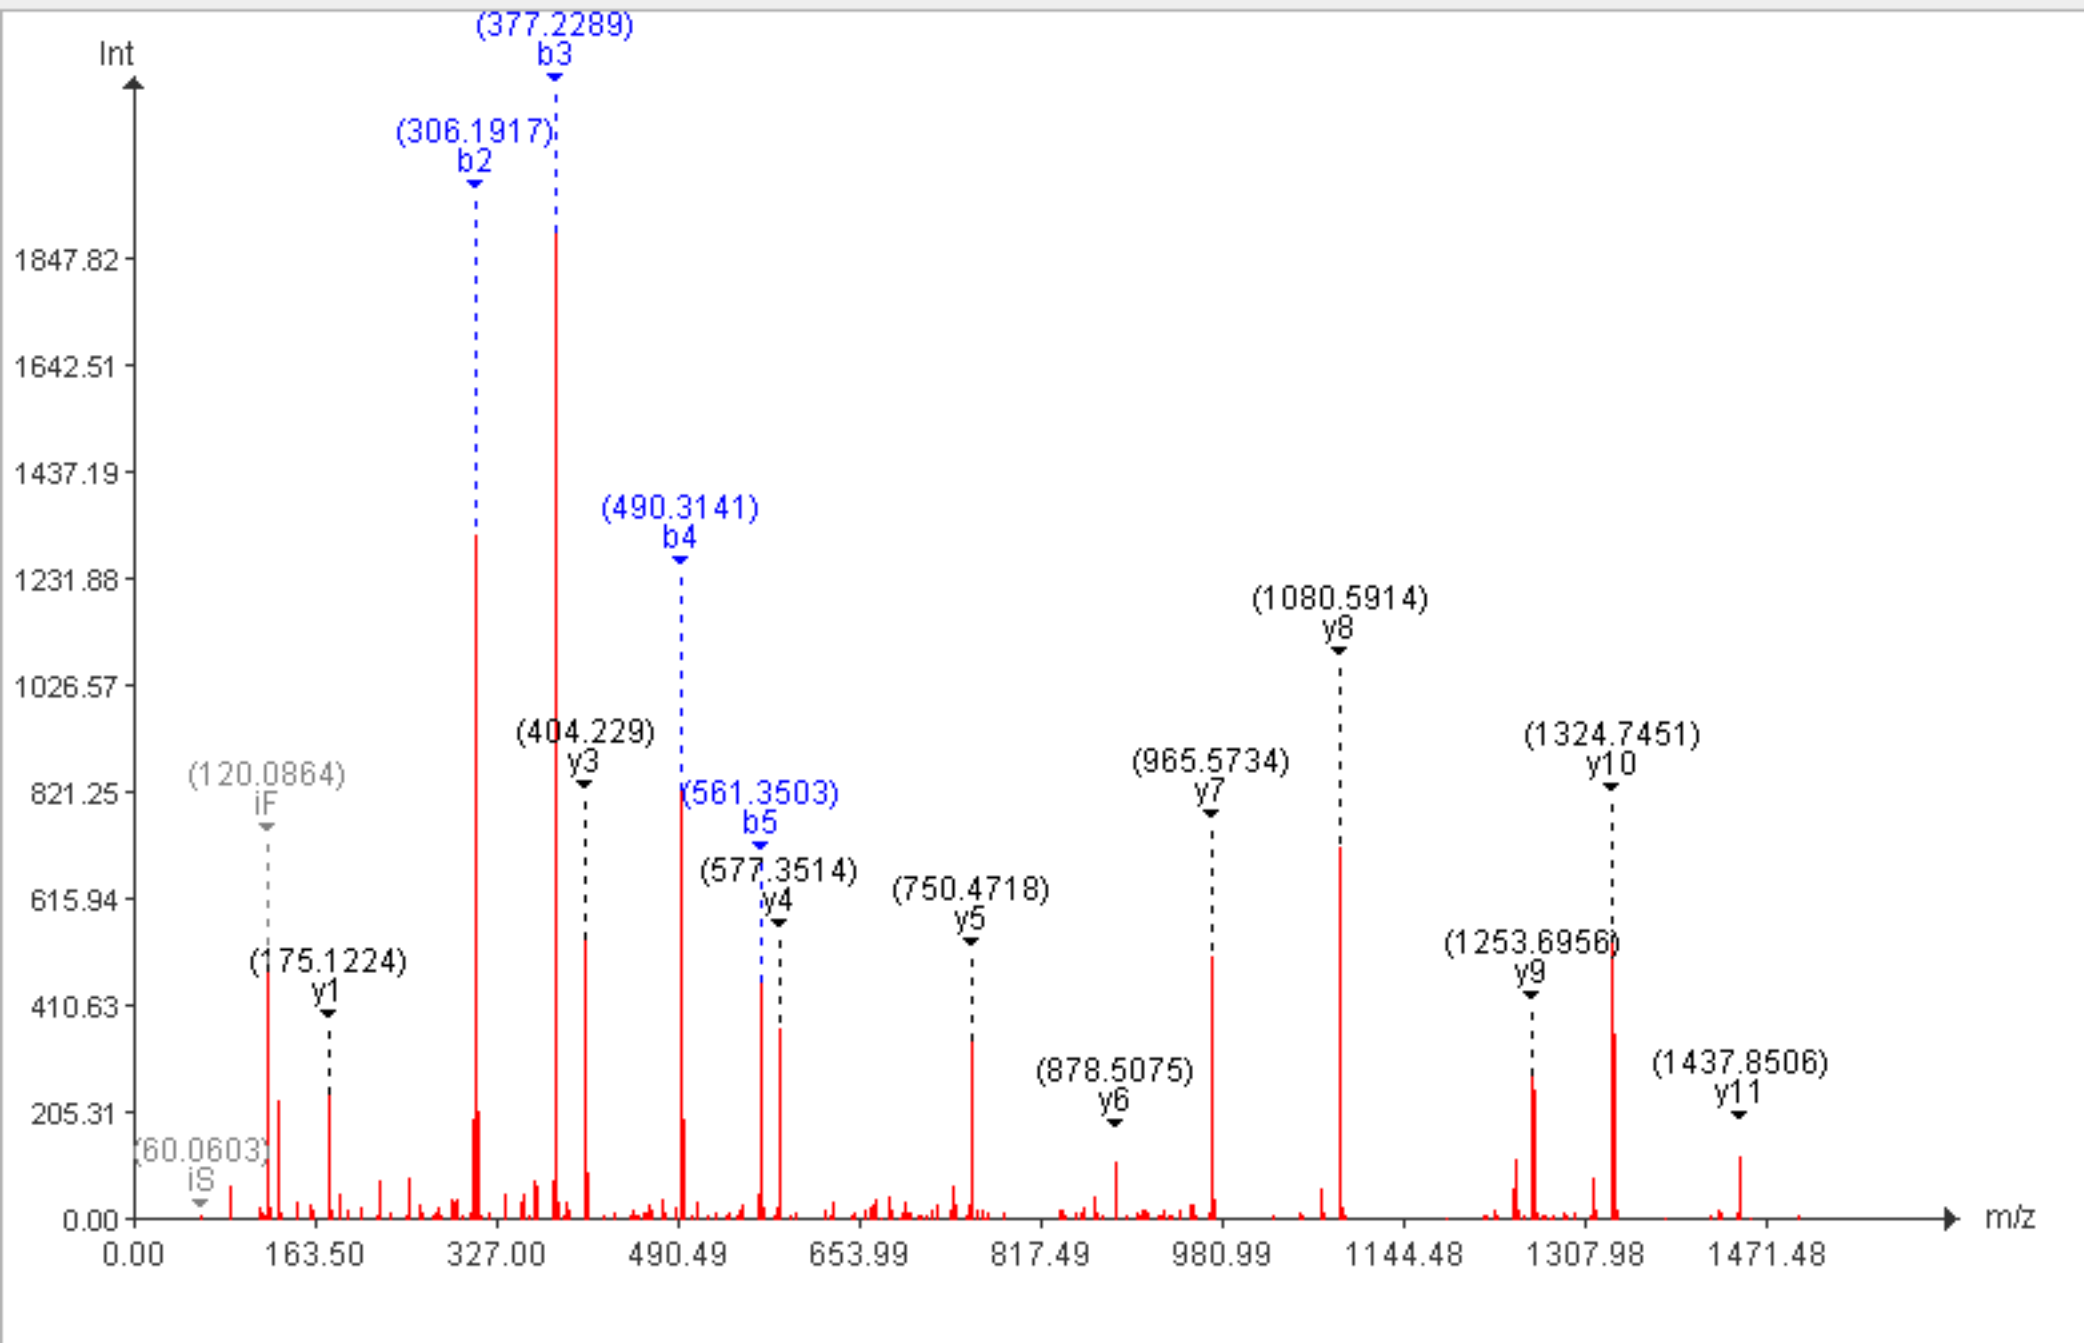

**AcD3-FAVEYFTR(C13\*)-COOH**

**precursor mass: 542.2842 Da (charge: +2) protein: P12367 (31-38)**

**score (threshold): 57.0 (30.0)**

**instrument: Waters Q-TOF Premier**

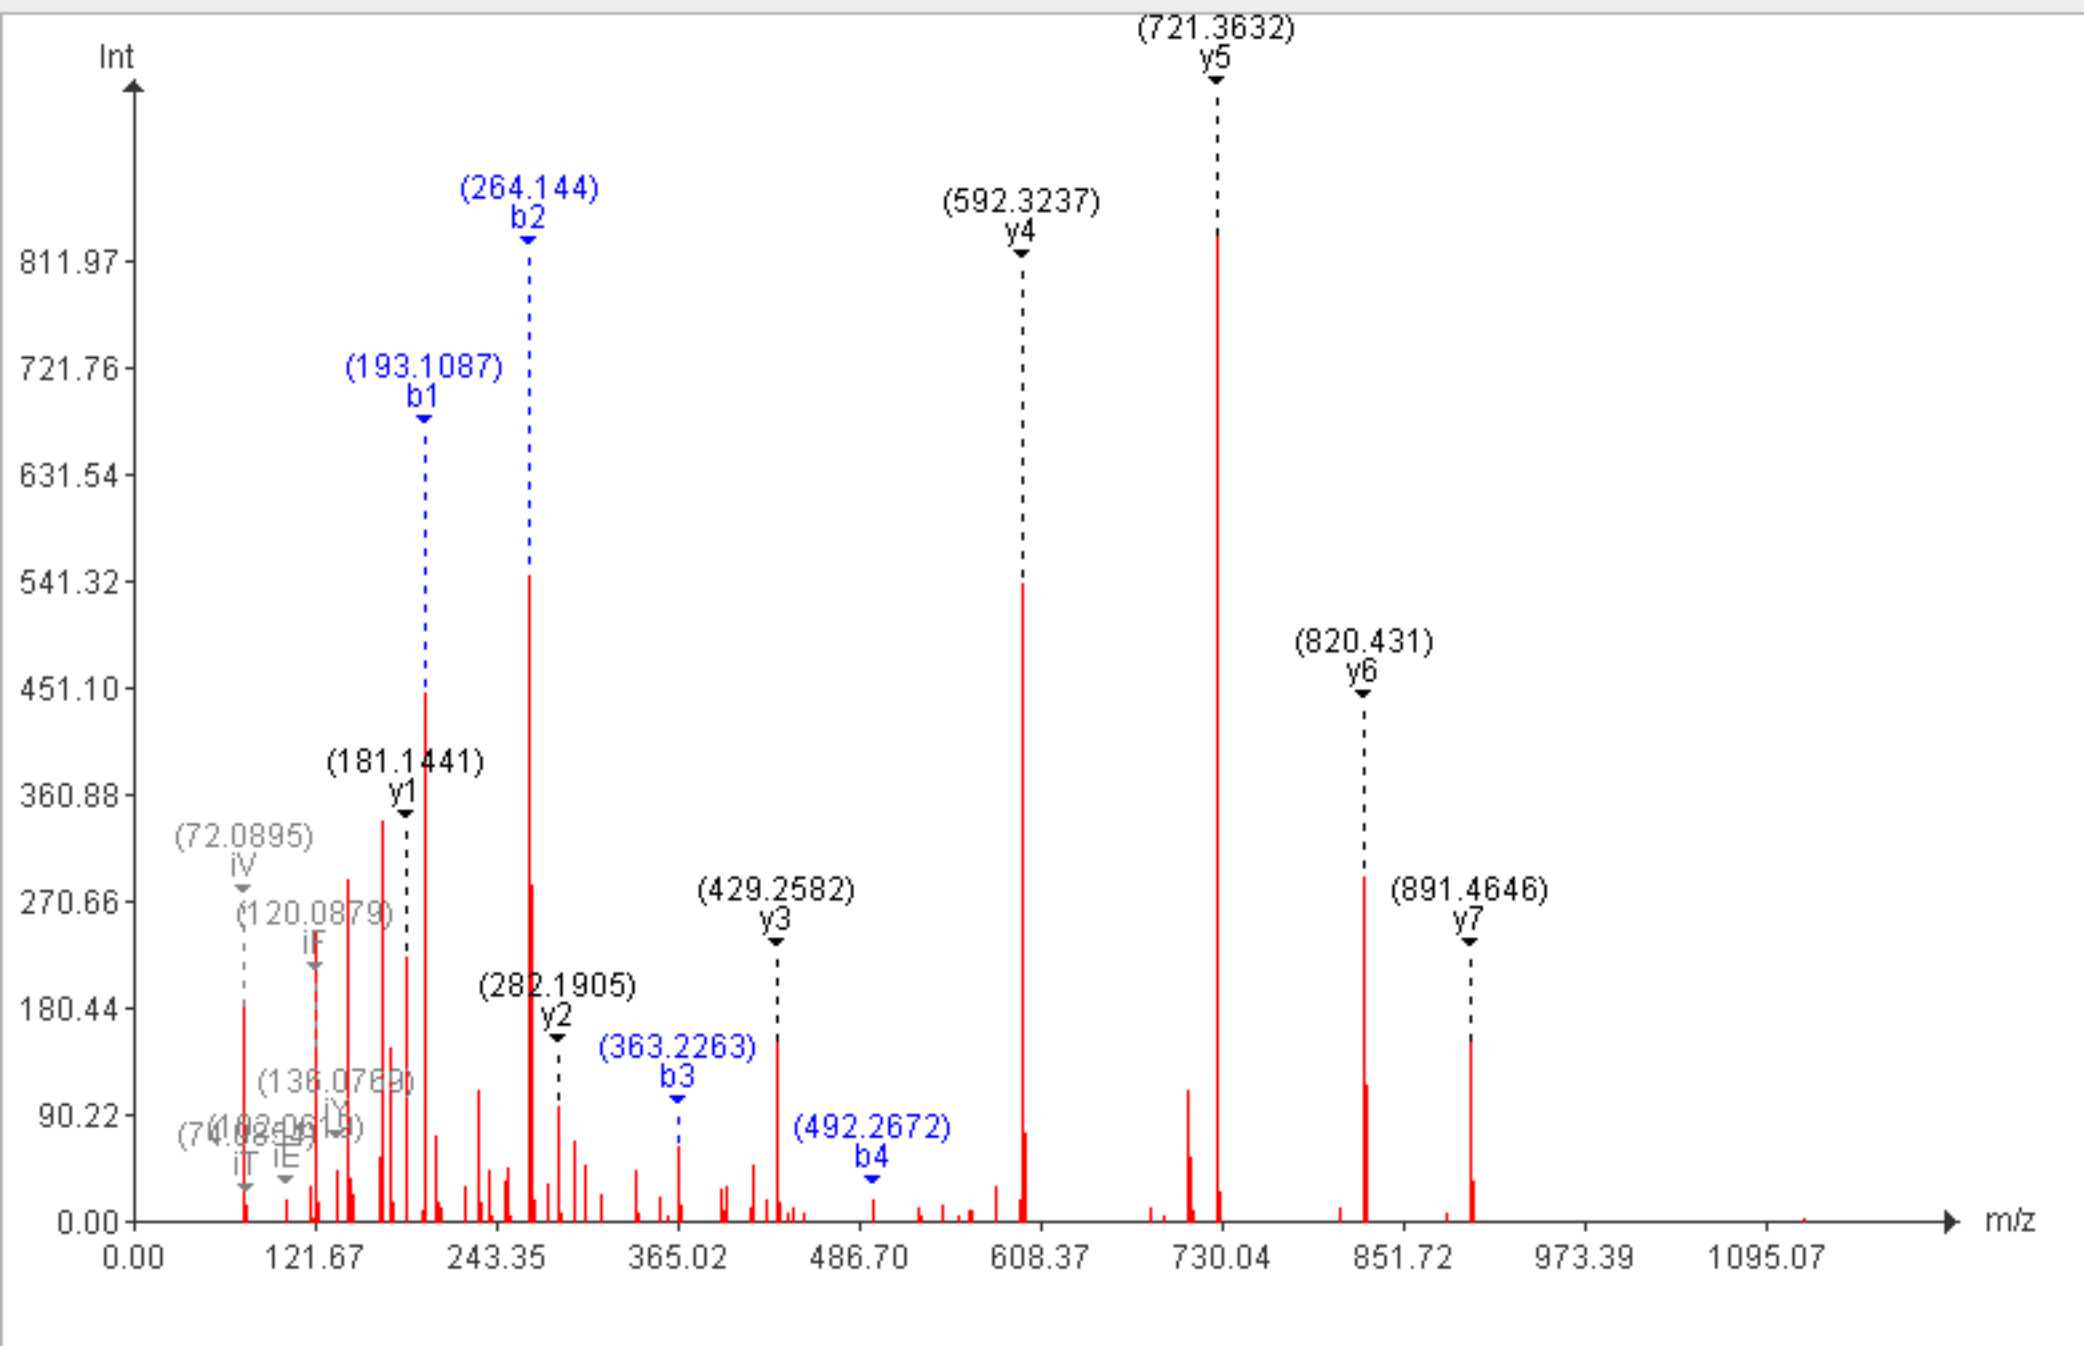

**AcD3-LGGAVSLGDPLLLPAASESR(C13\*)-COOH**  
**precursor mass: 987.5508 Da (charge: +2) protein: Q8C910 (36-55)**  
**score (threshold): 59.0 (31.0)**  
**instrument: Waters Q-TOF Premier**

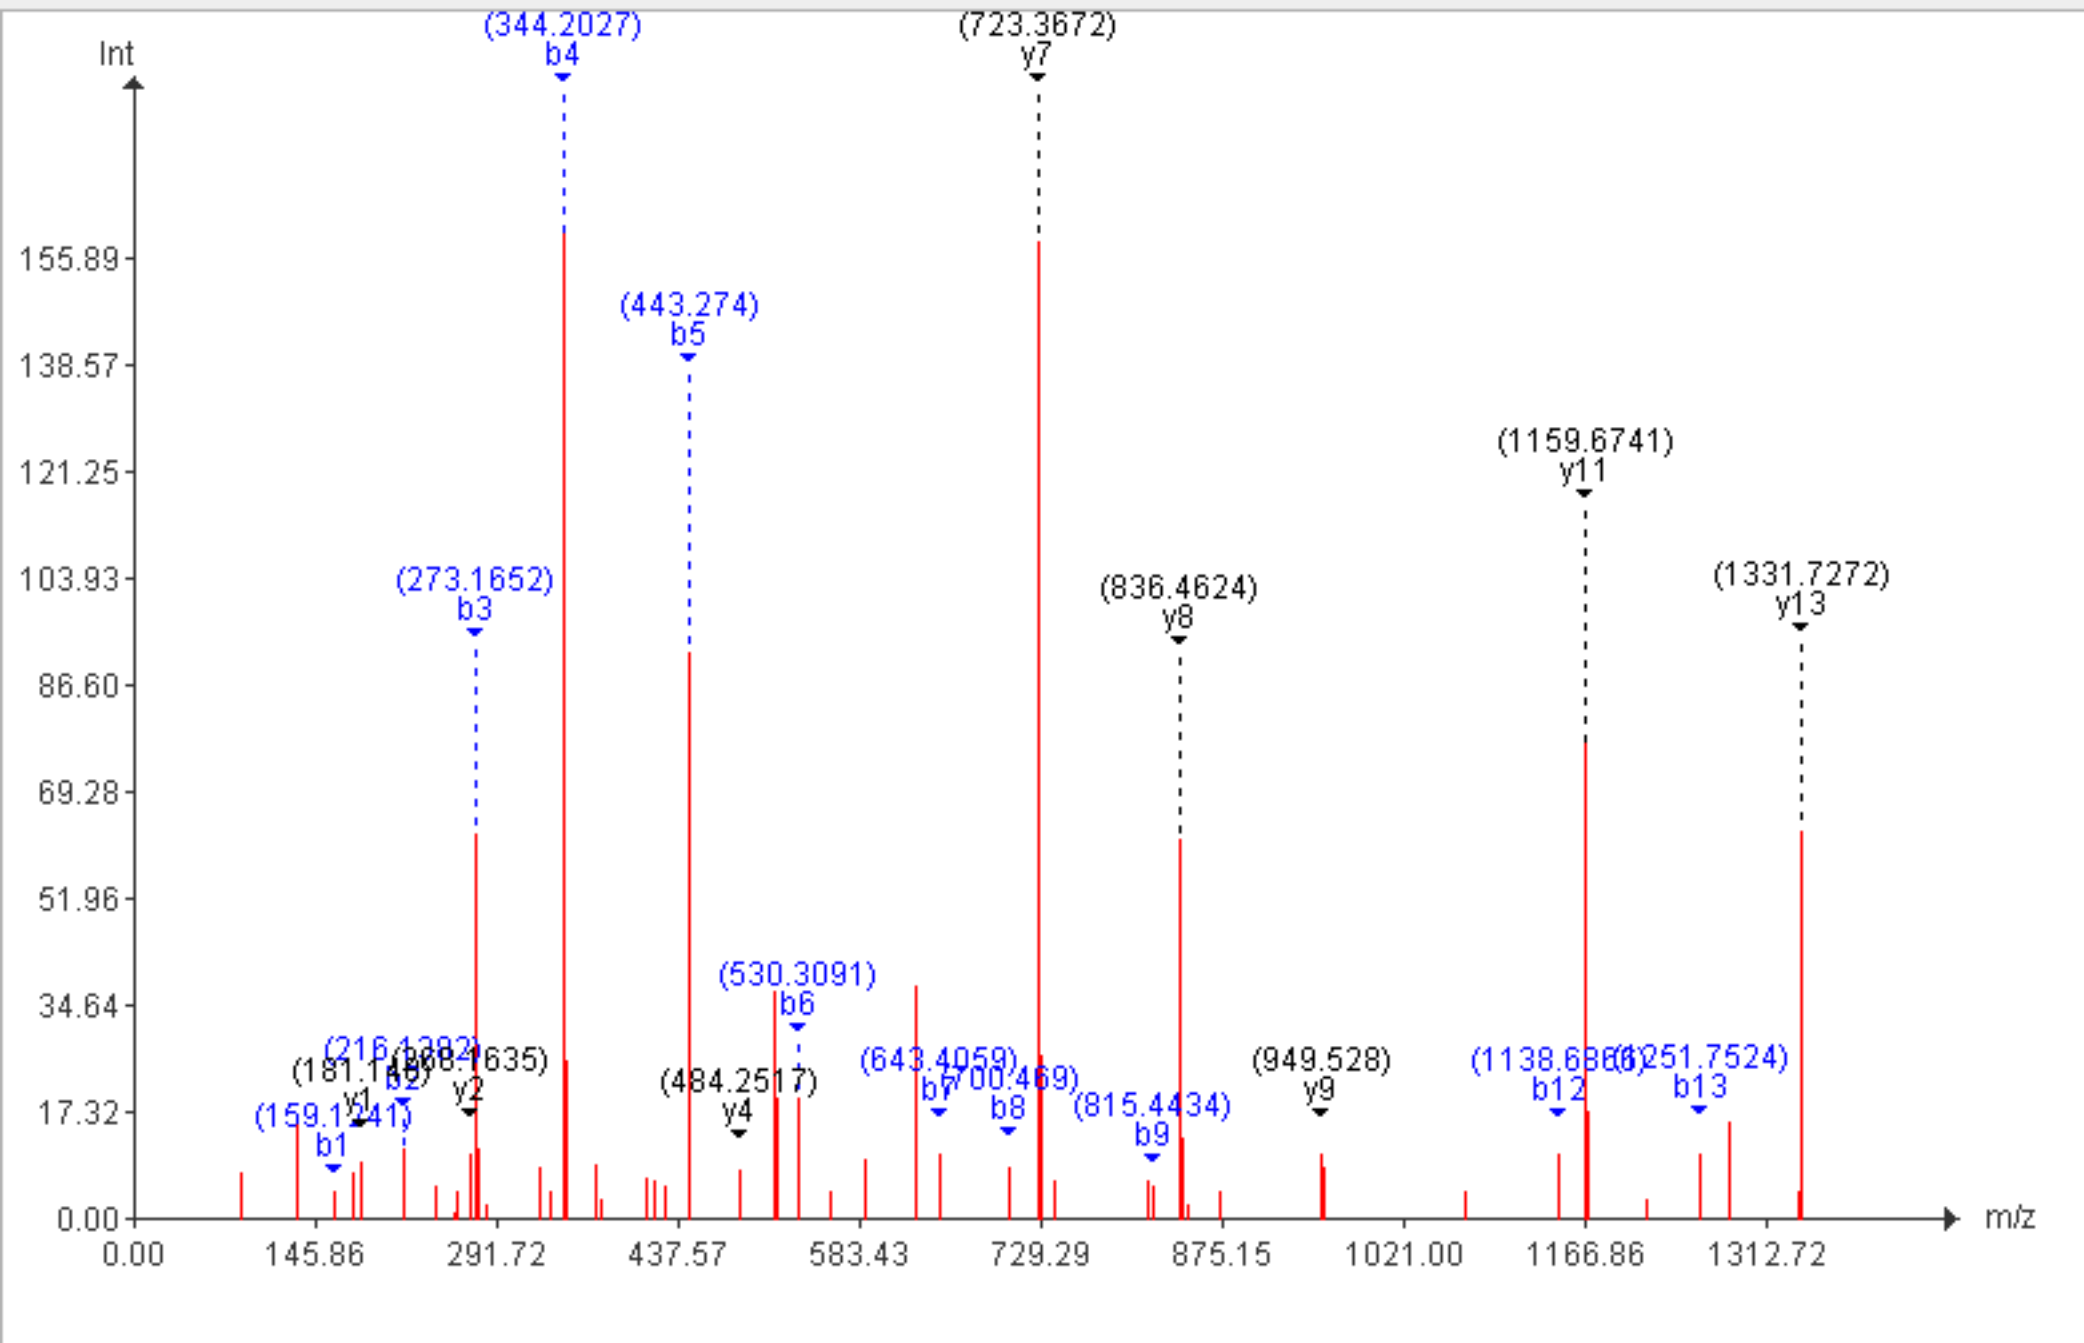

***AcD3-C(Cmm\*)LPGLAK(AcD3K\*)QPSFR(C13\*)-COOH***  
**precursor mass: 735.4077 Da (charge: +2) protein: P16675 (32-43)**  
**score (threshold): 52.0 (30.0)**  
**instrument: Waters Q-TOF Premier**

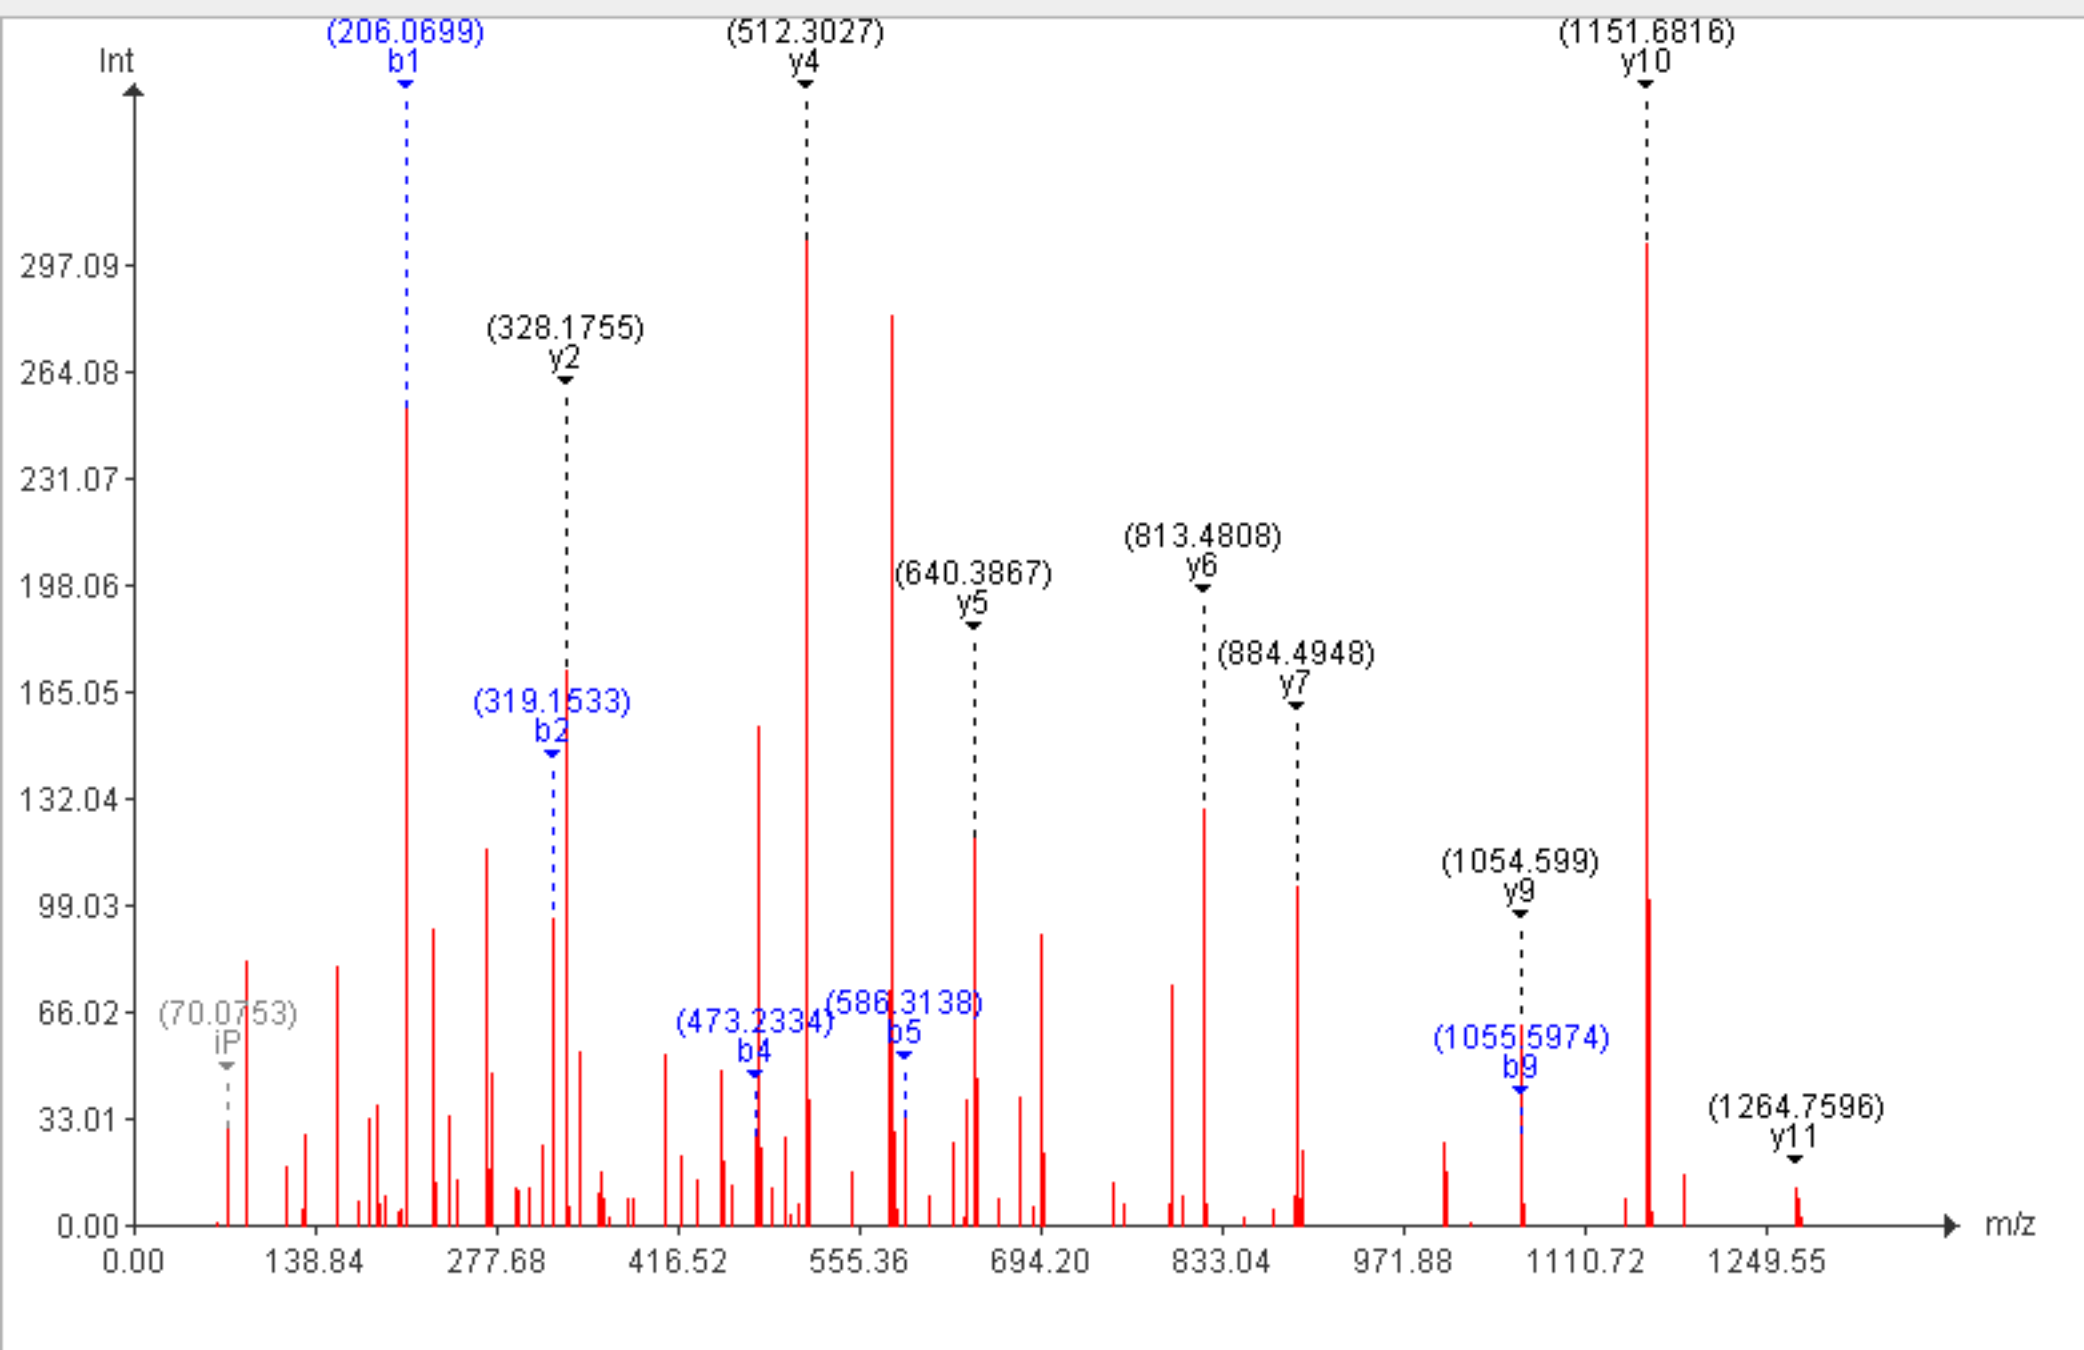

**AcD3-GEALSTLVLR(C13\*)-COOH**

**precursor mass: 612.3579 Da (charge: +2) protein: P63038 (280-290)**

**score (threshold): 62.0 (30.0)**

**instrument: Waters Q-TOF Premier**

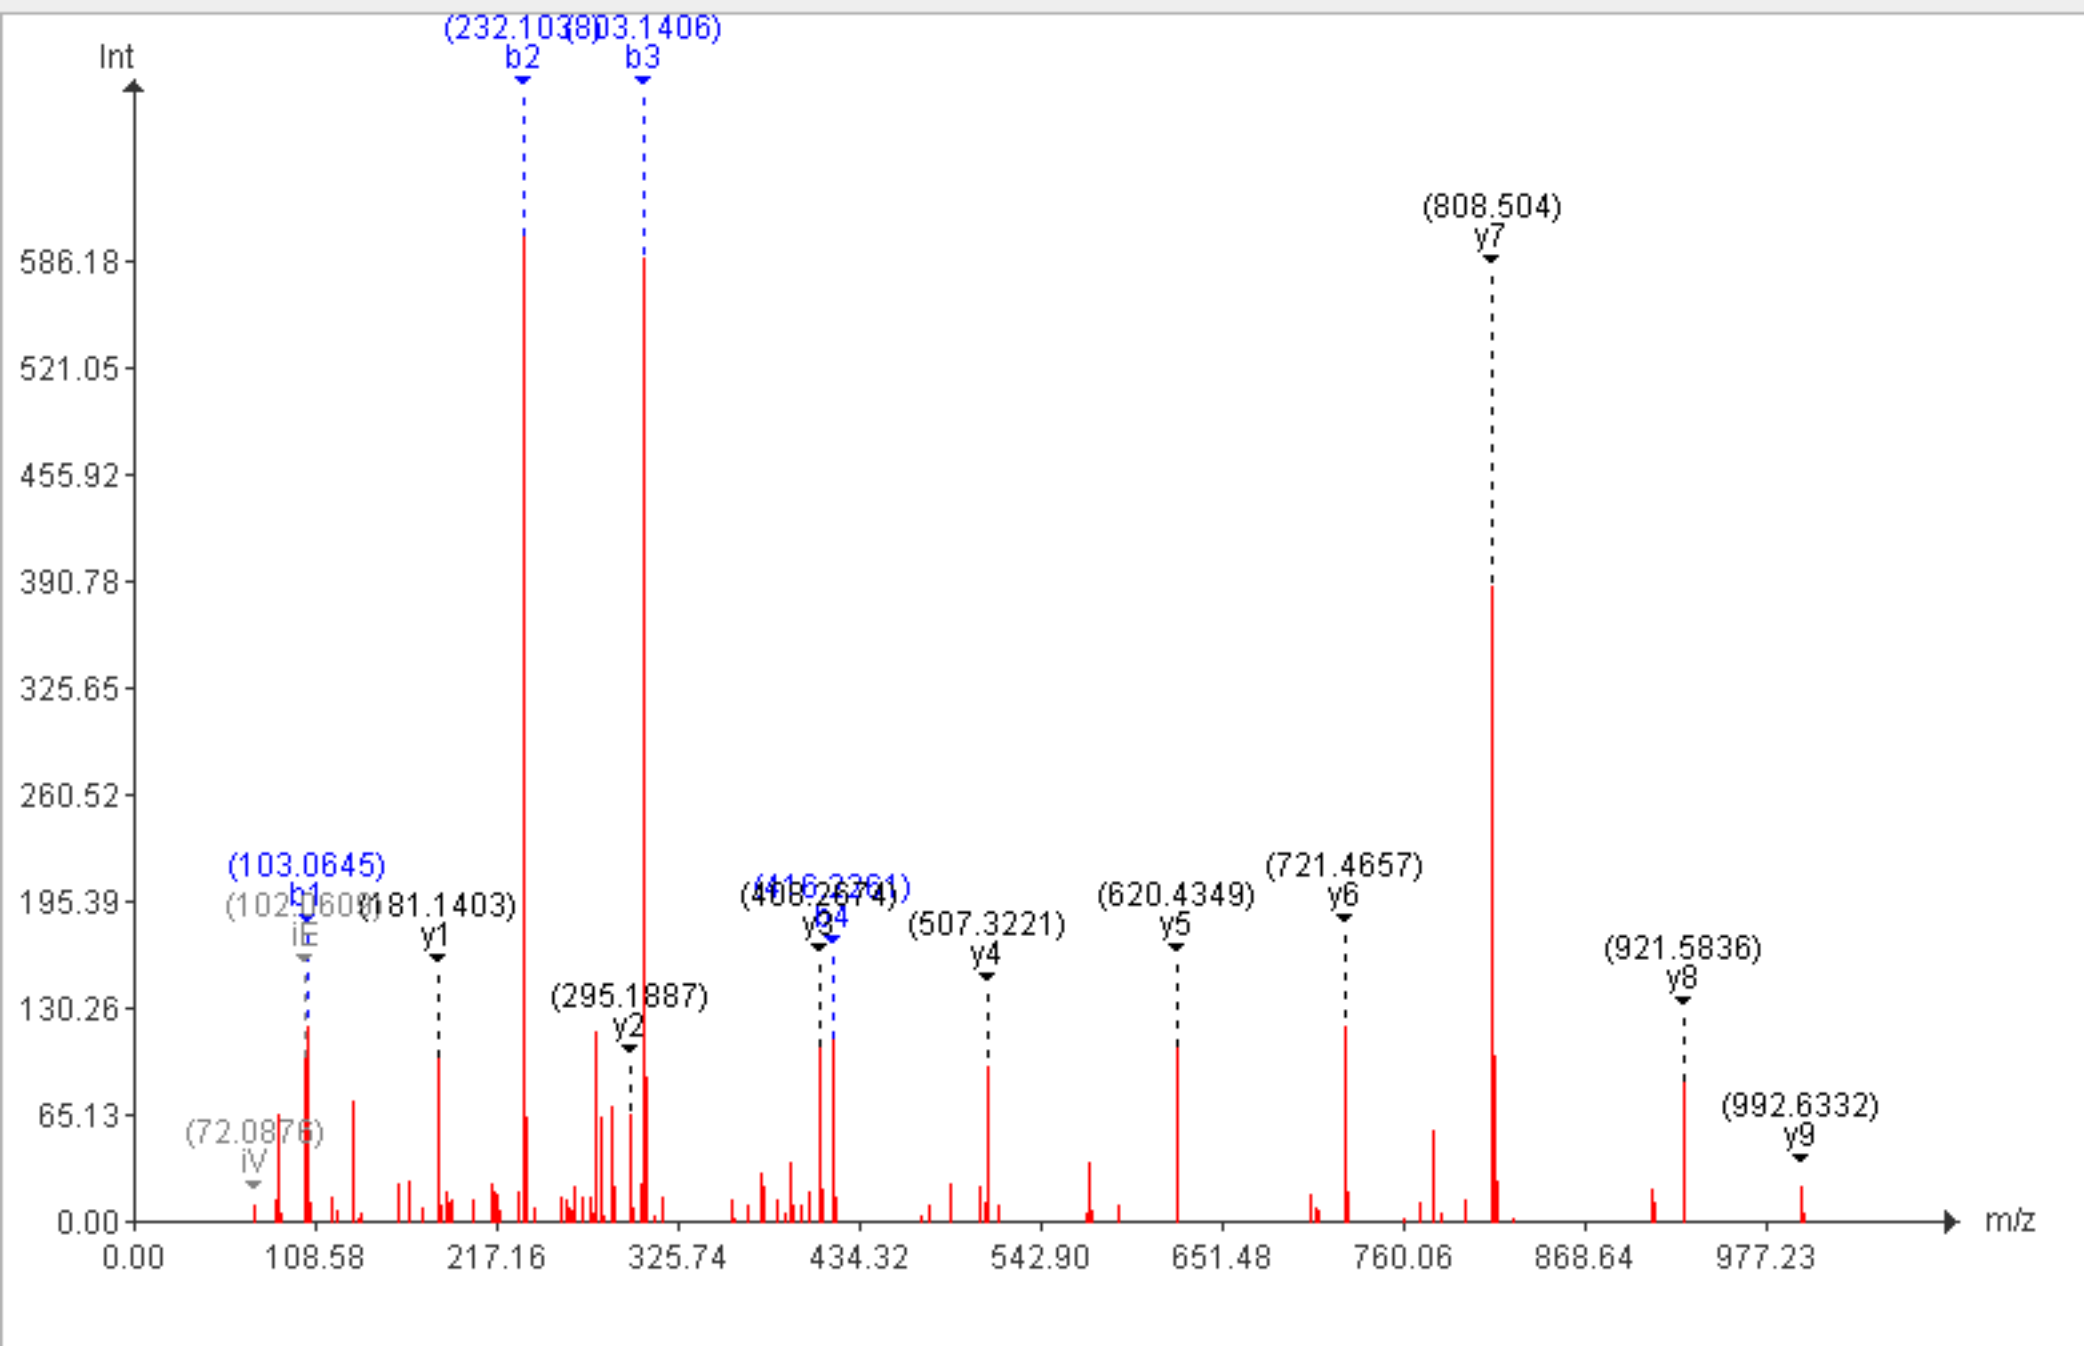

AcD3-GK(AcD3K\*)TLNDELEIIEGM(Mox\*)K(AcD3K\*)FDR(C13\*)-COOH

precursor mass: 755.7221 Da (charge: +3) protein: P63038 (204-221)

score (threshold): 50.0 (30.0)

instrument: Waters Q-TOF Premier

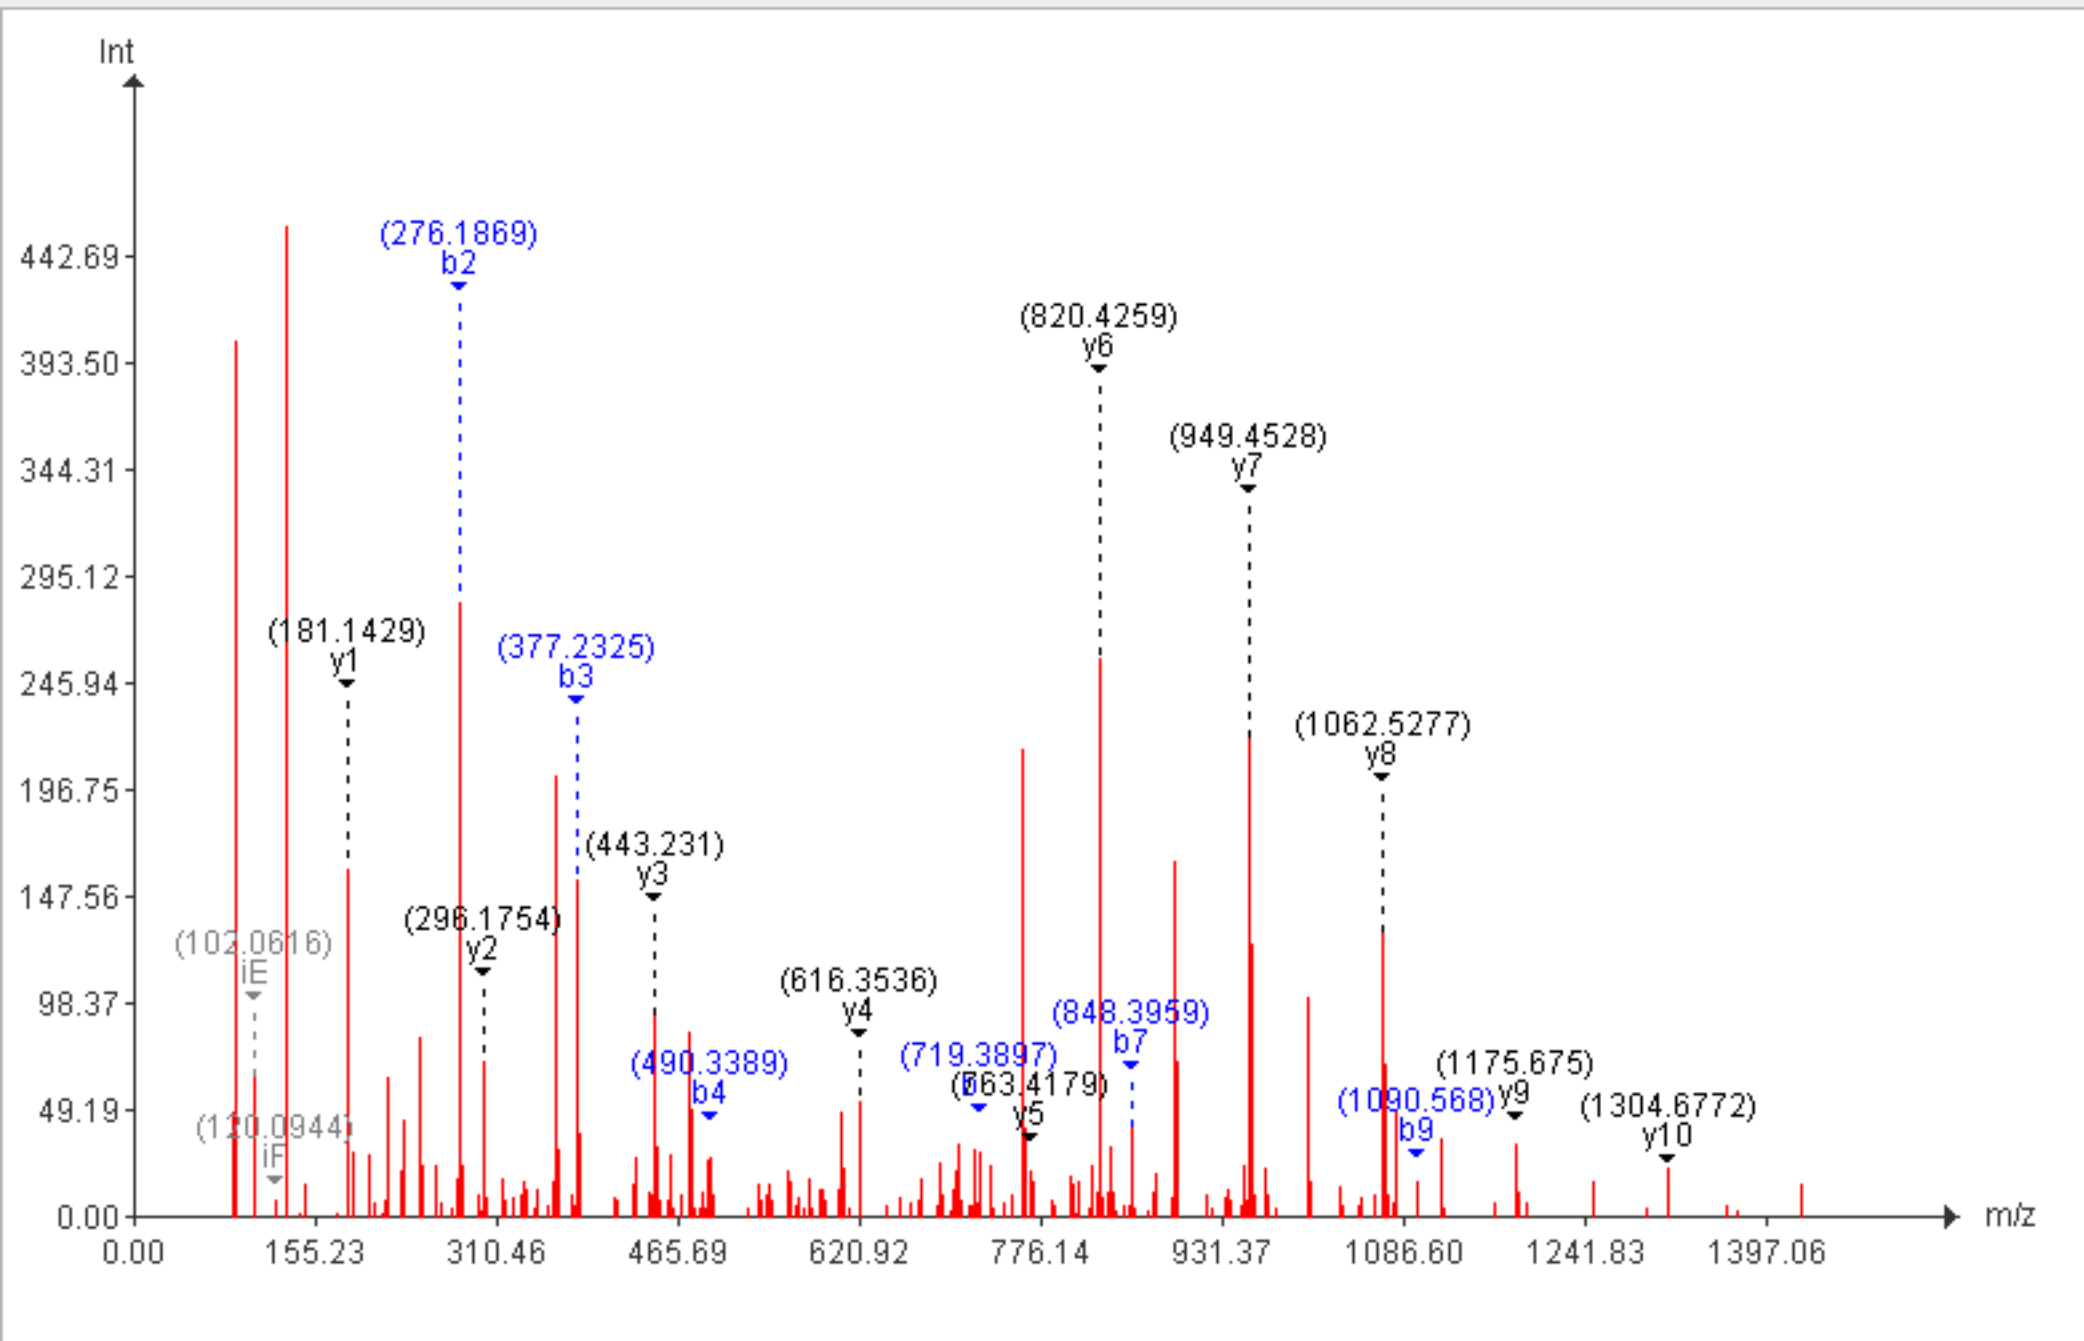

**AcD3-GADC(Cmm\*)IM(Mox\*)LSGETAK(AcD3K\*)GDYPLEAVR-COOH**

**precursor mass: 820.3886 Da (charge: +3) protein: P52480 (355-376)**

**score (threshold): 71.0 (30.0)**

**instrument: Waters Q-TOF Premier**

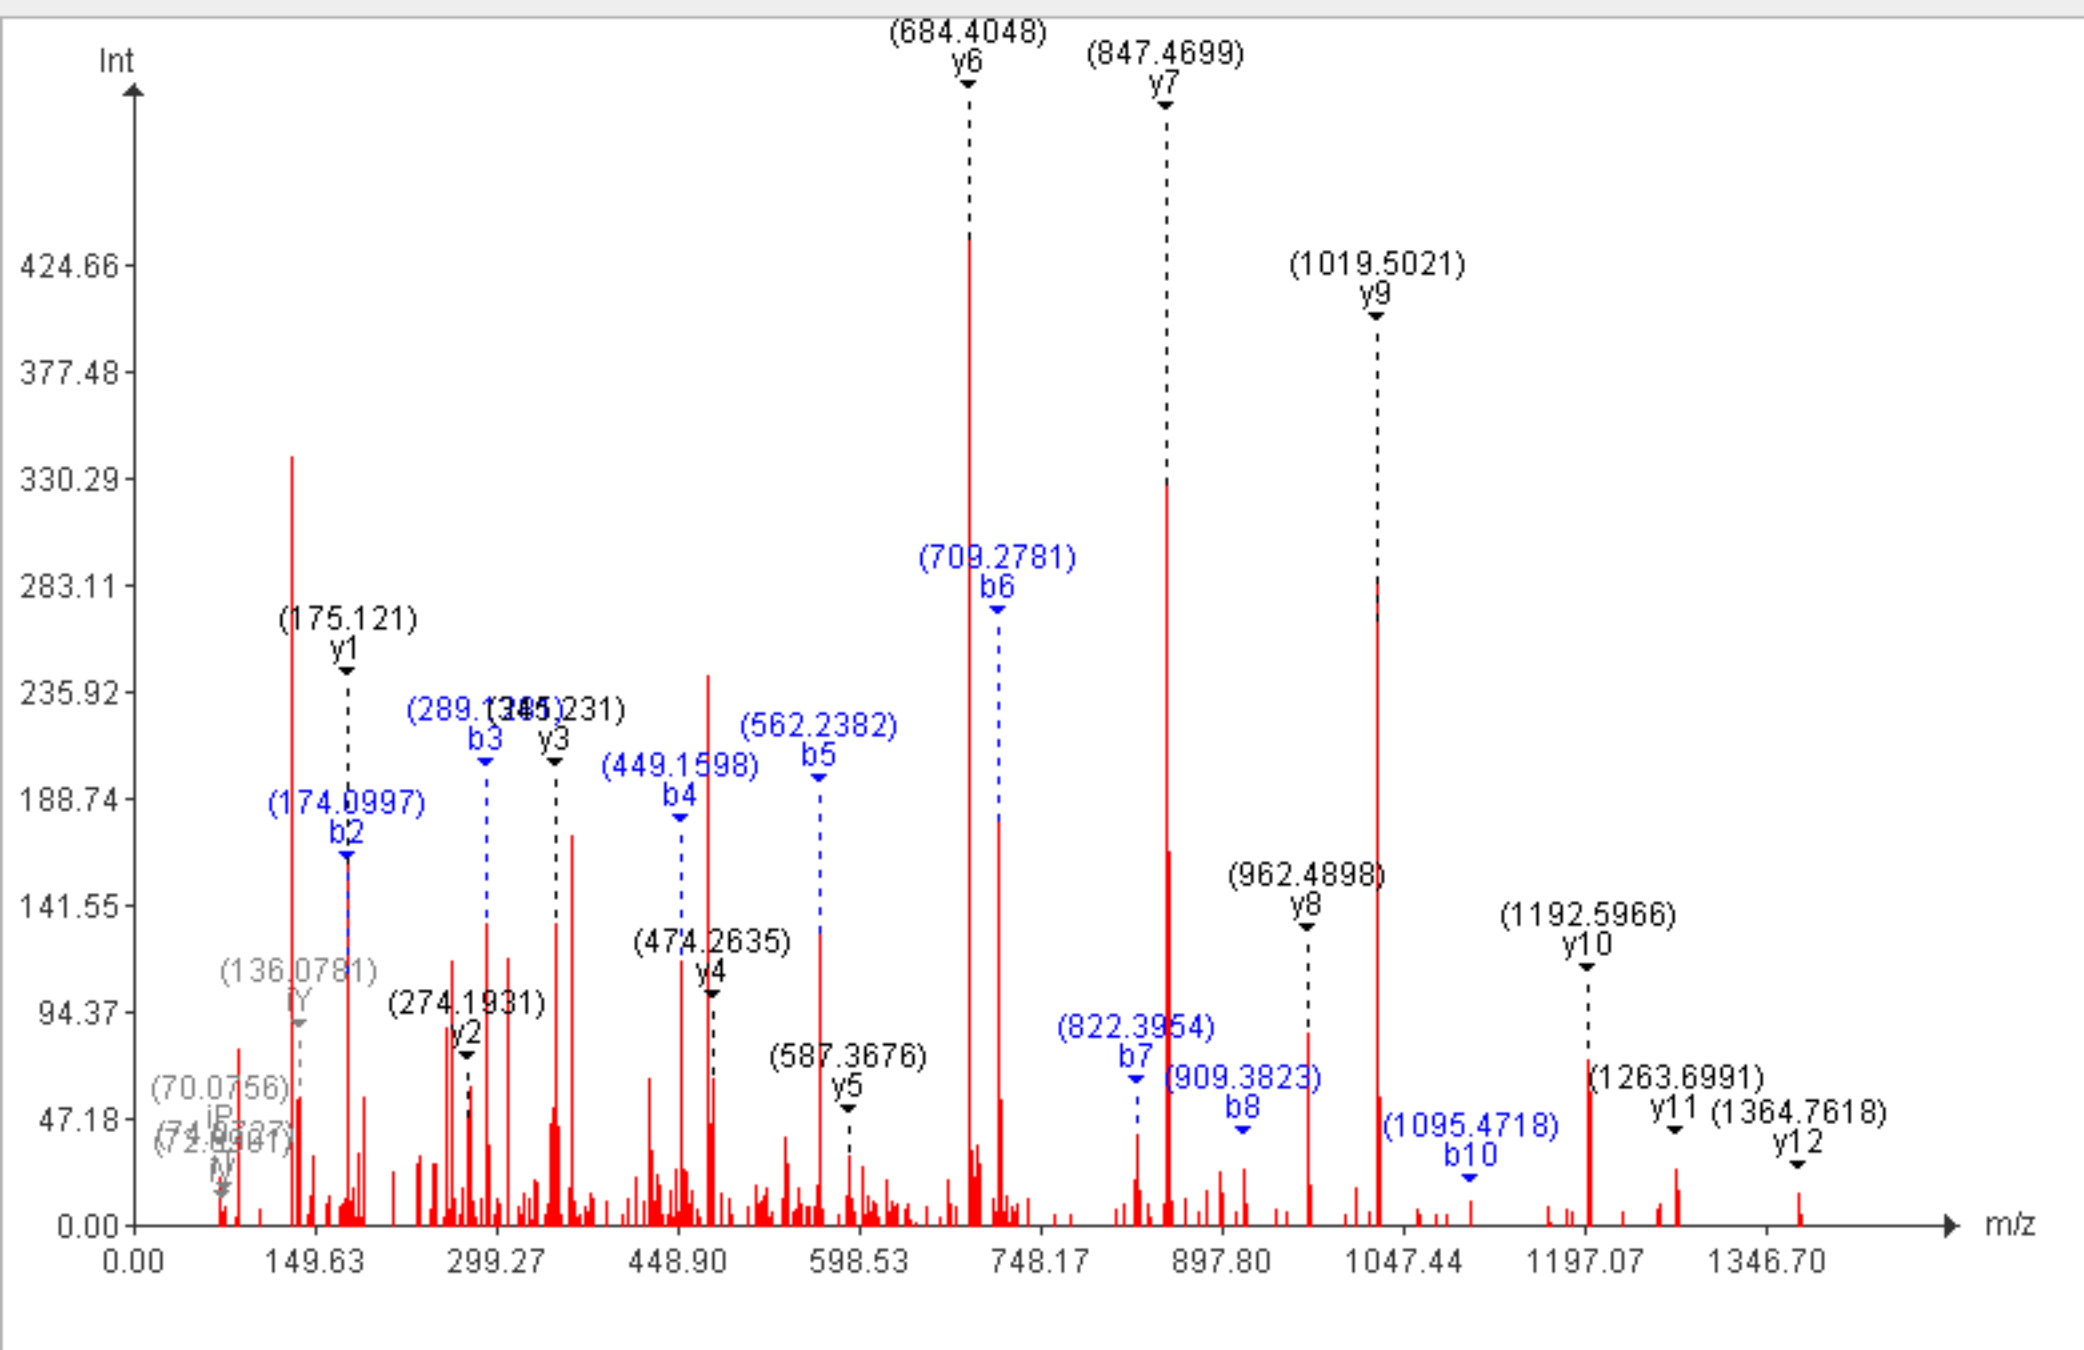



**AcD3-GK(AcD3K\*)VTYGQK(AcD3K\*)R-COOH**

**precursor mass: 586.3380 Da (charge: +2) protein: Q91VR5 (686-694)**

**score (threshold): 44.0 (30.0)**

**instrument: Waters Q-TOF Premier**

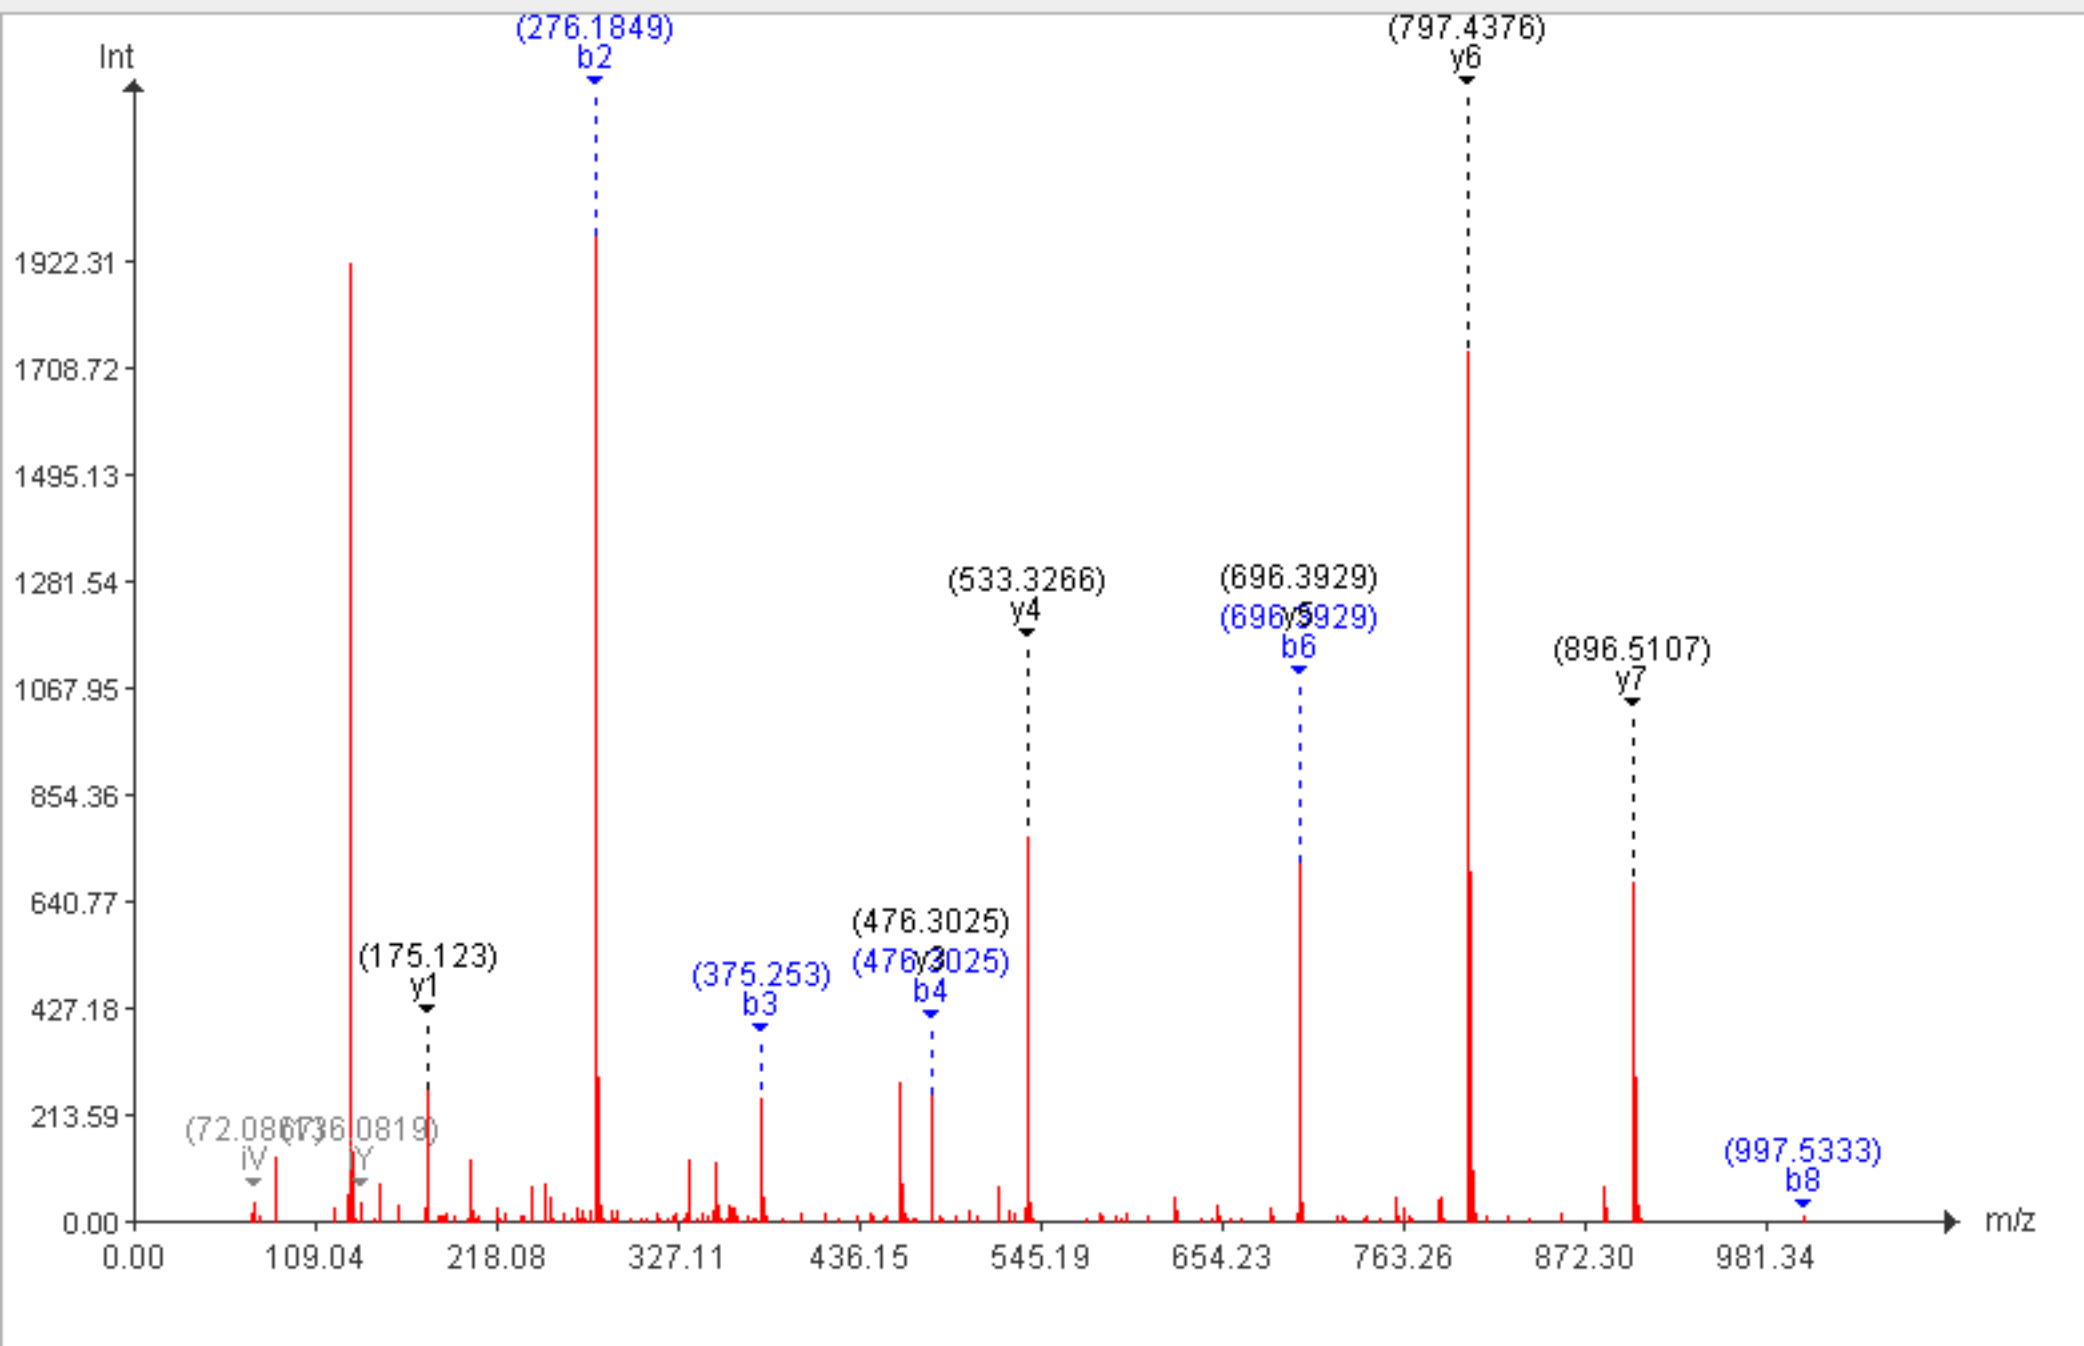

**AcD3-SGPPAK(AcD3K\*)K(AcD3K\*)IR(C13\*)-COOH**  
**precursor mass: 547.8477 Da (charge: +2) protein: Q80XU3 (30-38)**  
**score (threshold): 71.0 (30.0)**  
**instrument: Waters Q-TOF Premier**

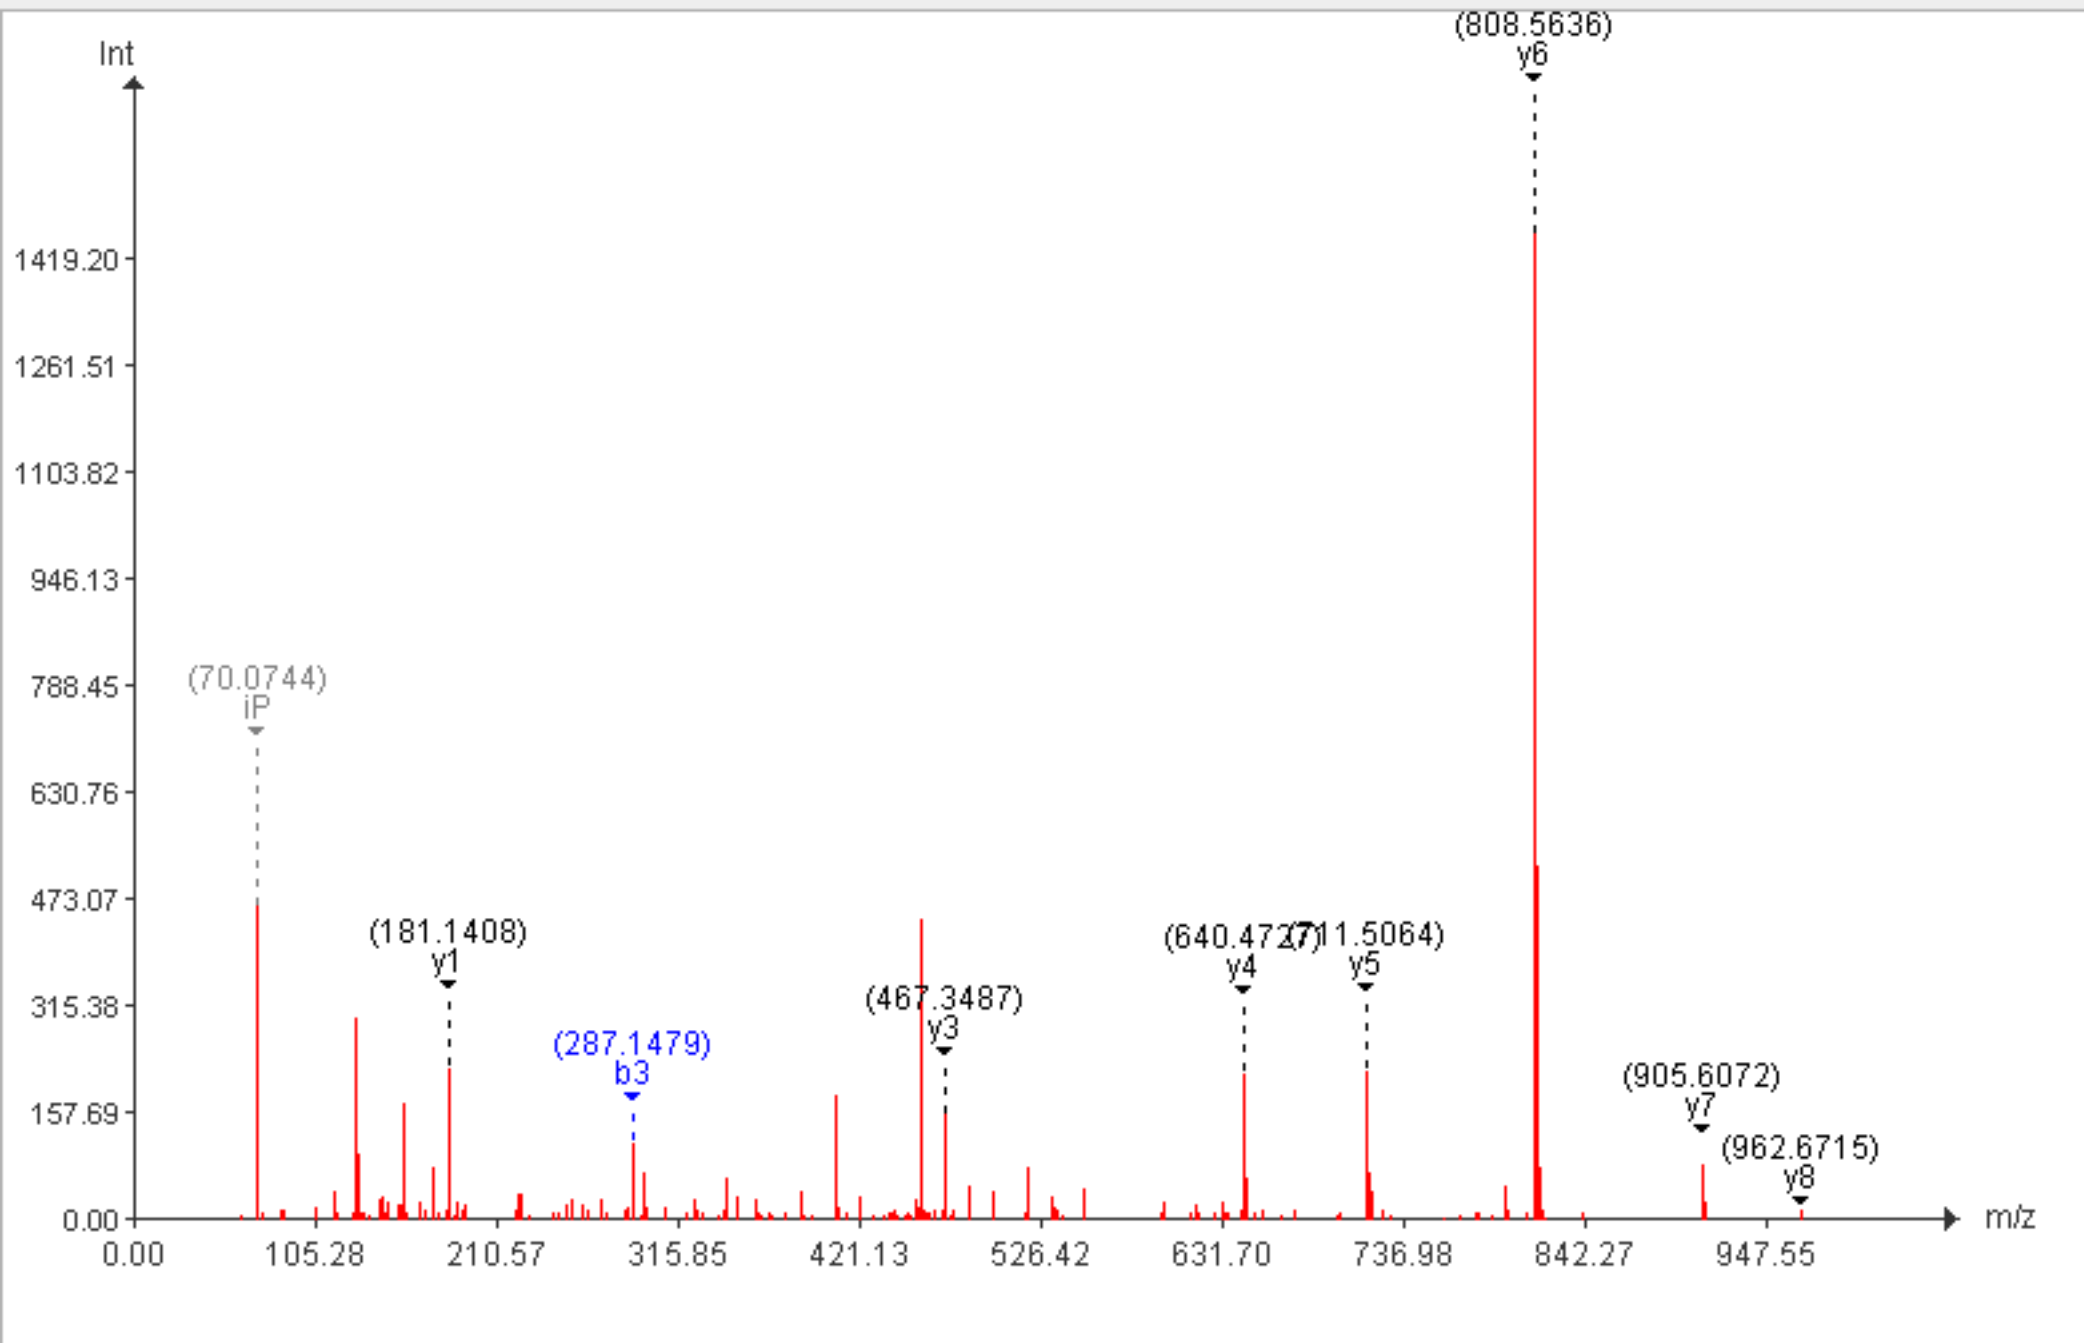

**AcD3-TPAK(AcD3K\*)NAQK(AcD3K\*)SNQN(Dam)GK(AcD3K\*)DLK(AcD3K\*)PSTPR-COOH**

**precursor mass: 869.4599 Da (charge: +3) protein: Q61937 (198-219)**

**score (threshold): 69.0 (30.0)**

**instrument: Waters Q-TOF Premier**

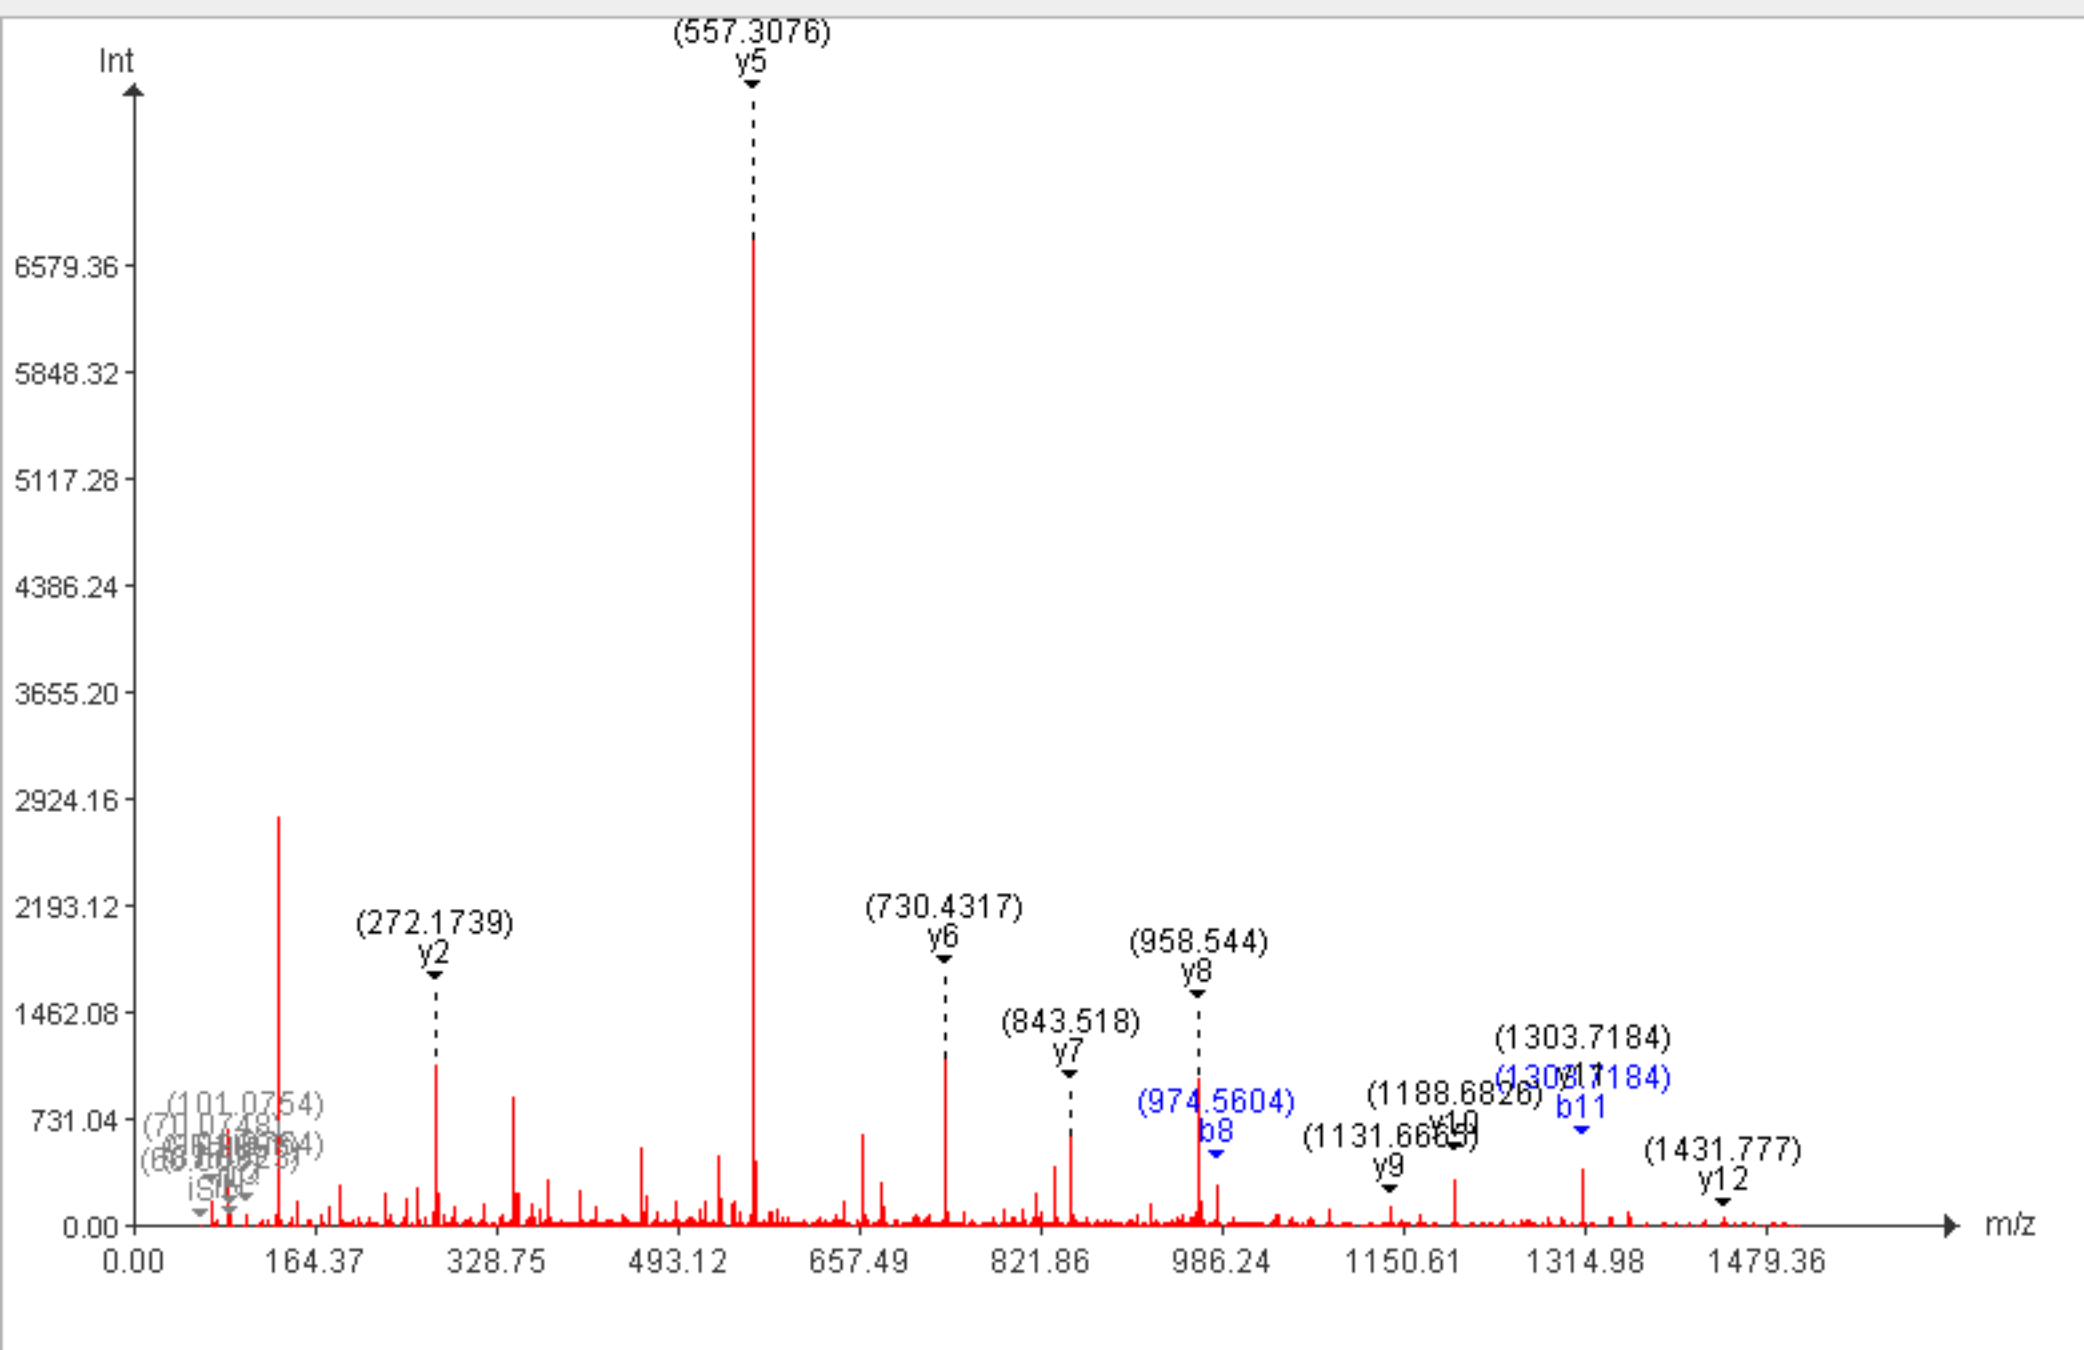

**AcD3-AK(AcD3K\*)AEFEFNIEK(AcD3K\*)GR(C13\*)-COOH**  
**precursor mass: 831.4399 Da (charge: +2) protein: P50518 (32-44)**  
**score (threshold): 99.0 (30.0)**  
**instrument: Waters Q-TOF Premier**

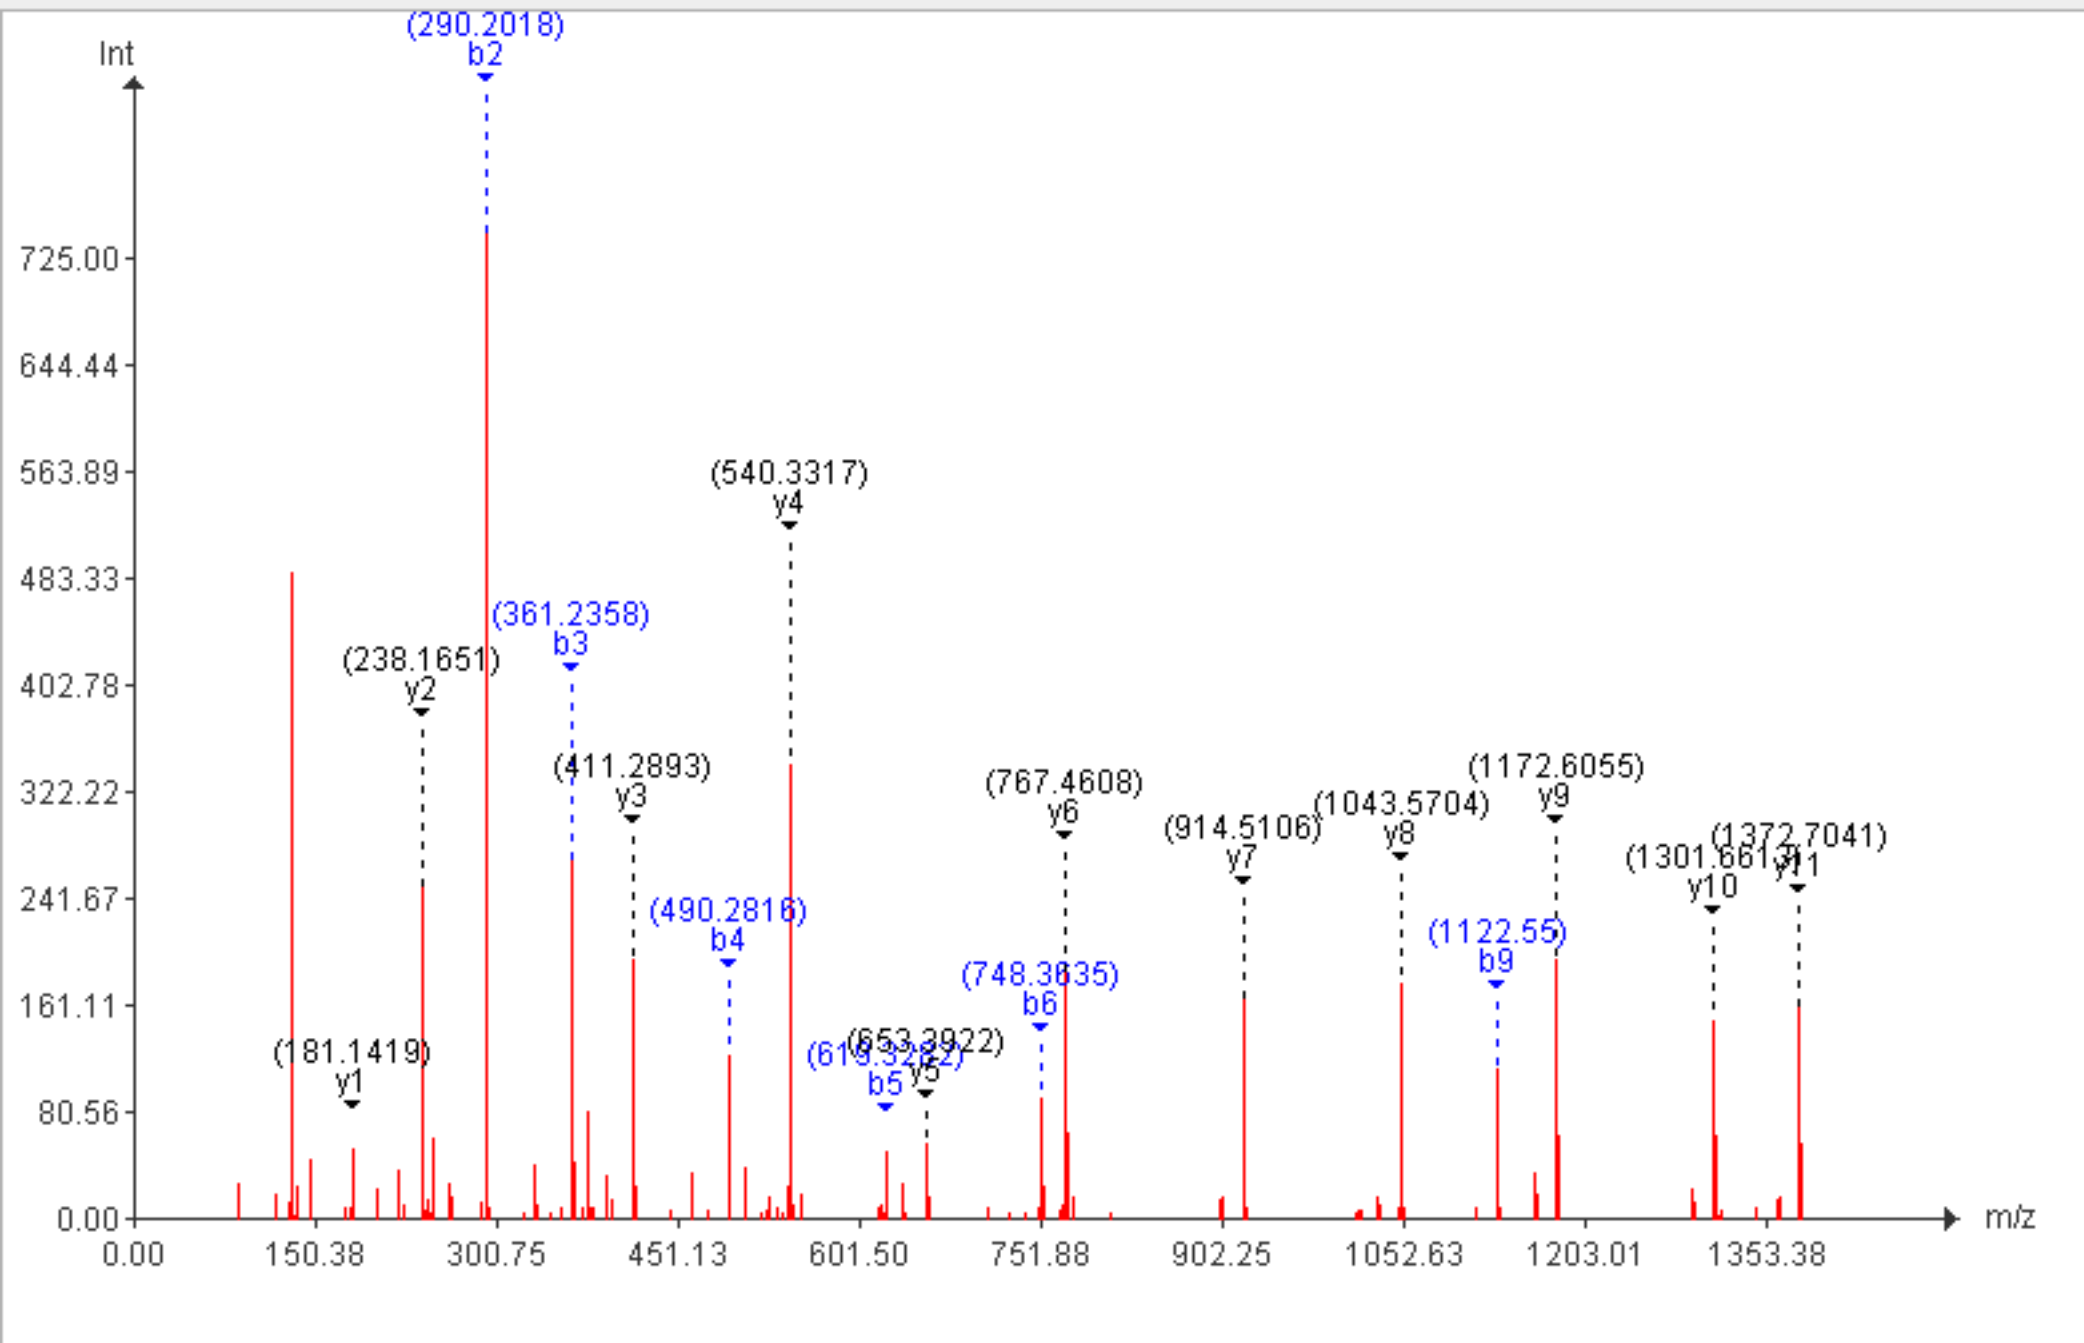

**AcD3-ASSAVK(AcD3K\*)VK(AcD3K\*)R(C13\*)-COOH**  
**precursor mass: 543.8462 Da (charge: +2) protein: Q921F2 (90-98)**  
**score (threshold): 71.0 (30.0)**  
**instrument: Waters Q-TOF Premier**

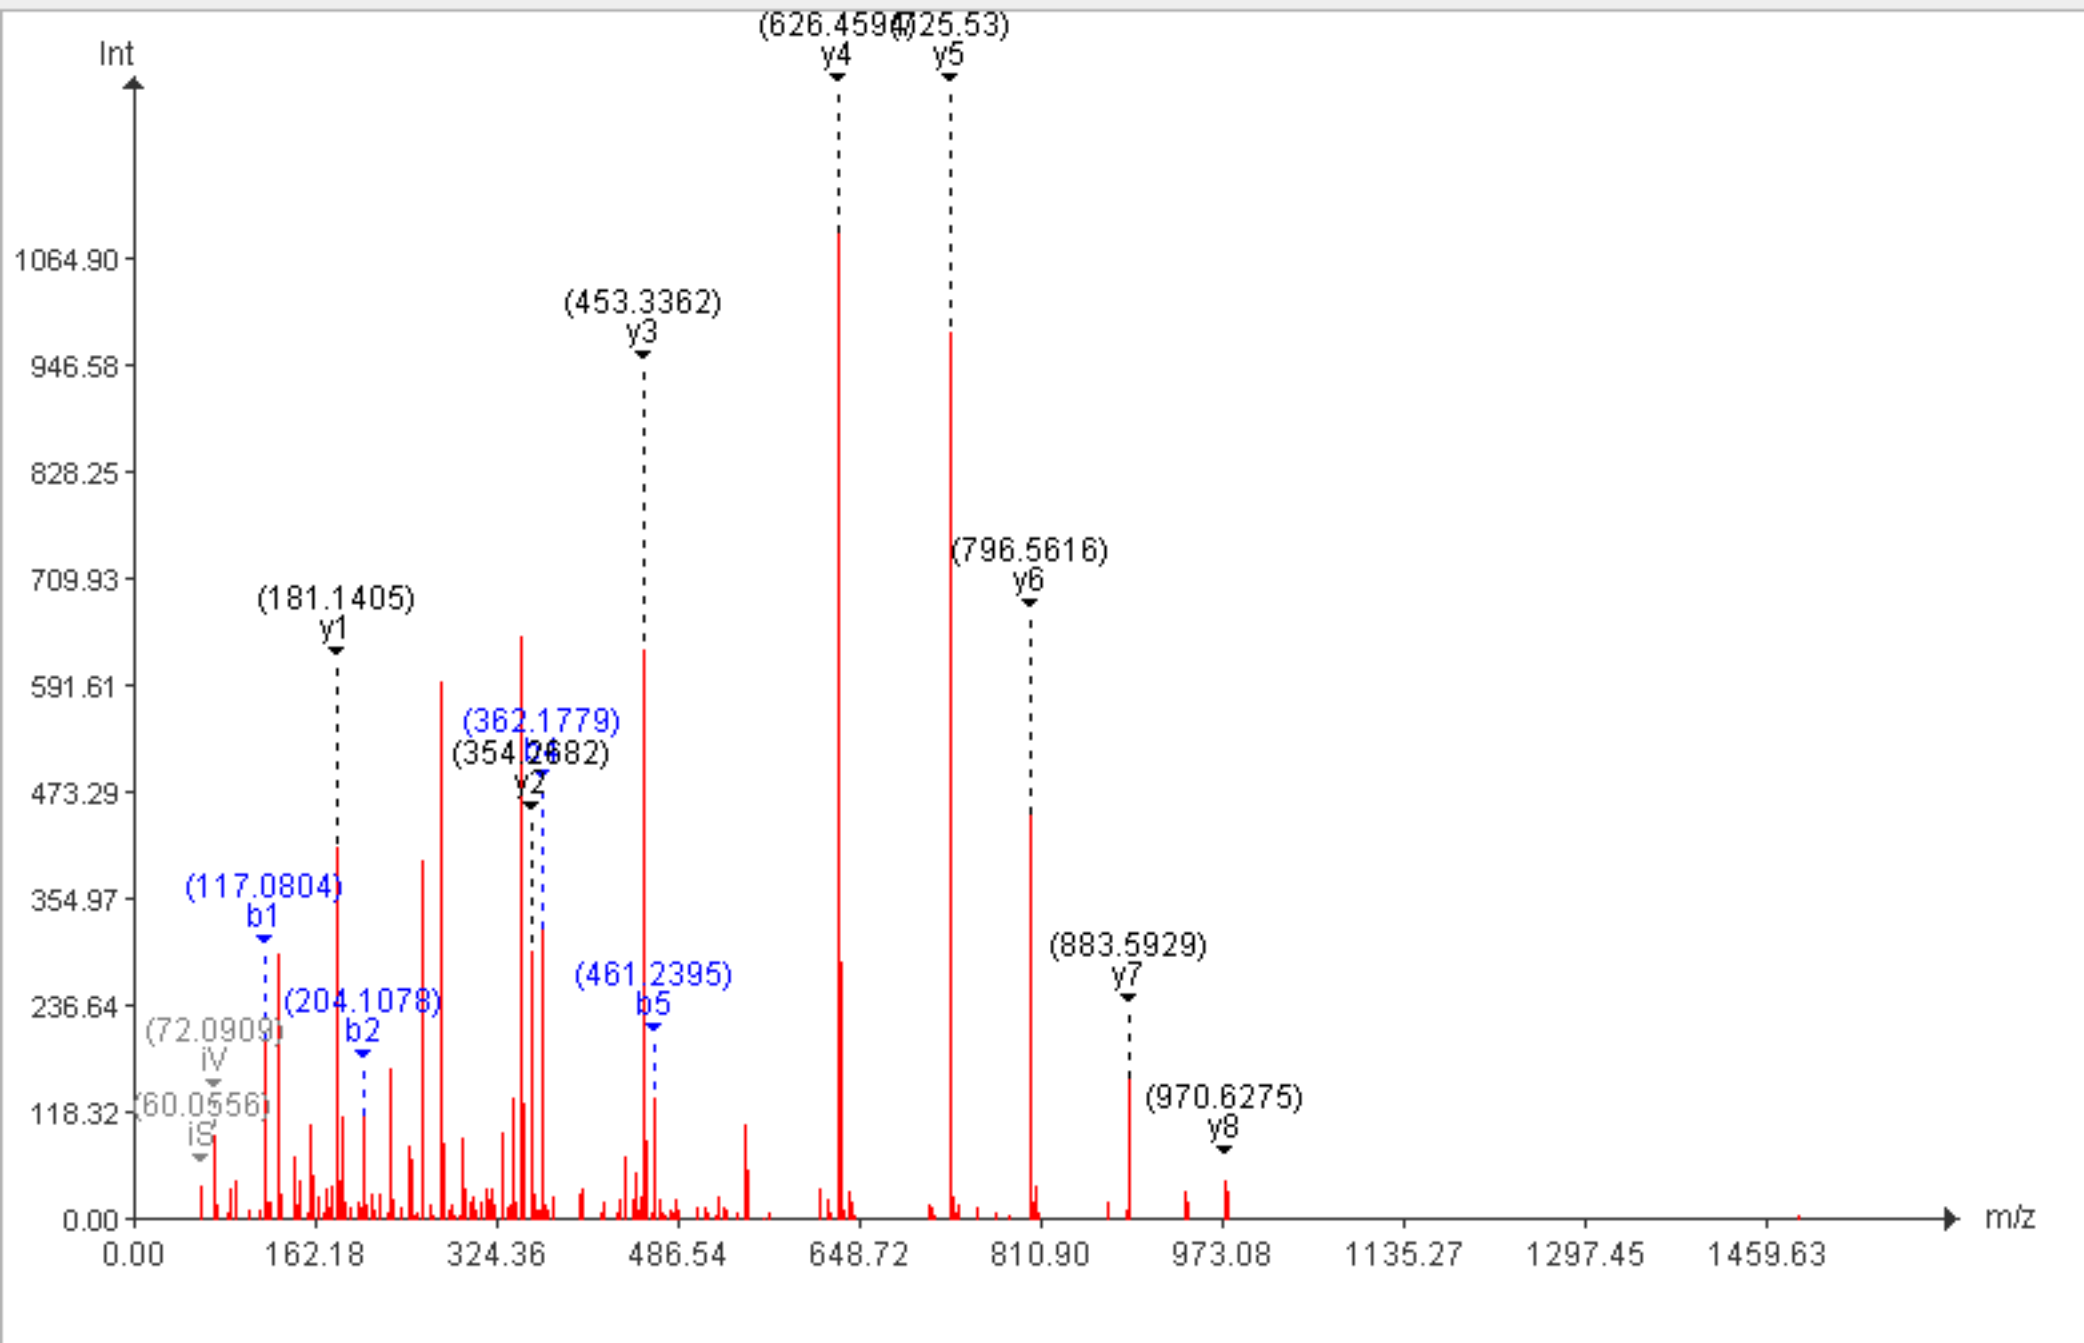

**AcD3-AGM(Mox<sup>+</sup>)AM(Mox<sup>+</sup>)AGQSPVLR-COOH**  
**precursor mass: 683.3322 Da (charge: +2) protein: P17225 (172-184)**  
**score (threshold): 57.0 (31.0)**  
**instrument: Waters Q-TOF Premier**

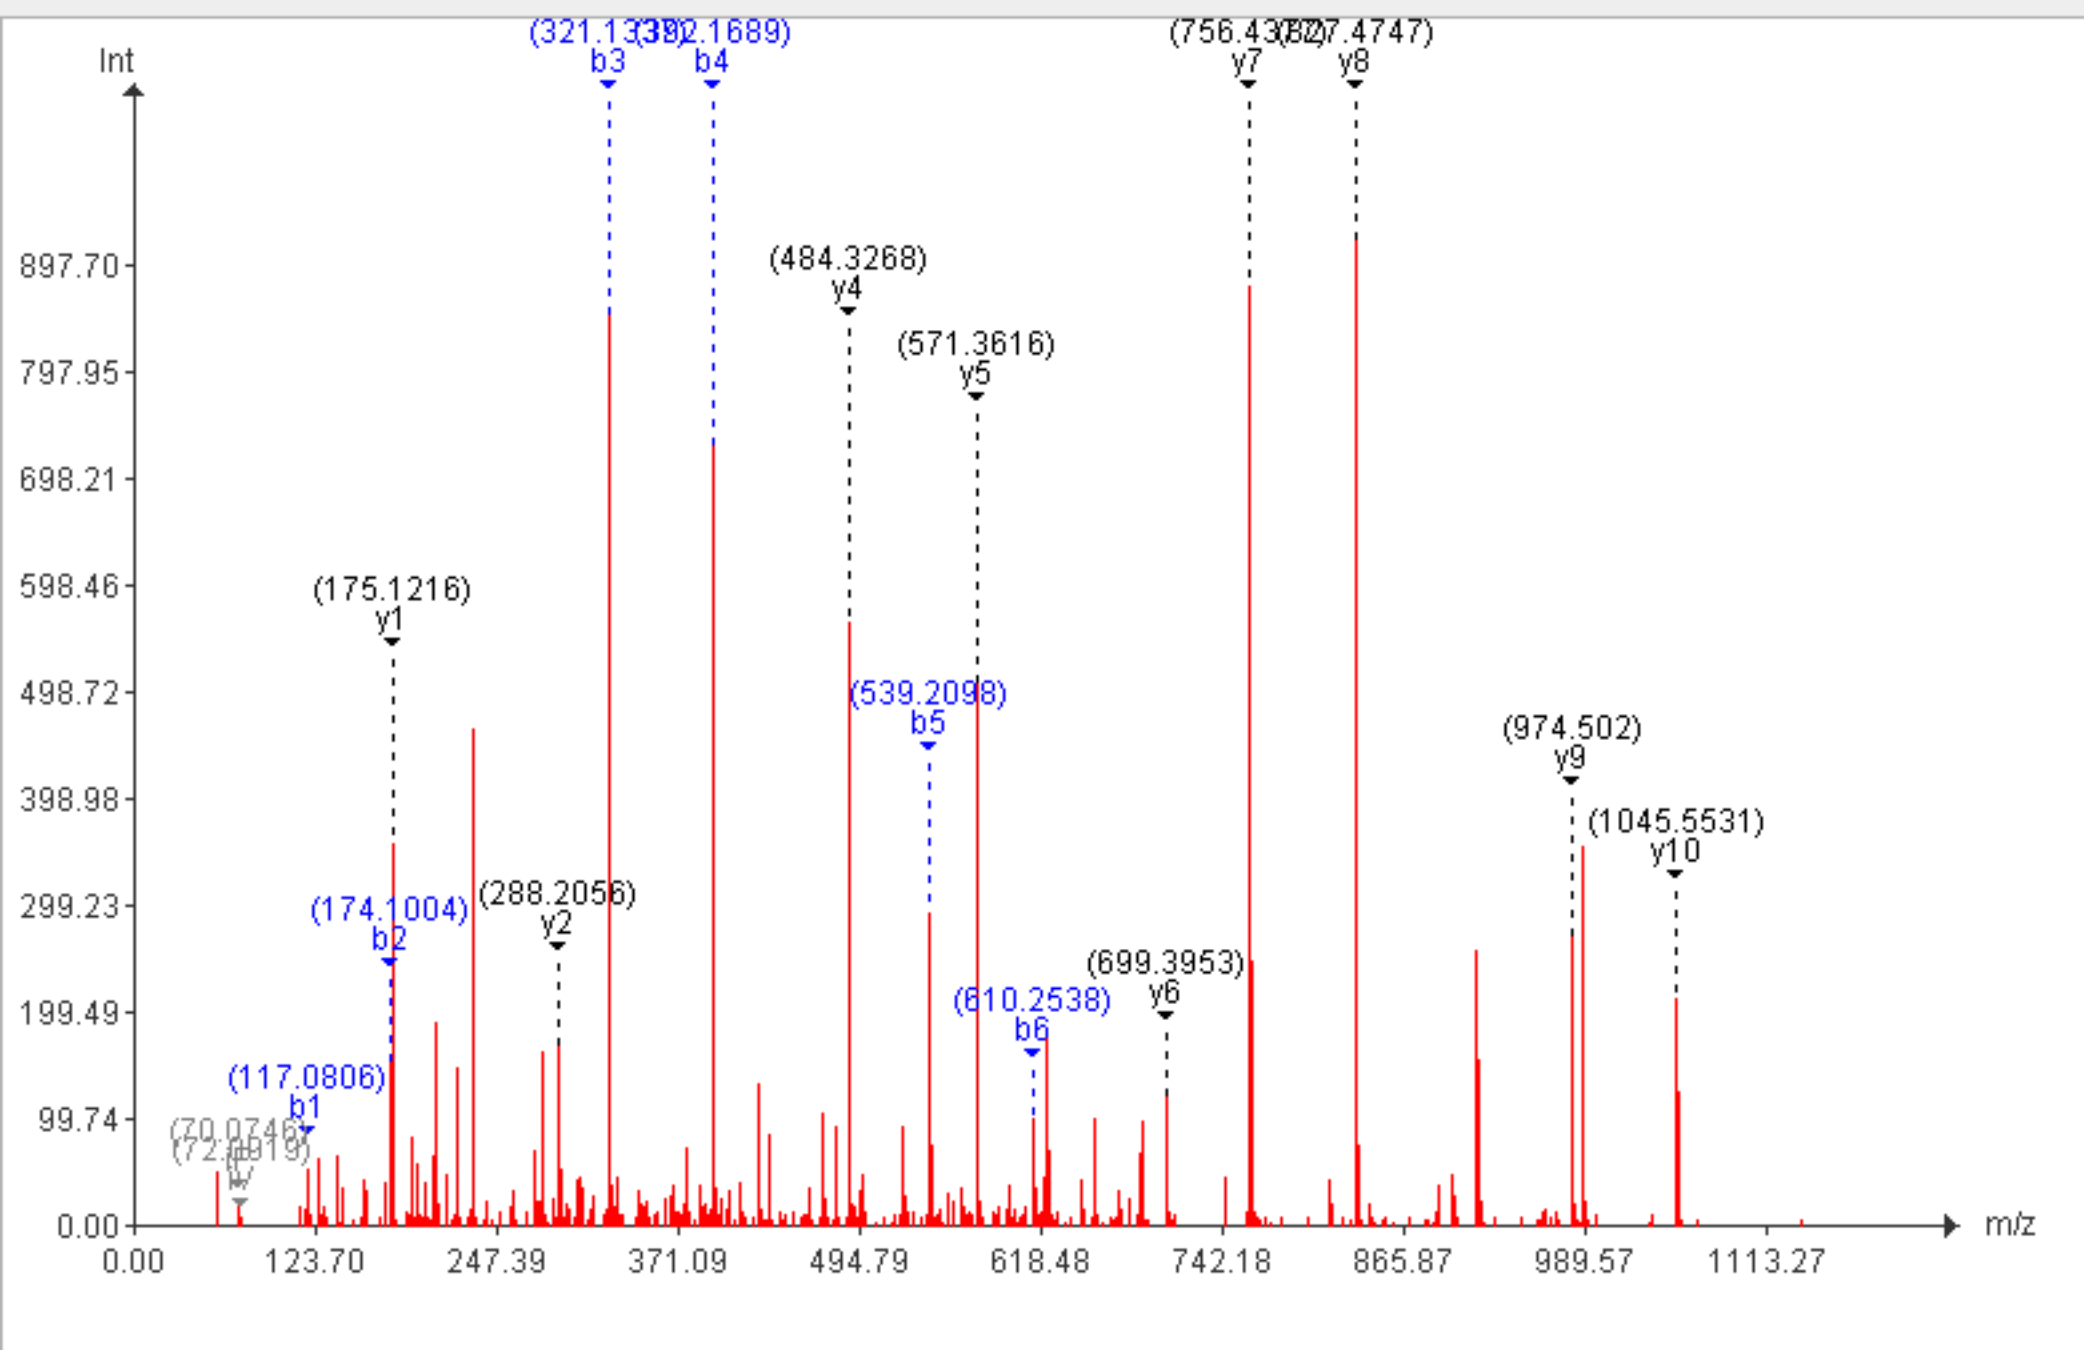

**AcD3-GLNASQIR(C13\*)-COOH**

**precursor mass: 455.2632 Da (charge: +2) protein: P08113 (60-67)**

**score (threshold): 54.0 (31.0)**

**instrument: Waters Q-TOF Premier**

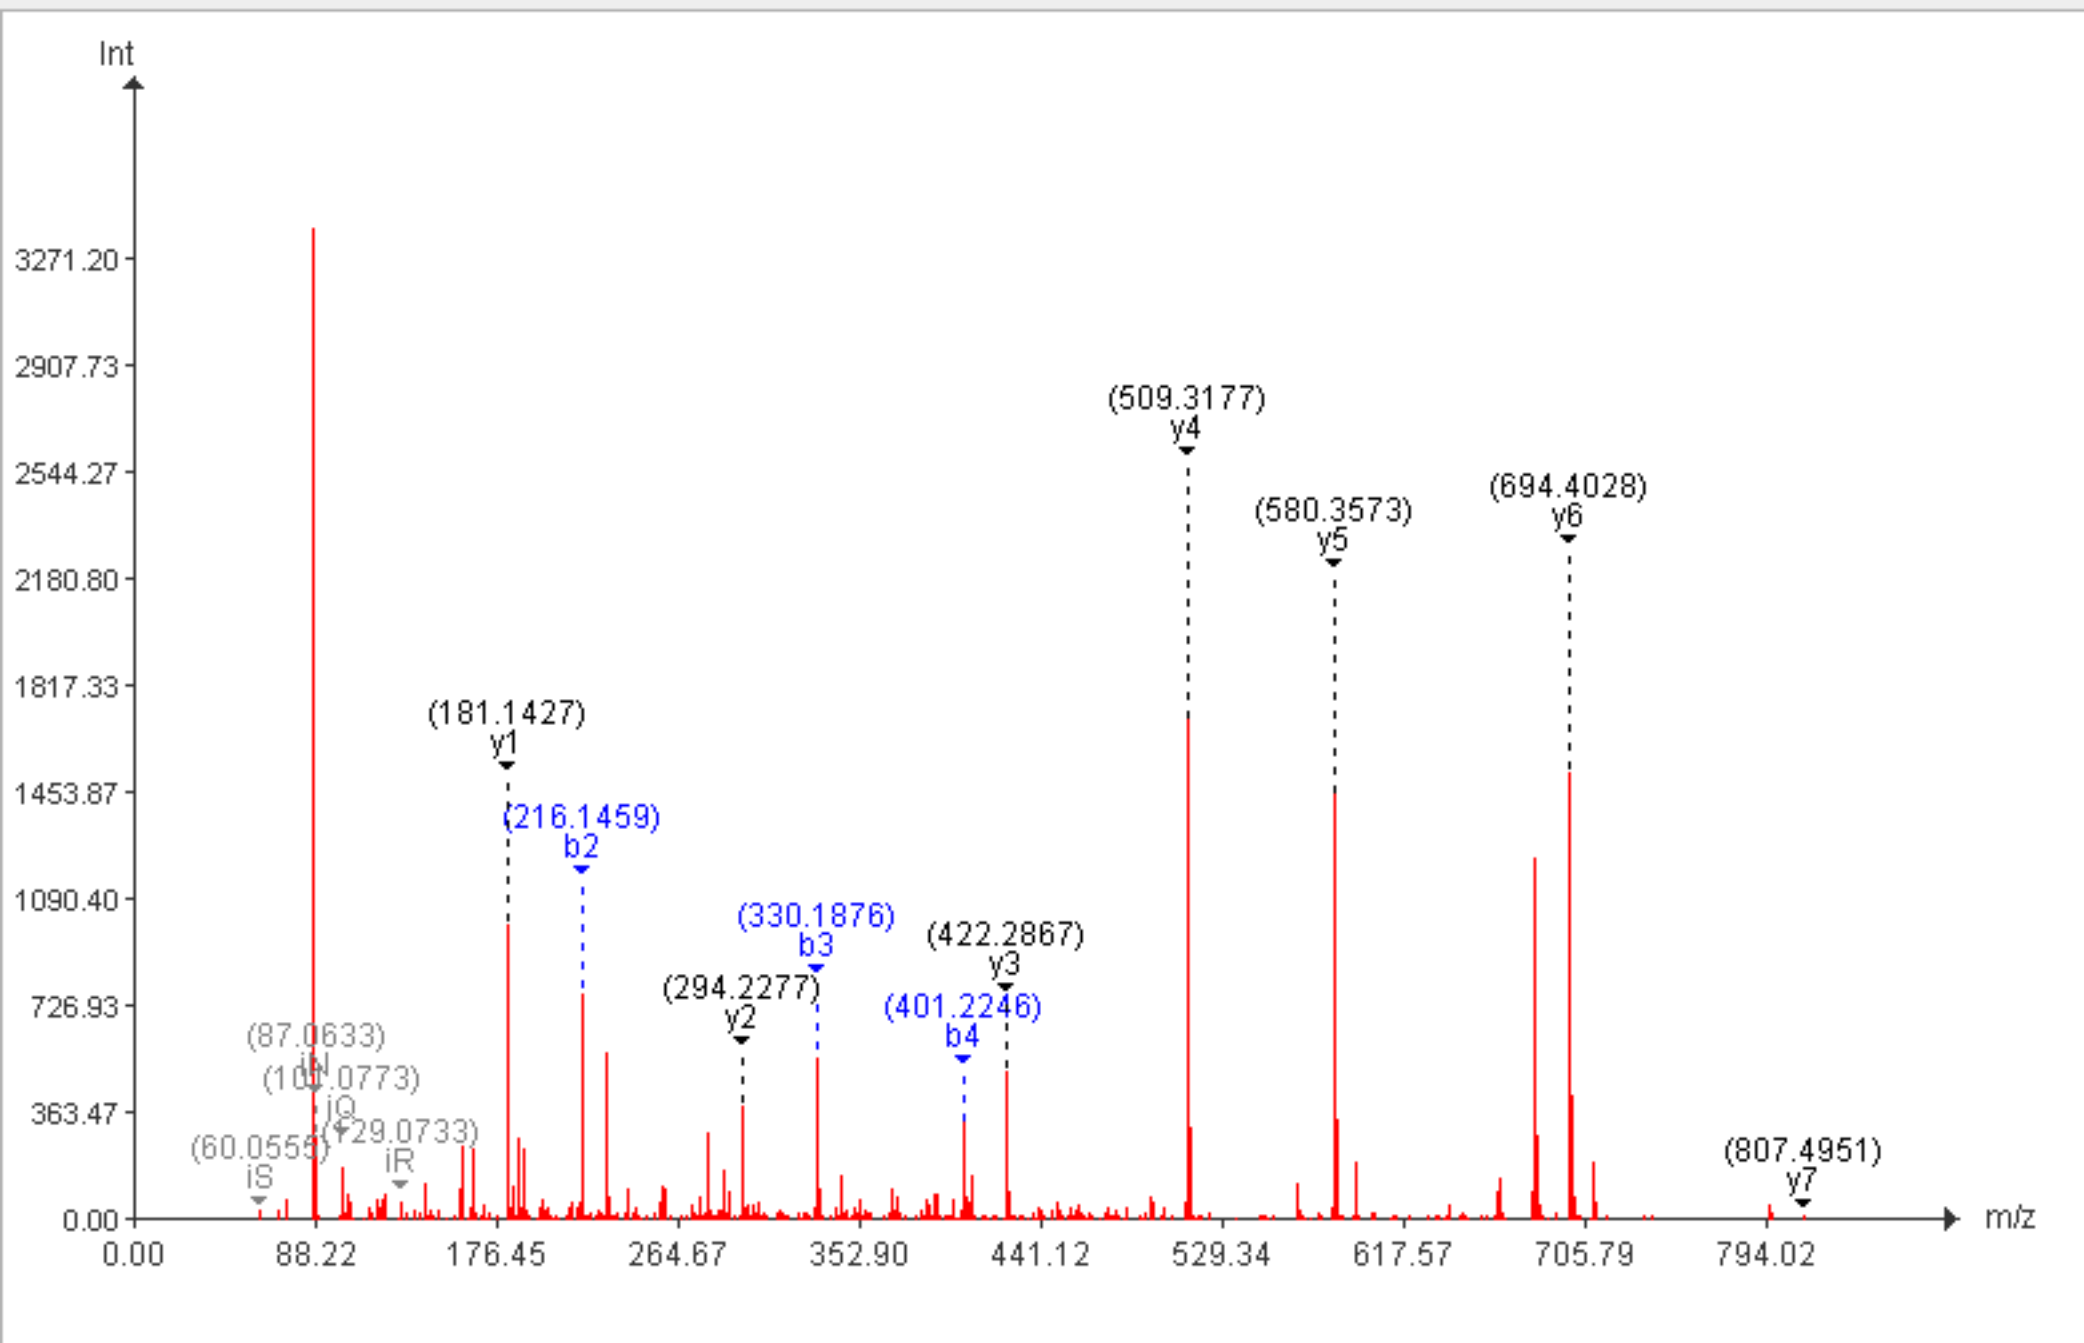

**AcD3-GQVITIGN(Dam)ER(C13\*)-COOH**  
**precursor mass: 569.8129 Da (charge: +2) protein: P62737 (247-256)**  
**score (threshold): 74.0 (31.0)**  
**instrument: Waters Q-TOF Premier**

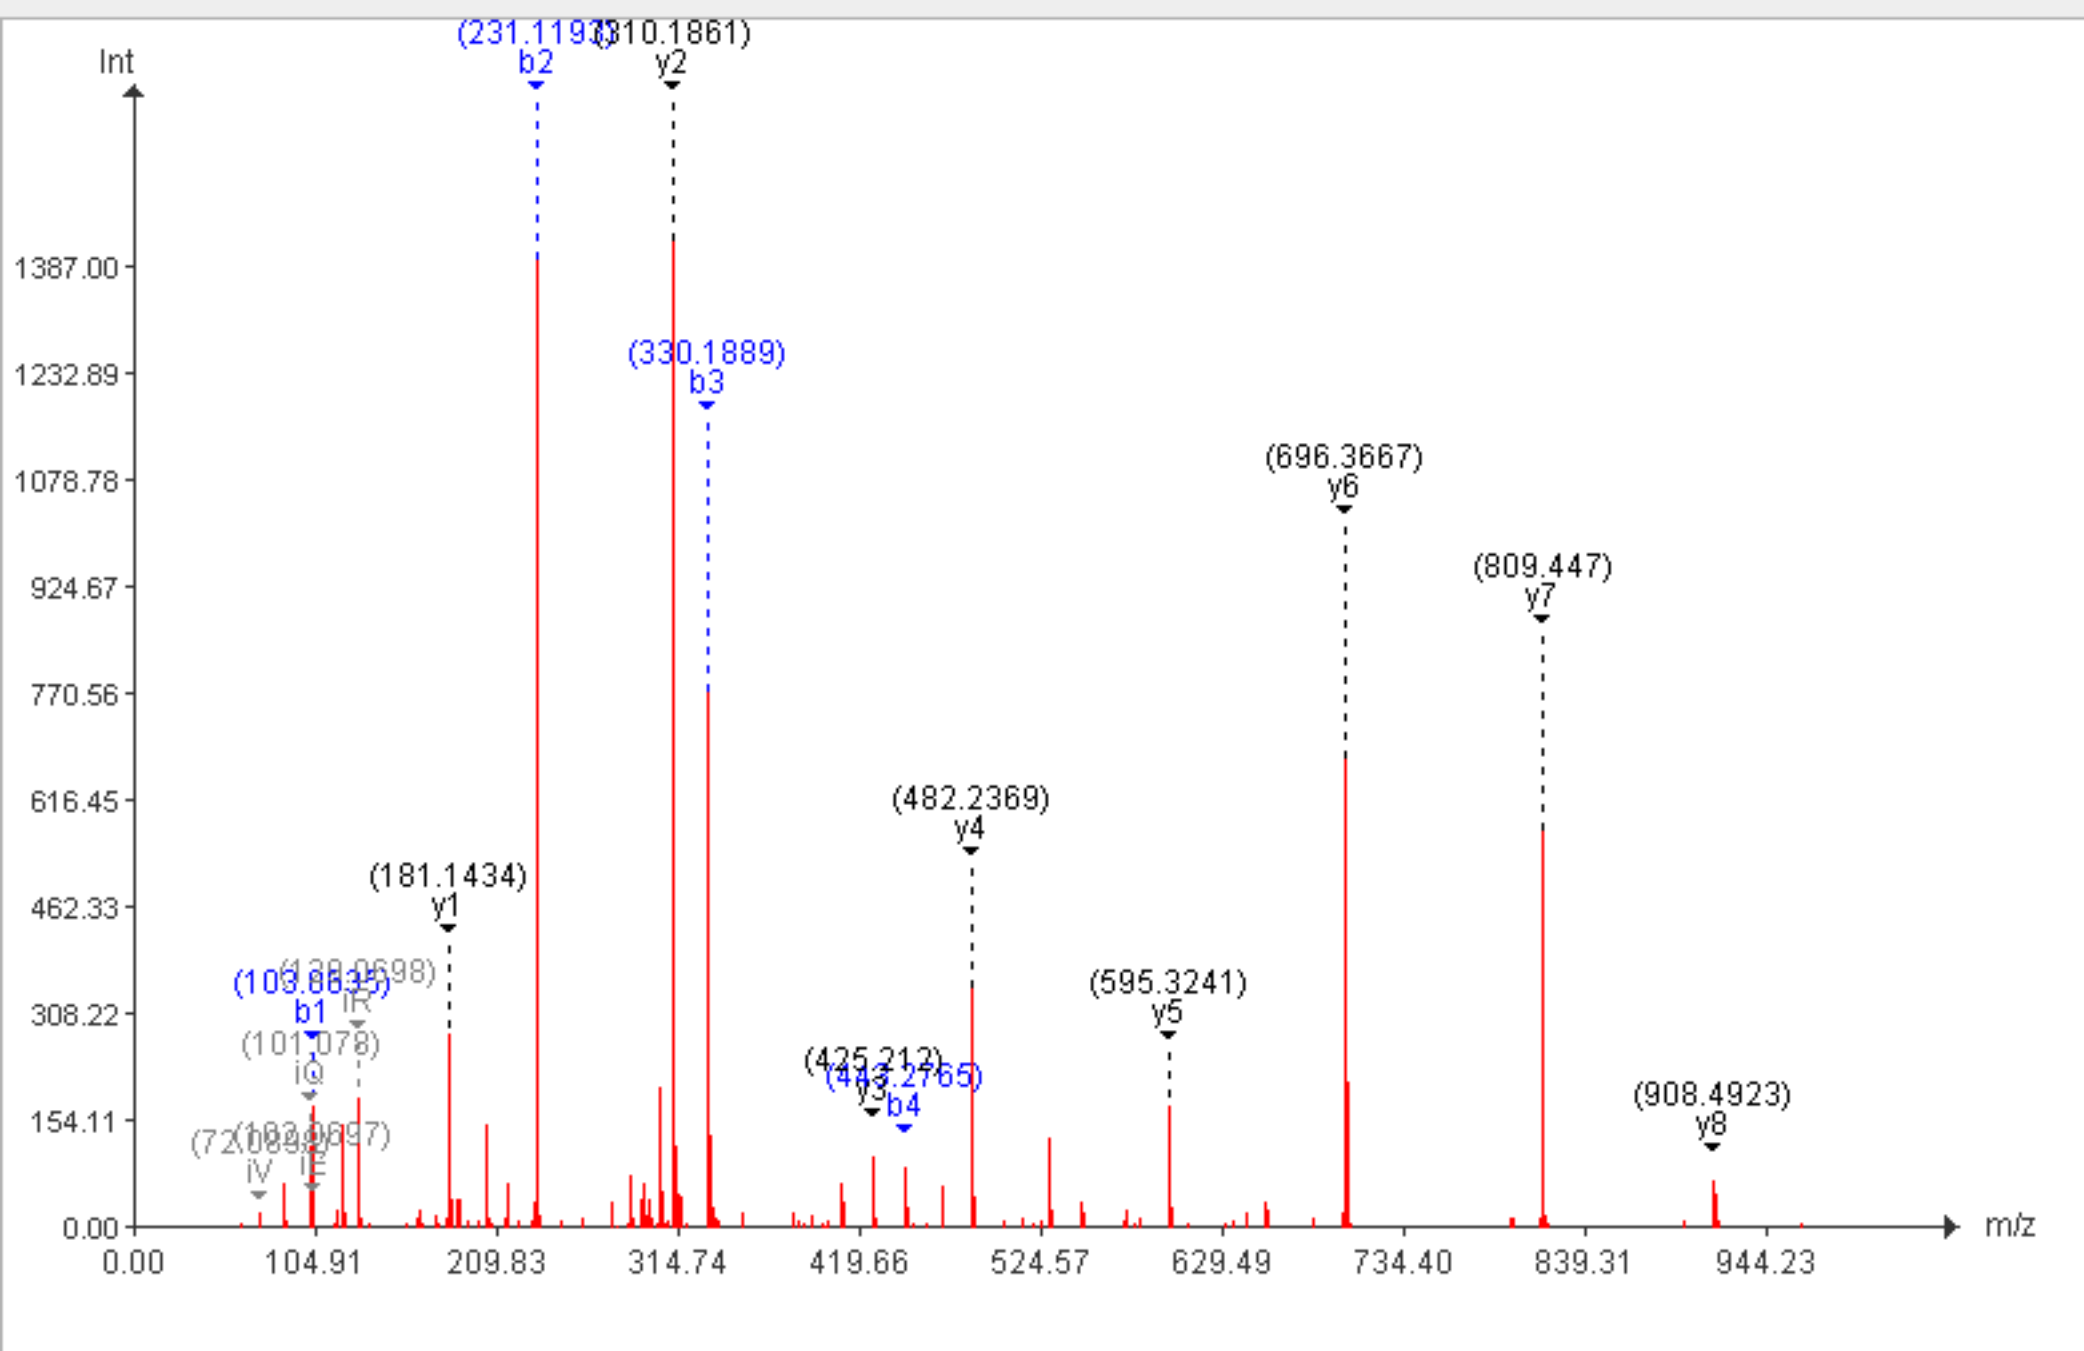



**AcD3-GPEQM(Mox\*)ELEEKG(AcD3K\*)AGSGLR-COOH**  
**precursor mass: 947.4578 Da (charge: +2) protein: P62196 (5-21)**  
**score (threshold): 77.0 (31.0)**  
**instrument: Waters Q-TOF Premier**

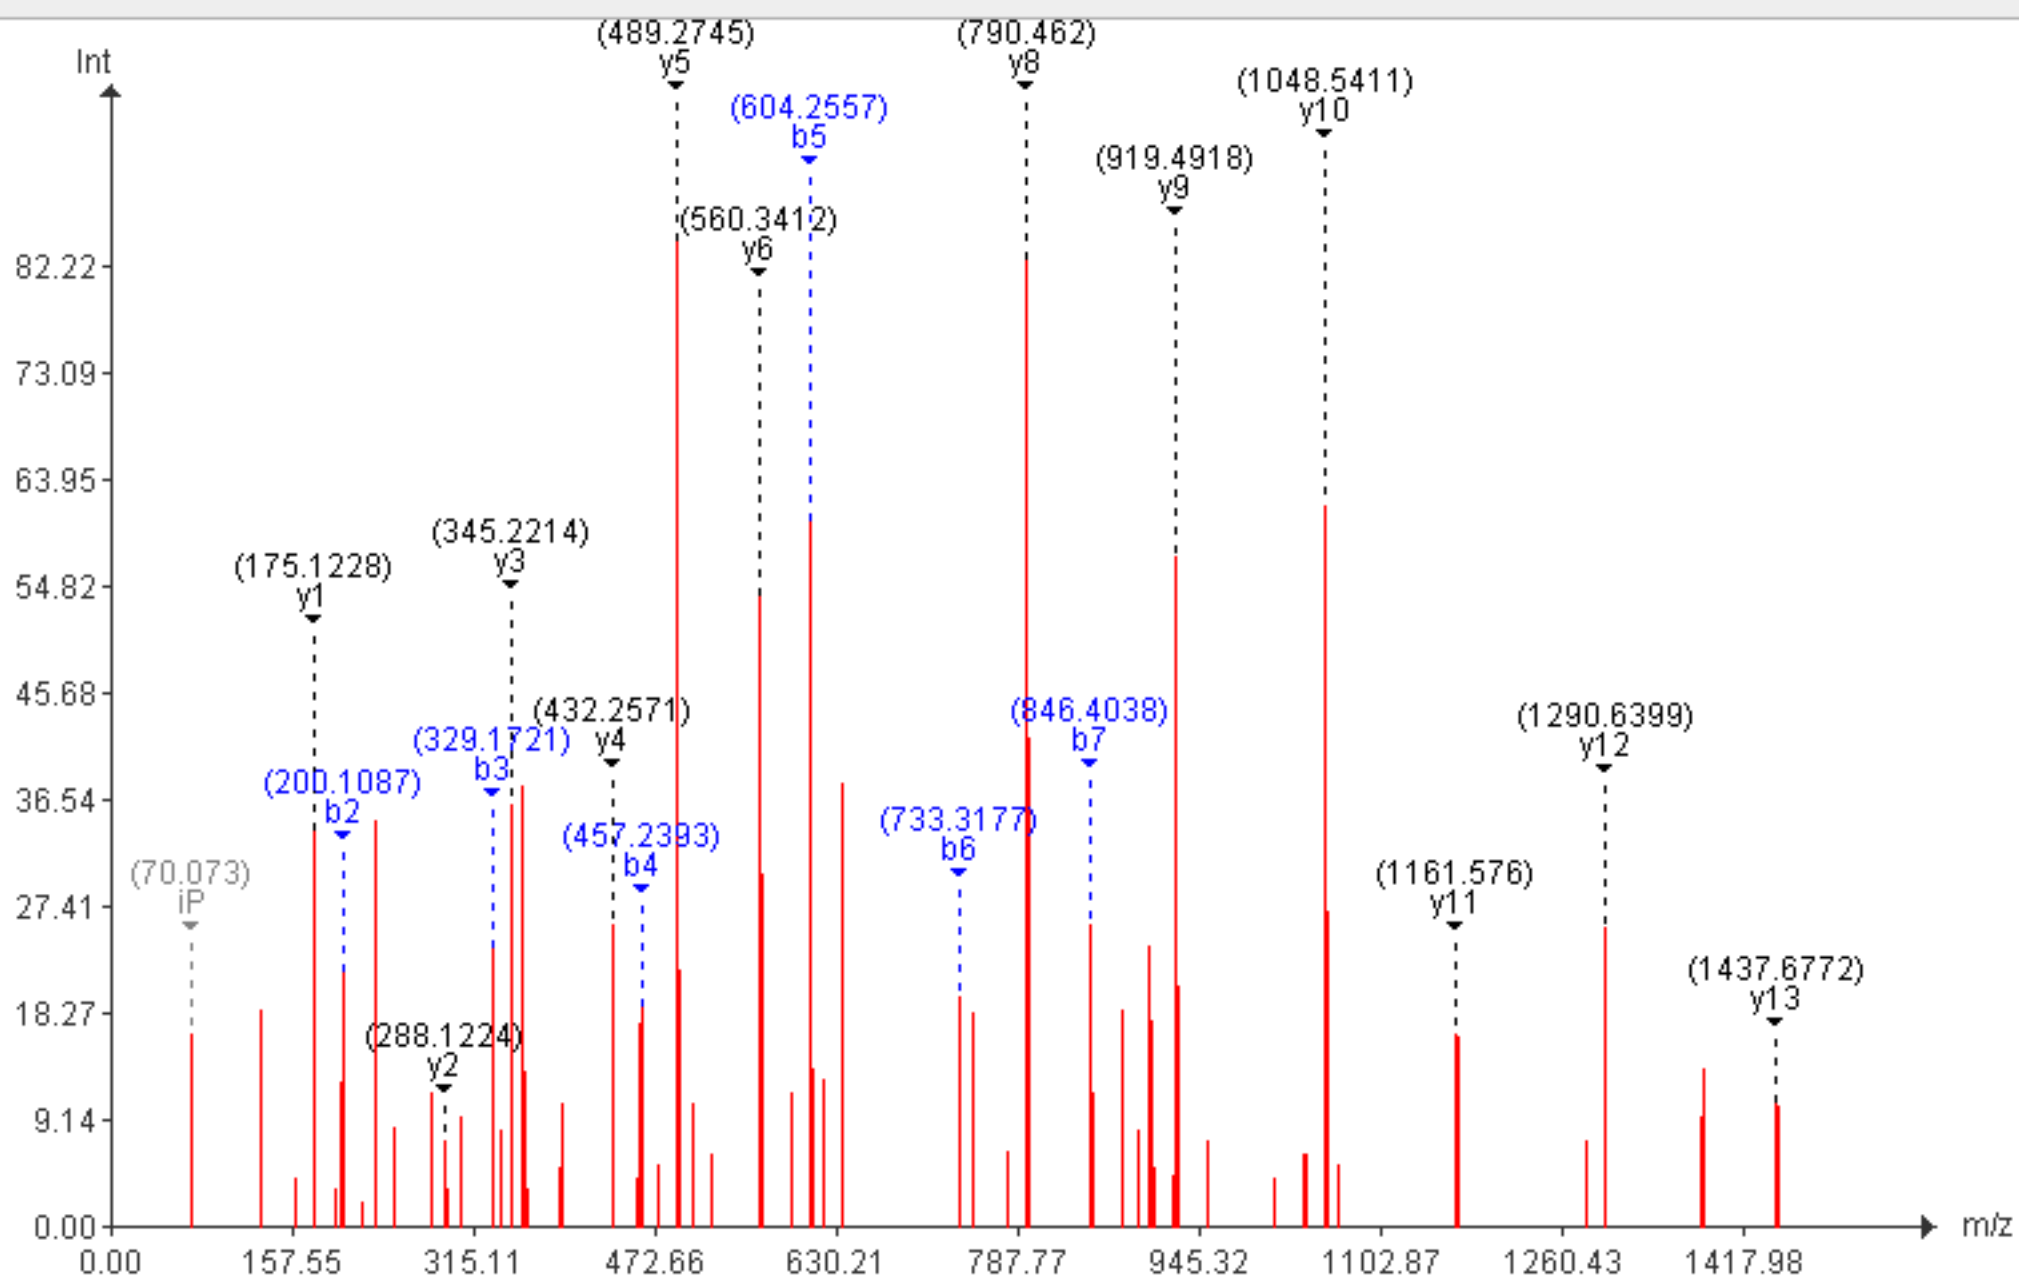

**AcD3-GVM(Mox\*)N(Dam)GEYYQESNGPTDSYAAISEVDR-COOH**  
**precursor mass: 972.0705 Da (charge: +3) protein: O08585 (76-101)**  
**score (threshold): 98.0 (26.0)**  
**instrument: Waters Q-TOF Premier**

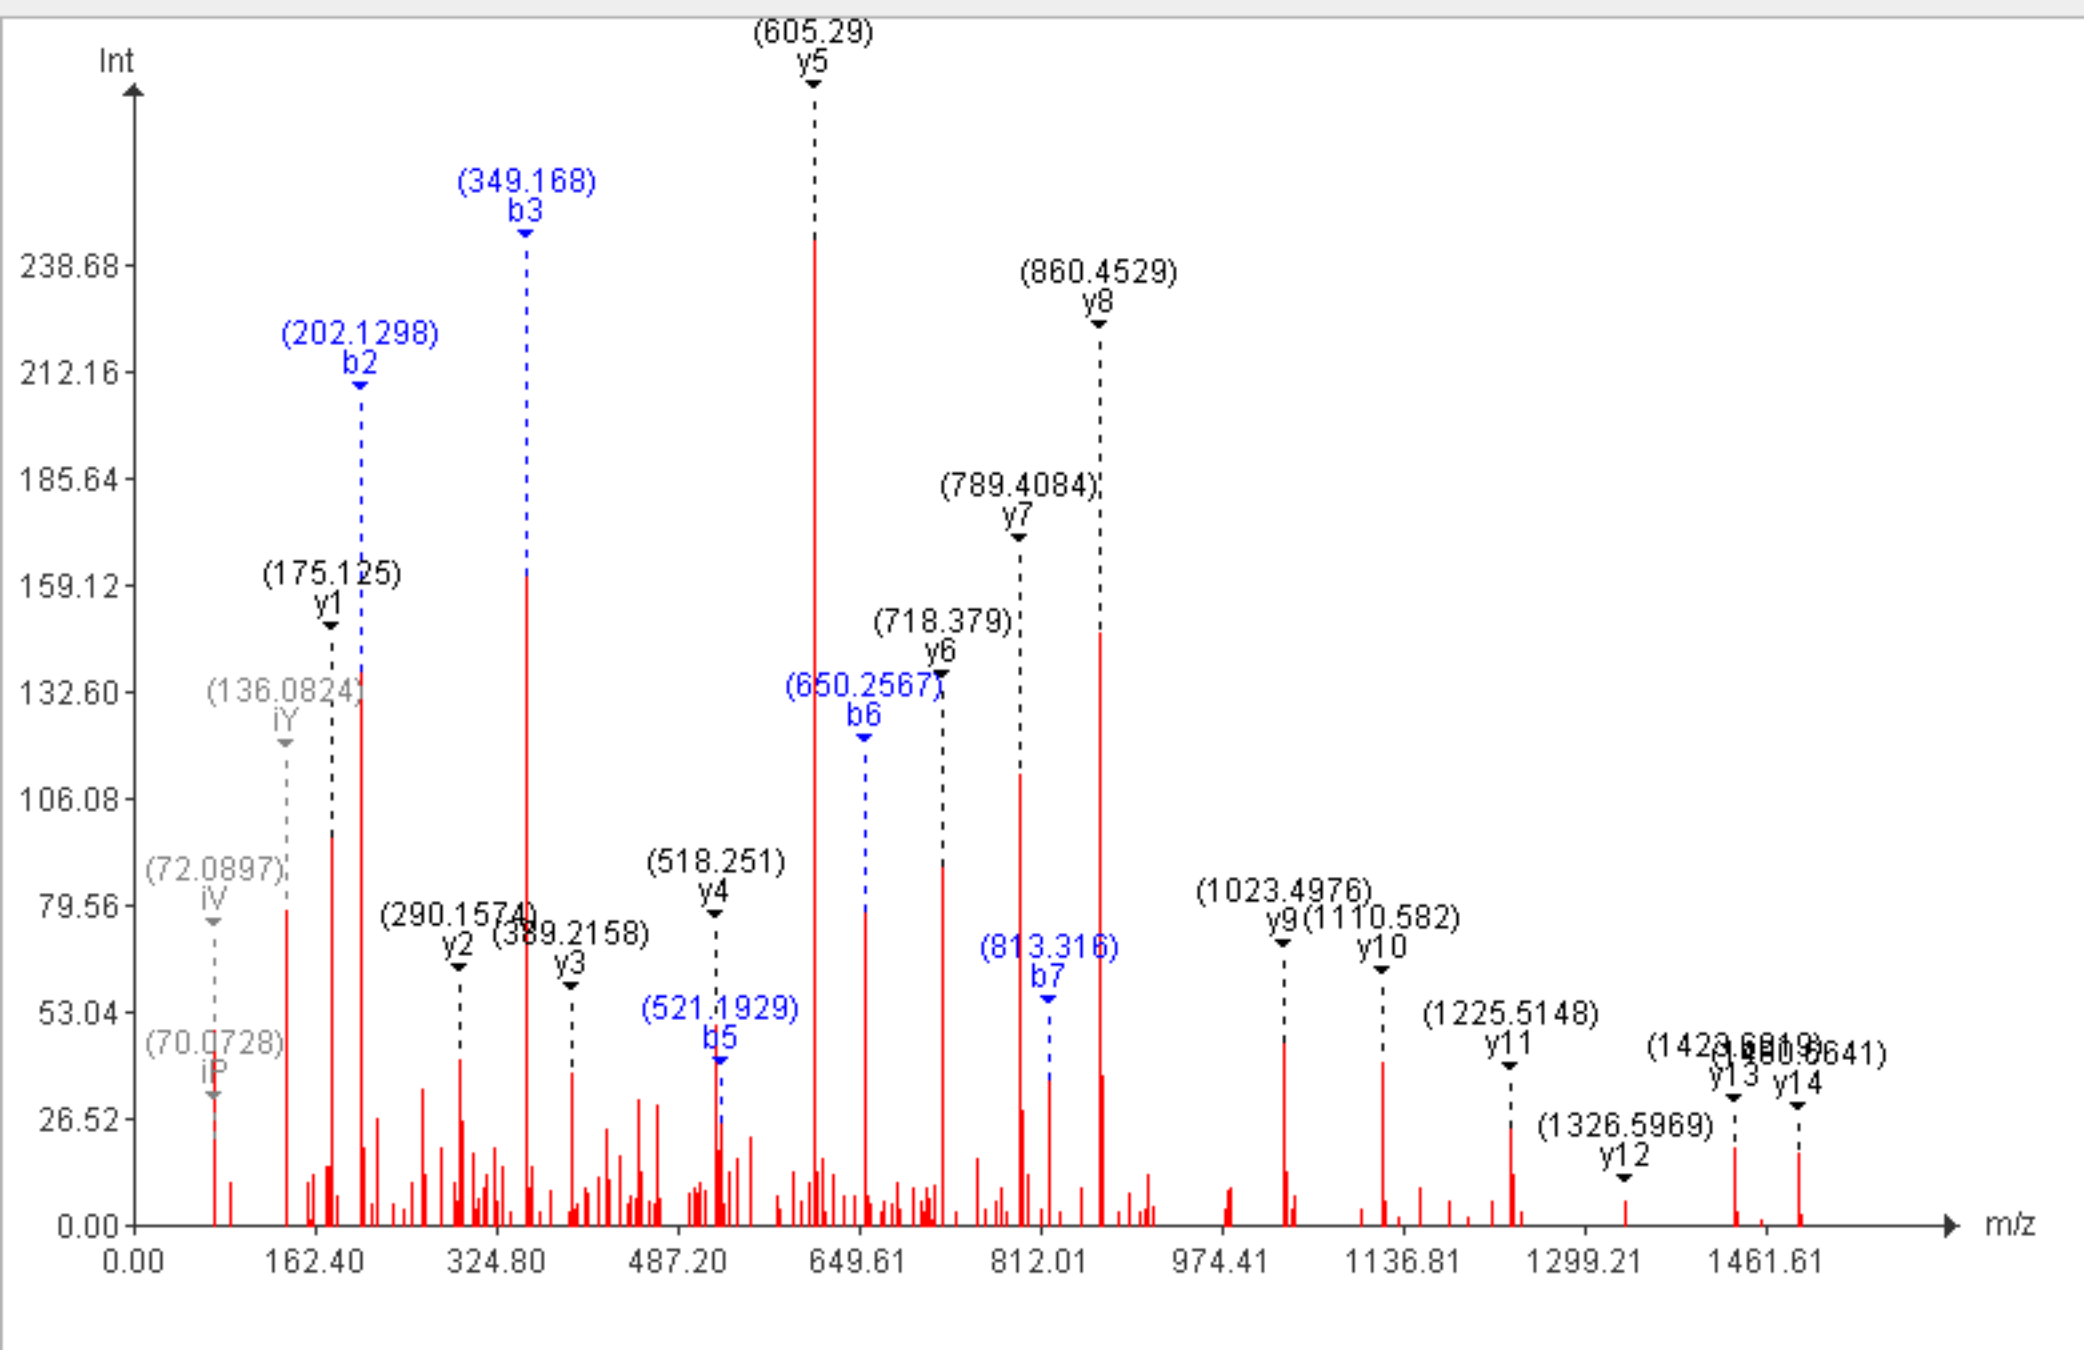

**AcD3-AM(Mox\*)VK(AcD3K\*)SVER(C13\*)-COOH**  
**precursor mass: 516.2888 Da (charge: +2) protein: Q9CR98 (15-22)**  
**score (threshold): 58.0 (32.0)**  
**instrument: Waters Q-TOF Premier**

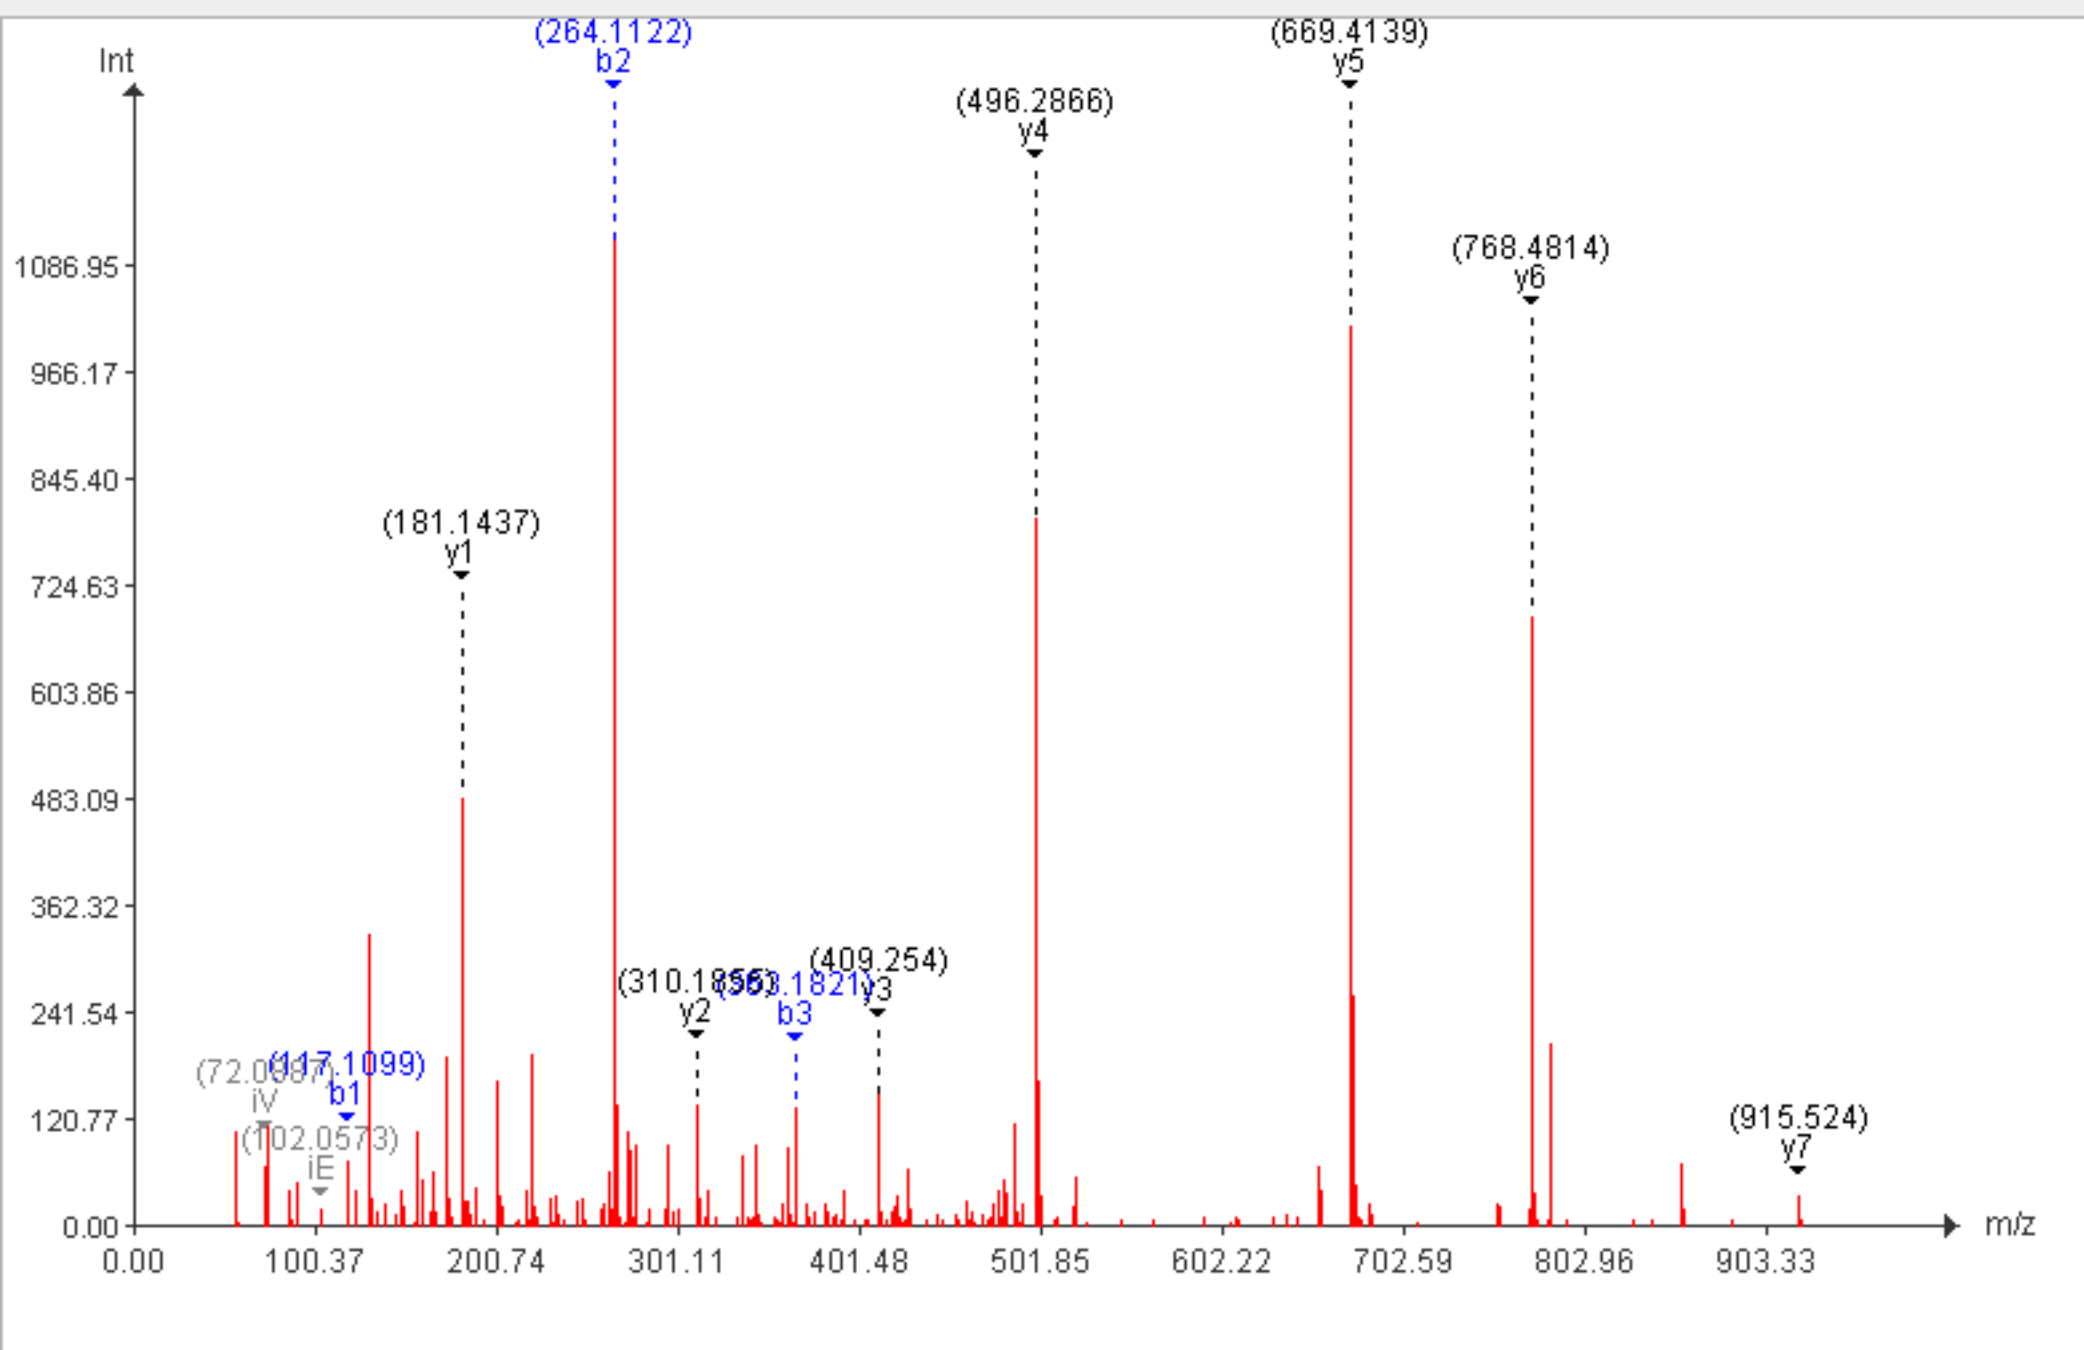

**AcD3-GTVEEDLGK(AcD3K\*)SR(C13\*)-COOH**  
precursor mass: 643.8311 Da (charge: +2) protein: P08113 (29-39)  
score (threshold): 62.0 (30.0)  
instrument: Waters Q-TOF Premier

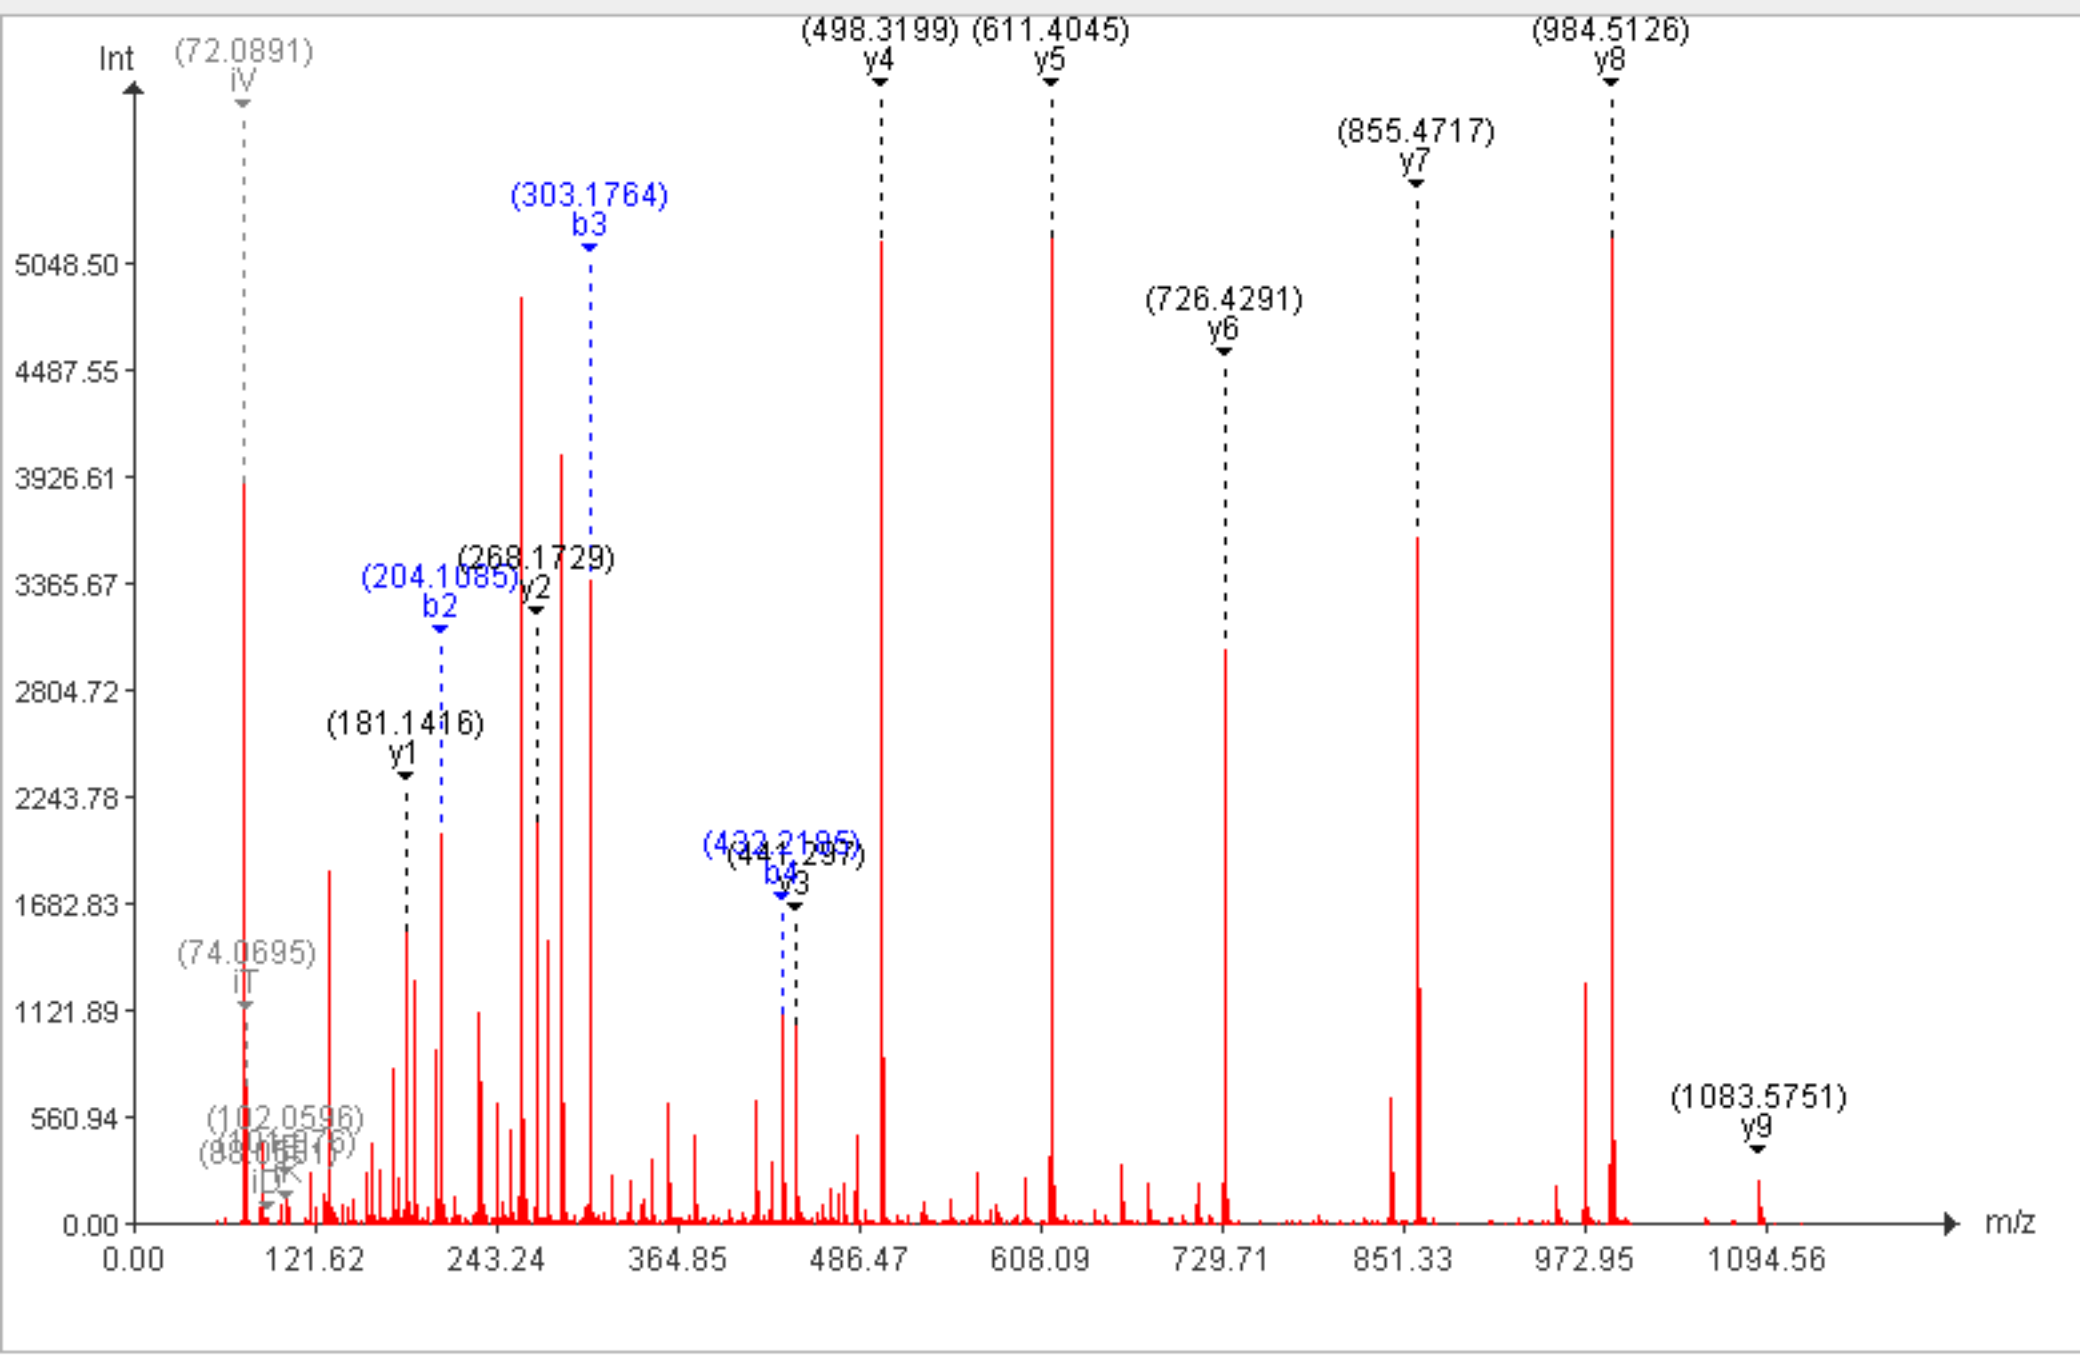

**AcD3-N(Dam)GSGM(Mox\*)C(Cmm\*)K(AcD3K\*)AGFAGDDAPR(C13\*)-COOH**

**precursor mass: 912.3651 Da (charge: +2) protein: P60710 (12-28)**

**score (threshold): 91.0 (25.0)**

**instrument: Waters Q-TOF Premier**

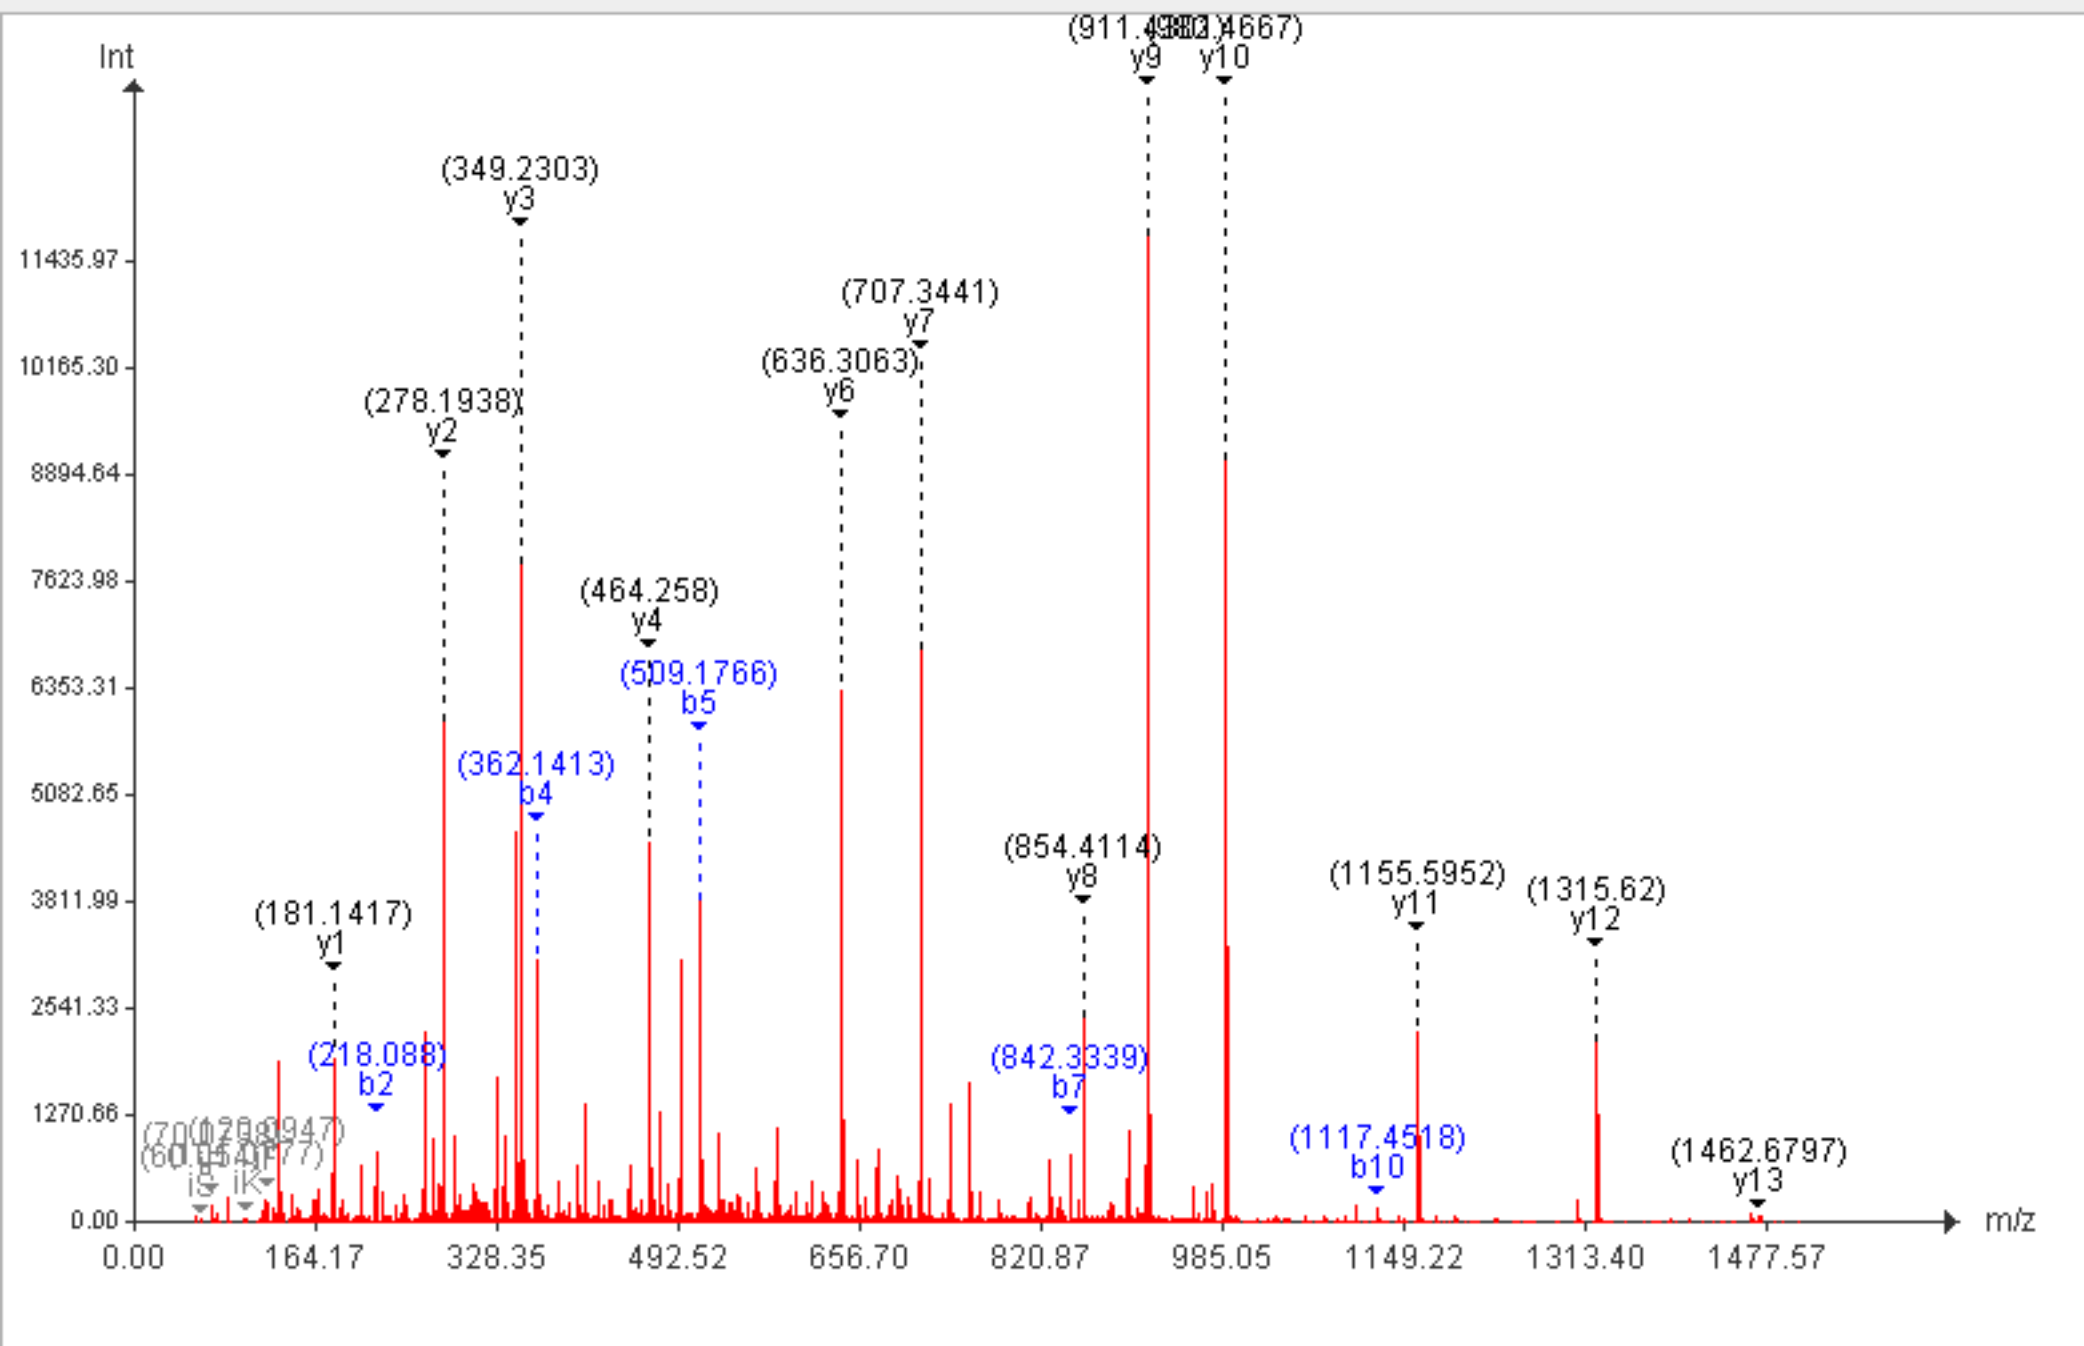

*AcD3-GK(AcD3K\*)PSASPQER-COOH*

precursor mass: 573.8047 Da (charge: +2) protein: Q8BTI8 (1503-1512)

score (threshold): 40.0 (31.0)

instrument: Waters Q-TOF Premier

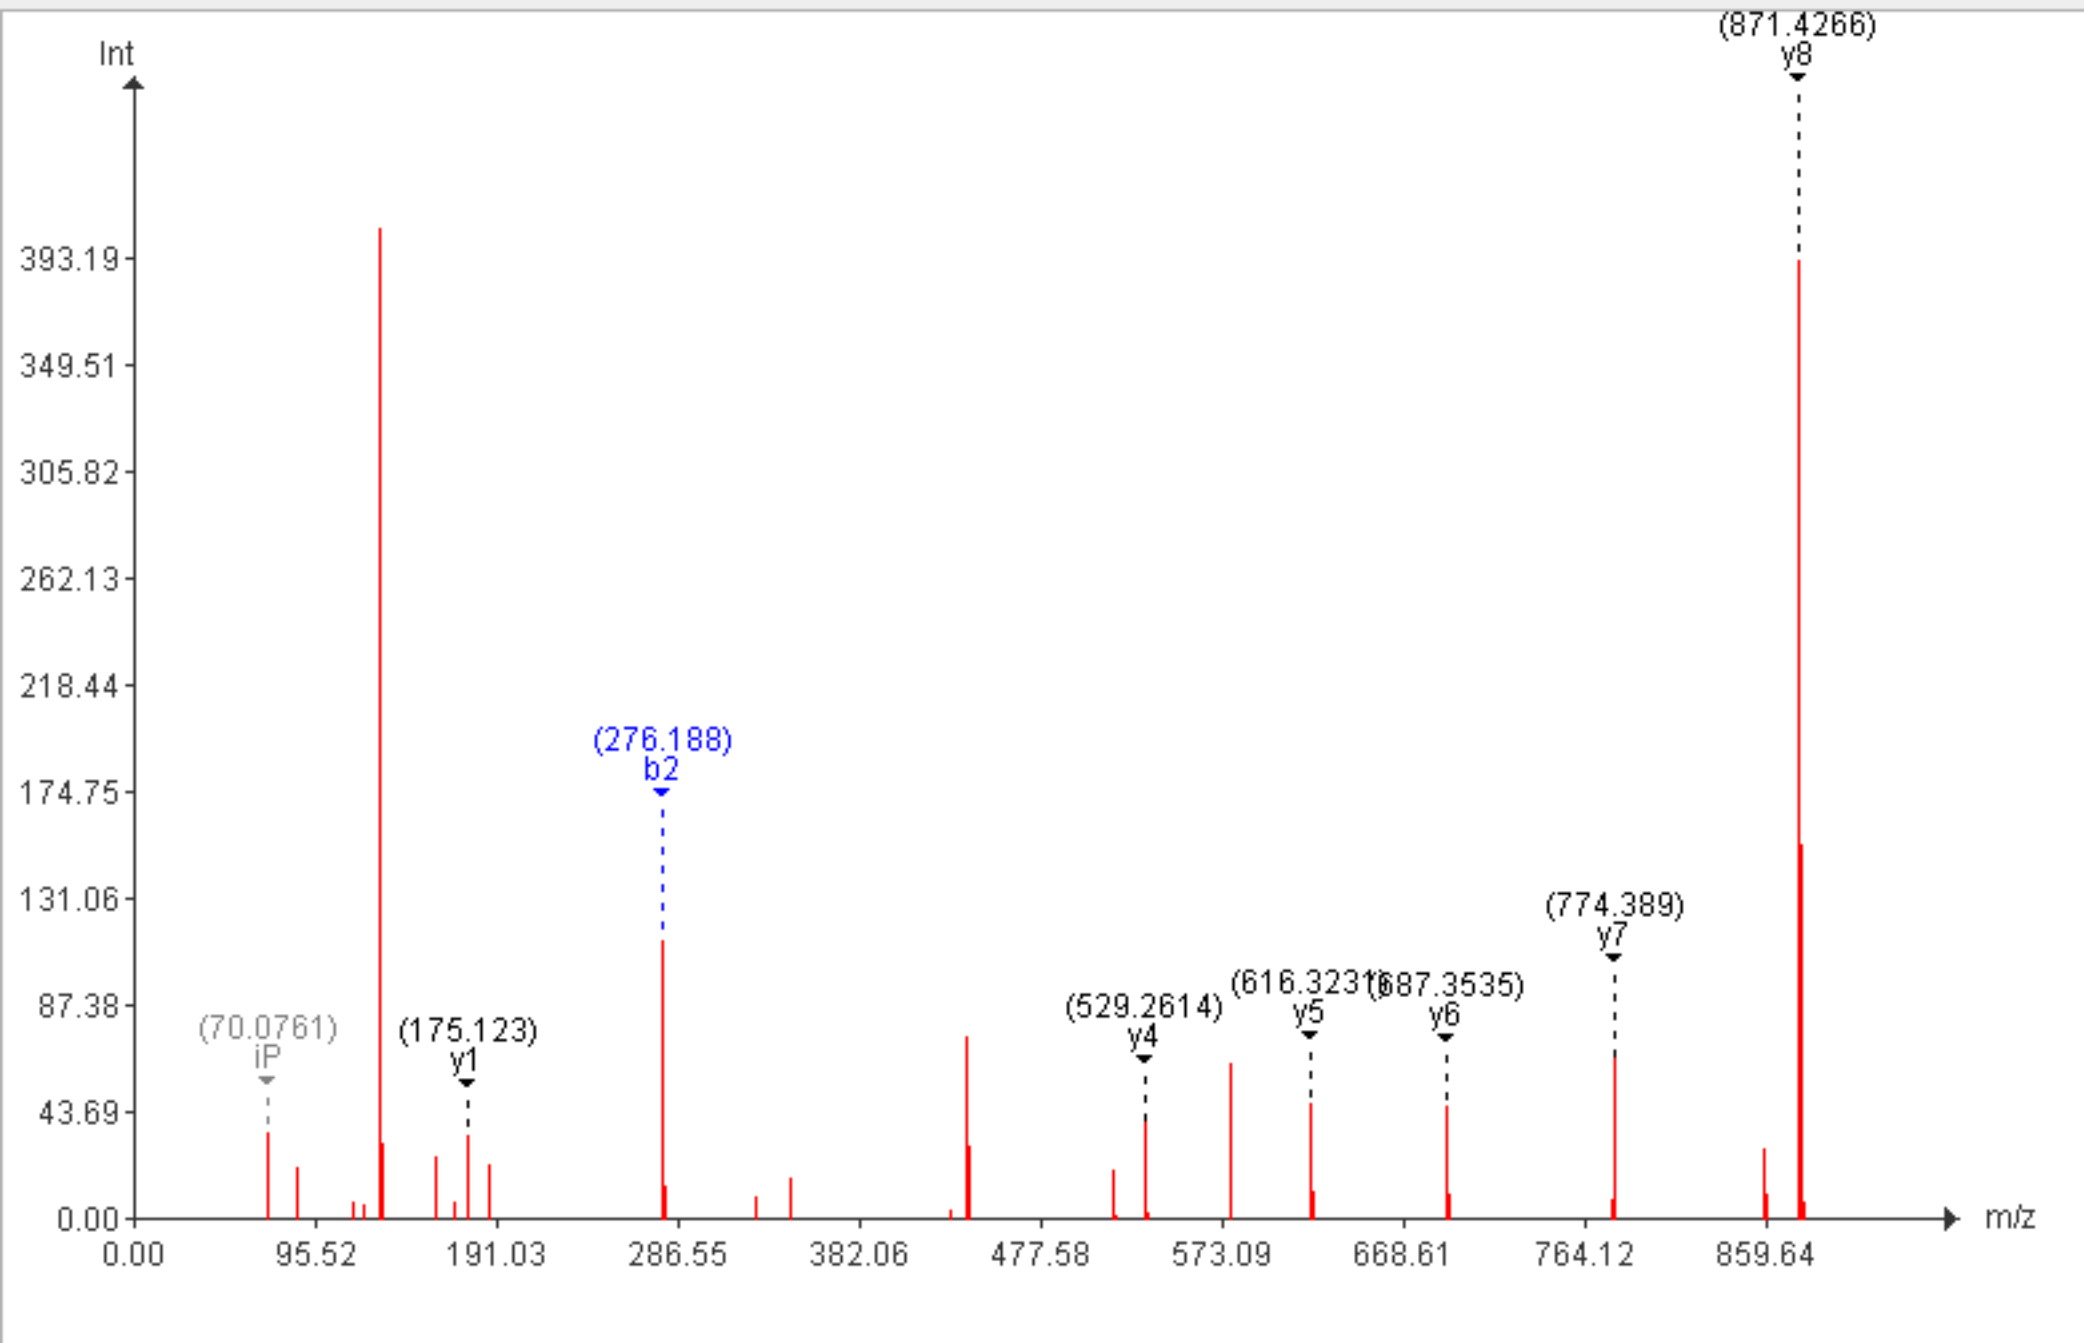

**AcD3-SSPDSK(AcD3K\*)PK(AcD3K\*)TR-COOH**  
**precursor mass: 619.3387 Da (charge: +2) protein: Q8BT18 (1517-1526)**  
**score (threshold): 32.0 (31.0)**  
**instrument: Waters Q-TOF Premier**

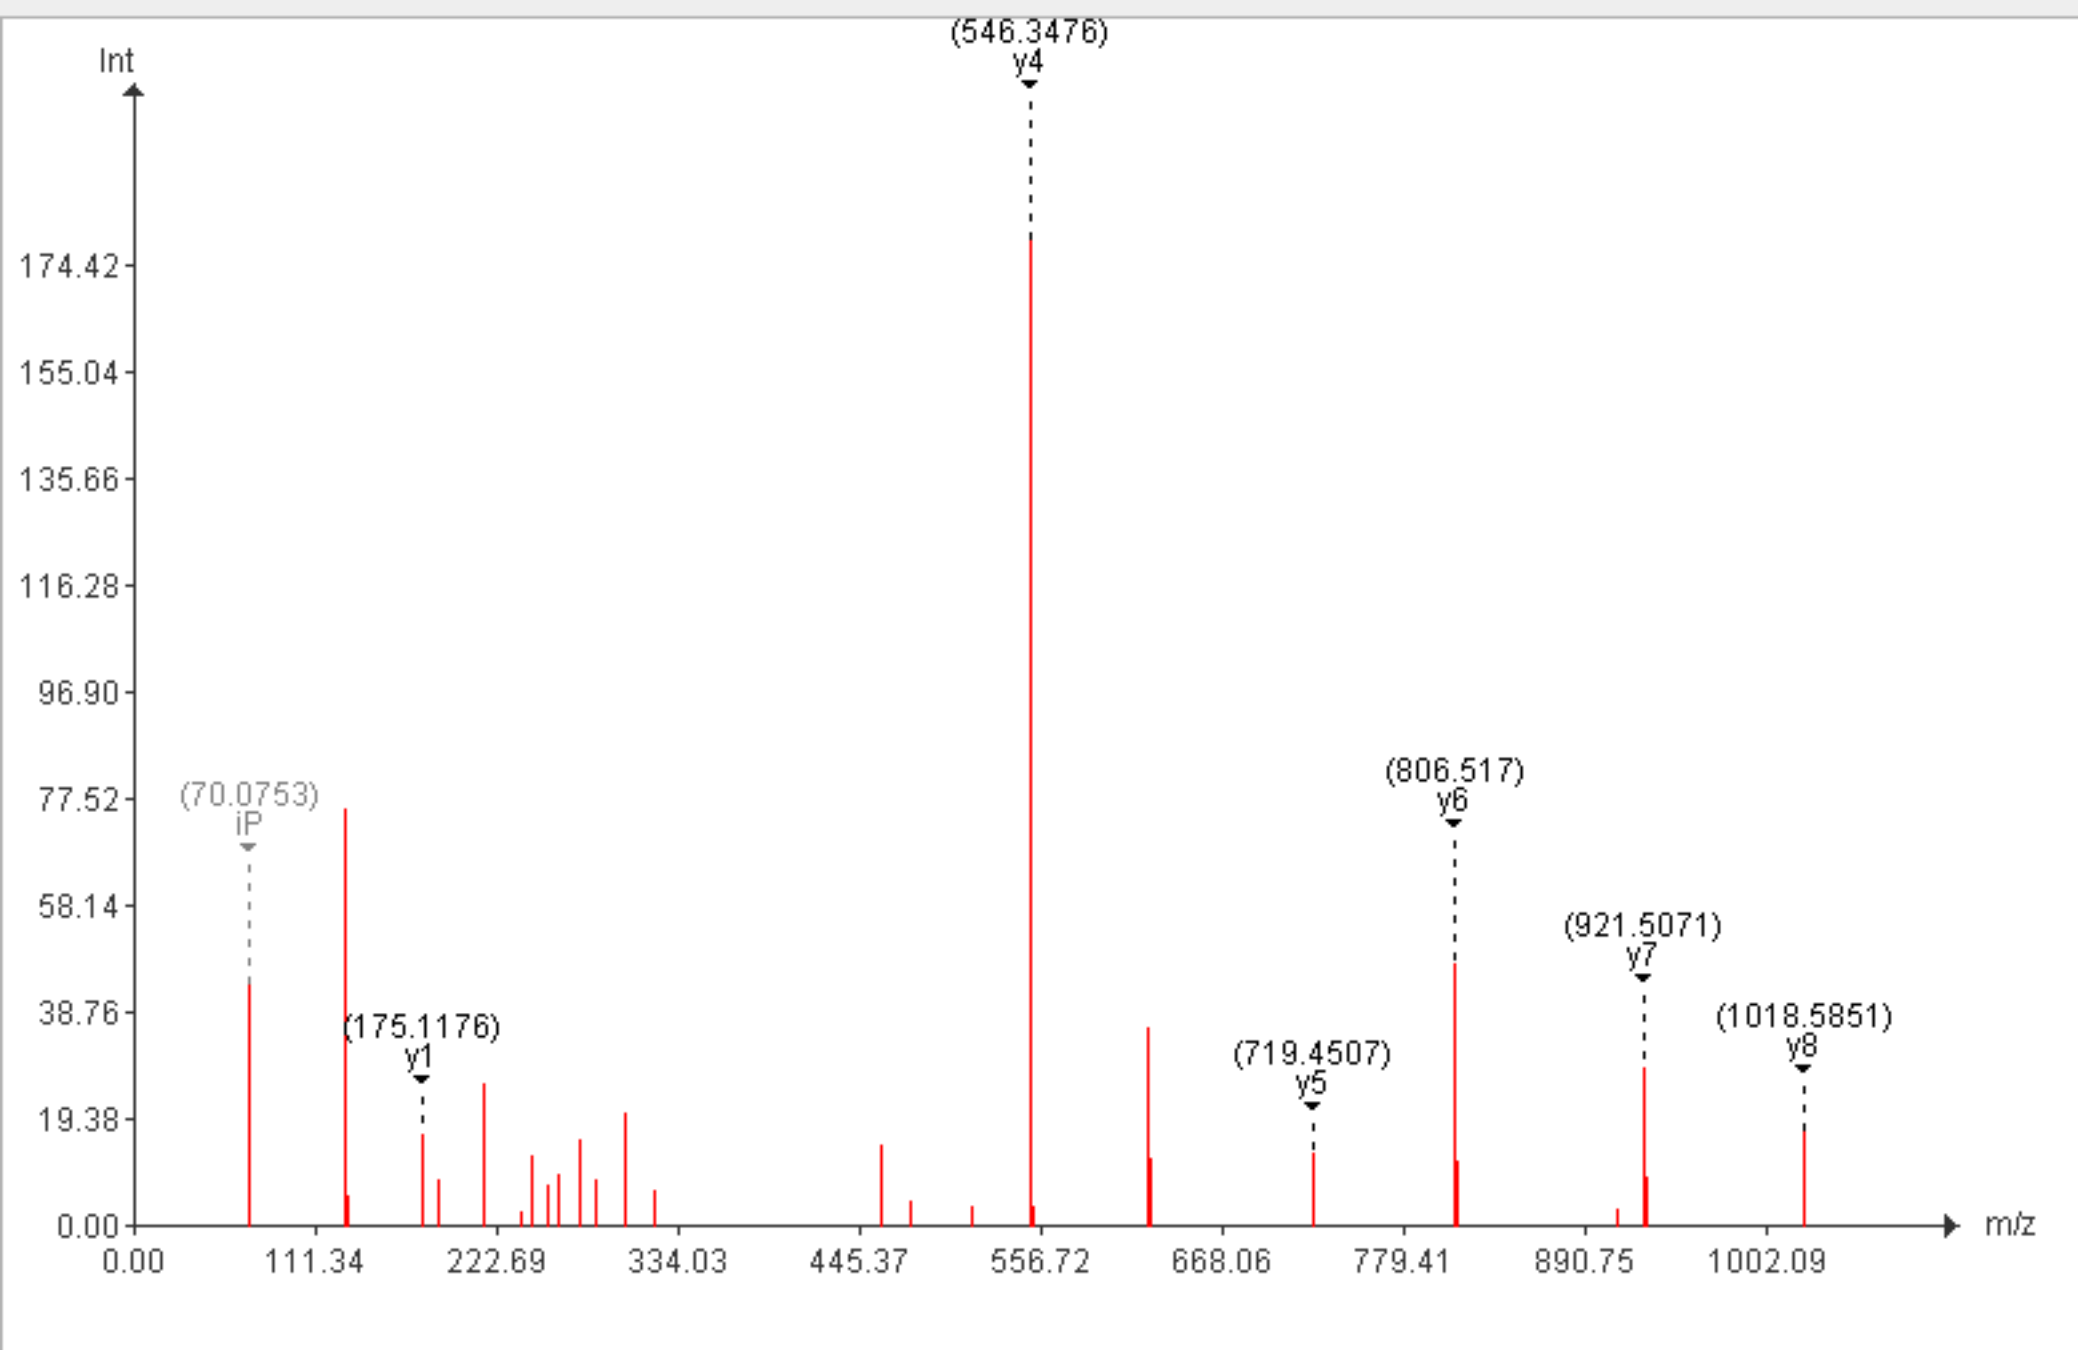

**AcD3-GGDGQAGPDEGEVDSC(Cmm\*)LR(C13\*)-COOH**  
precursor mass: 935.4052 Da (charge: +2) protein: Q9CPW4 (30-47)  
score (threshold): 97.0 (27.0)  
instrument: Waters Q-TOF Premier

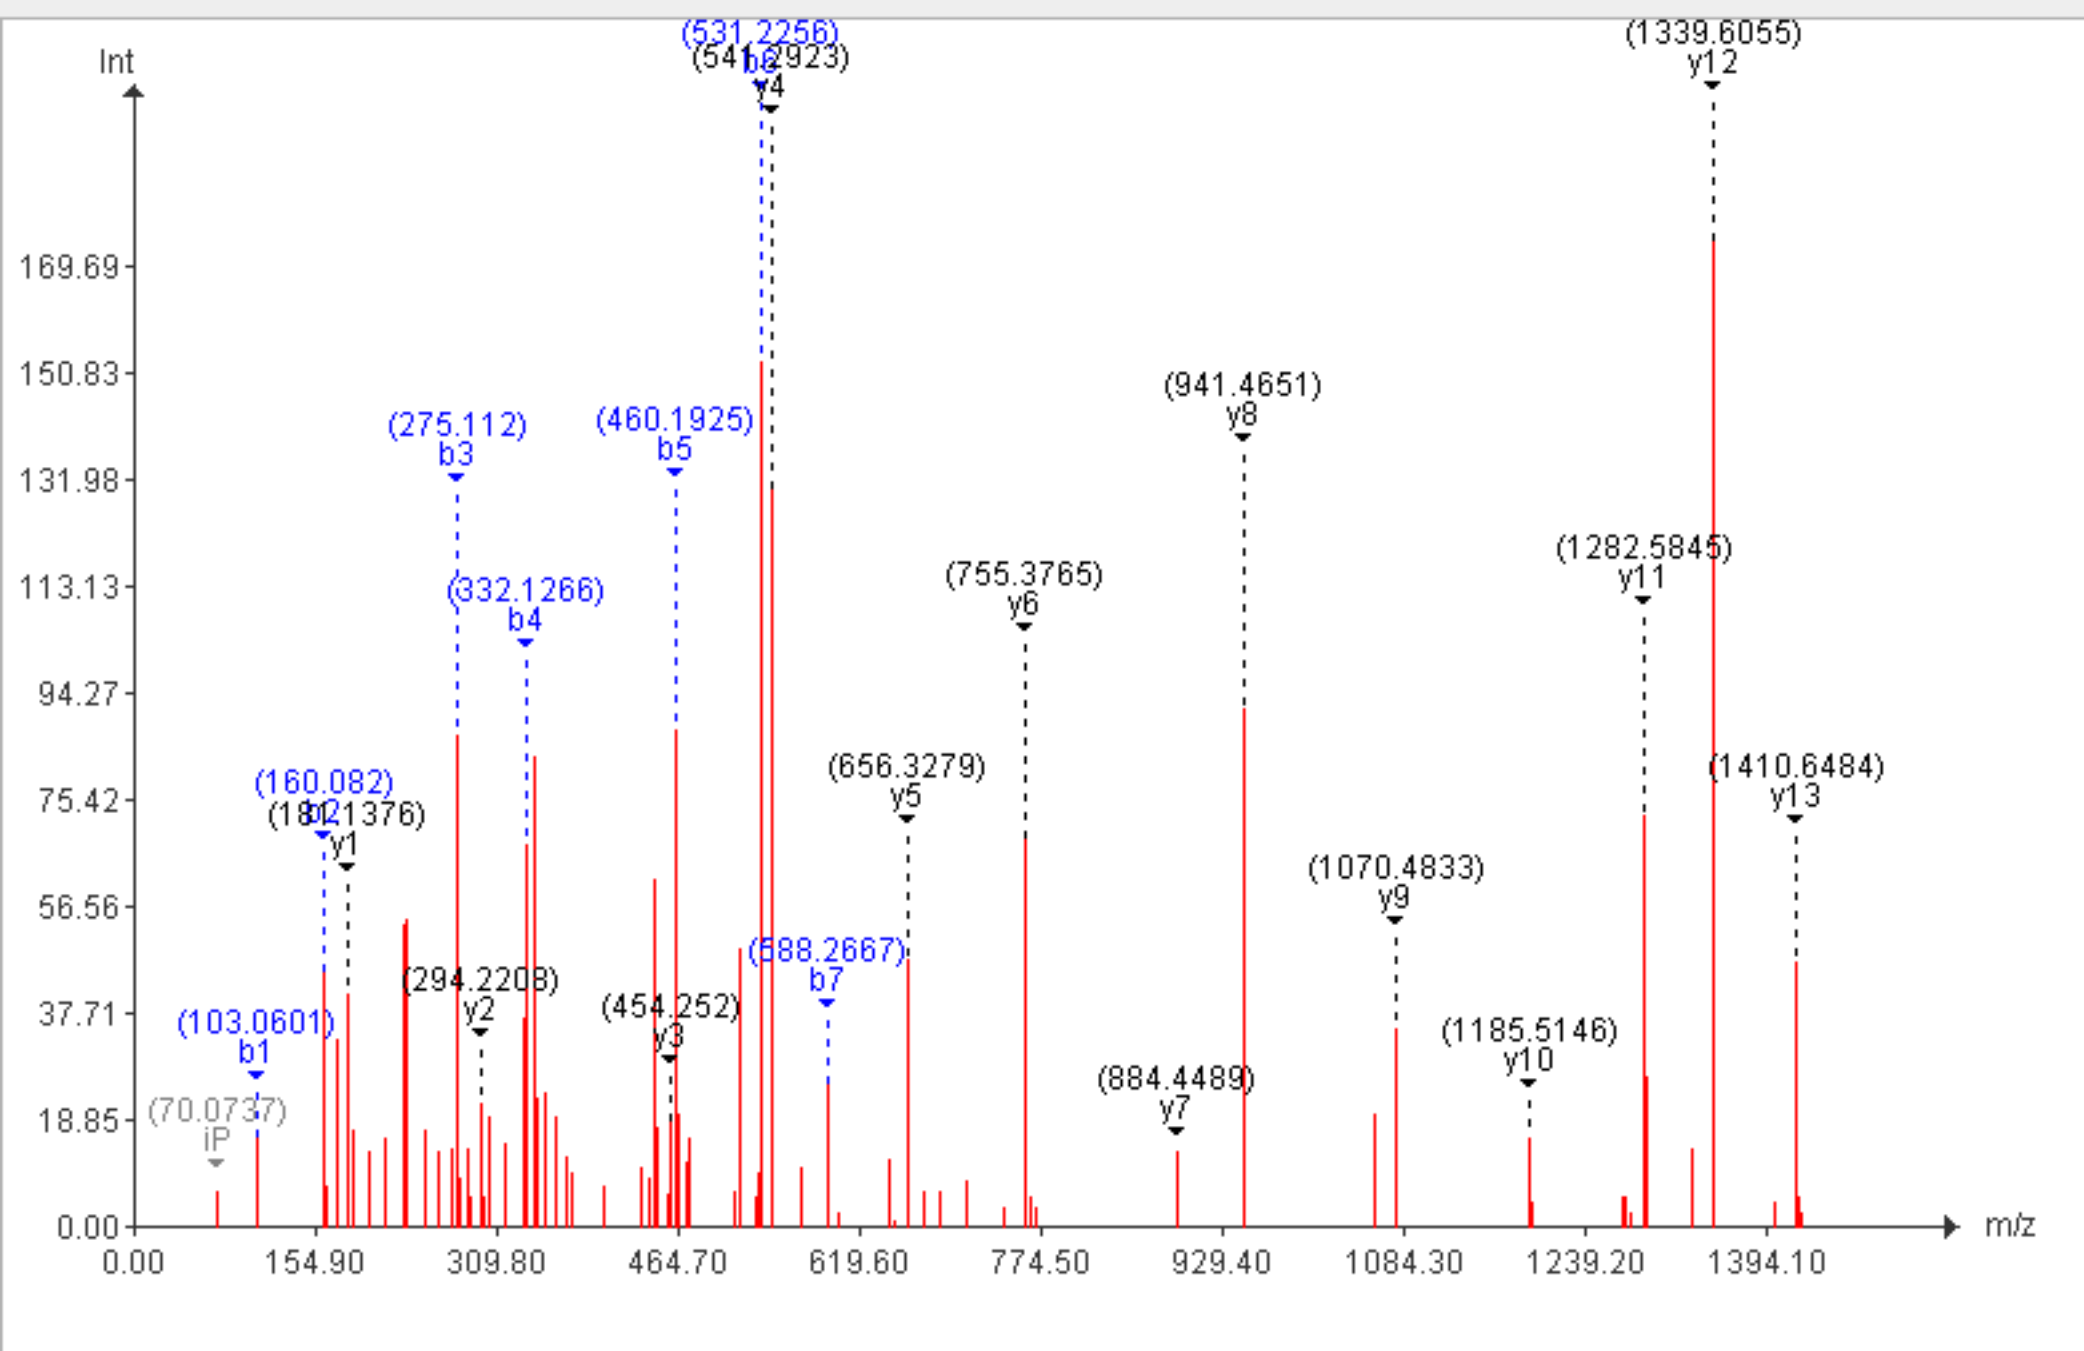



**AcD3-STAAQQLR-COOH**

**precursor mass: 524.7723 Da (charge: +2) protein: Q8VDD5 (1154-1162)**

**score (threshold): 65.0 (31.0)**

**instrument: Waters Q-TOF Premier**

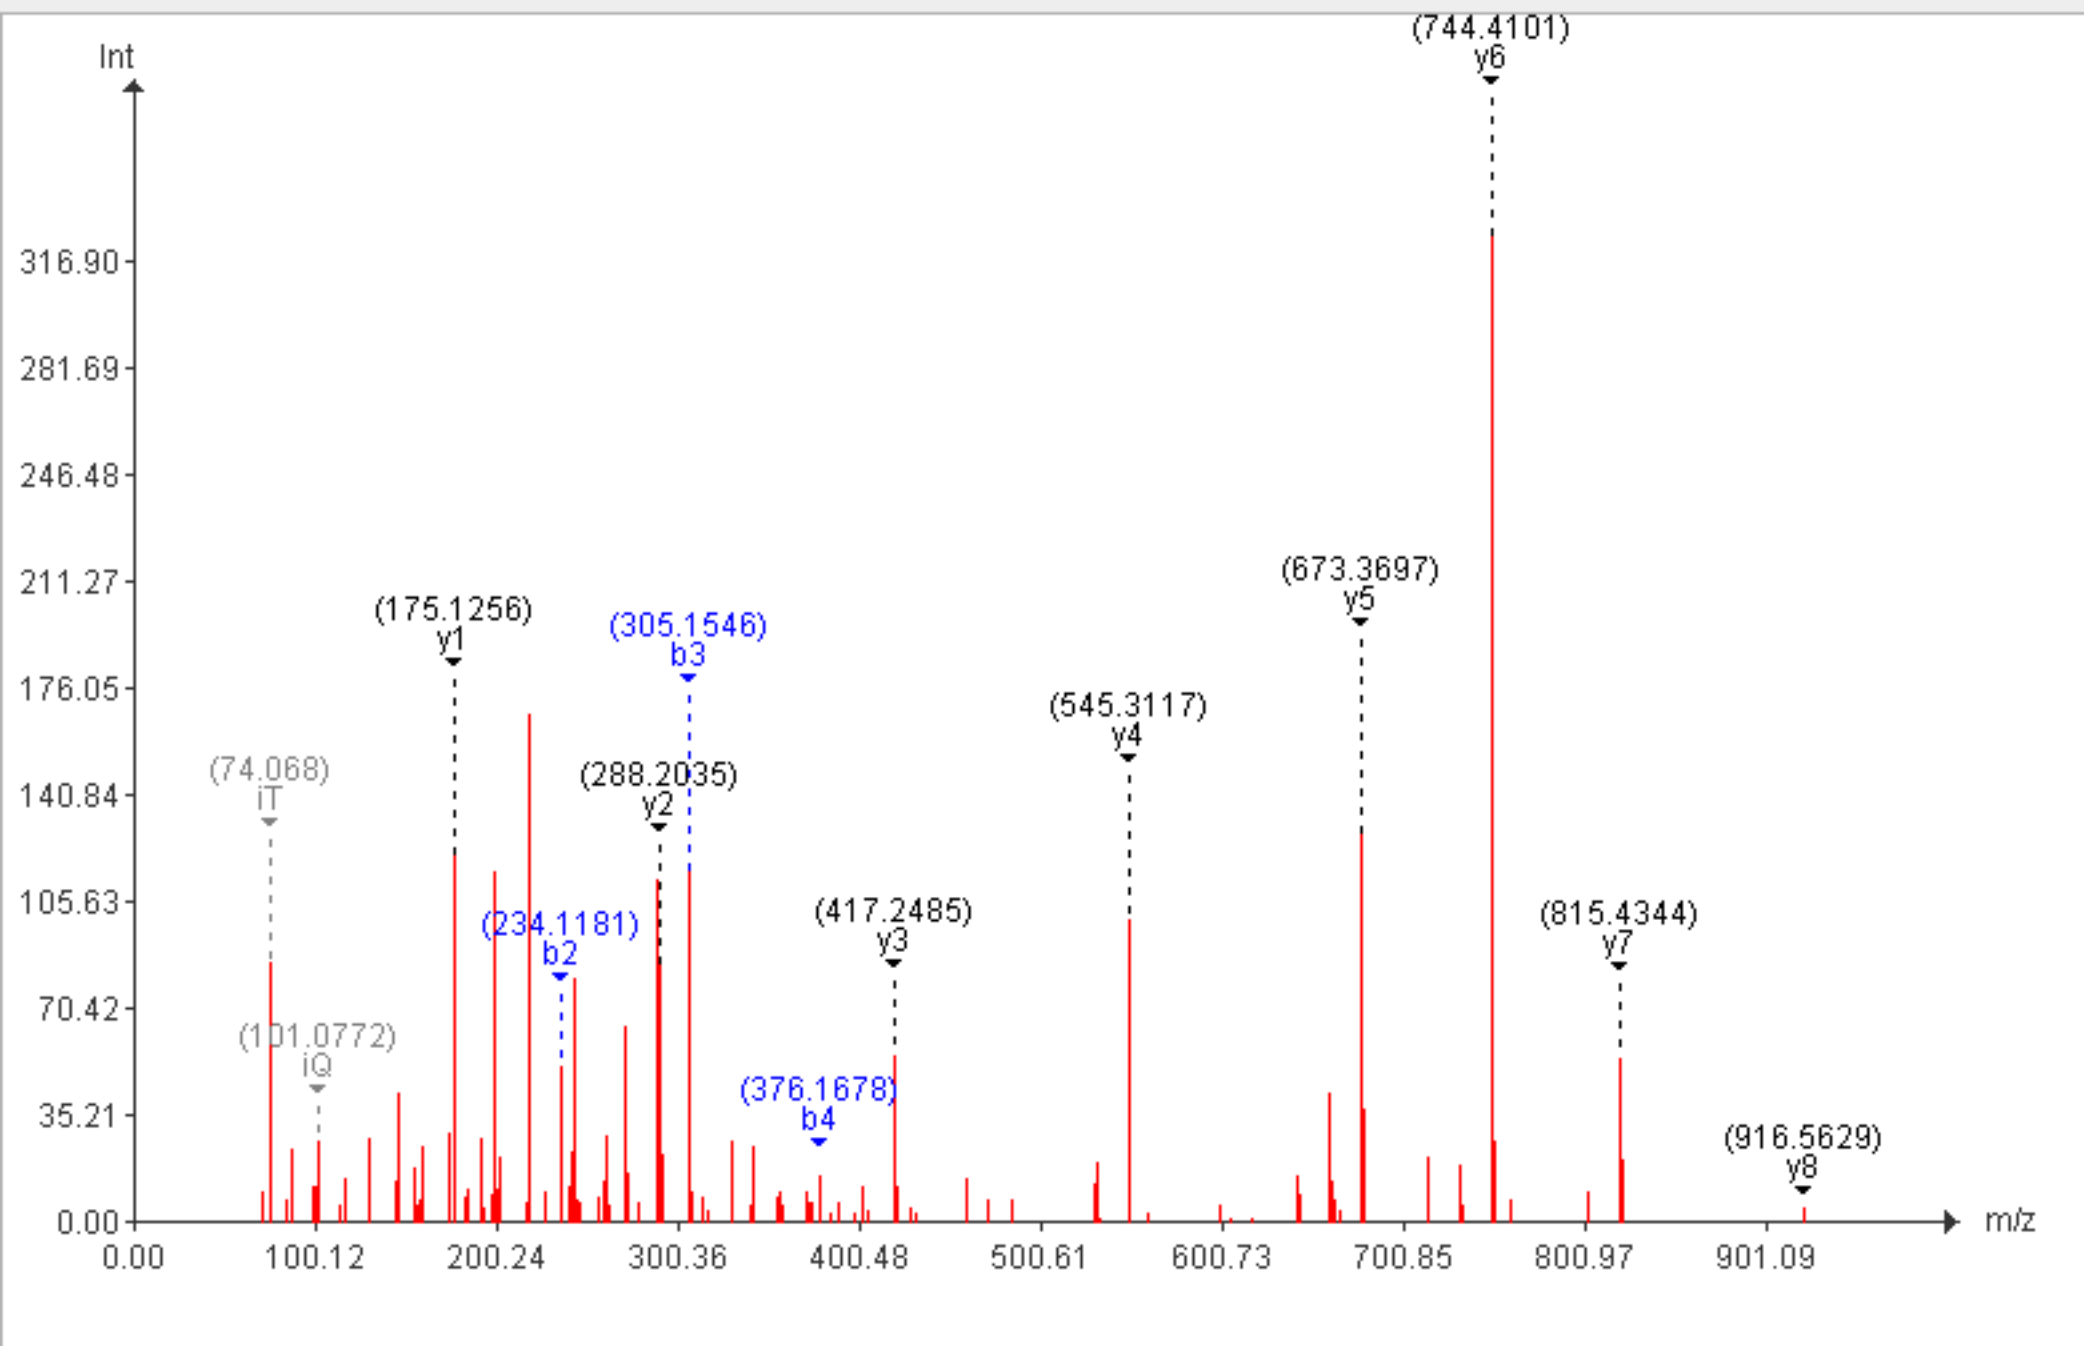

**AcD3-AAEDYAK(AcD3K\*)ER(C13\*)-COOH**  
**precursor mass: 574.7883 Da (charge: +2) protein: Q922B2 (20-28)**  
**score (threshold): 69.0 (30.0)**  
**instrument: Waters Q-TOF Premier**

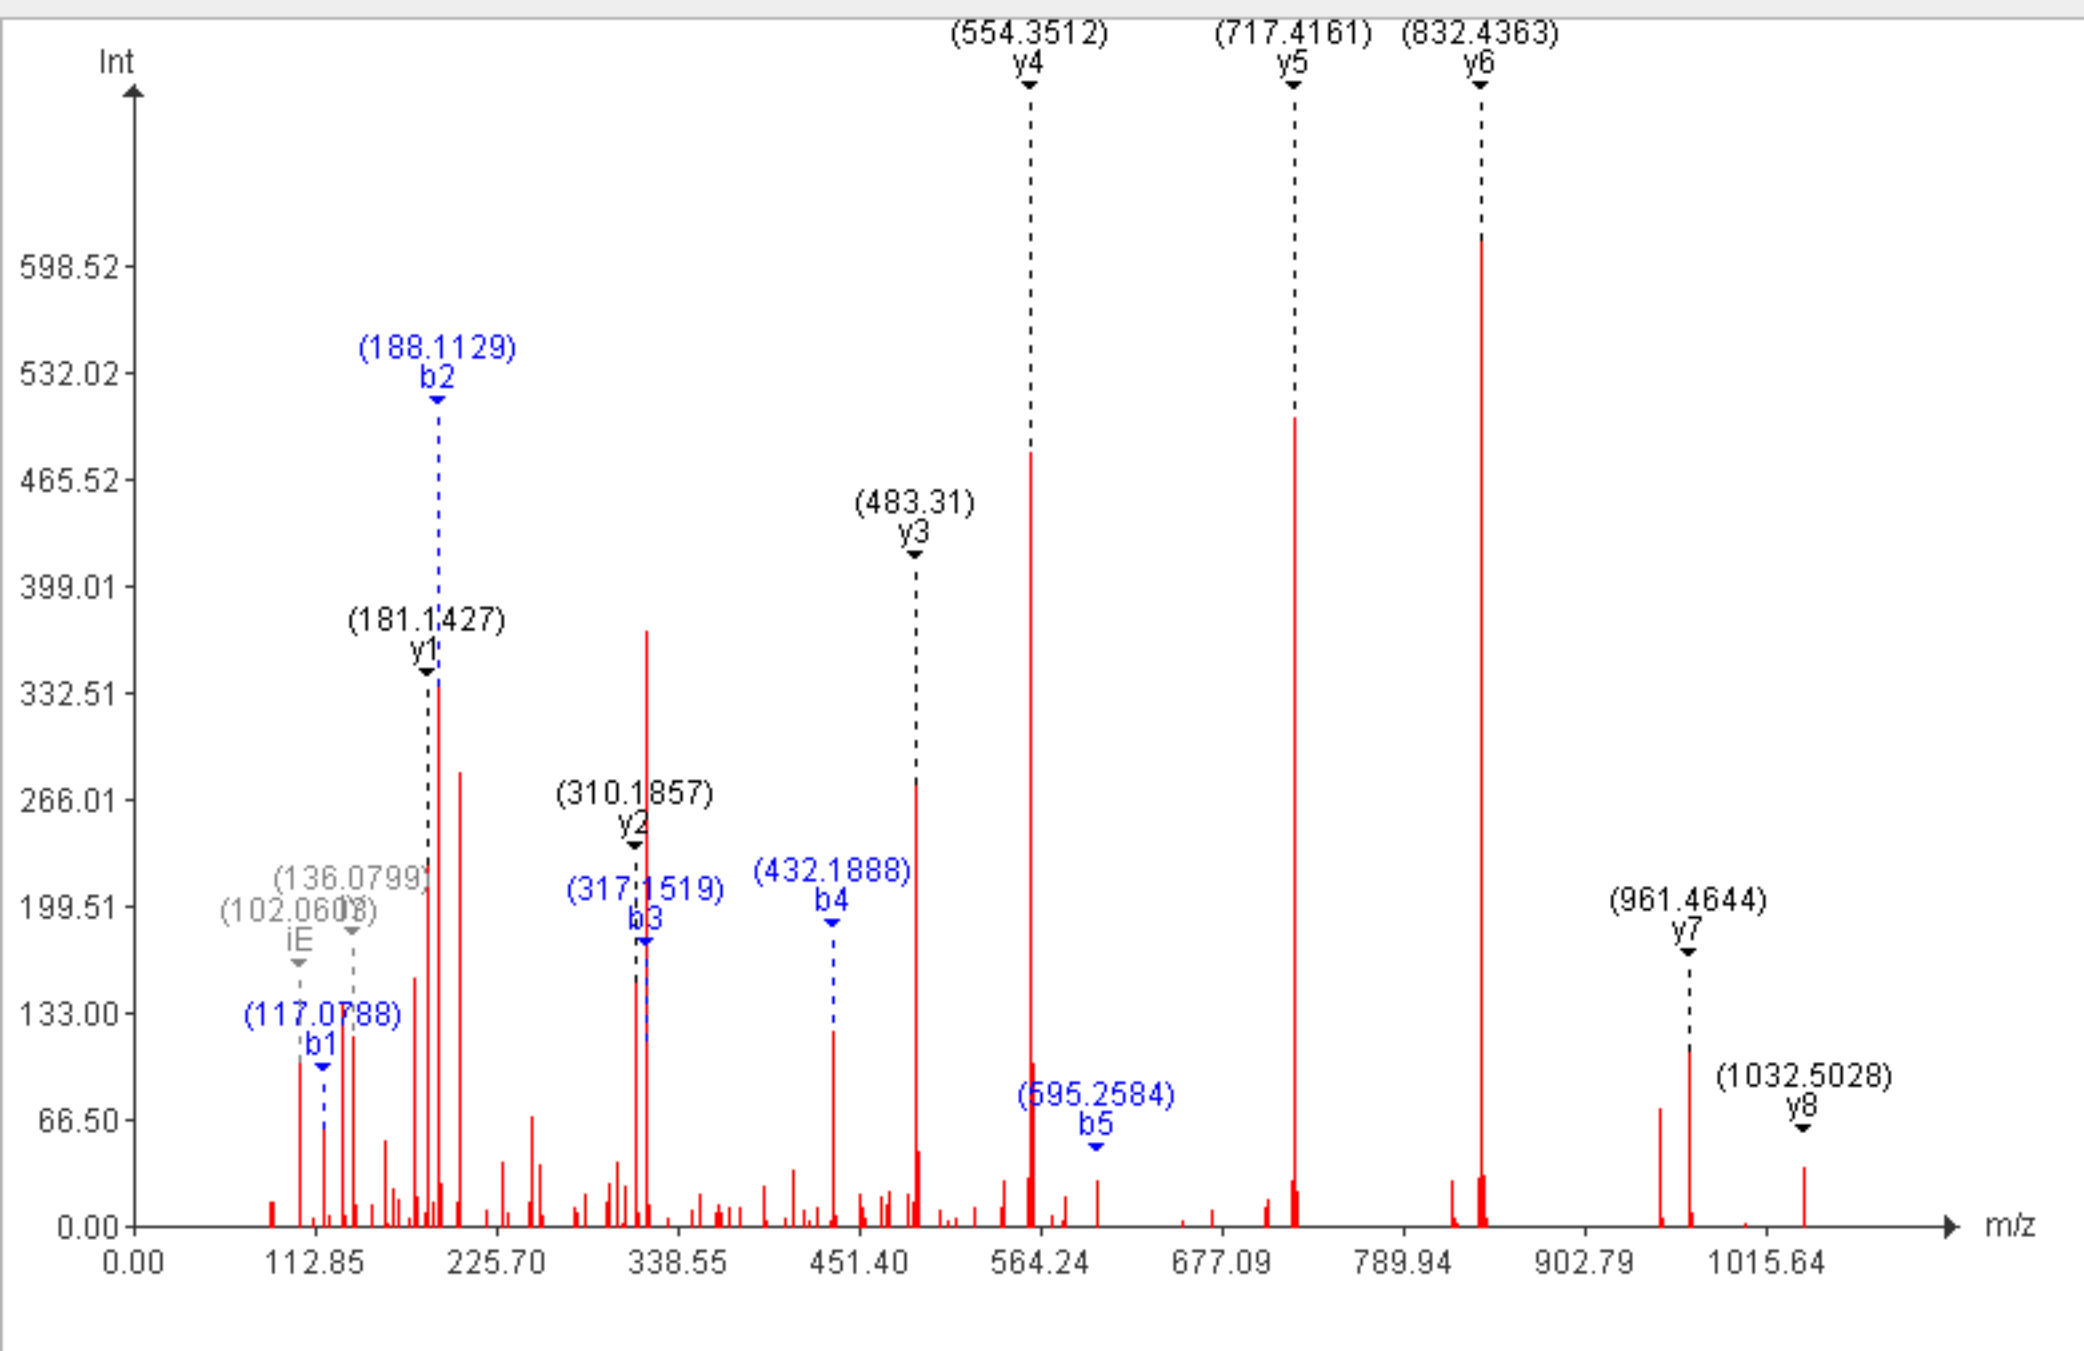

*AcD3-EDLEN(Dam)Q(Dam)TLR-COOH*

precursor mass: 582.7749 Da (charge: +2) protein: P70188 (250-258)

score (threshold): 70.0 (31.0)

instrument: Waters Q-TOF Premier

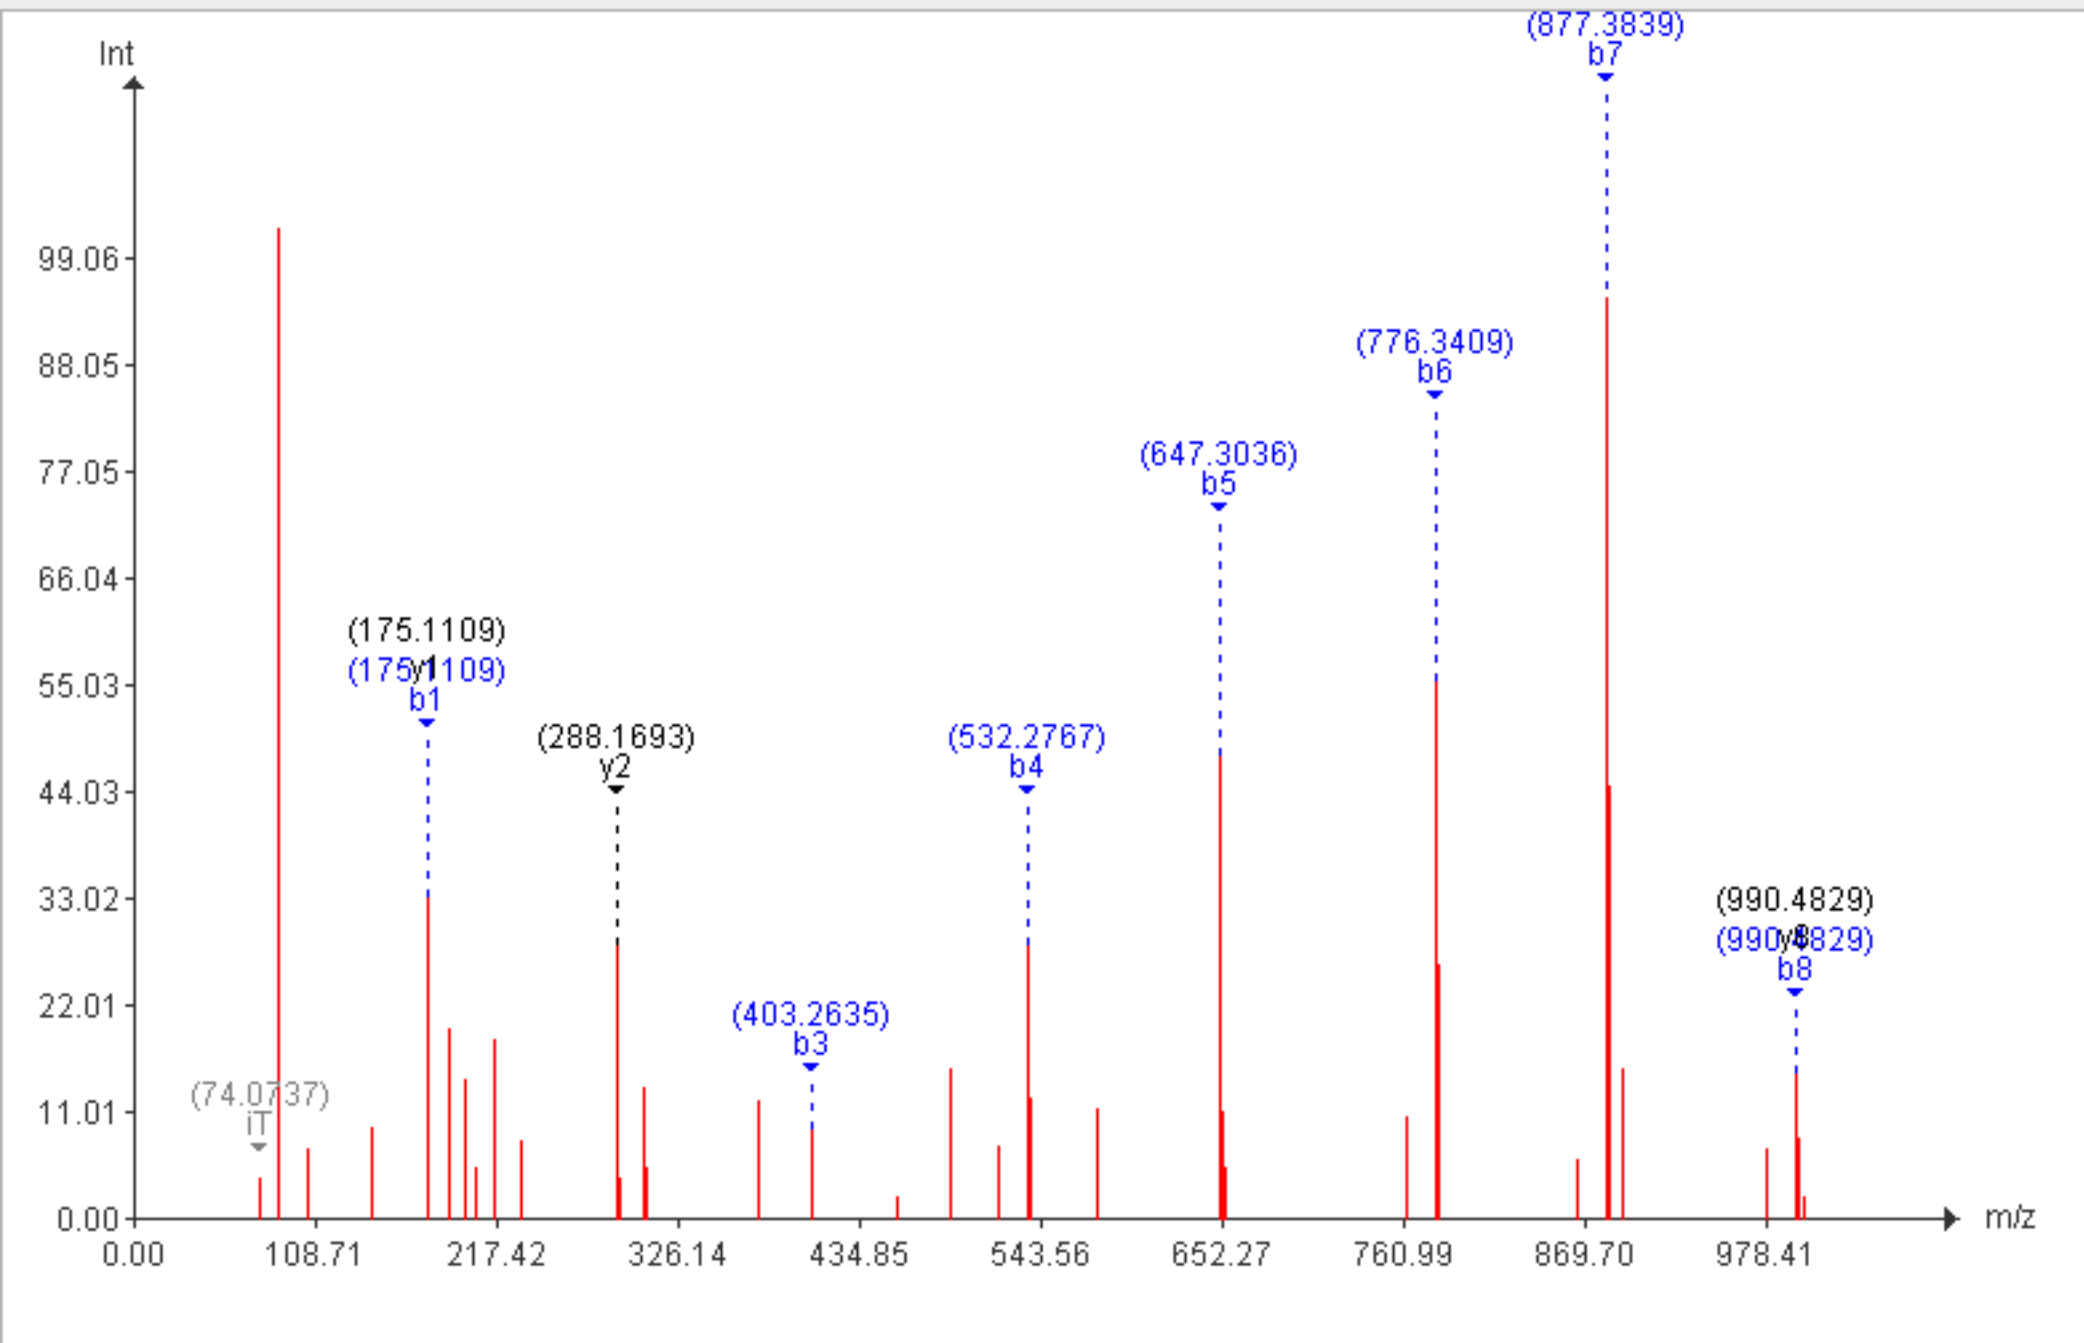

## **Supplemental Figure 2**

**List of identified low scoring MS/MS spectra (n=65)**

**AcD3-FSQLLNC(Cmm\*)PEFVPR-COOH**

**precursor mass: 826.2790 Da (charge: +2) protein: IPI00185919.3 (496-508)**

**score (threshold): 48.0 (35.0)**

**instrument: Bruker Esquire HCT**

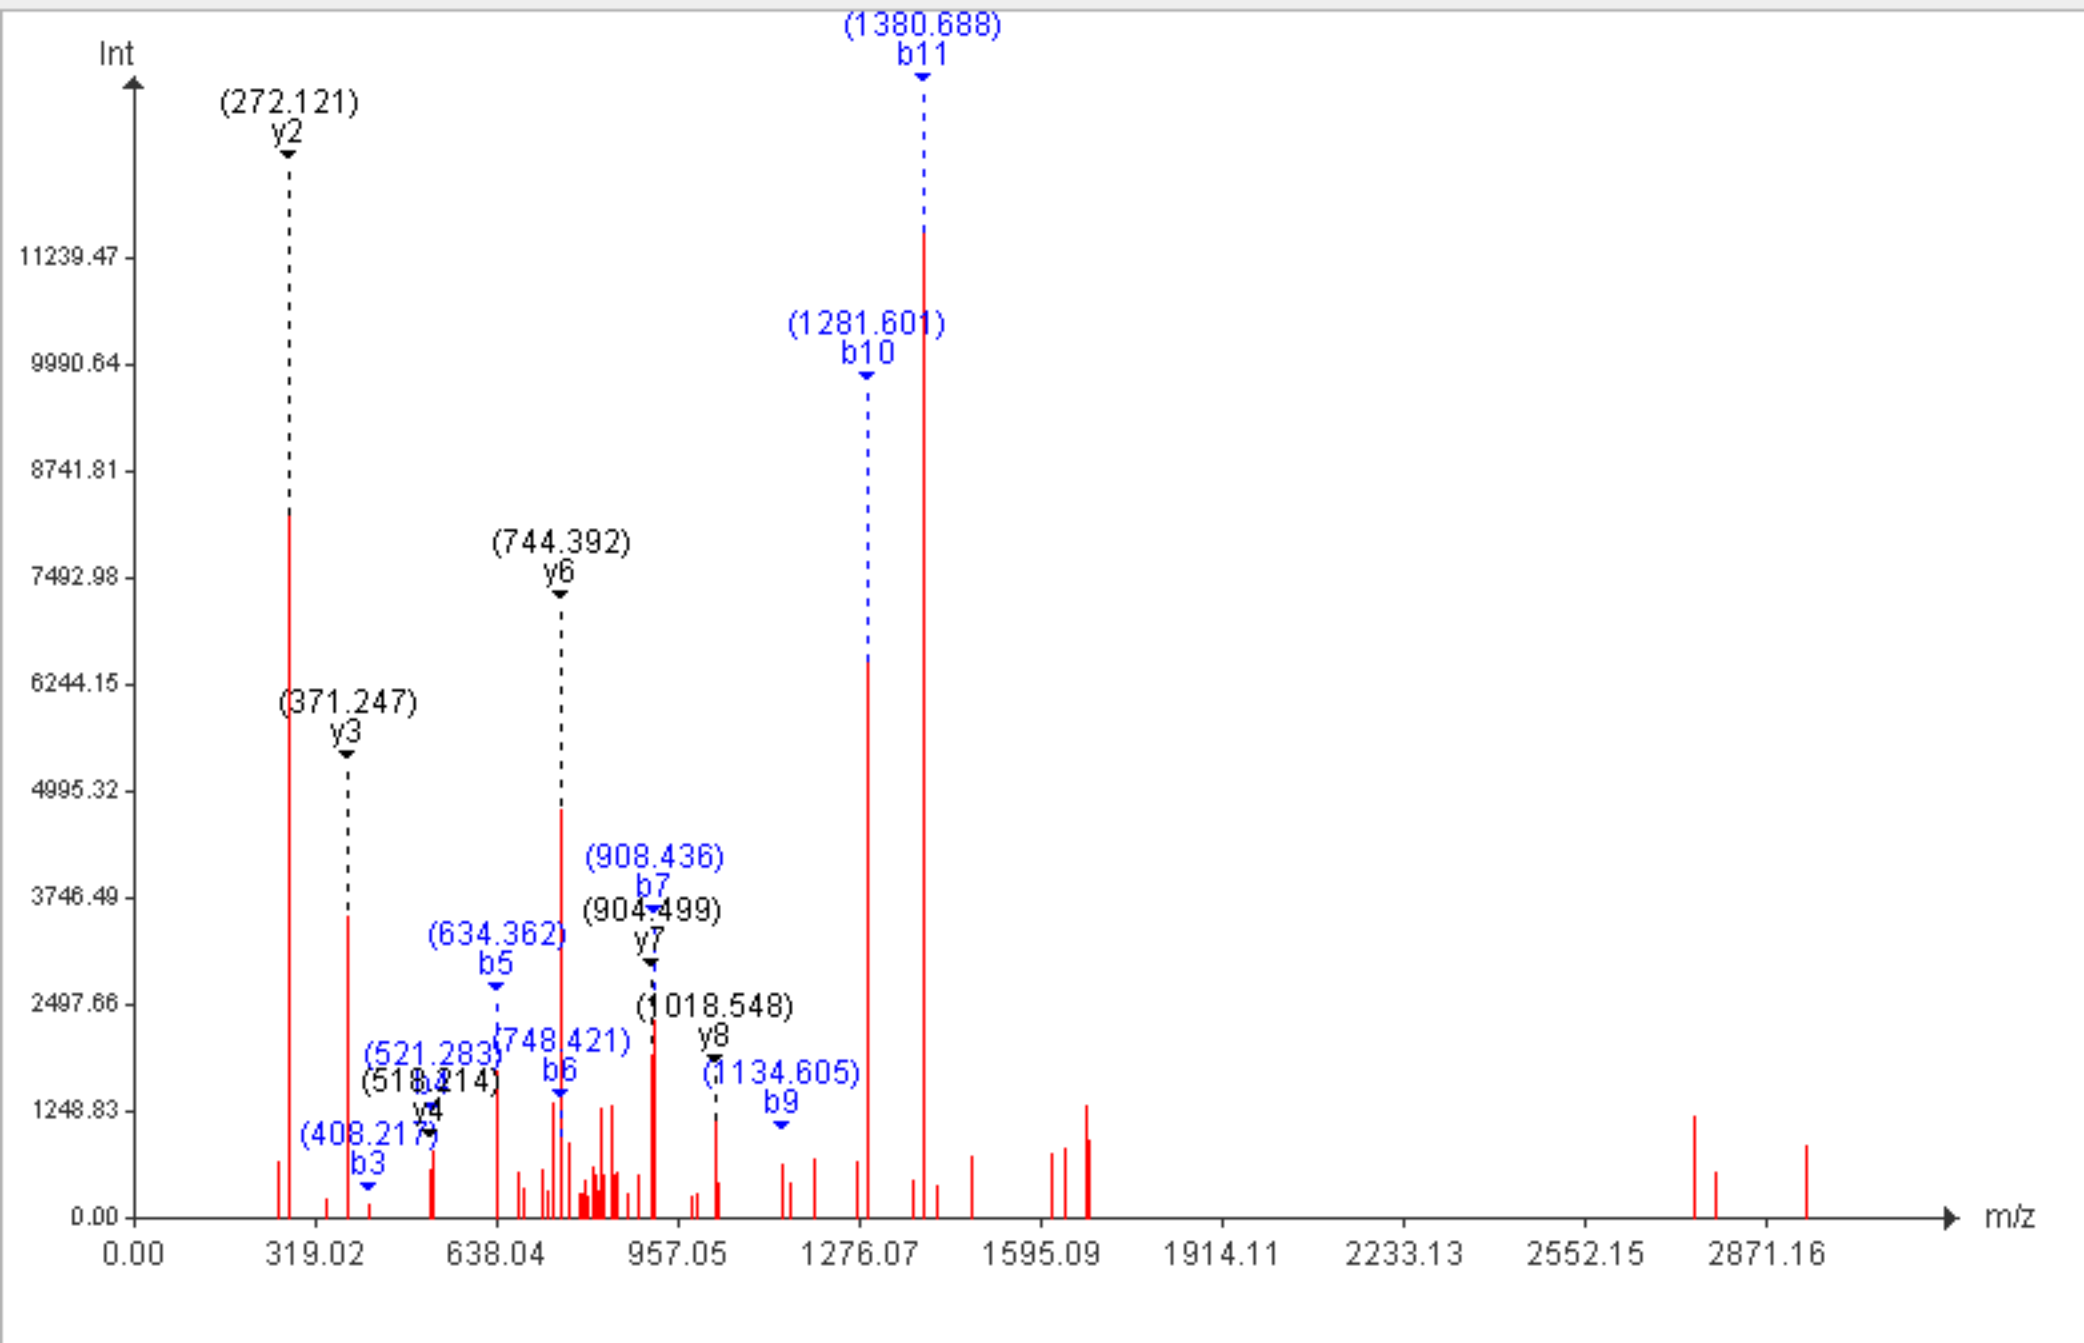

**AcD3-C(Cmm\*)LPGLAK(AcD3K\*)QPSFR-COOH**  
**precursor mass: 732.3520 Da (charge: +2) protein: P16675 (32-43)**  
**score (threshold): 50.0 (31.0)**  
**instrument: Bruker Esquire HCT**

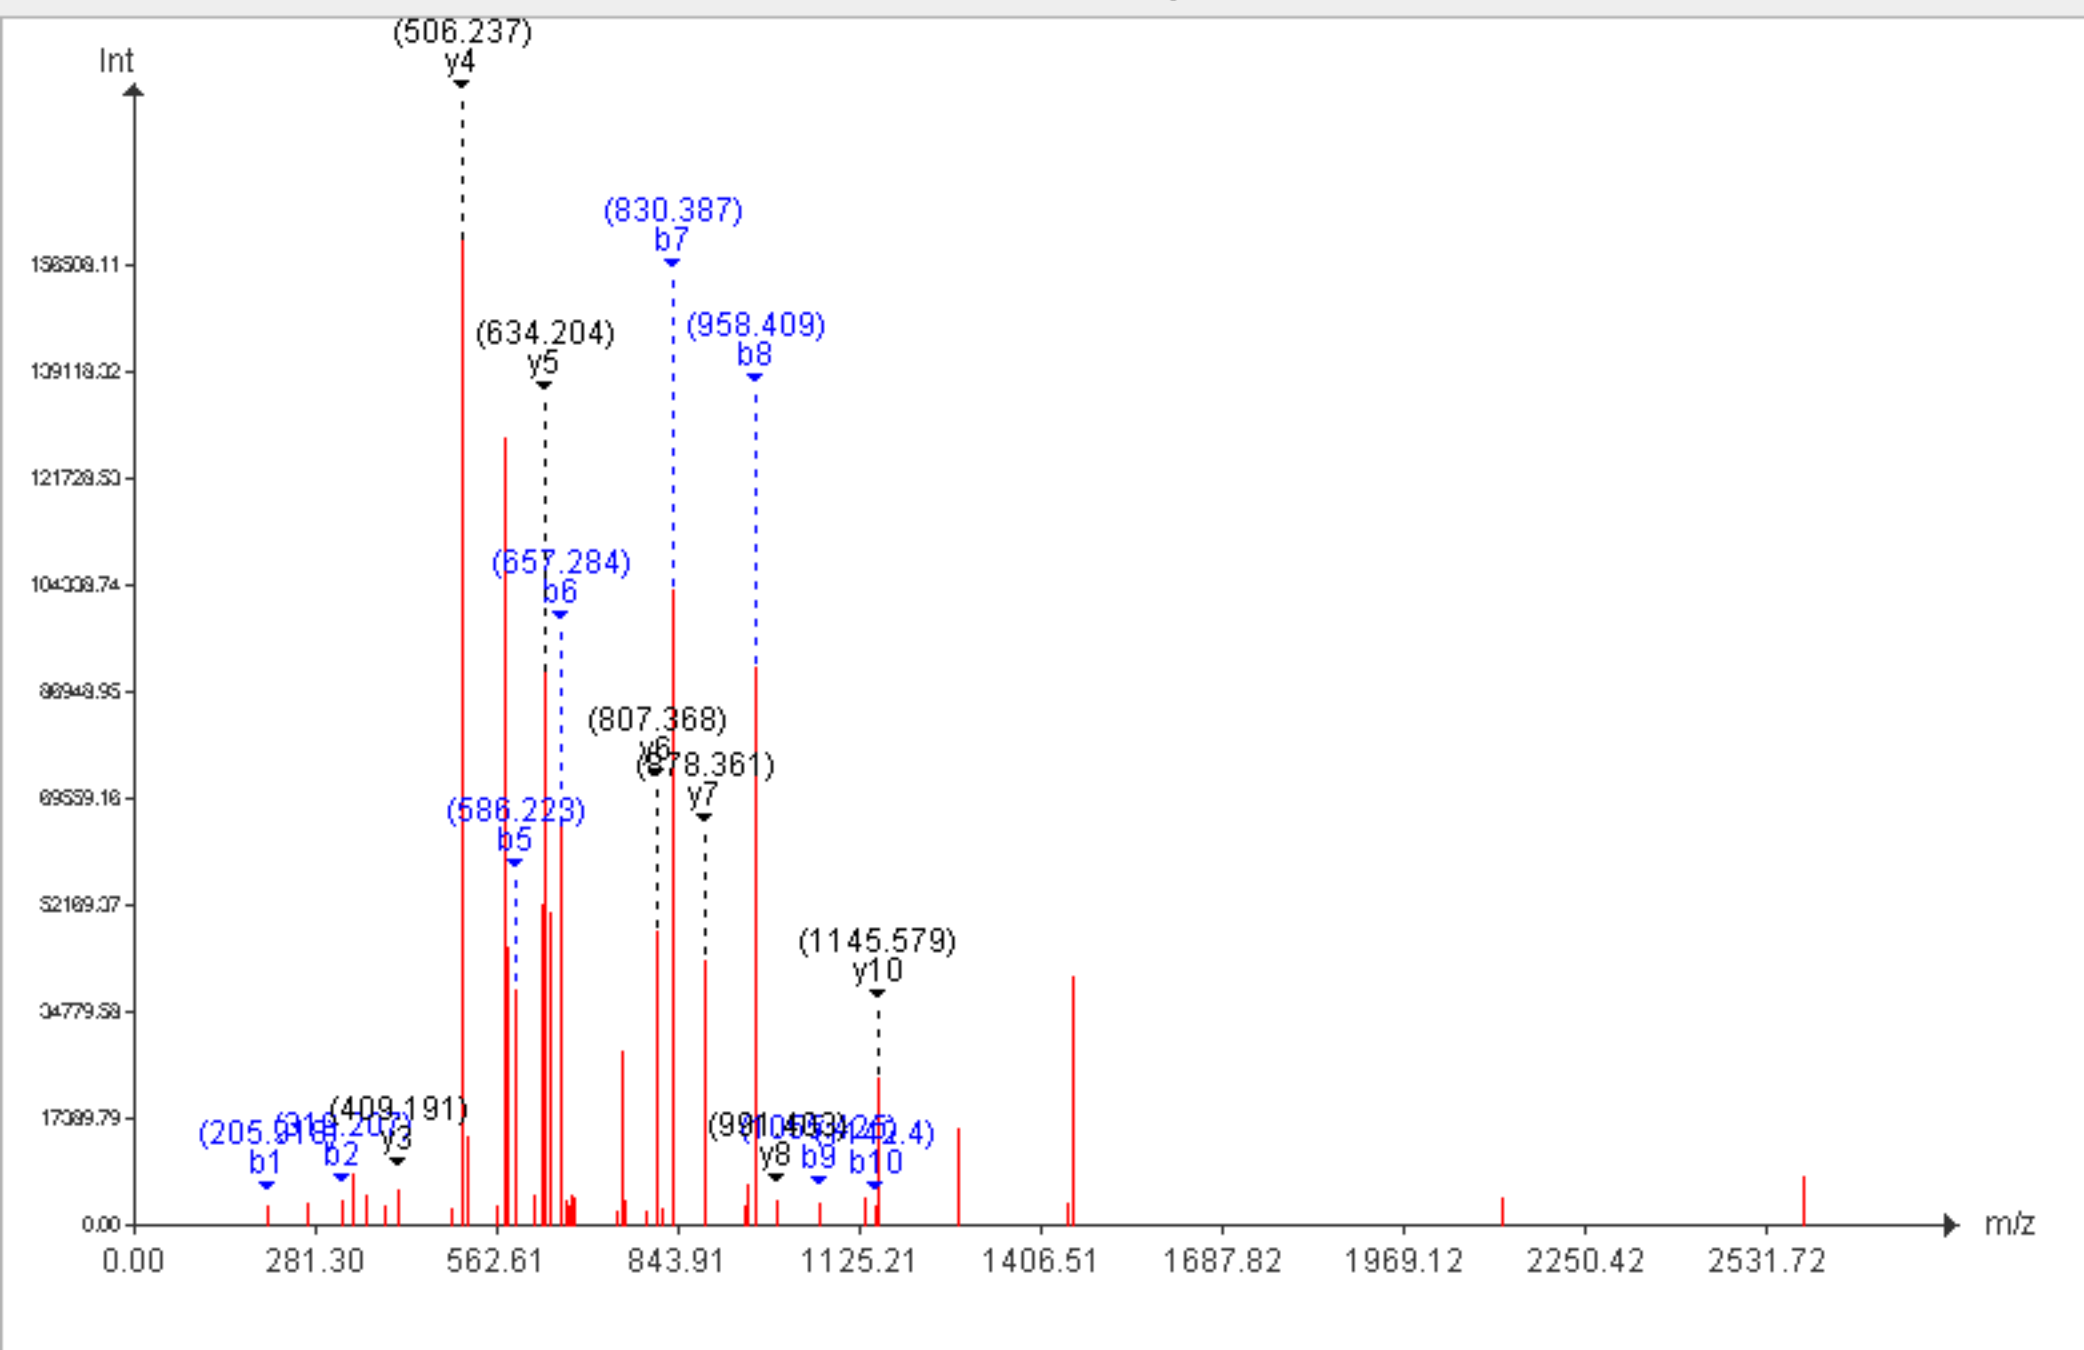

**AcD3-C(Cmm\*)LPGLAK(AcD3K\*)QPSFR(C13\*)-COOH**  
**precursor mass: 735.3890 Da (charge: +2) protein: P16675 (32-43)**  
**score (threshold): 40.0 (31.0)**  
**instrument: Bruker Esquire HCT**

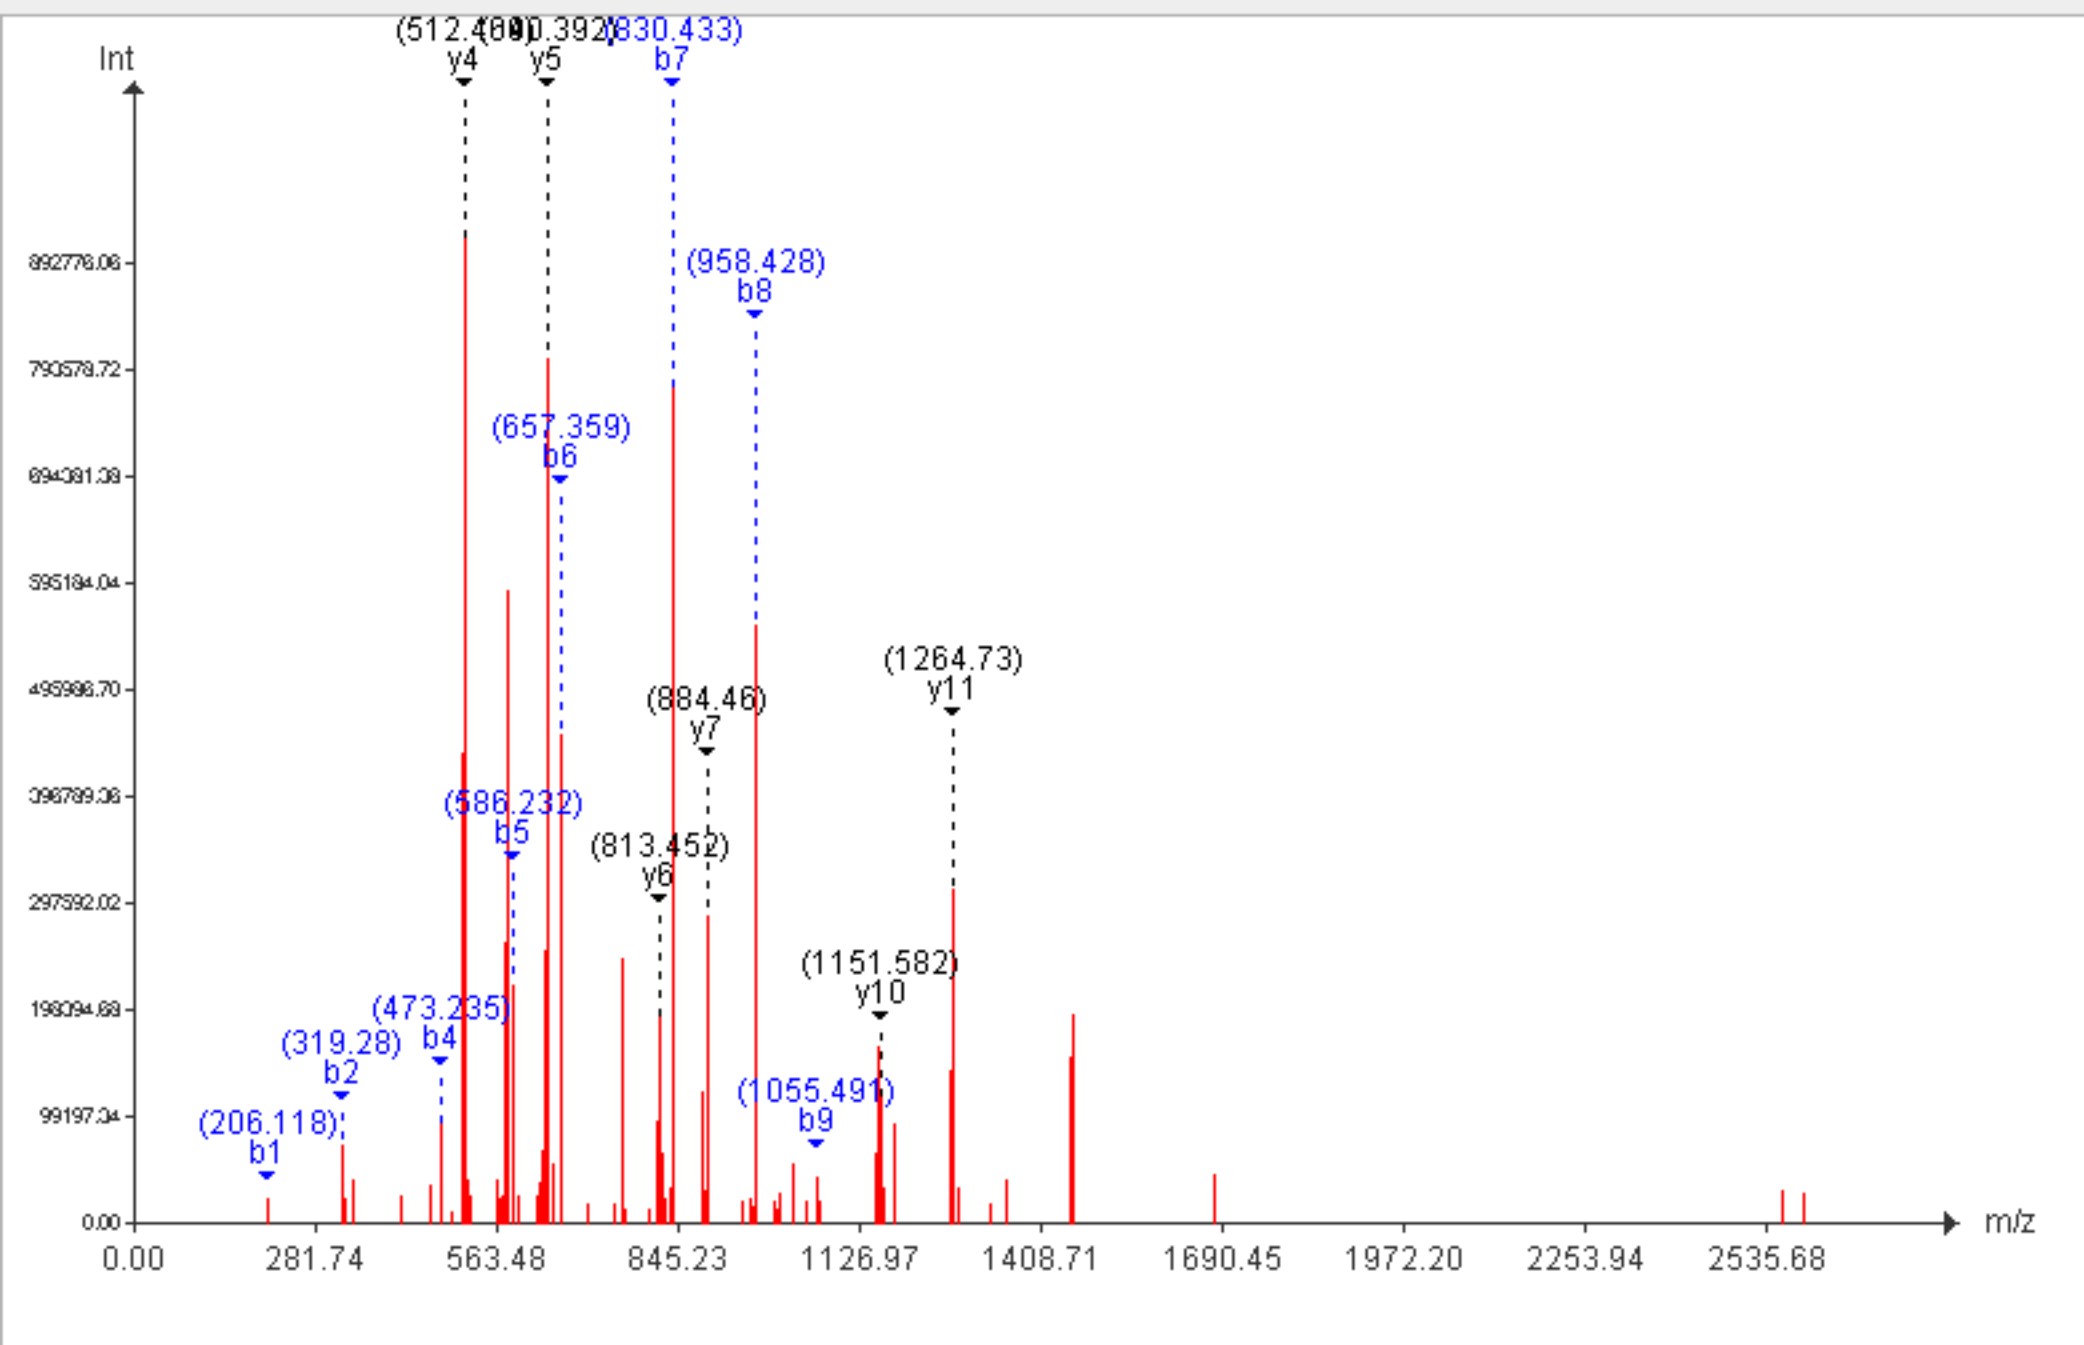

**AcD3-GQPGAFTC(Cmm\*)YLDAGLAR-COOH**  
**precursor mass: 871.4720 Da (charge: +2) protein: P47962 (136-151)**  
**score (threshold): 56.0 (31.0)**  
**instrument: Bruker Esquire HCT**

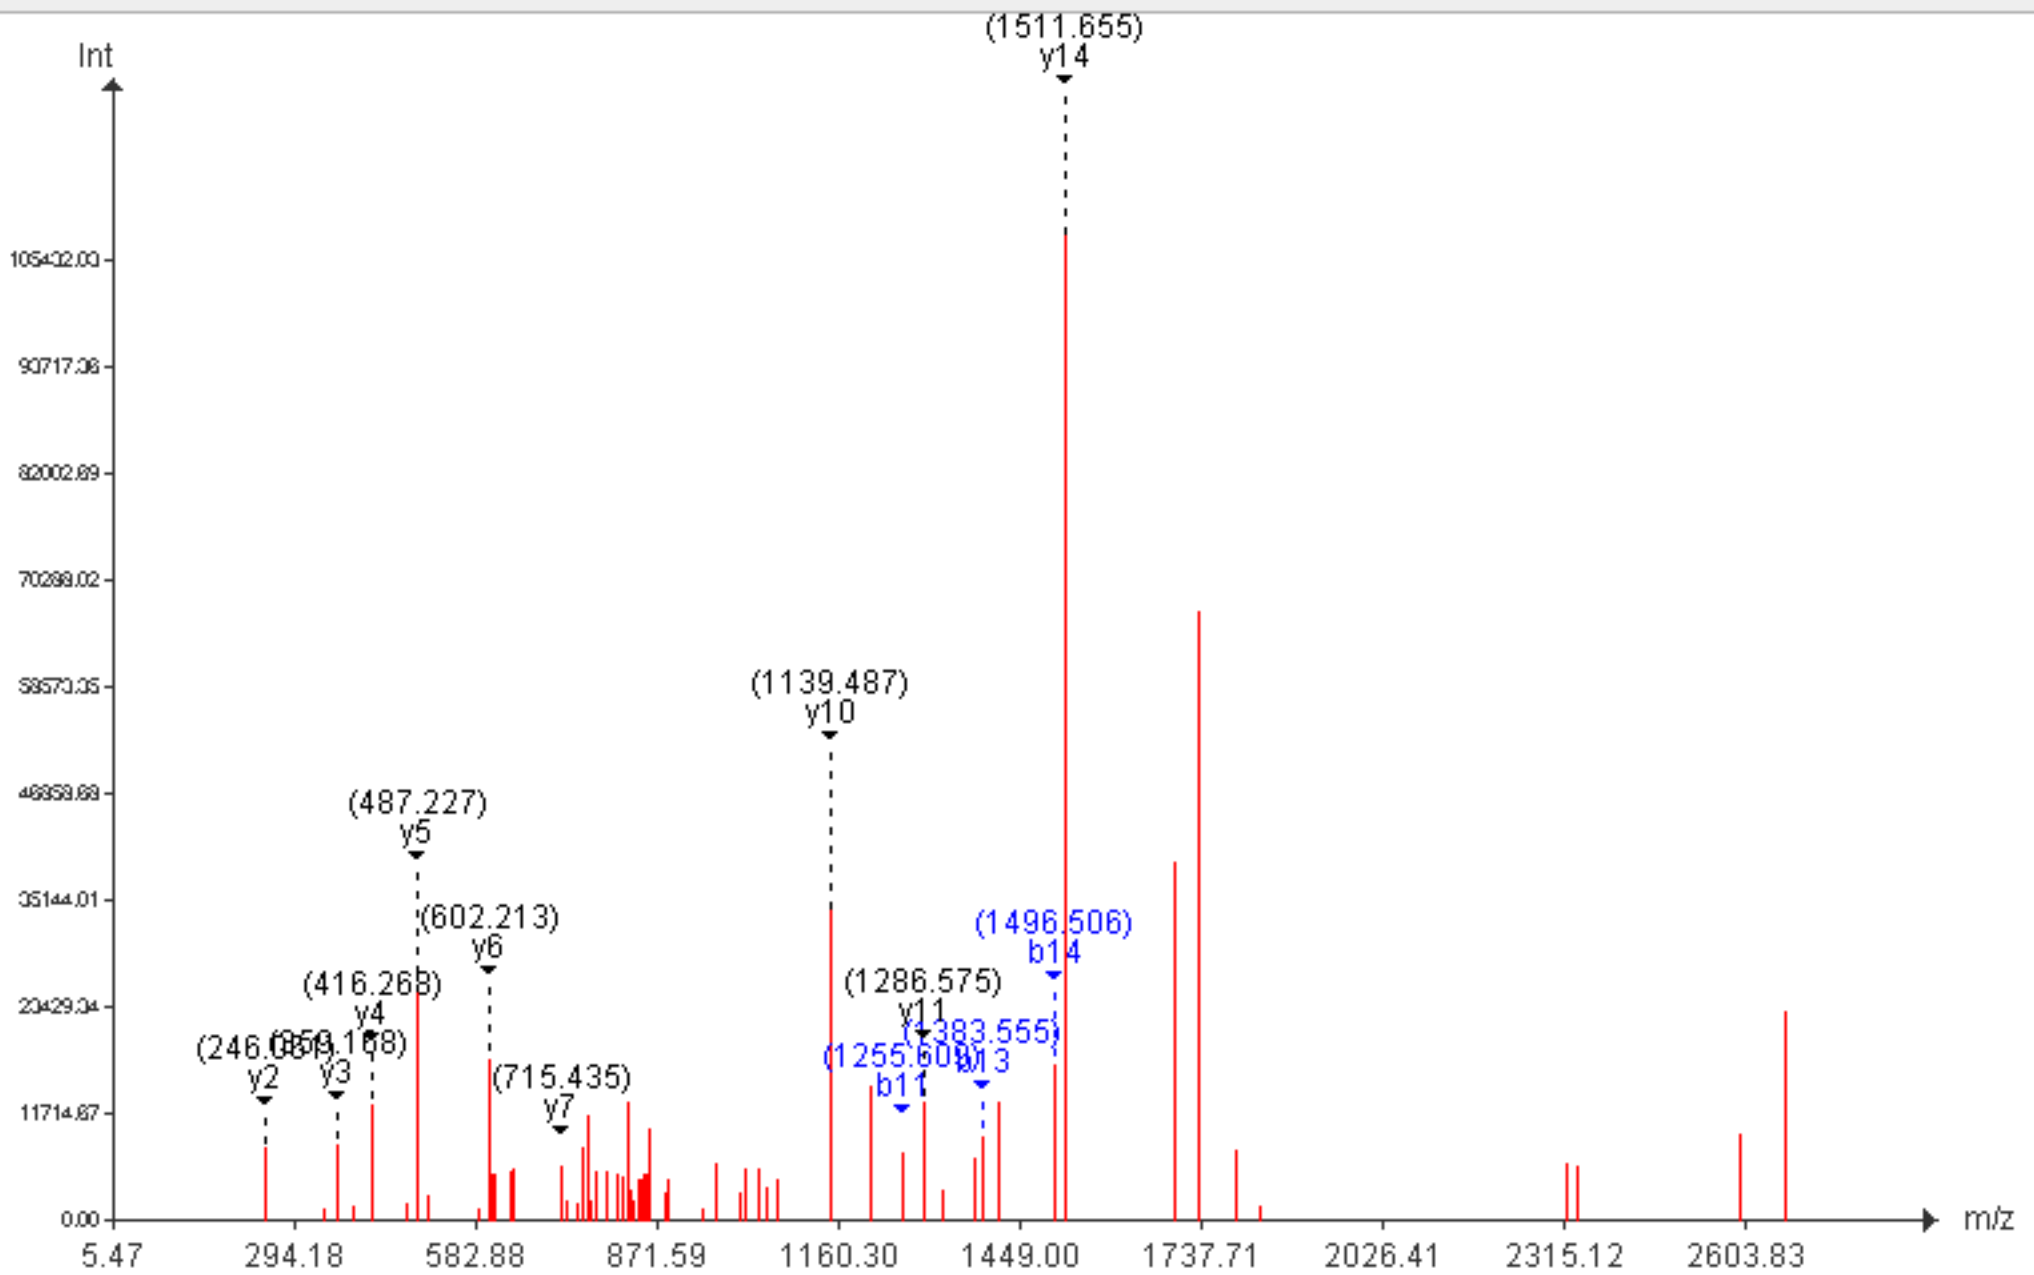



**AcD3-SLK(AcD3K\*)EALTYDGALLGDR(C13\*)-COOH**  
**precursor mass: 909.5150 Da (charge: +2) protein: Q9WUK2 (93-108)**  
**score (threshold): 46.0 (31.0)**  
**instrument: Bruker Esquire HCT**

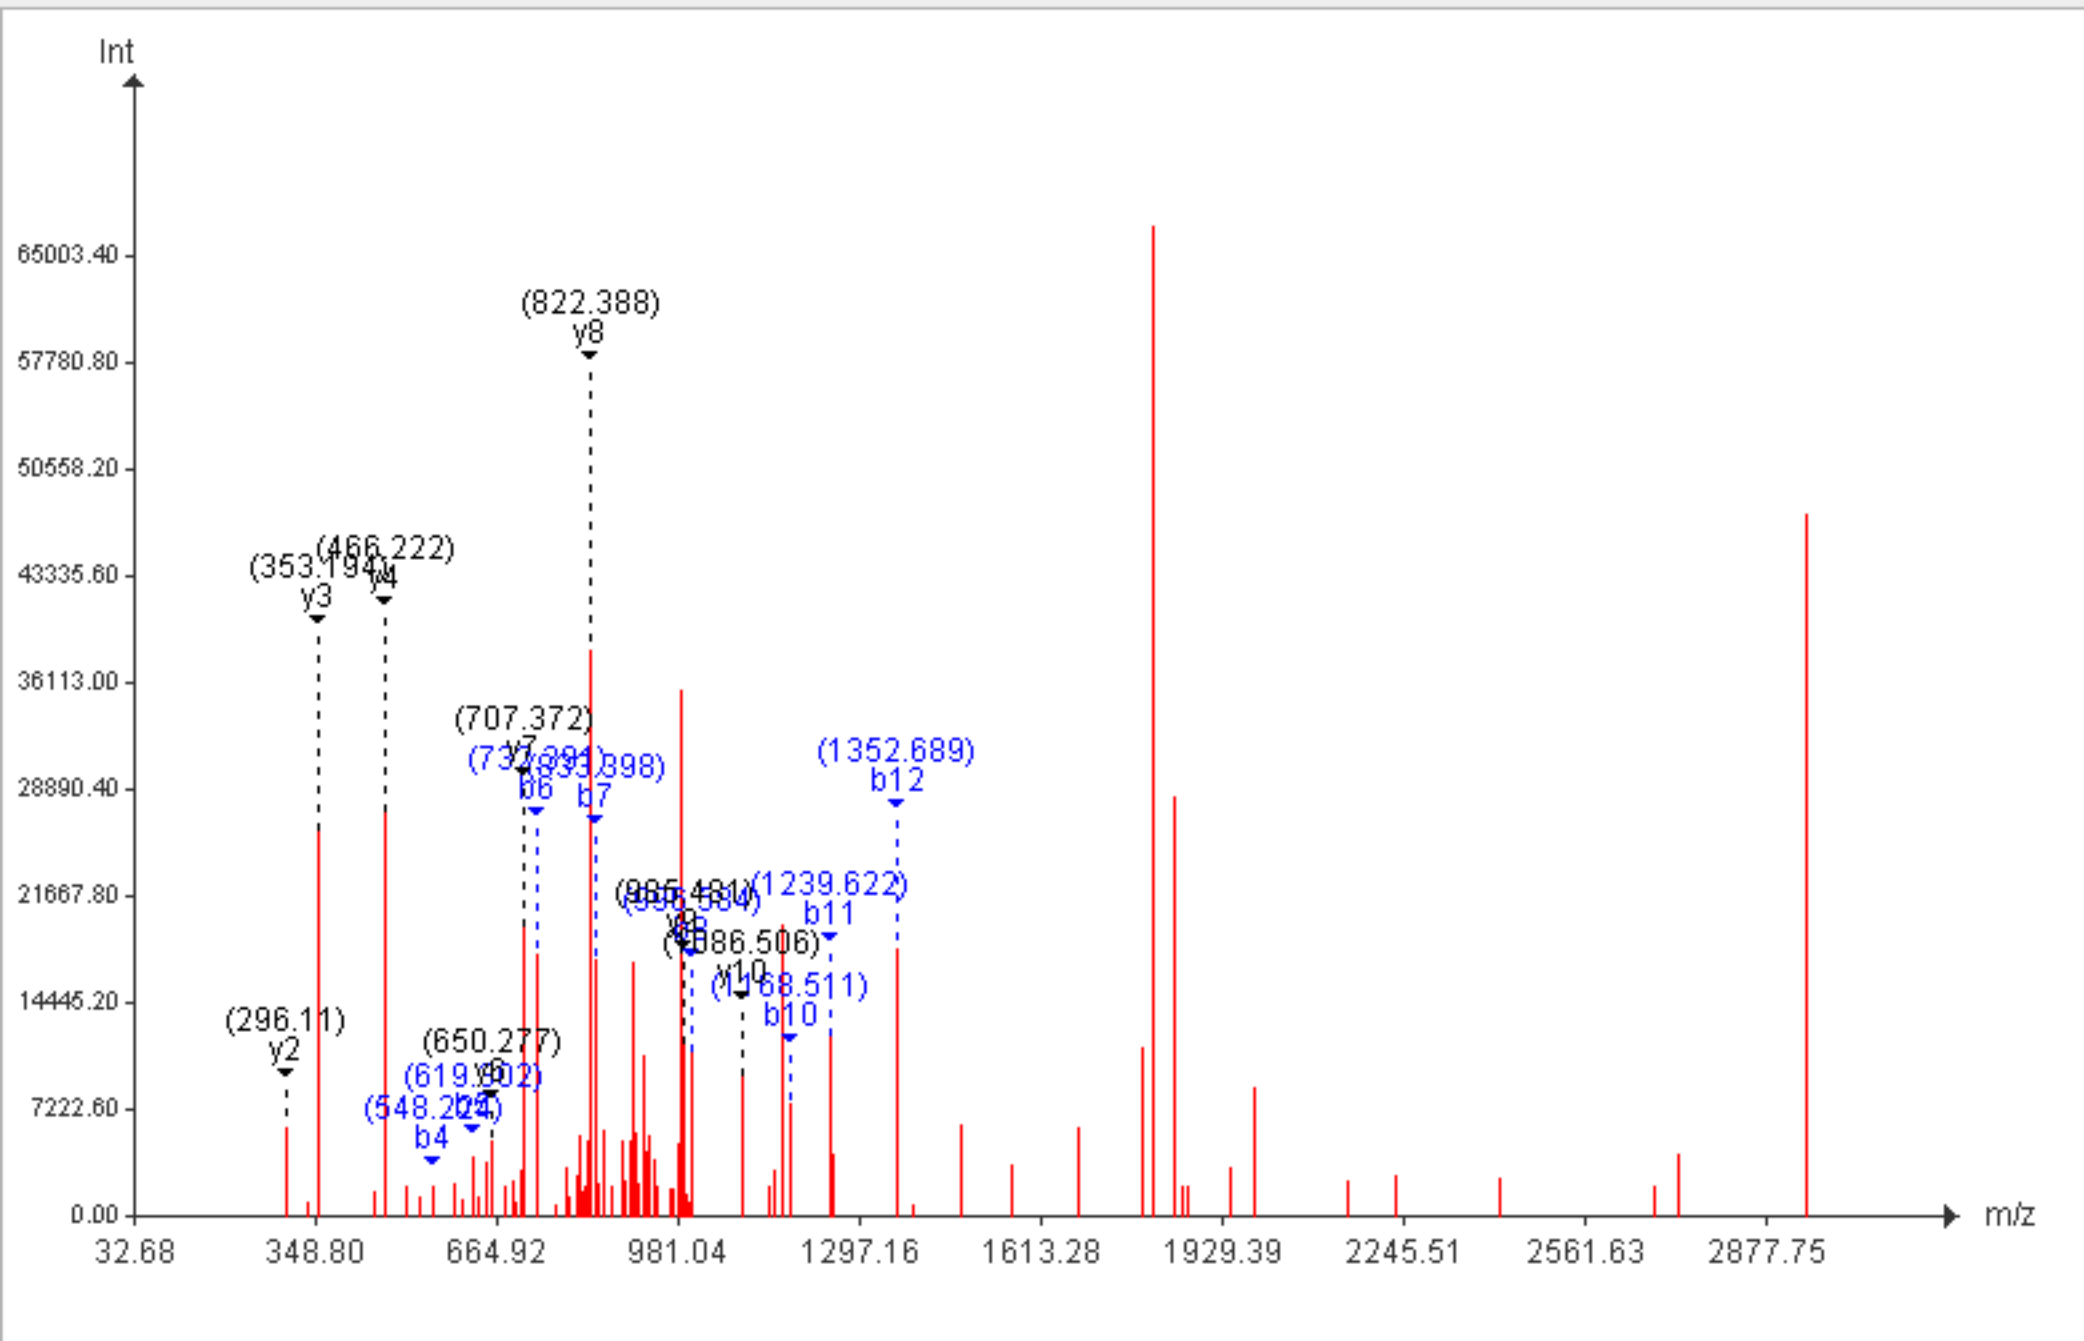

**AcD3-GLAVTPVPVVGSGM(Mox)TR(C13\*)-COOH**  
**precursor mass: 939.0150 Da (charge: +2) protein: P26369 (129-146)**  
**score (threshold): 31.0 (31.0)**  
**instrument: Bruker Esquire HCT**

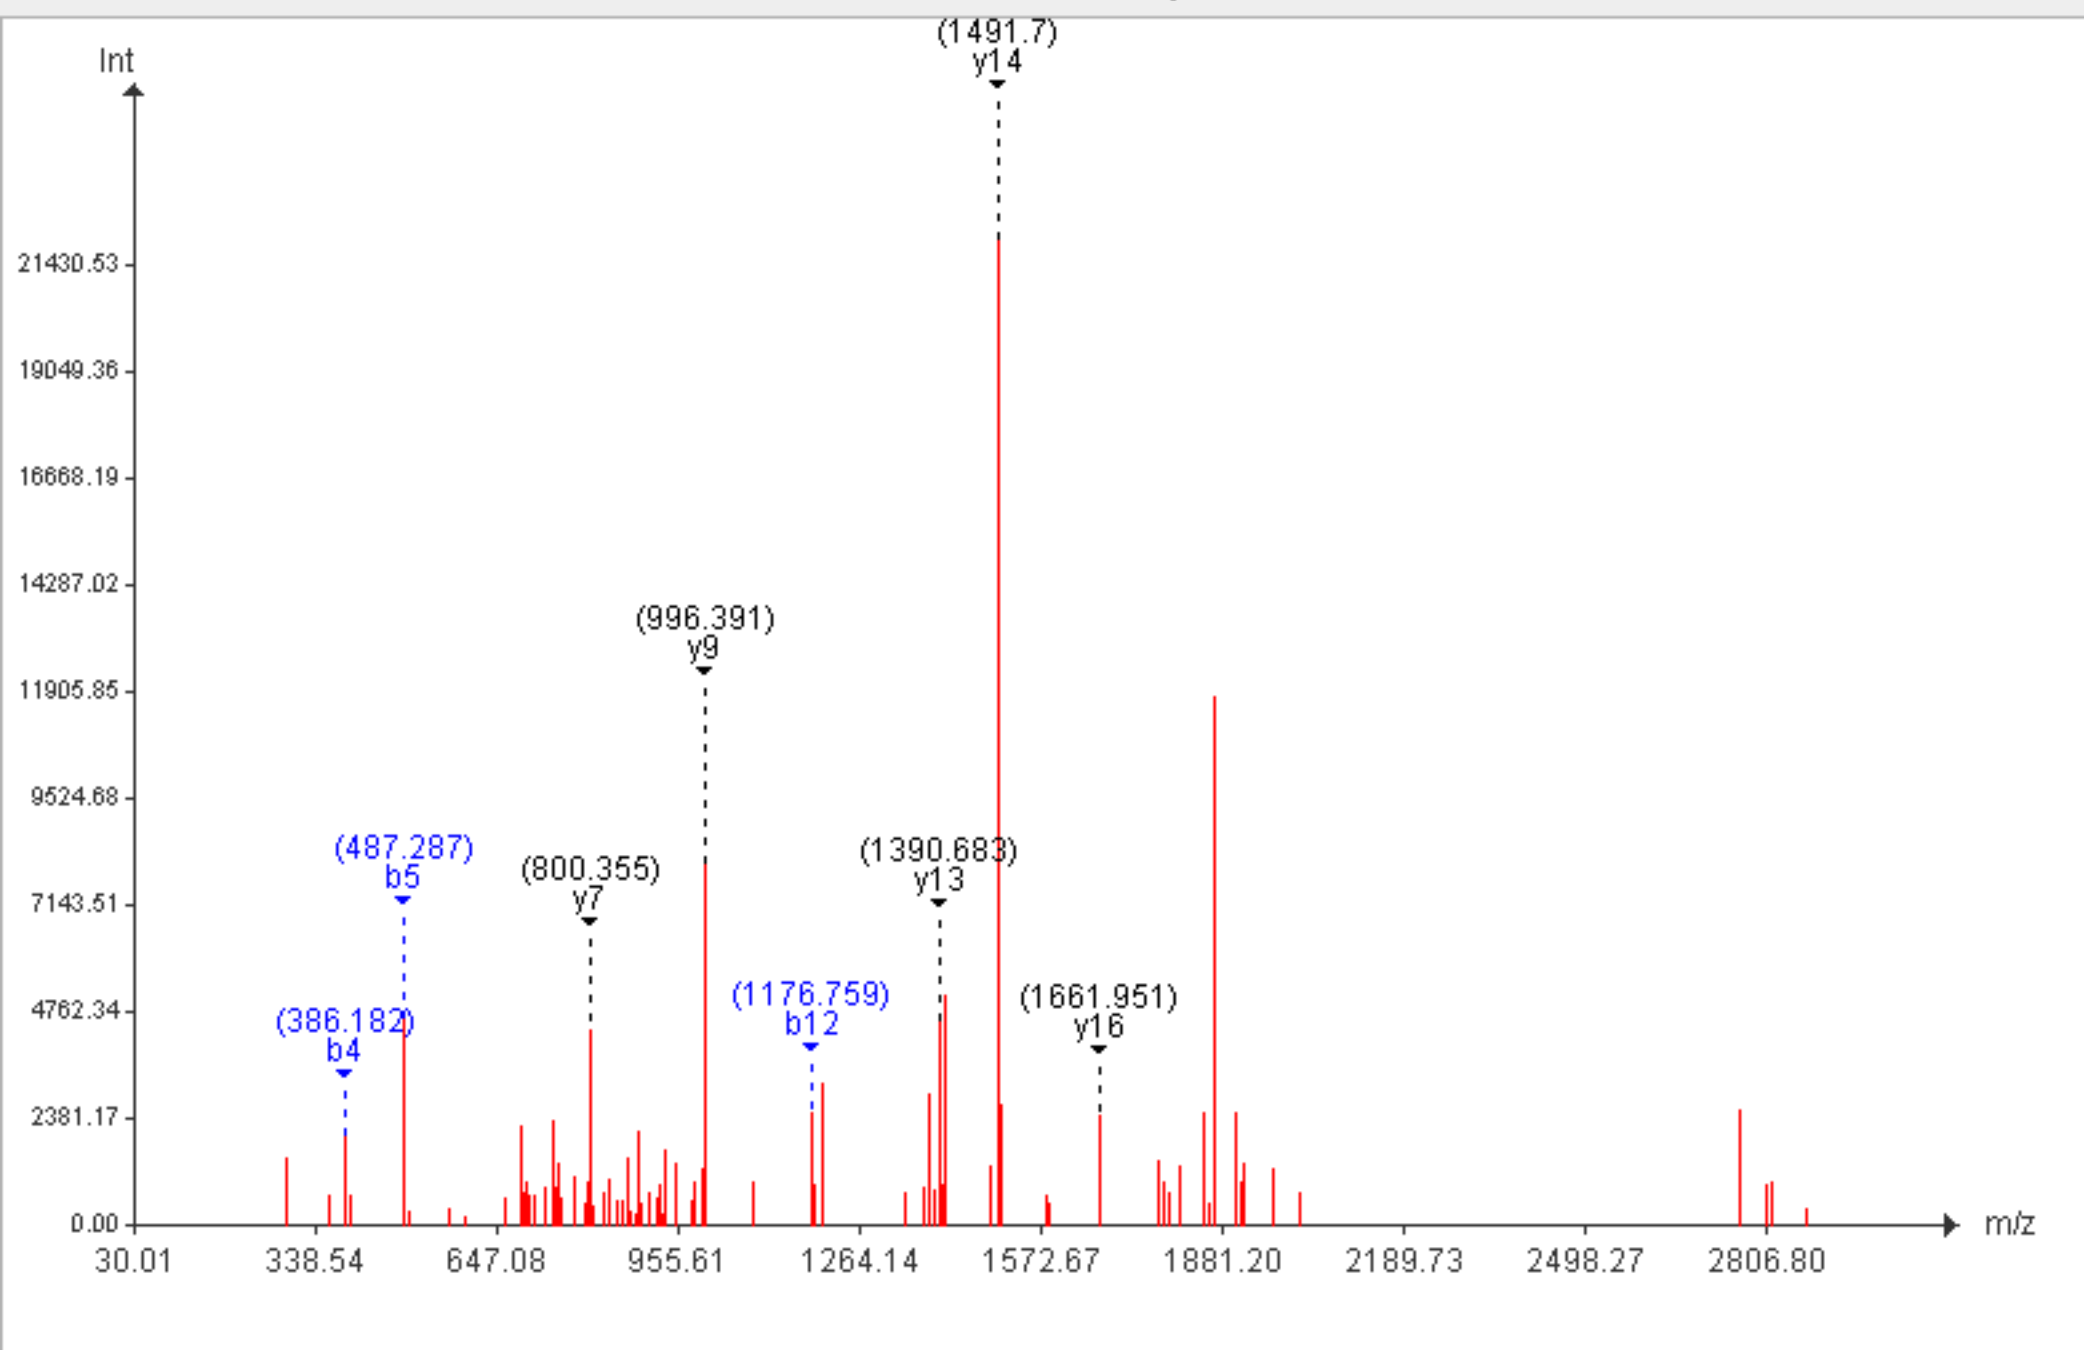

**AcD3-GLAVTPVVPVGSQM(Mox)TR-COOH**  
**precursor mass: 935.9680 Da (charge: +2) protein: P26369 (129-146)**  
**score (threshold): 37.0 (31.0)**  
**instrument: Bruker Esquire HCT**

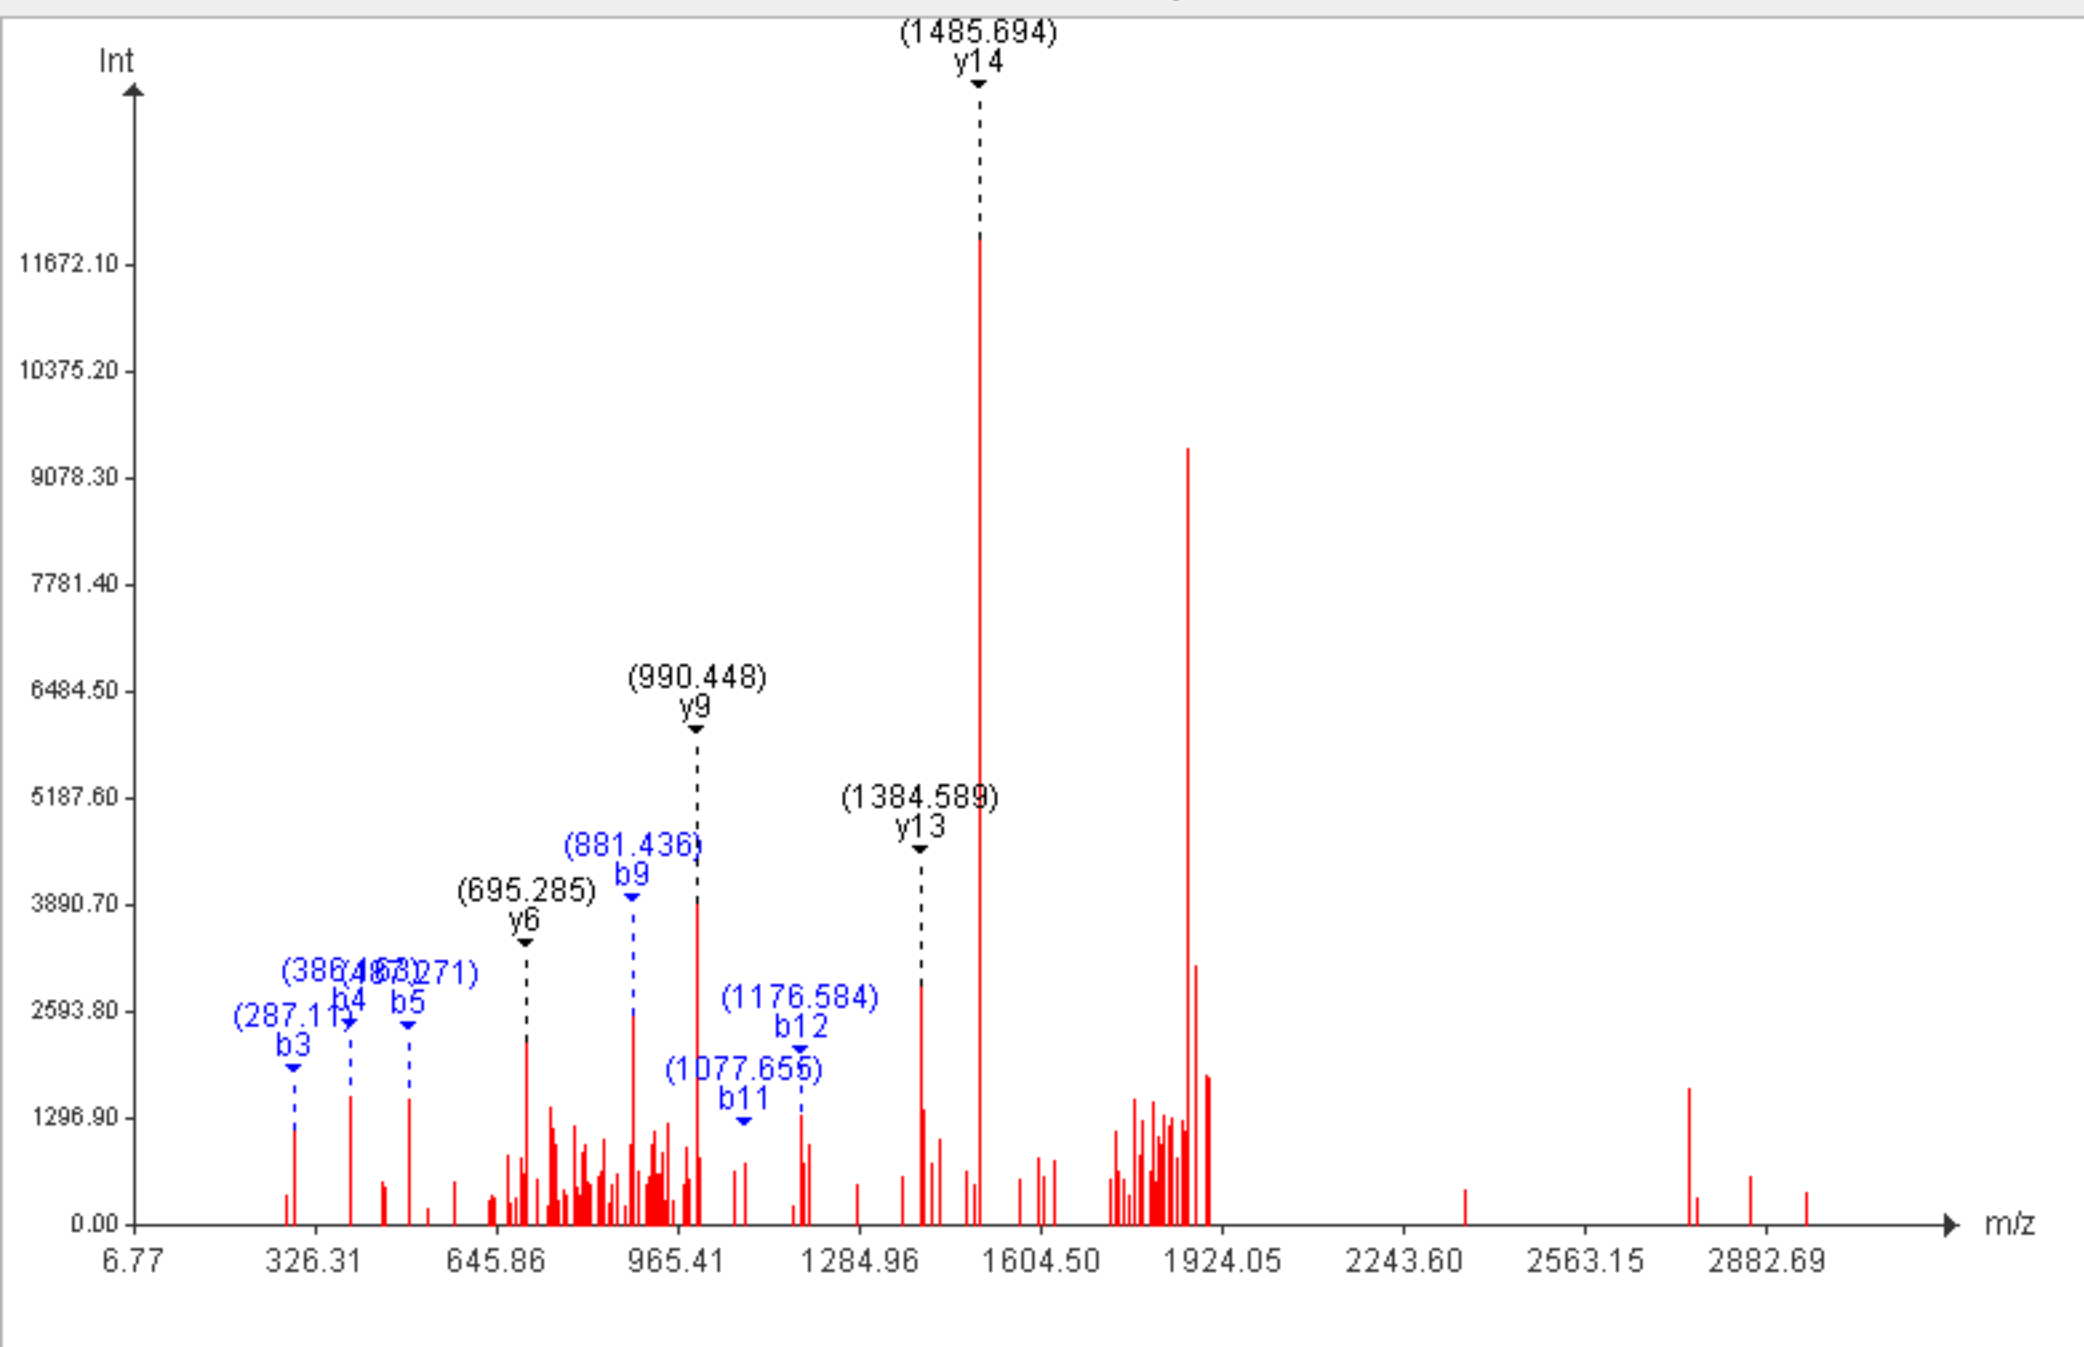

**AcD3-C(Cmm\*)LPGLAK(AcD3K\*)QPSFR-COOH**  
**precursor mass: 732.4140 Da (charge: +2) protein: P16675 (32-43)**  
**score (threshold): 42.0 (31.0)**  
**instrument: Bruker Esquire HCT**

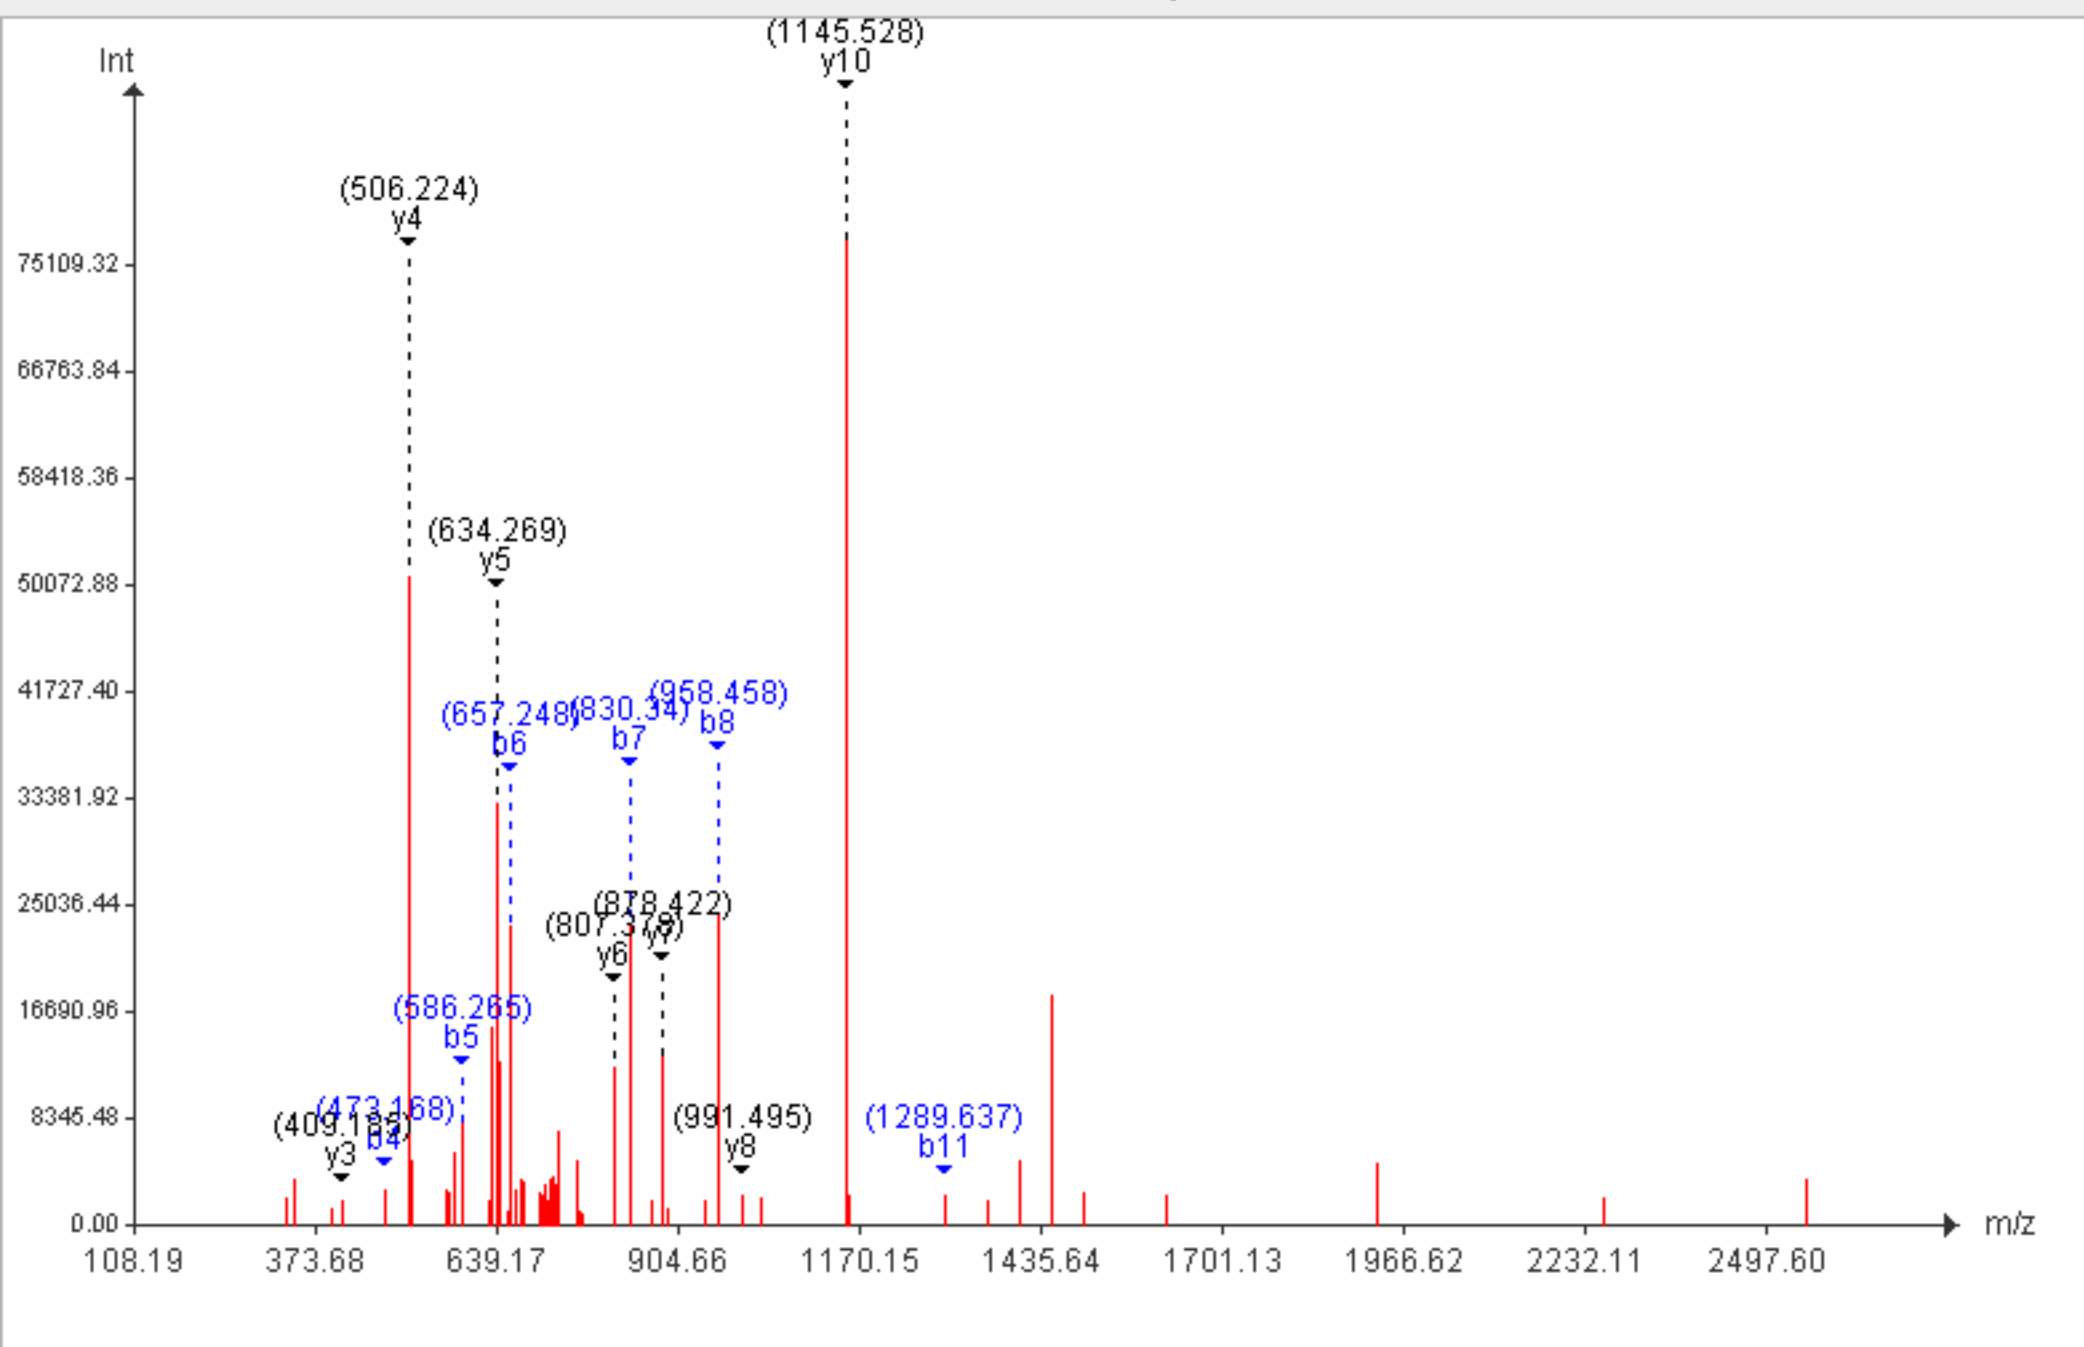

**AcD3-GEALSTLVLR-COOH**

**precursor mass: 609.2780 Da (charge: +2) protein: P63038 (280-290)**

**score (threshold): 47.0 (31.0)**

**instrument: Bruker Esquire HCT**

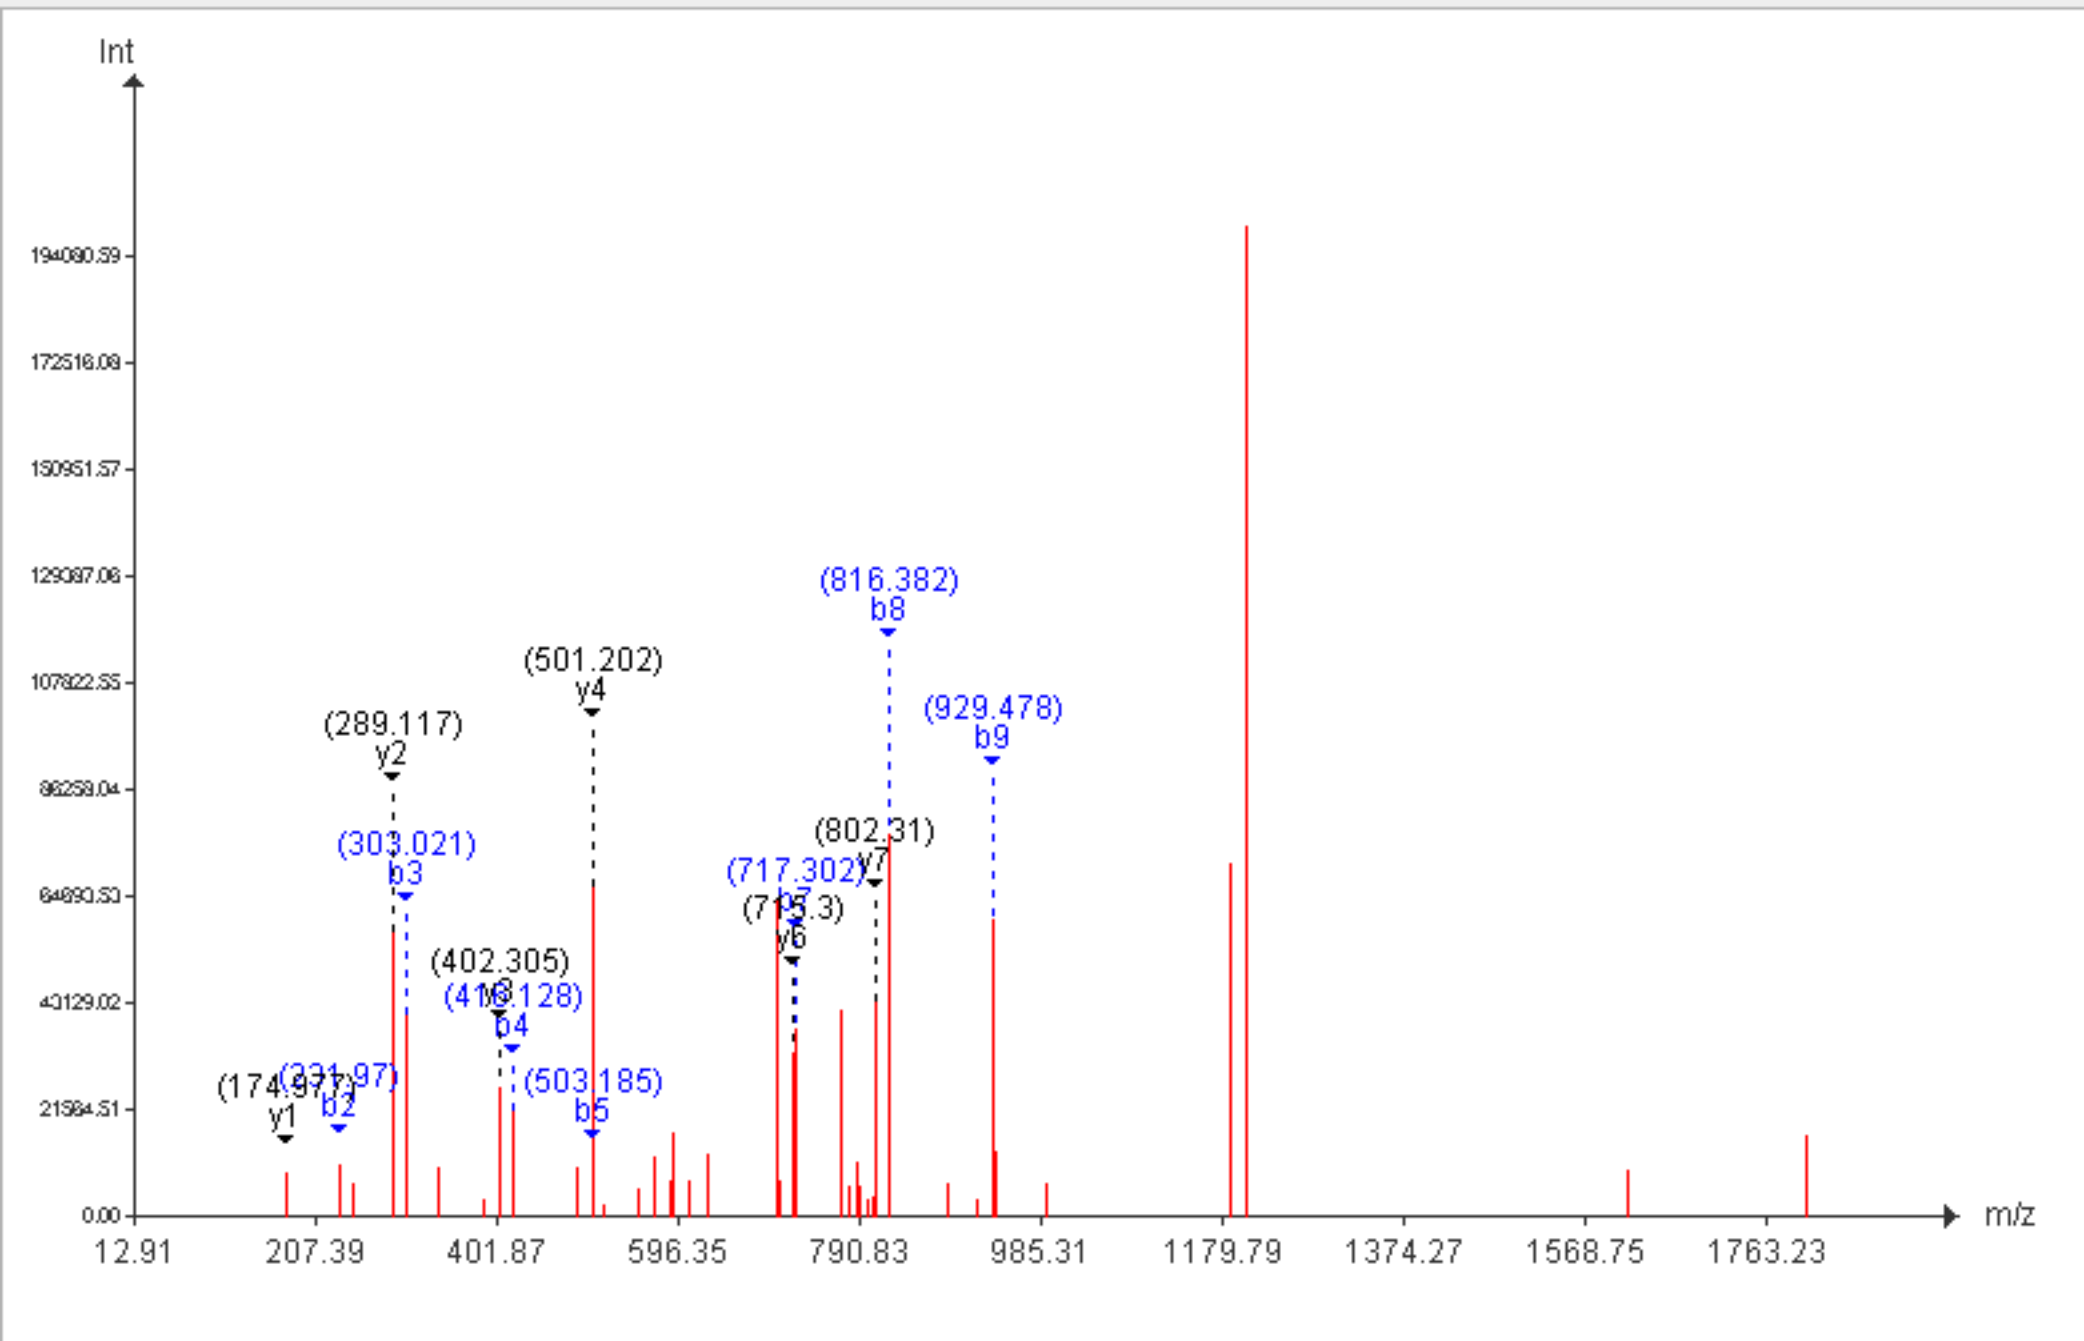

**AcD3-GEALSTLVLR(C13\*)-COOH**

**precursor mass: 612.3460 Da (charge: +2) protein: P63038 (280-290)**

**score (threshold): 62.0 (31.0)**

**instrument: Bruker Esquire HCT**

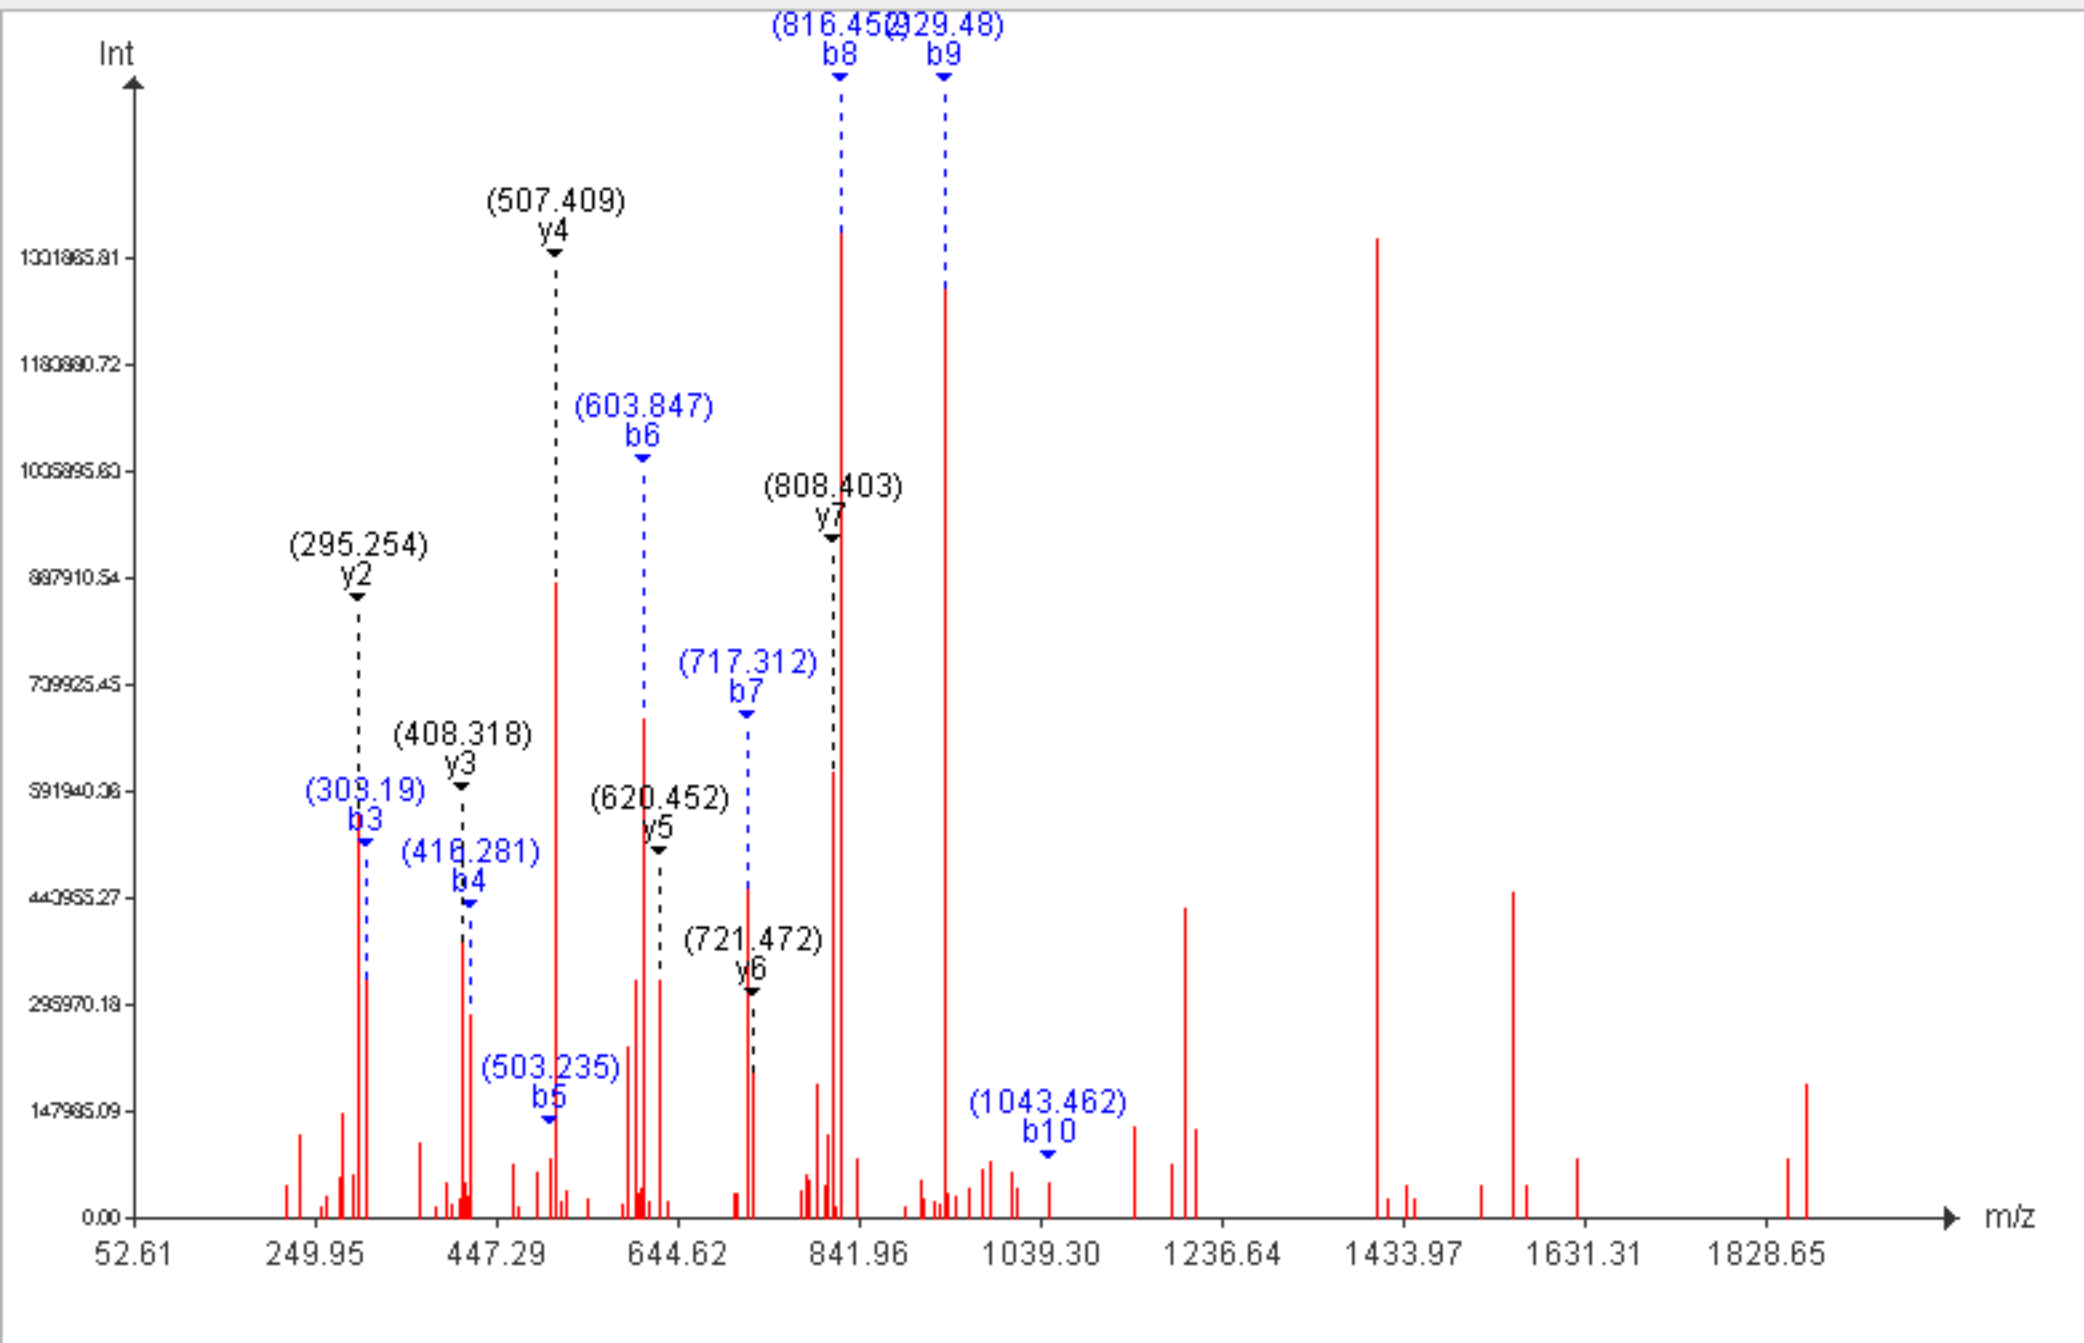

**AcD3-C(Cmm\*)LPGLAK(AcD3K\*)QPSFR-COOH**  
**precursor mass: 732.3780 Da (charge: +2) protein: P16675 (32-43)**  
**score (threshold): 32.0 (31.0)**  
**instrument: Bruker Esquire HCT**

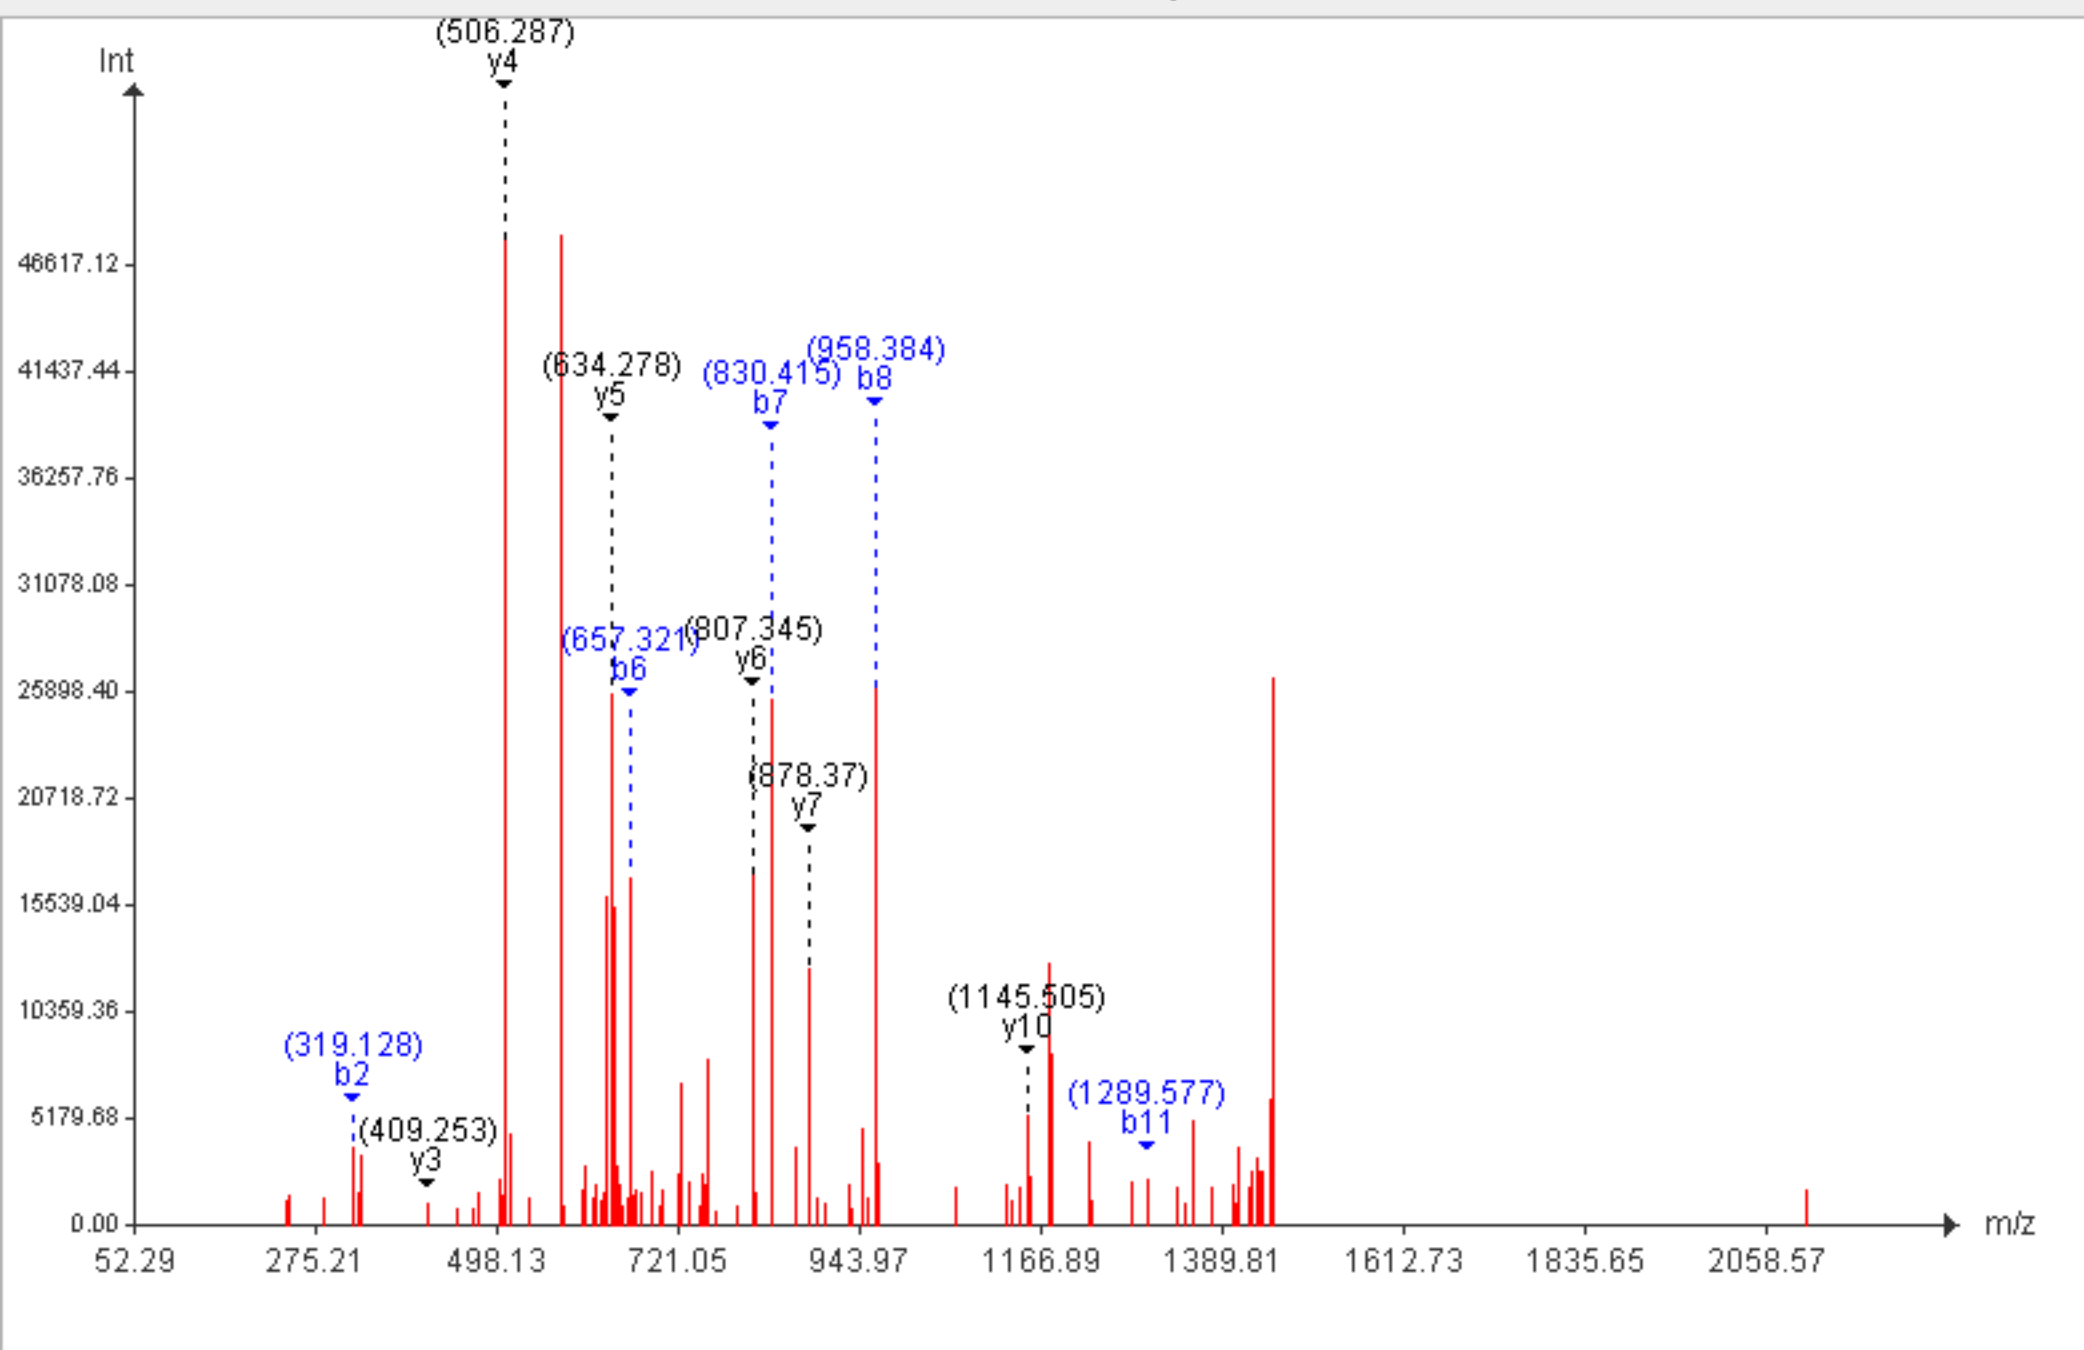

**AcD3-GEALSTLVLR(C13\*)-COOH**

**precursor mass: 612.2870 Da (charge: +2) protein: P63038 (280-290)**

**score (threshold): 41.0 (31.0)**

**instrument: Bruker Esquire HCT**

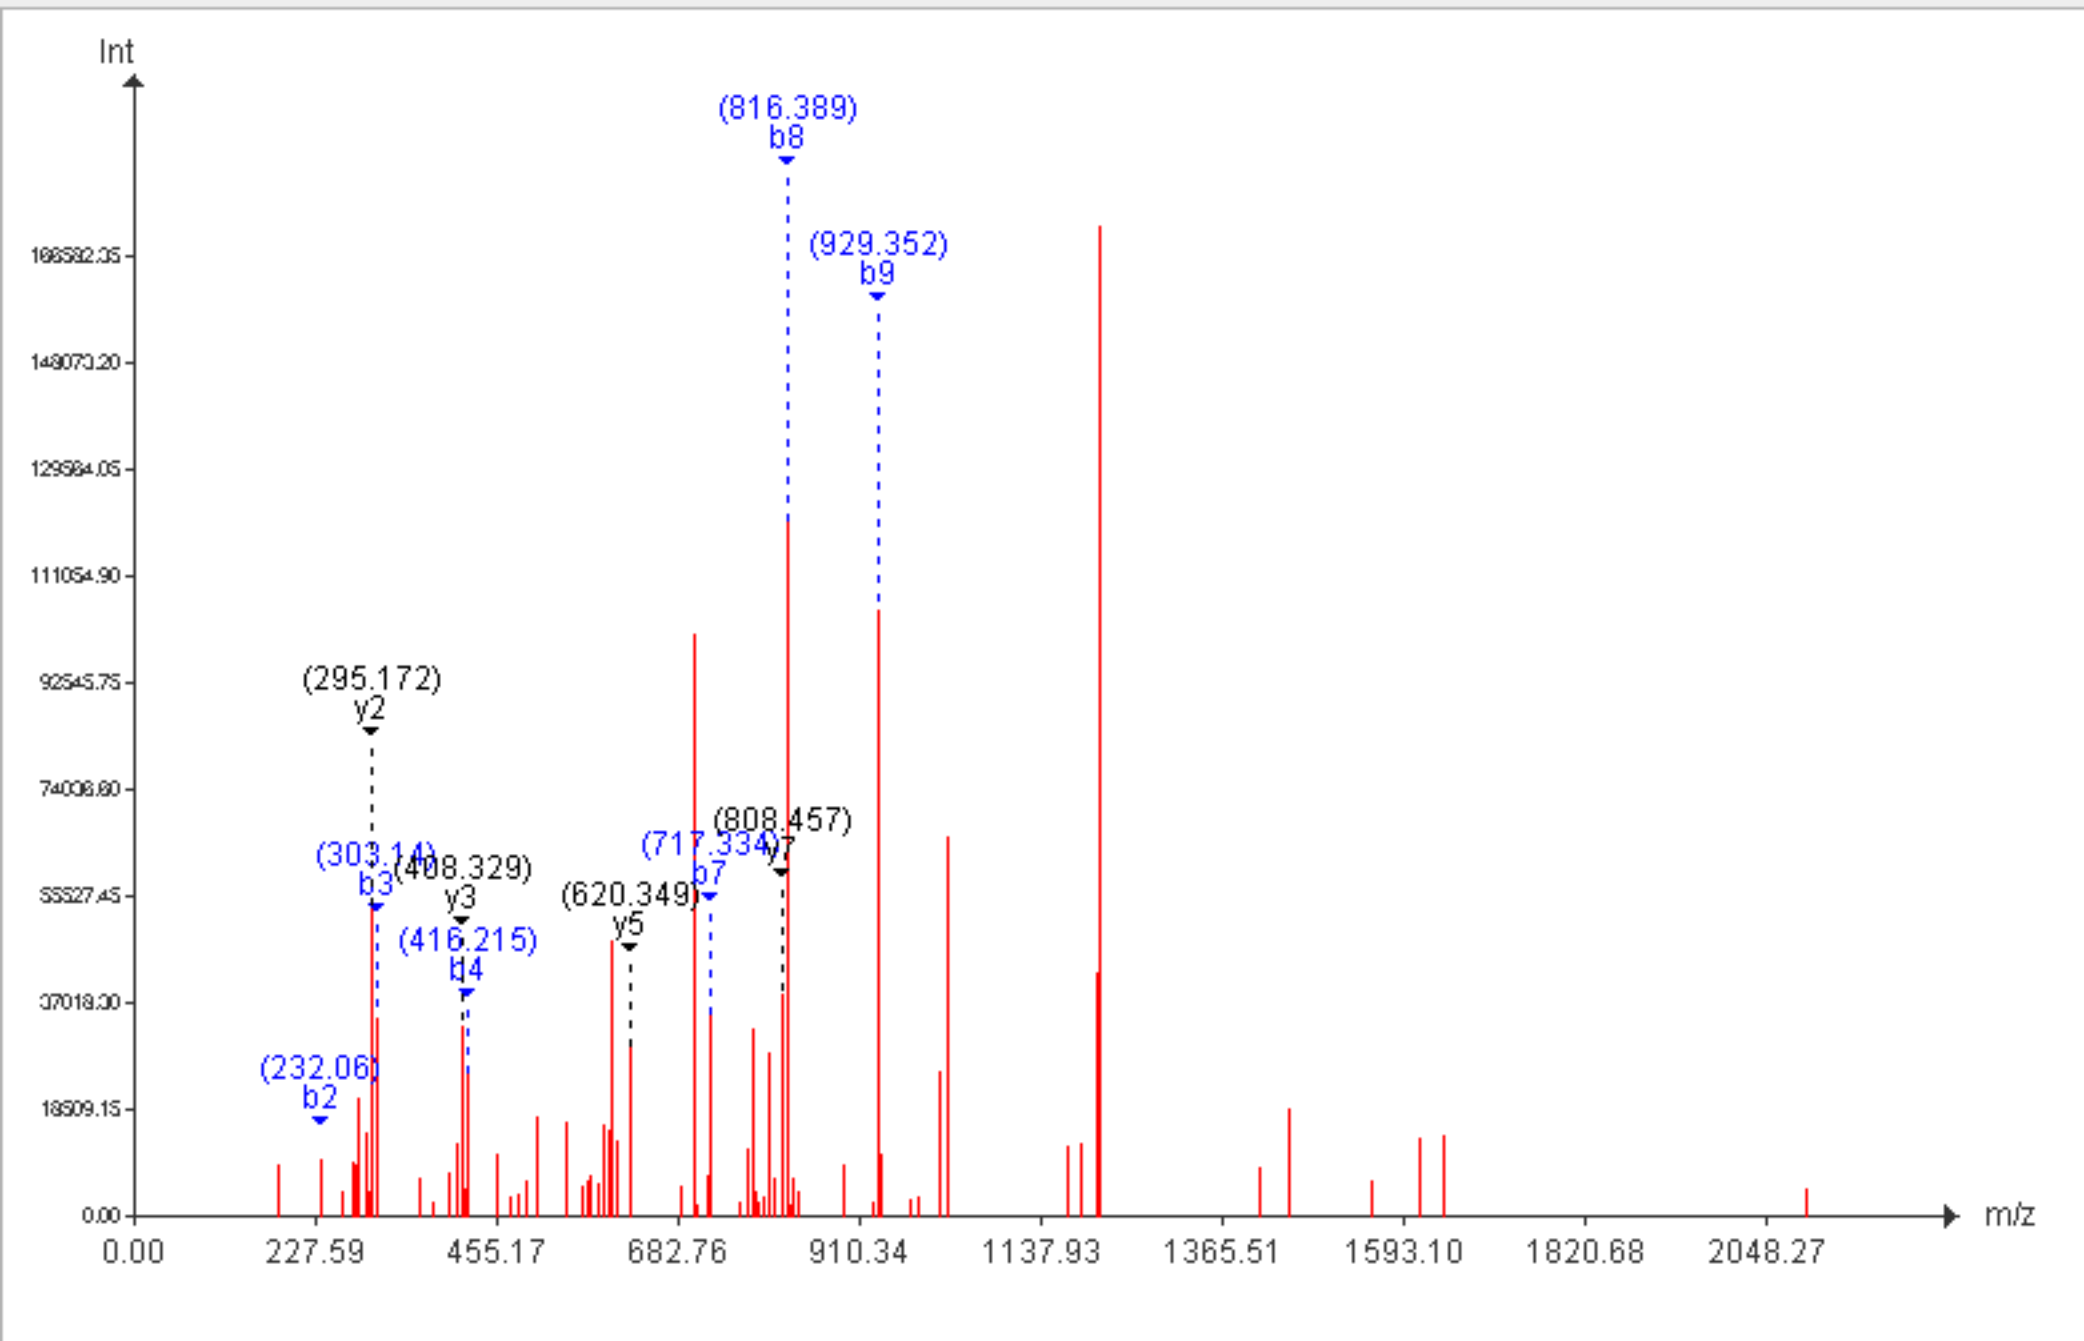



**AcD3-LFAIAK(AcD3K\*)DSQK(AcD3K\*)K(AcD3K\*)TQR-COOH**  
**precursor mass: 907.5300 Da (charge: +2) protein: IPI00456853.3 (665-678)**  
**score (threshold): 42.0 (35.0)**  
**instrument: Bruker Esquire HCT**

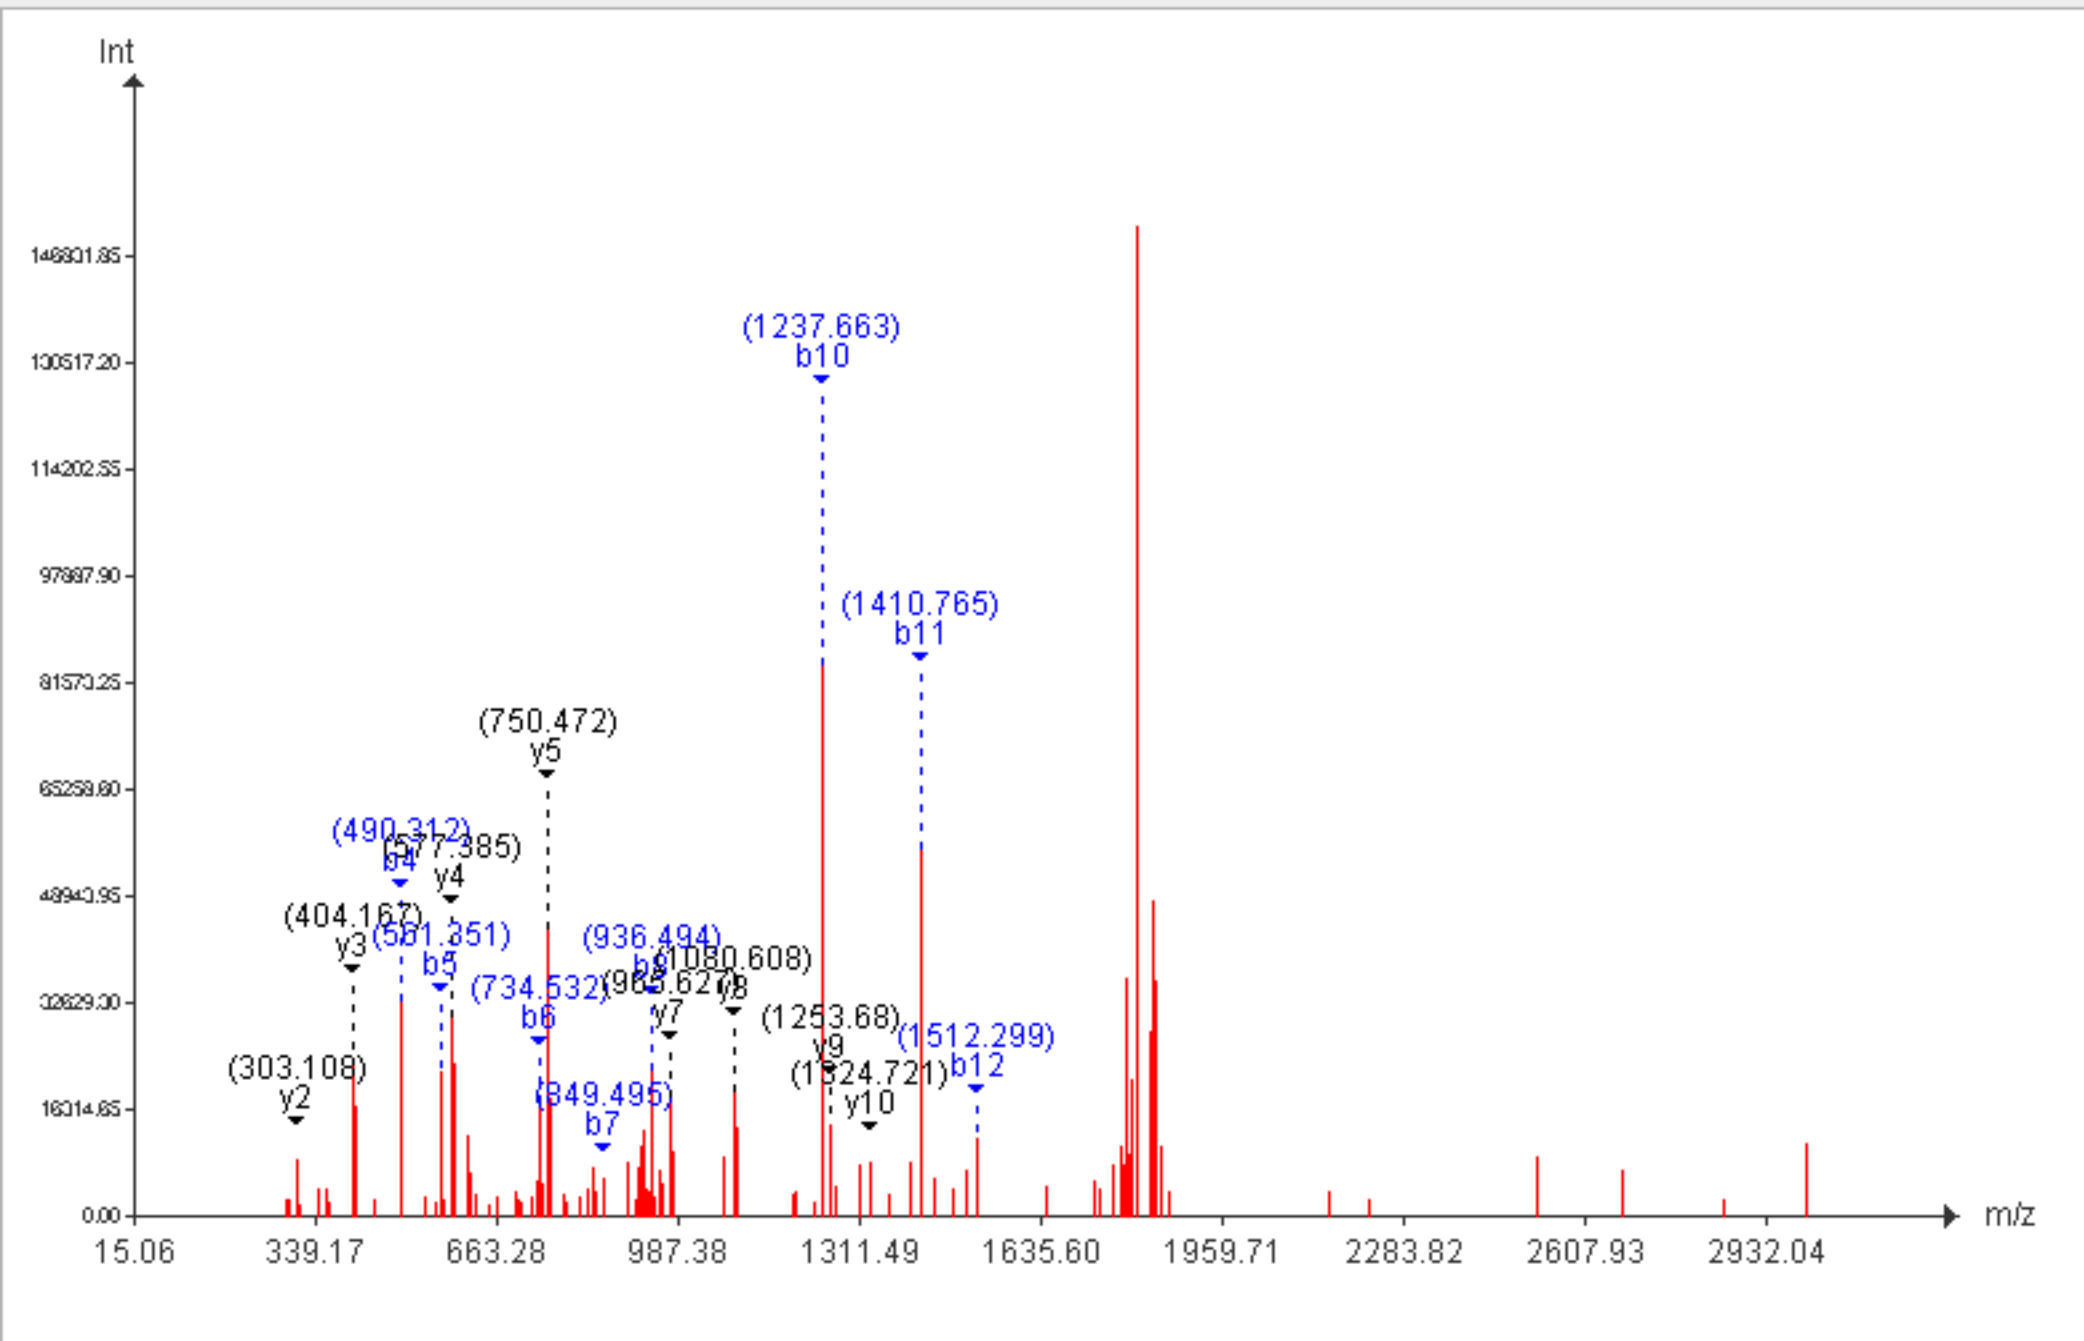

**AcD3-STLAVQQYIQQNIR(C13\*)-COOH**

**precursor mass: 856.9080 Da (charge: +2) protein: Q6PEB6 (35-48)**

**score (threshold): 36.0 (31.0)**

**instrument: Bruker Esquire HCT**

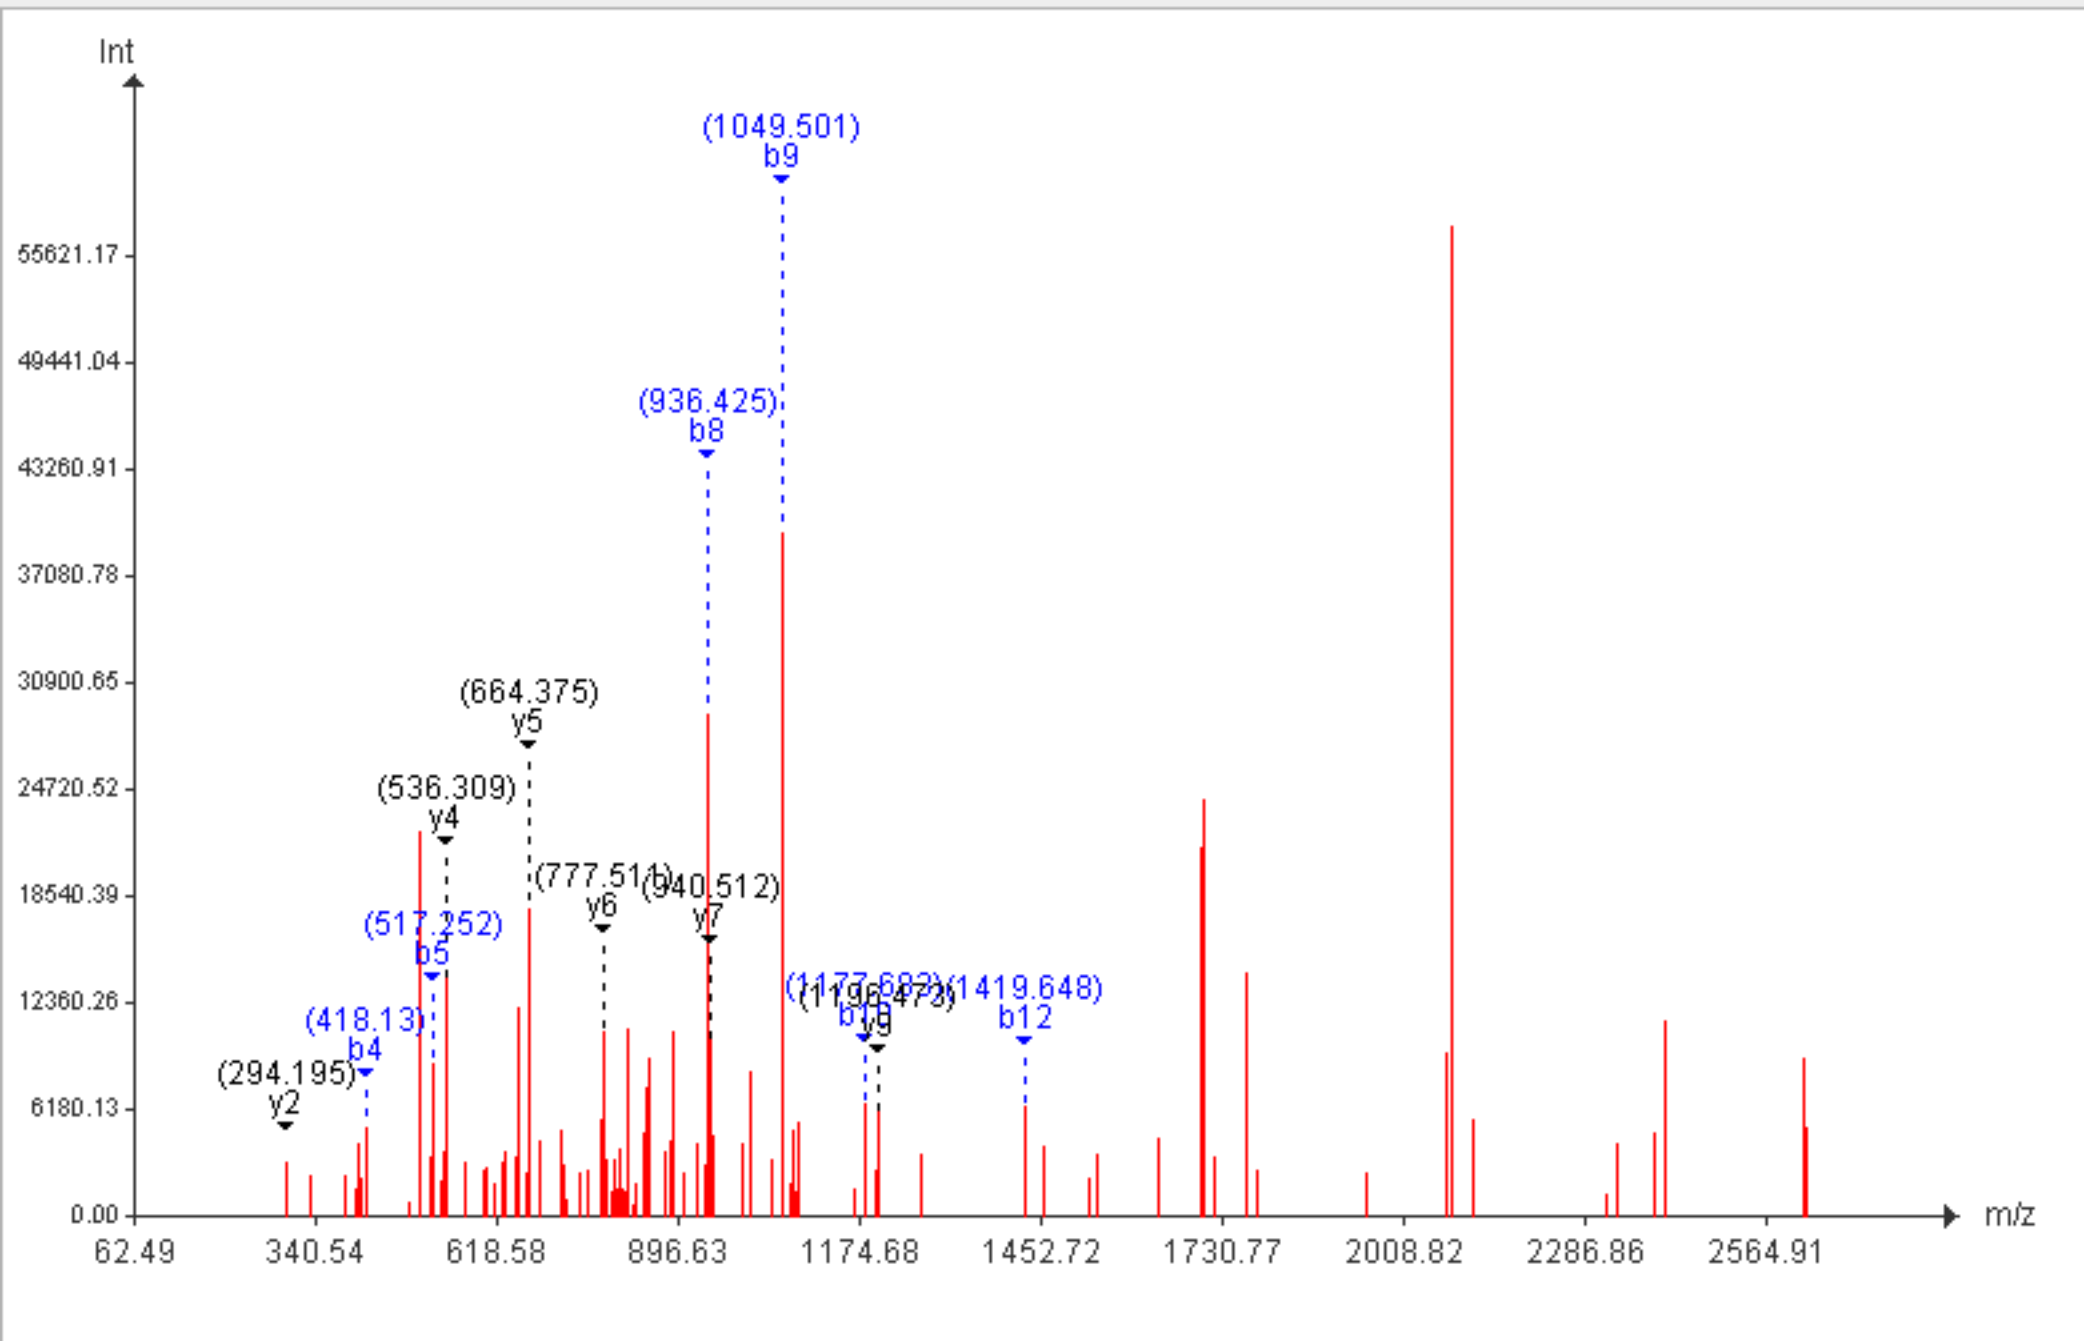

**AcD3-LFAIAK(AcD3K\*)DSQK(AcD3K\*)K(AcD3K\*)TQR-COOH**  
**precursor mass: 907.4660 Da (charge: +2) protein: IPI00456853.3 (665-678)**  
**score (threshold): 69.0 (35.0)**  
**instrument: Bruker Esquire HCT**

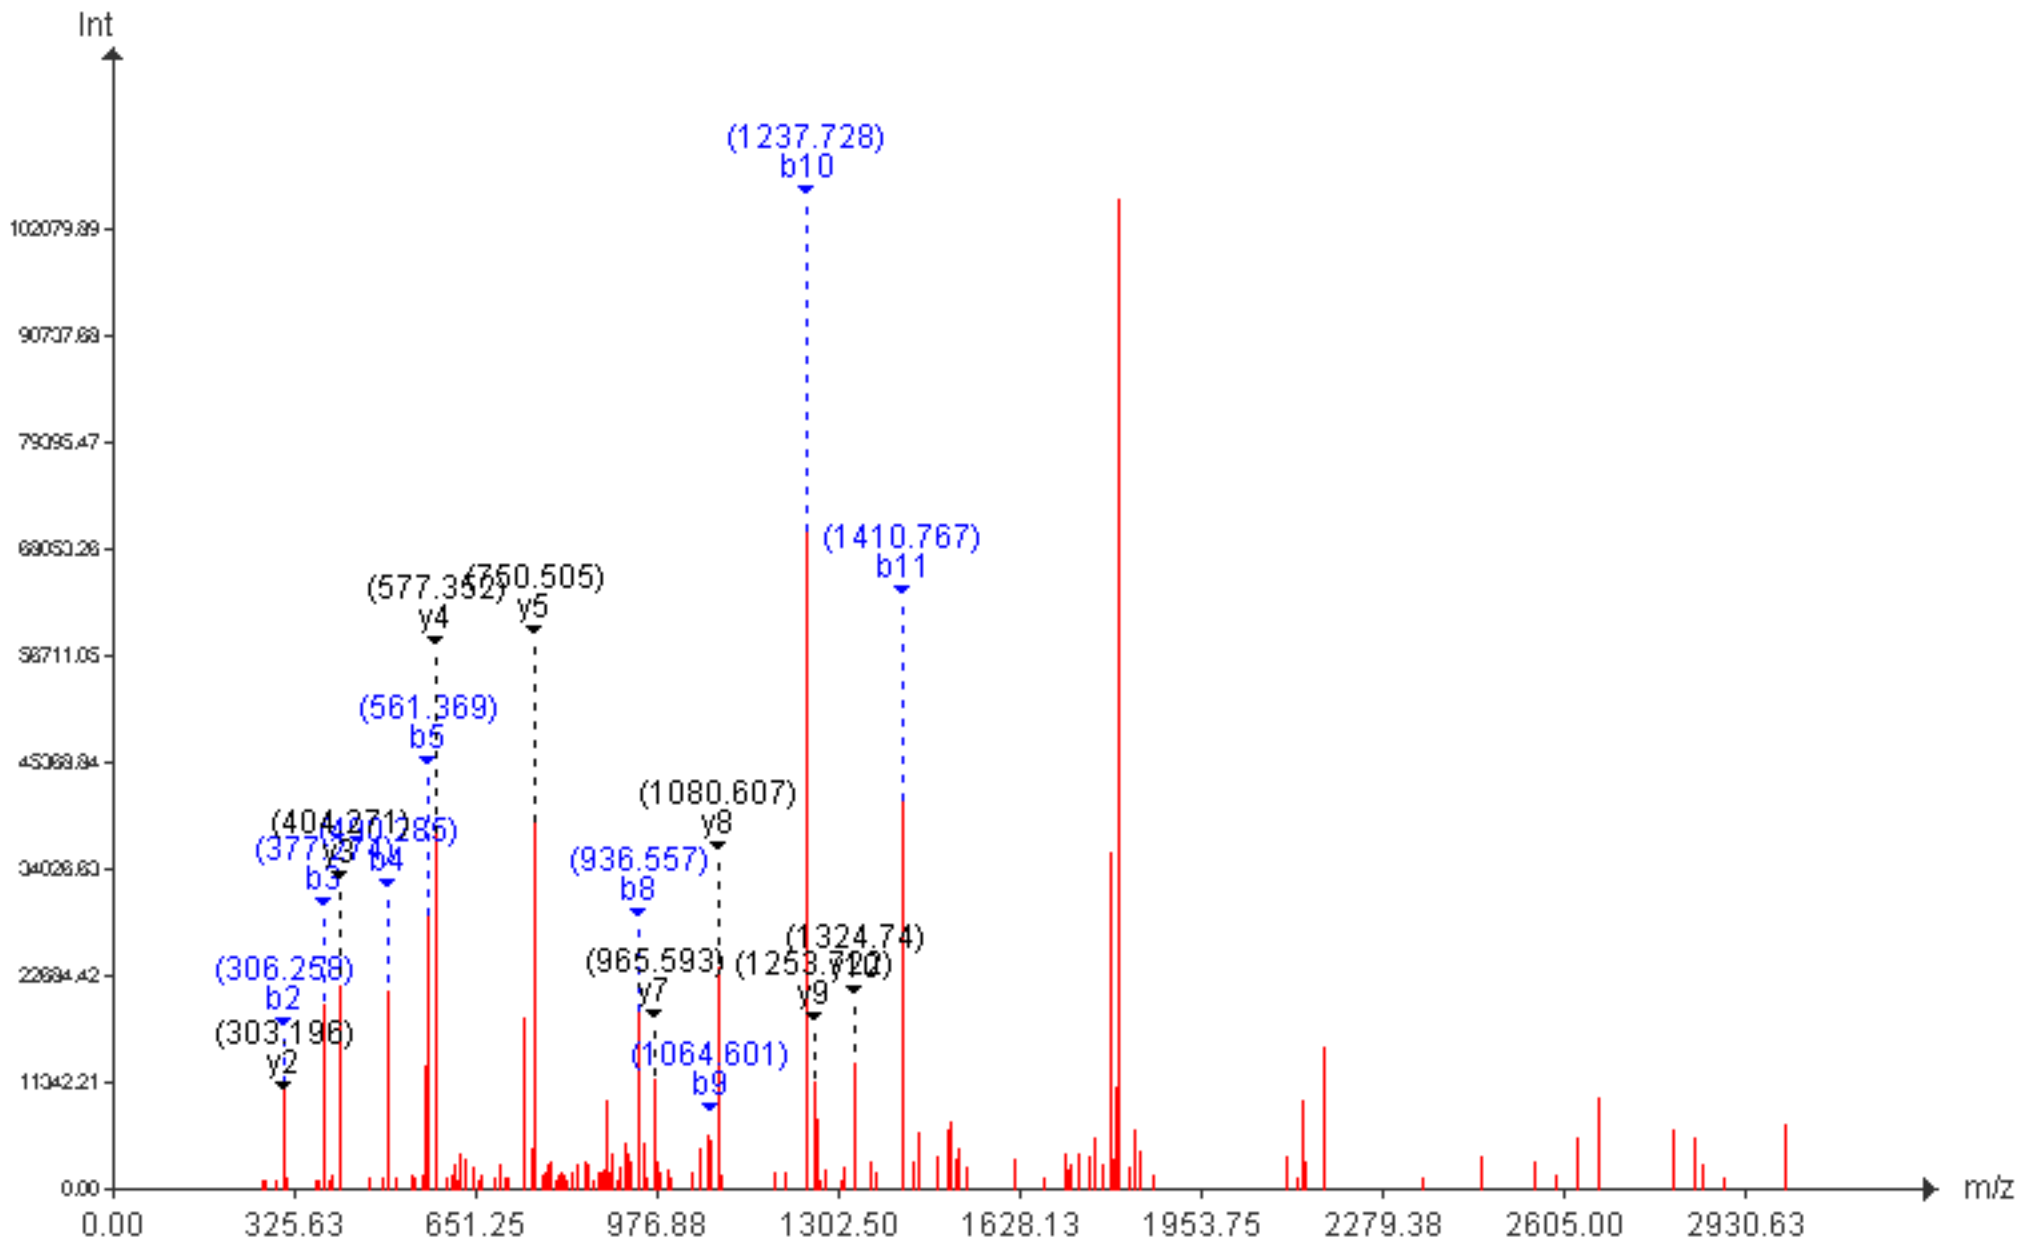

**AcD3-LFAIAK(AcD3K\*)DSQK(AcD3K\*)K(AcD3K\*)TQR-COOH**  
**precursor mass: 907.4930 Da (charge: +2) protein: IPI00456853.3 (665-678)**  
**score (threshold): 64.0 (35.0)**  
**instrument: Bruker Esquire HCT**

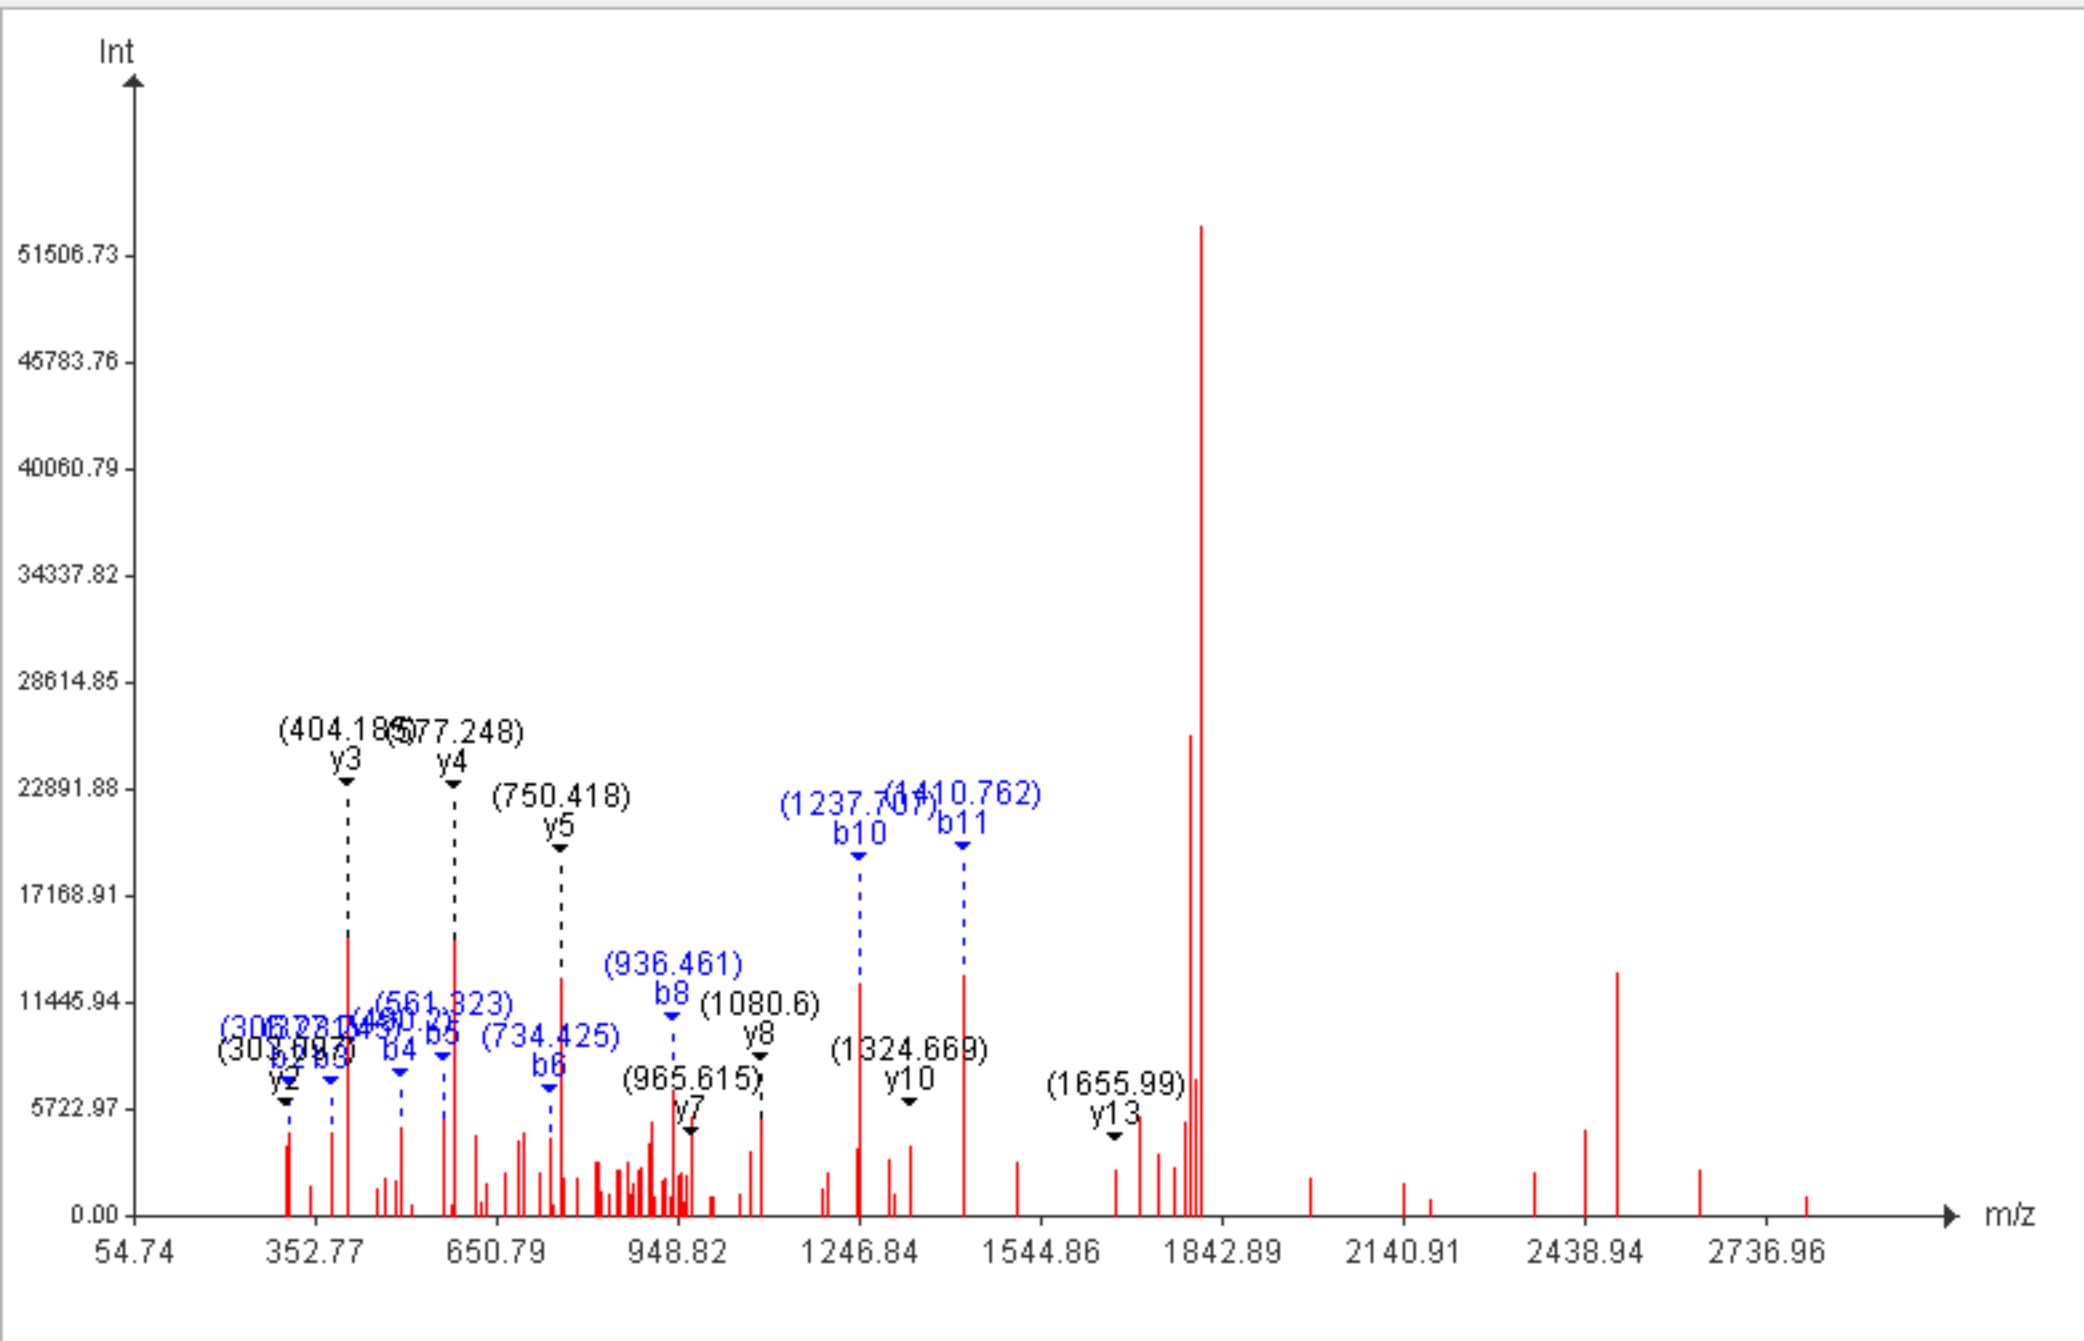

**AcD3-FAVEYFTR(C13\*)-COOH**

**precursor mass: 542.2640 Da (charge: +2) protein: P12367 (30-37)**

**score (threshold): 47.0 (31.0)**

**instrument: Bruker Esquire HCT**

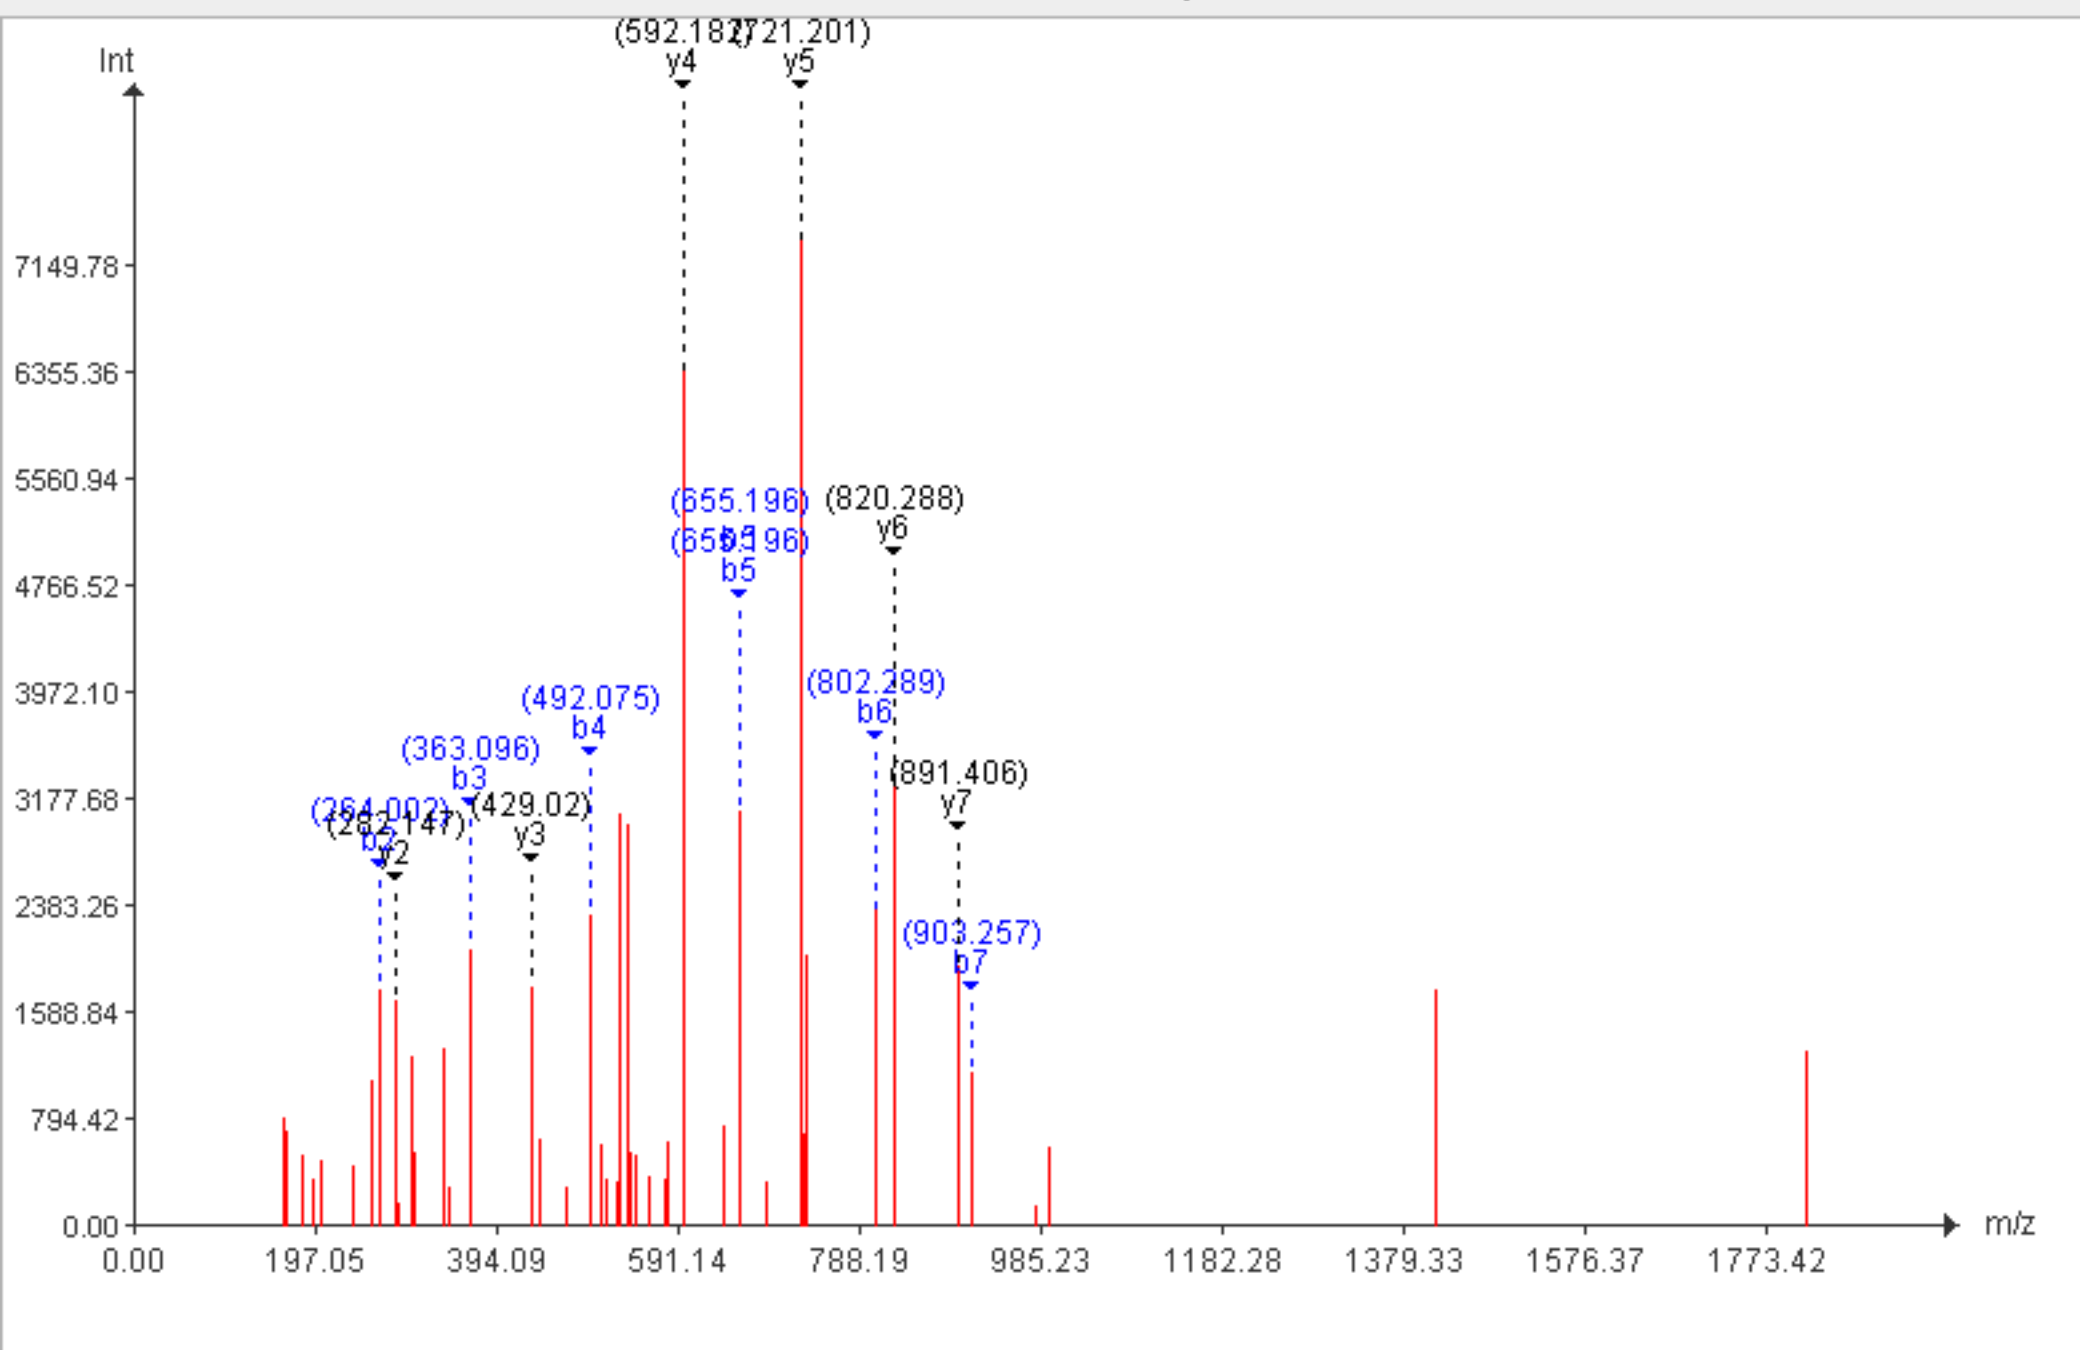

**AcD3-GQPGAFTC(Cmm\*)YLDAGLAR-COOH**

**precursor mass: 871.3510 Da (charge: +2) protein: P47962 (136-151)**

**score (threshold): 71.0 (31.0)**

**instrument: Bruker Esquire HCT**

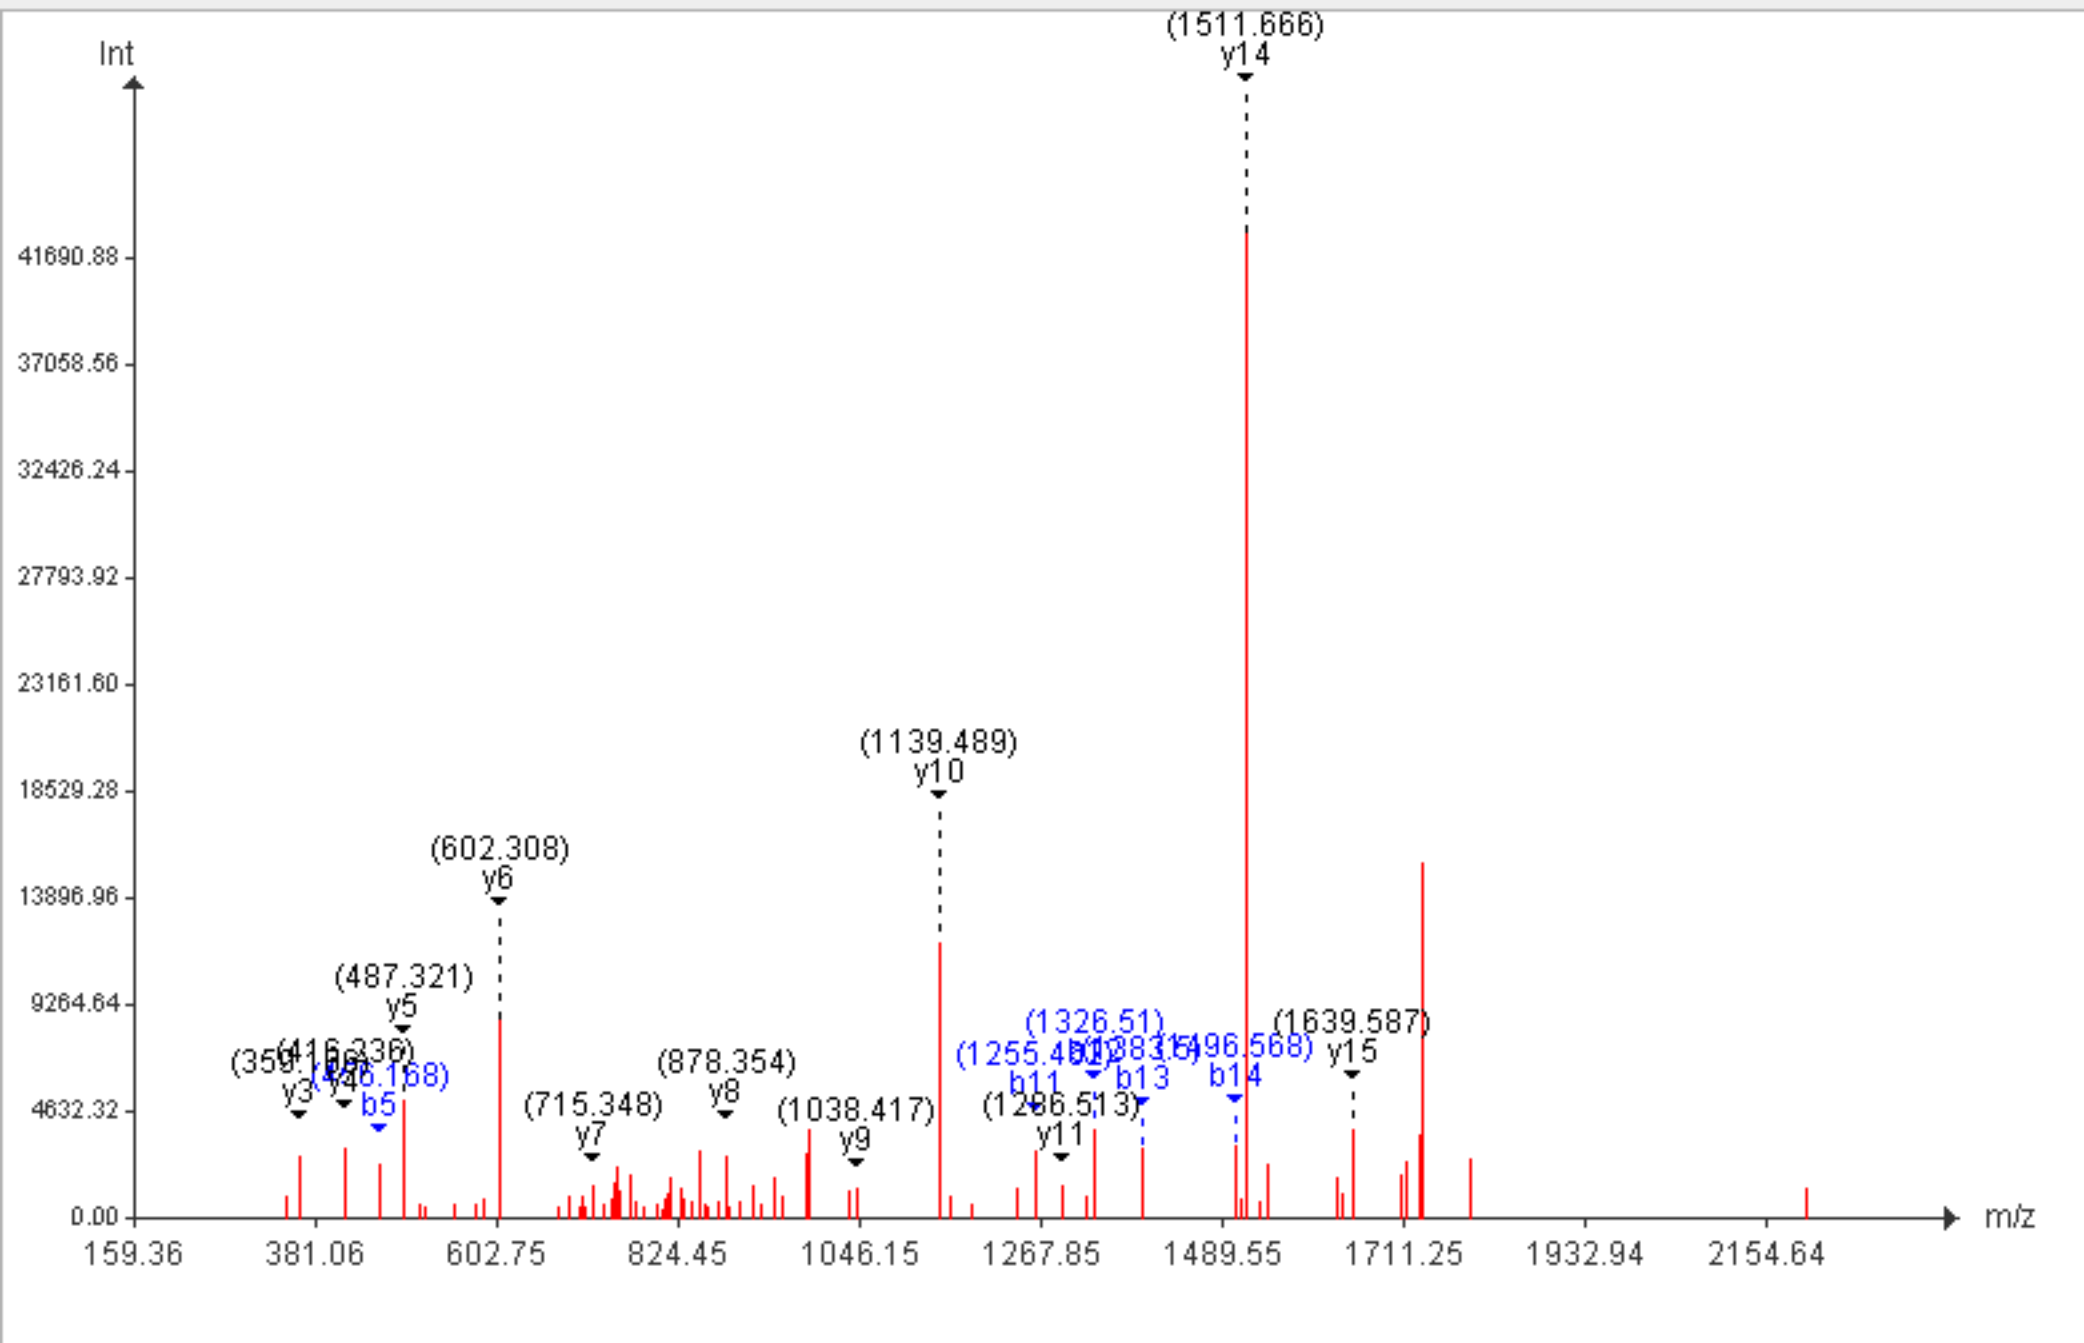

**AcD3-SLK(AcD3K\*)EALTYDGALLGDR(C13\*)-COOH**  
precursor mass: 909.4680 Da (charge: +2) protein: Q9WUK2 (93-108)  
score (threshold): 58.0 (31.0)  
instrument: Bruker Esquire HCT

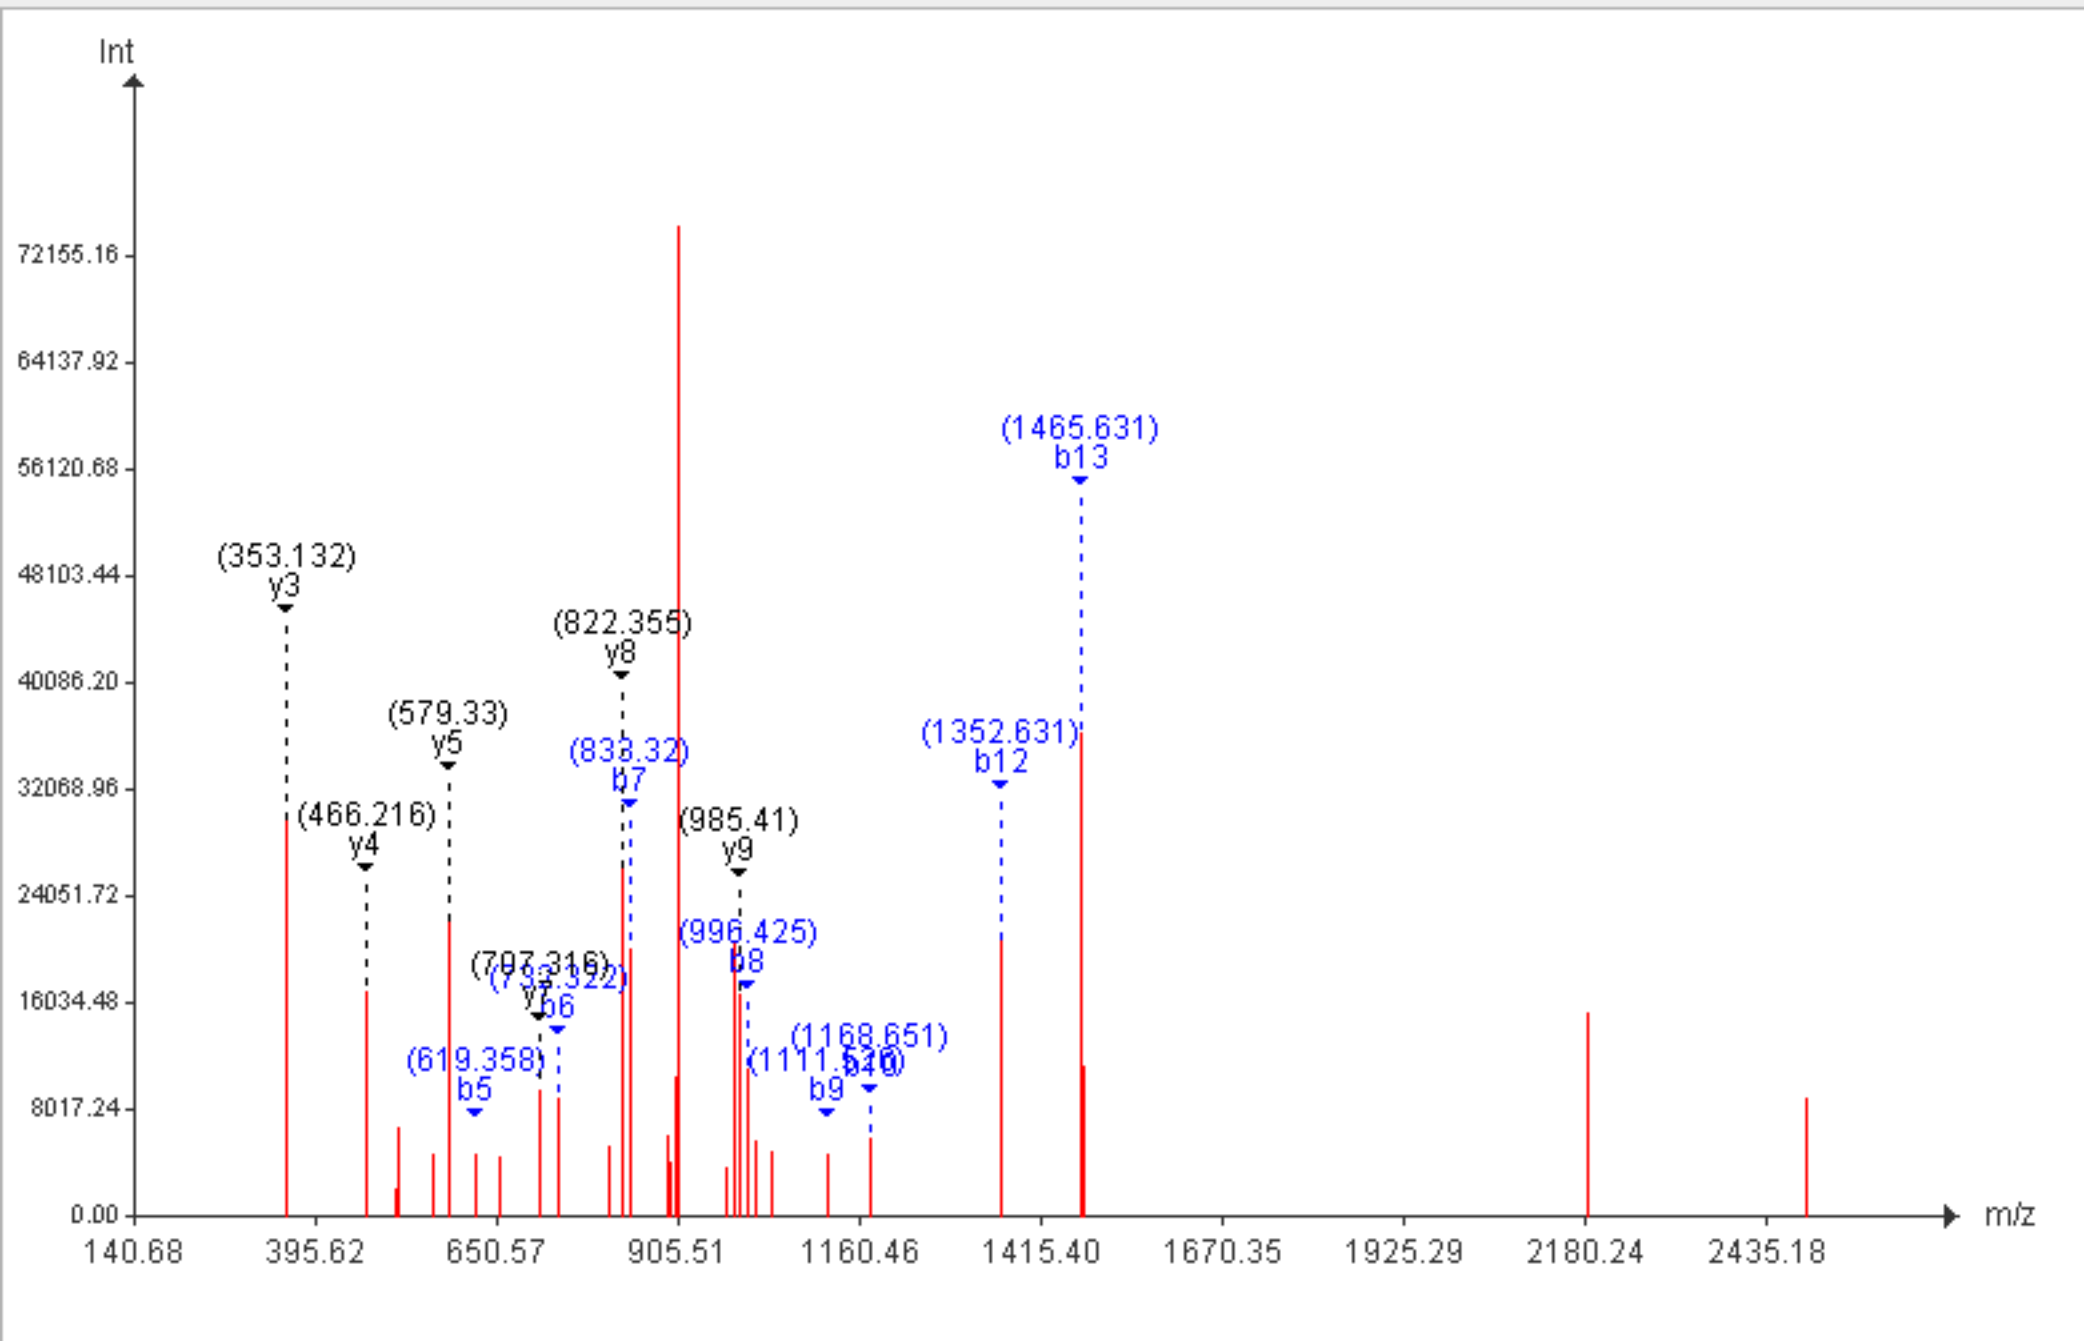

***AcD3-GK(AcD3K\*)VESIM(Mox)K(AcD3K\*)R(C13\*)-COOH***  
**precursor mass: 602.8250 Da (charge: +2) protein: IPI00007682.2 (300-308)**  
**score (threshold): 55.0 (34.0)**  
**instrument: Bruker Esquire HCT**

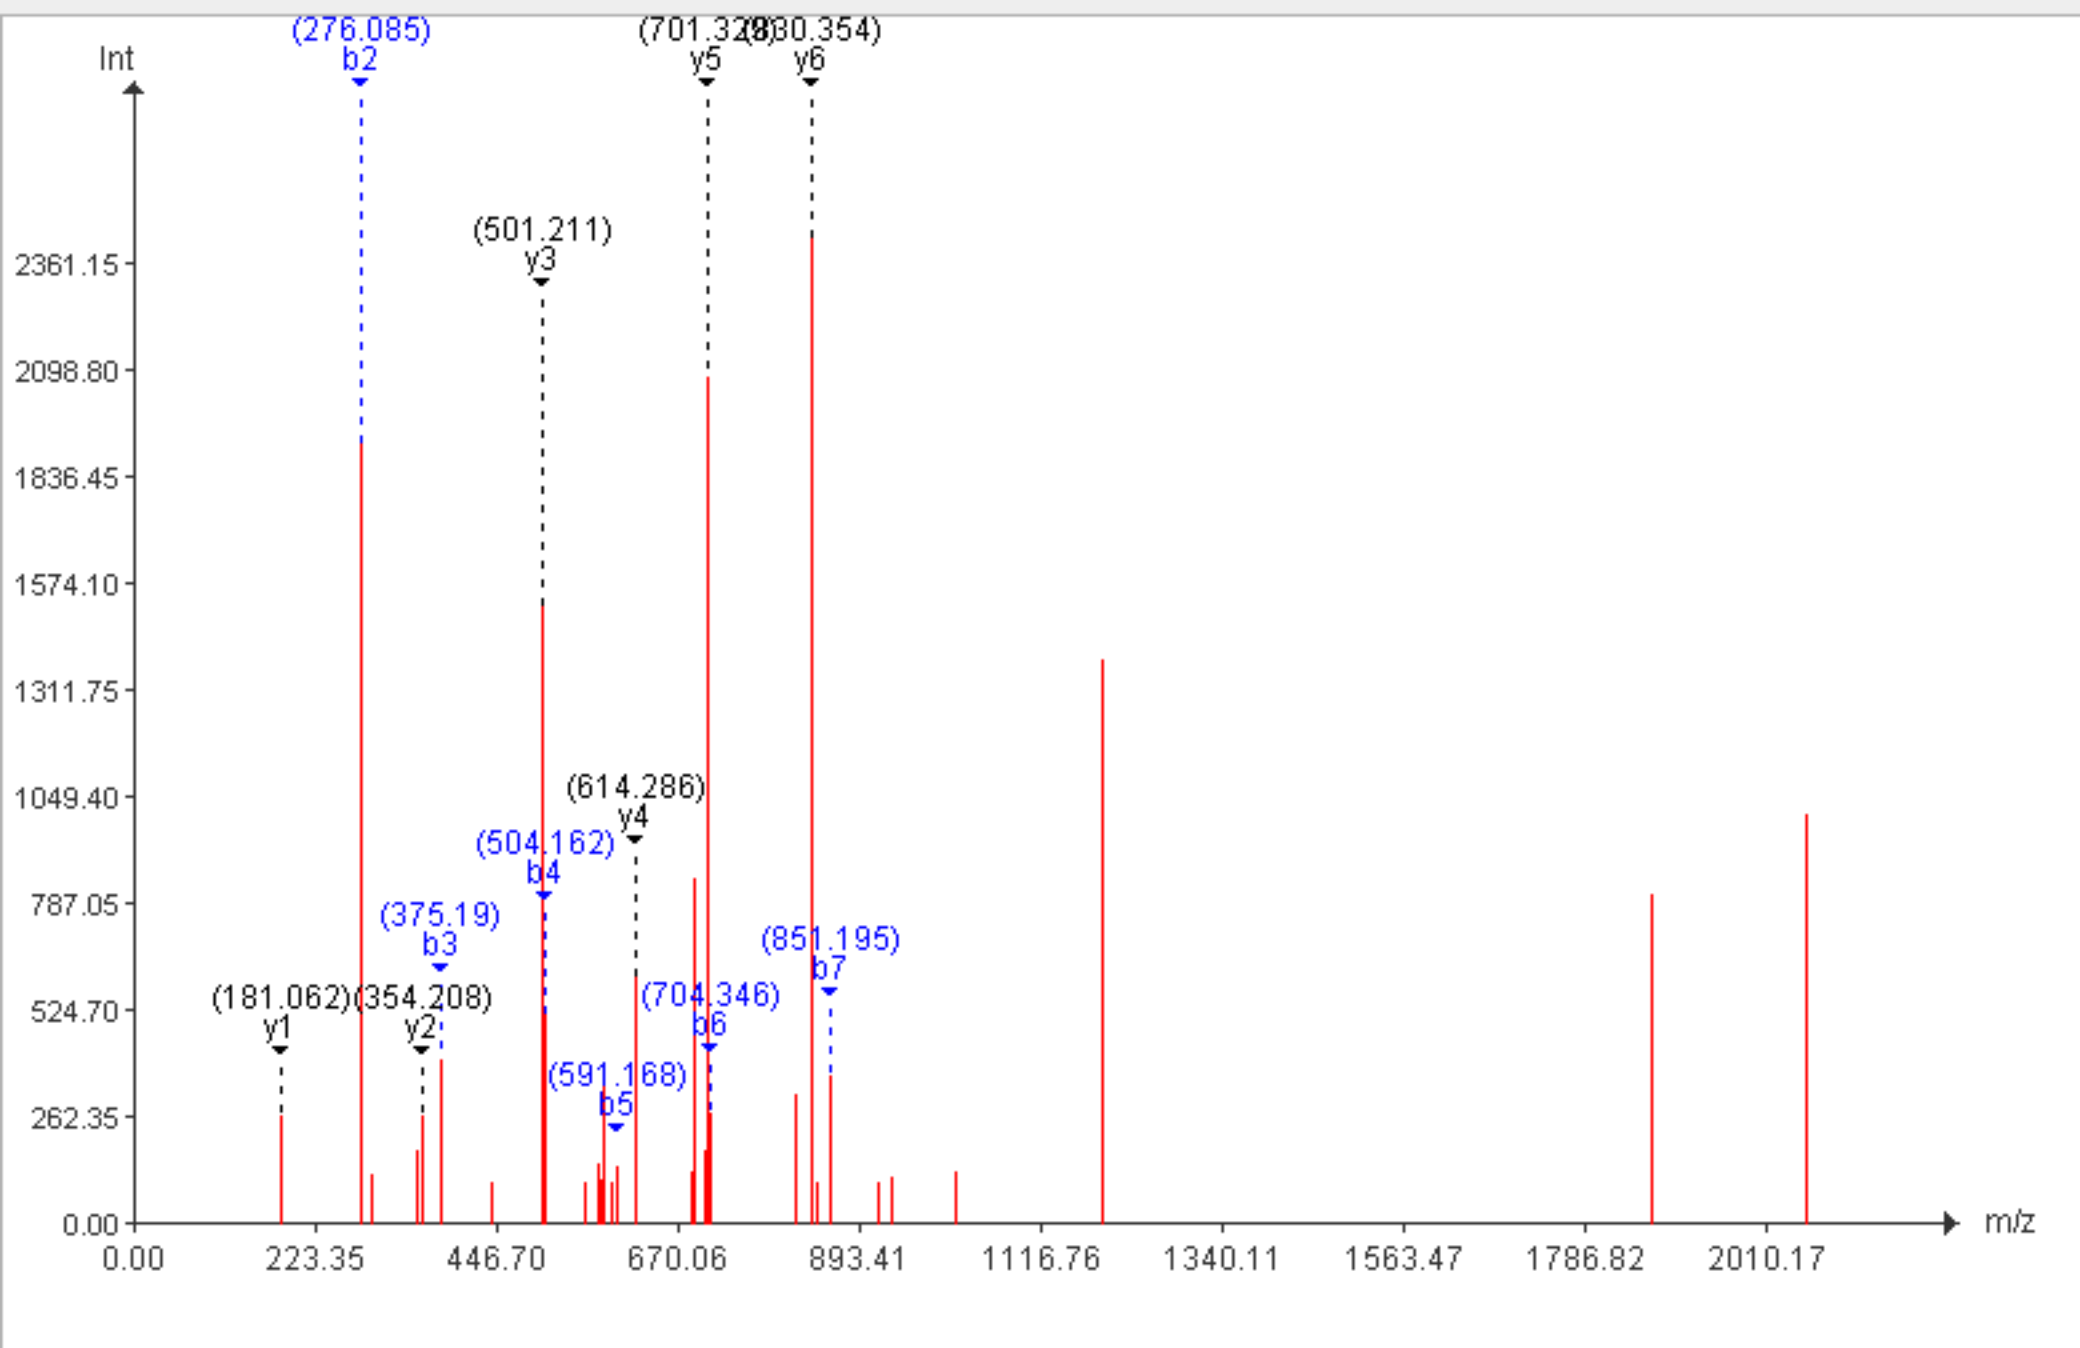



**AcD3-VDGTVEEDLGK(AcD3K\*)SR(C13\*)-COOH**  
**precursor mass: 750.9060 Da (charge: +2) protein: P08113 (27-39)**  
**score (threshold): 41.0 (31.0)**  
**instrument: Bruker Esquire HCT**

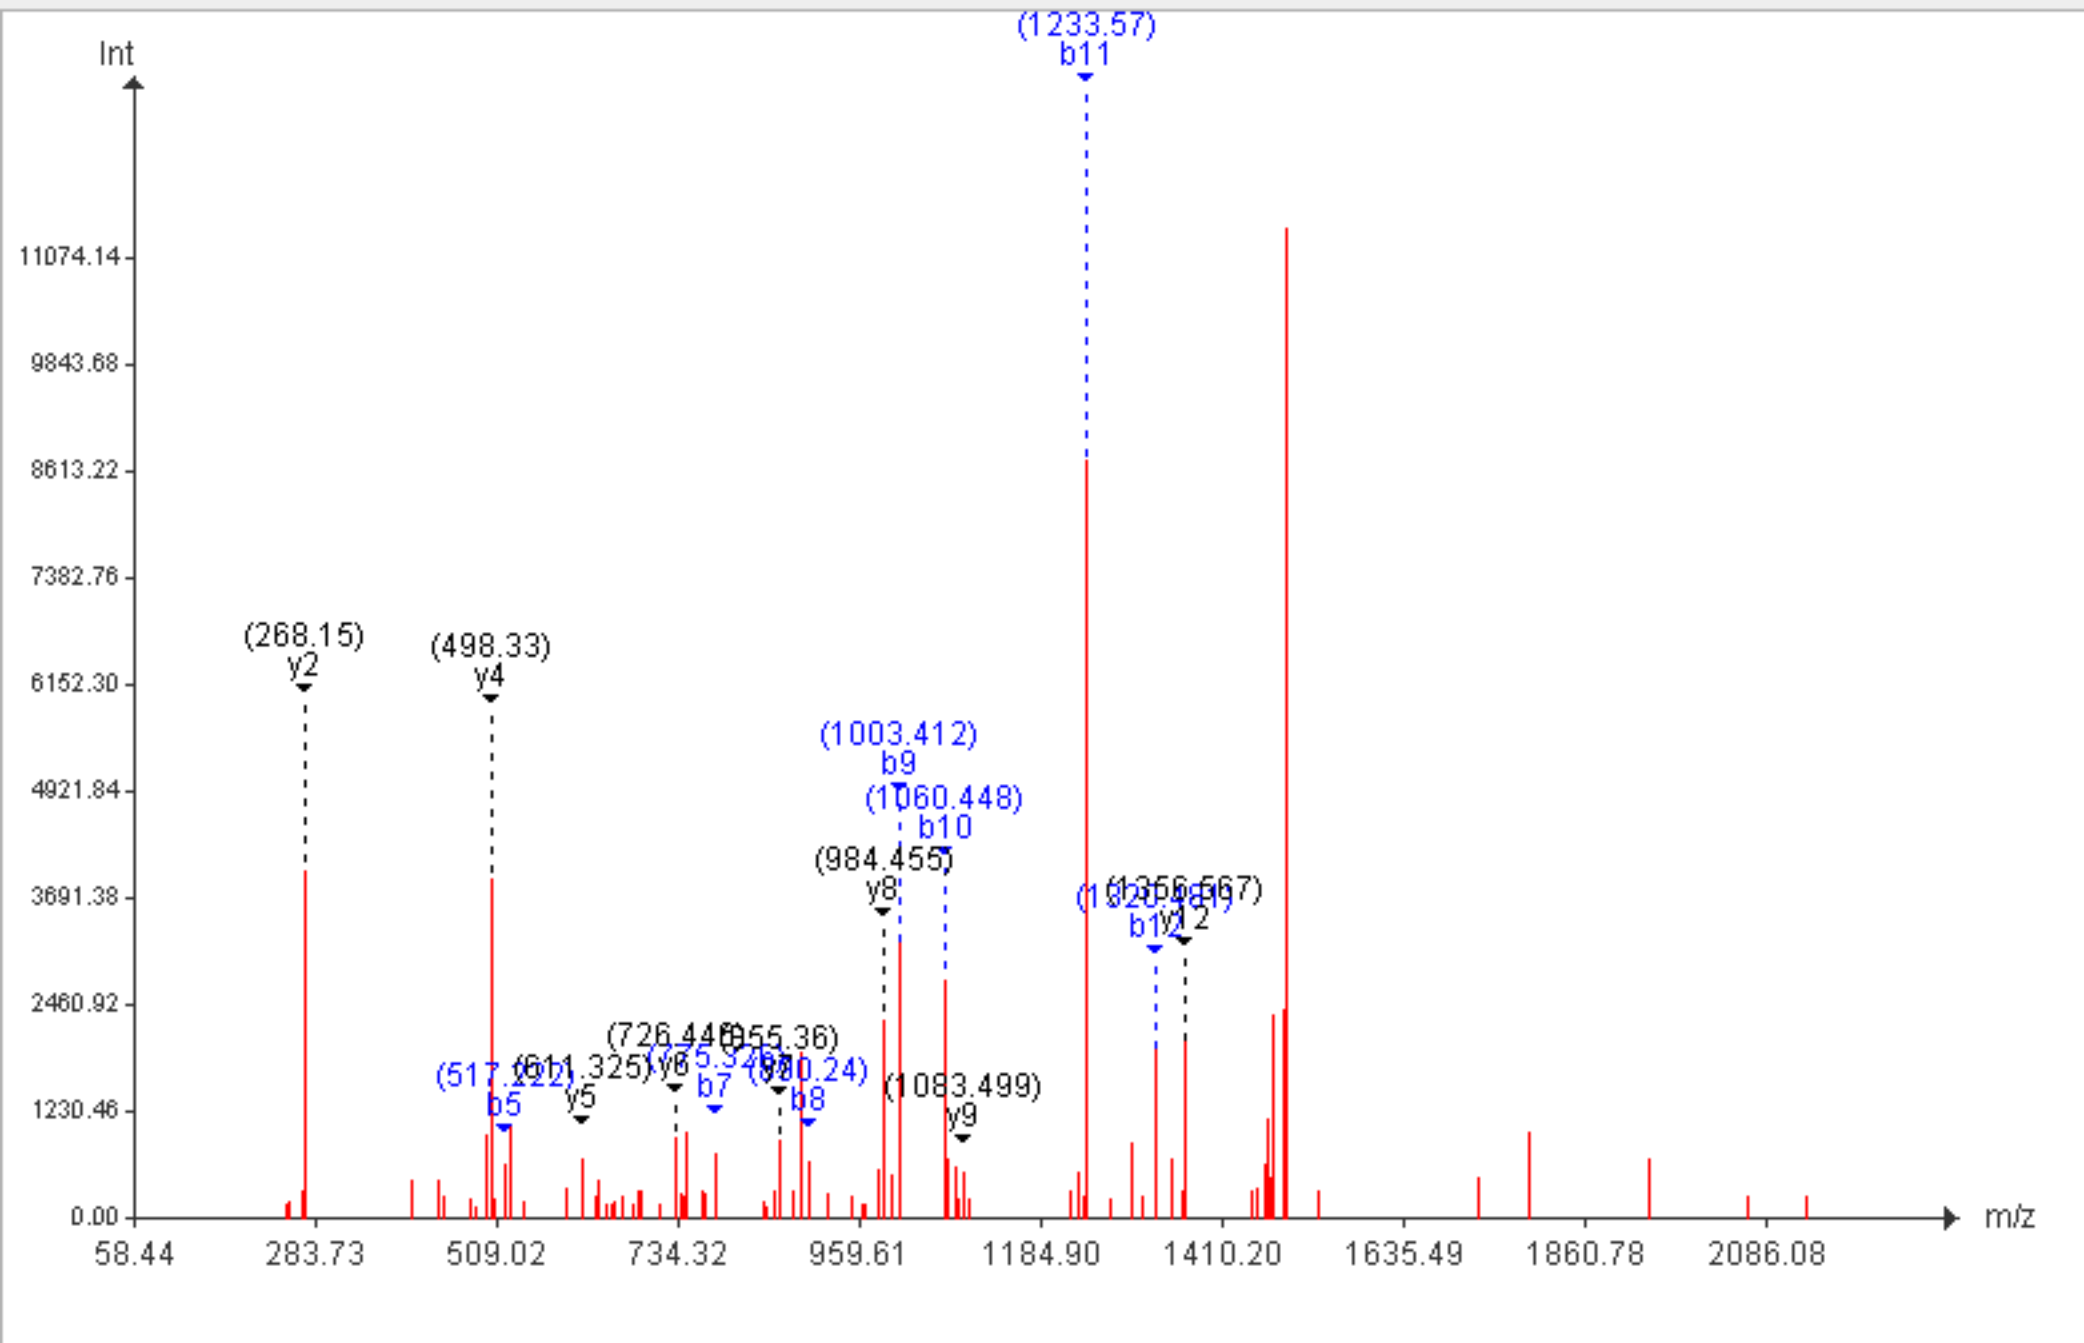

**AcD3-ASSAVK(AcD3K\*)VK(AcD3K\*)R-COOH**  
**precursor mass: 540.7580 Da (charge: +2) protein: Q921F2 (90-98)**  
**score (threshold): 55.0 (31.0)**  
**instrument: Bruker Esquire HCT**

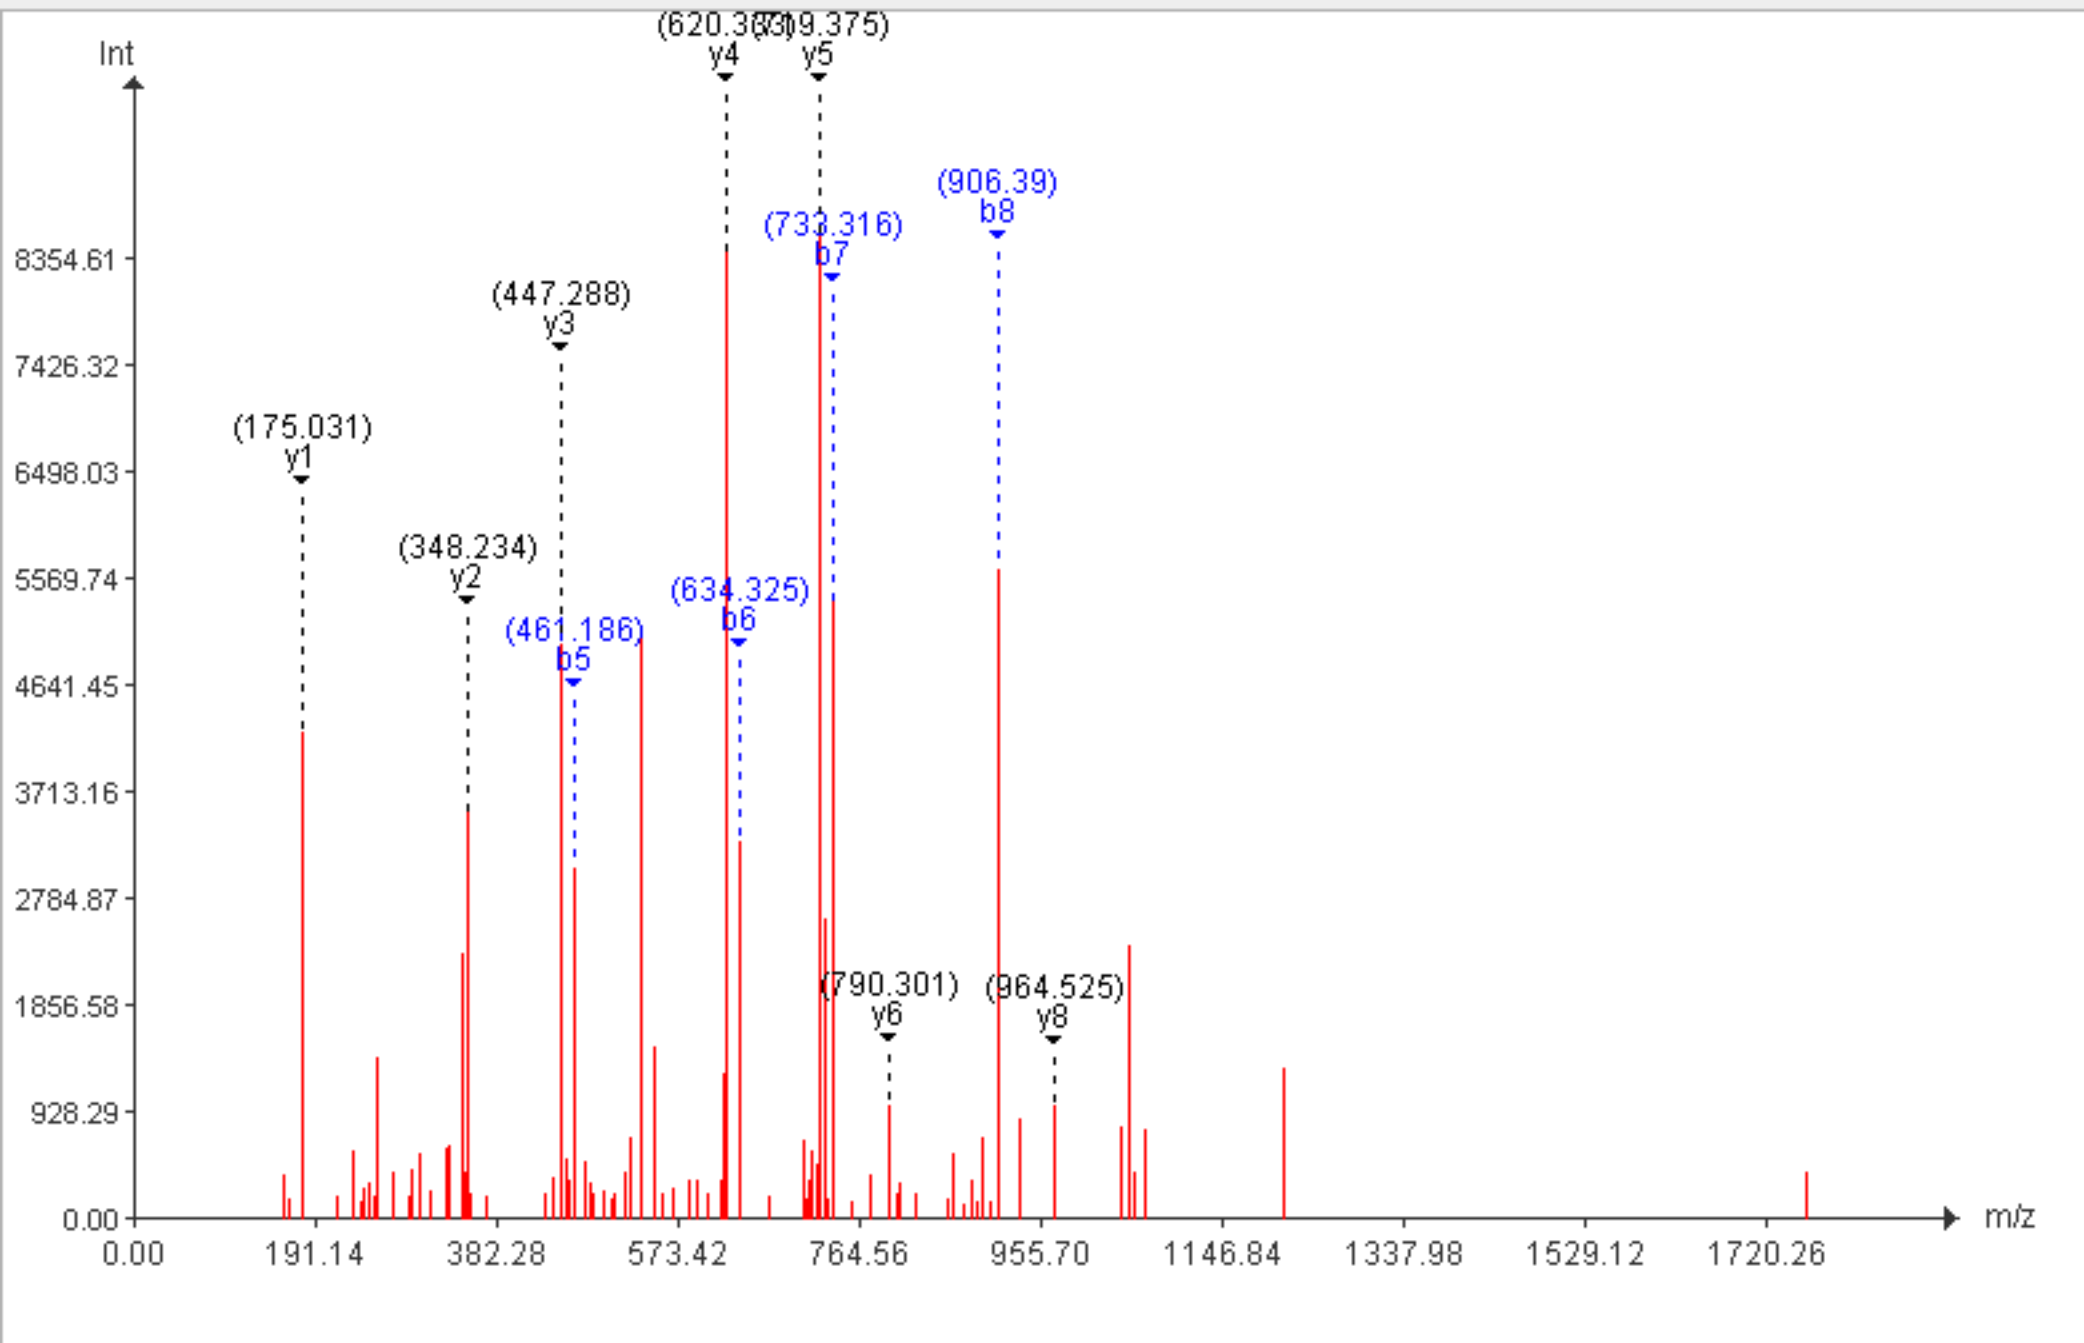

**AcD3-AGM(Mox)AM(Mox)AGQSPVLR(C13\*)-COOH**  
precursor mass: 686.2960 Da (charge: +2) protein: P17225 (172-184)  
score (threshold): 34.0 (31.0)  
instrument: Bruker Esquire HCT

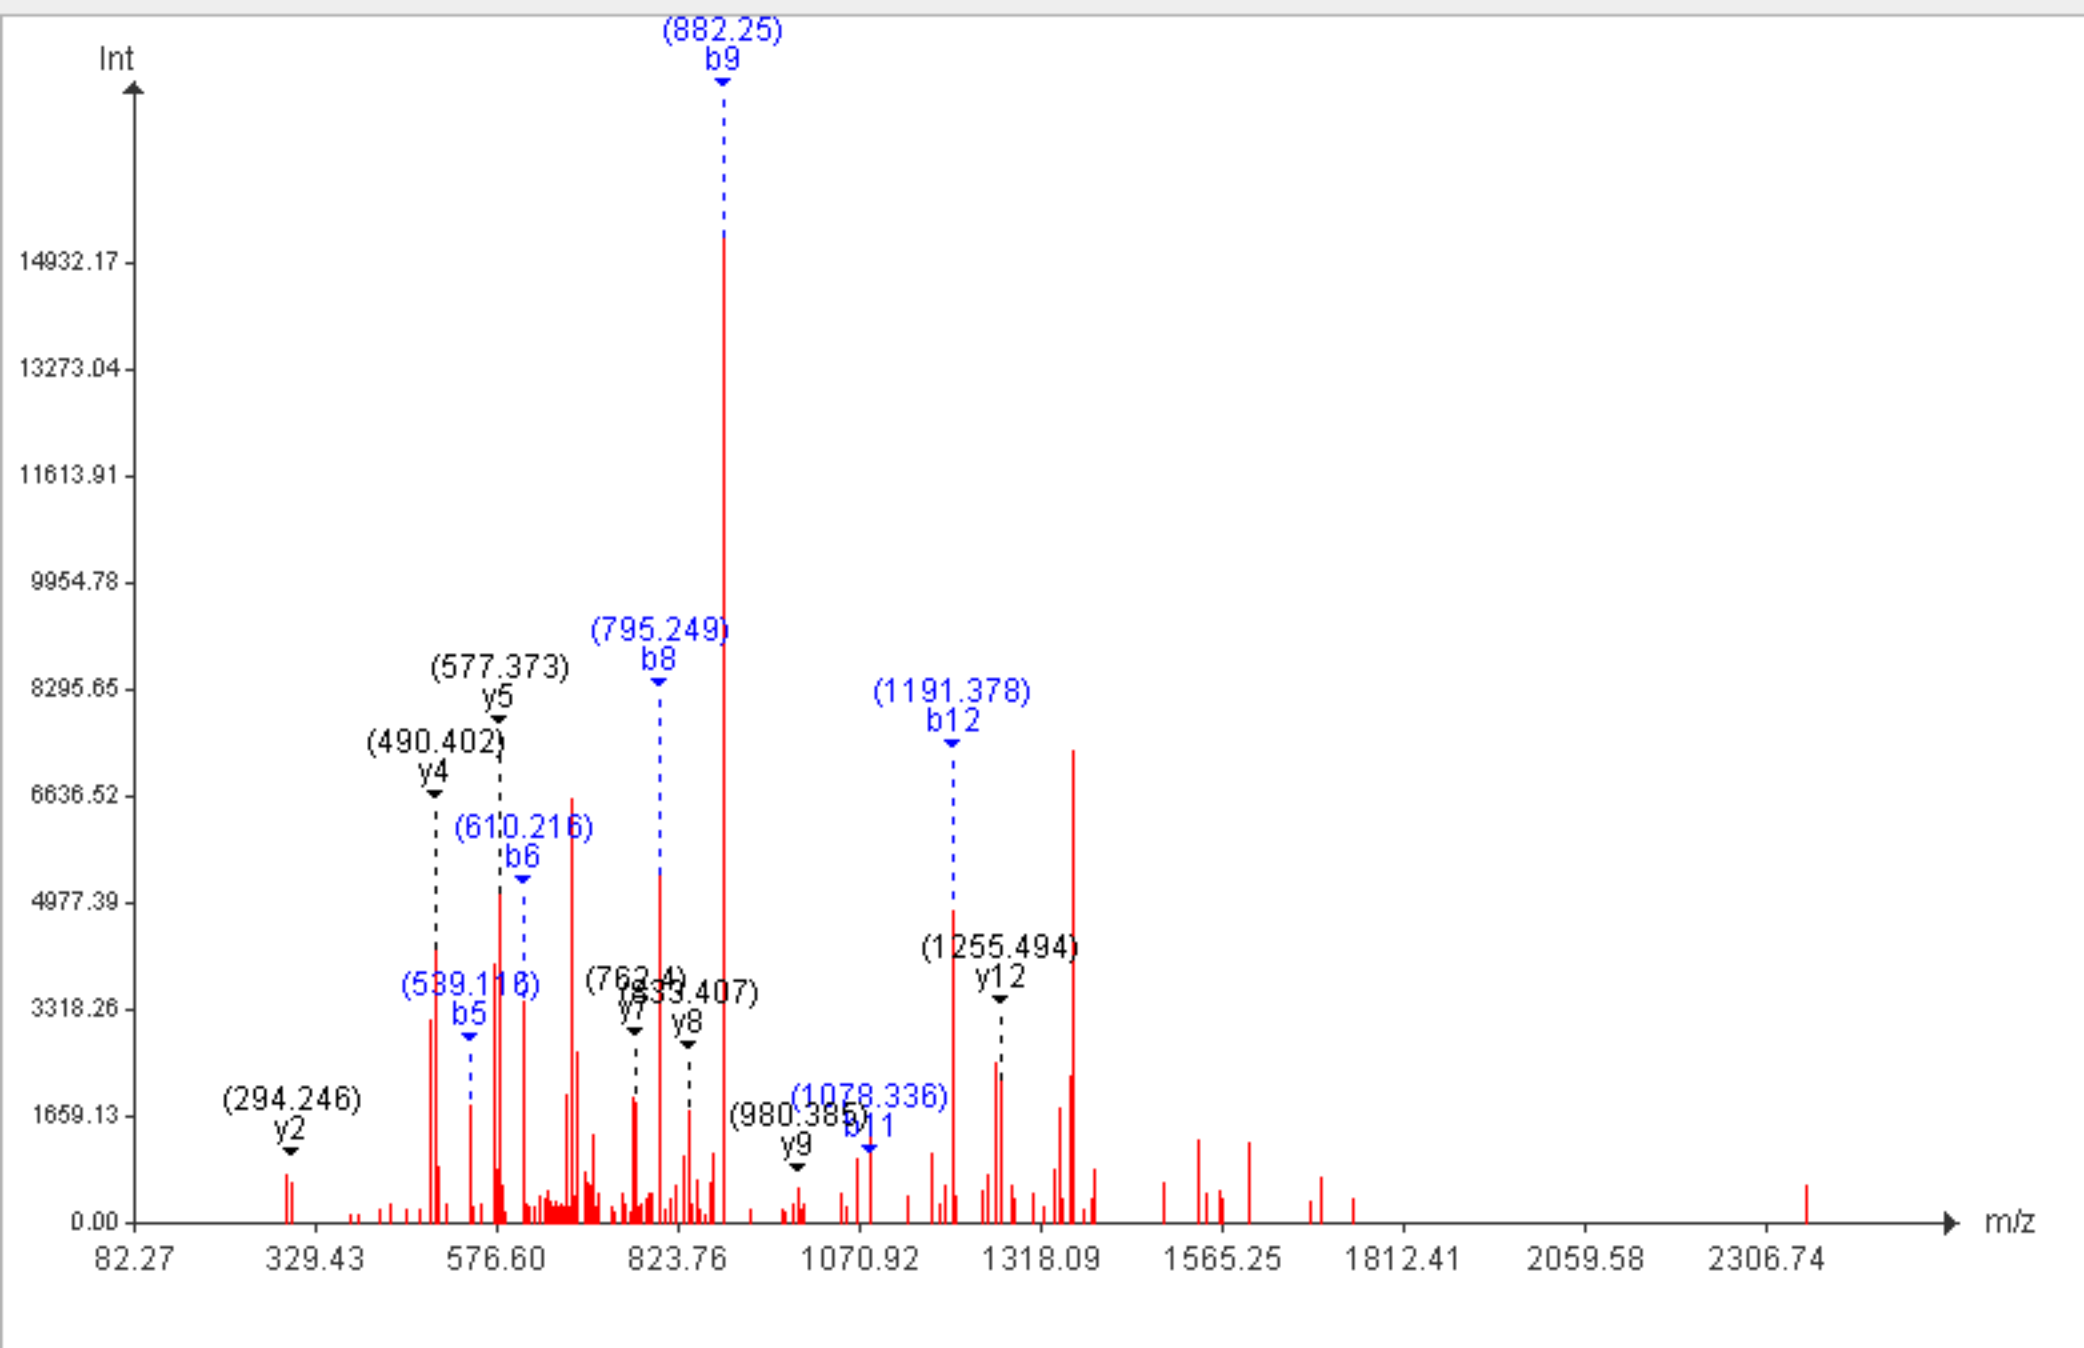

**AcD3-GQVITIGN(Dam)ER-COOH**

**precursor mass: 566.8560 Da (charge: +2) protein: P62737 (247-256)**

**score (threshold): 63.0 (34.0)**

**instrument: Bruker Esquire HCT**

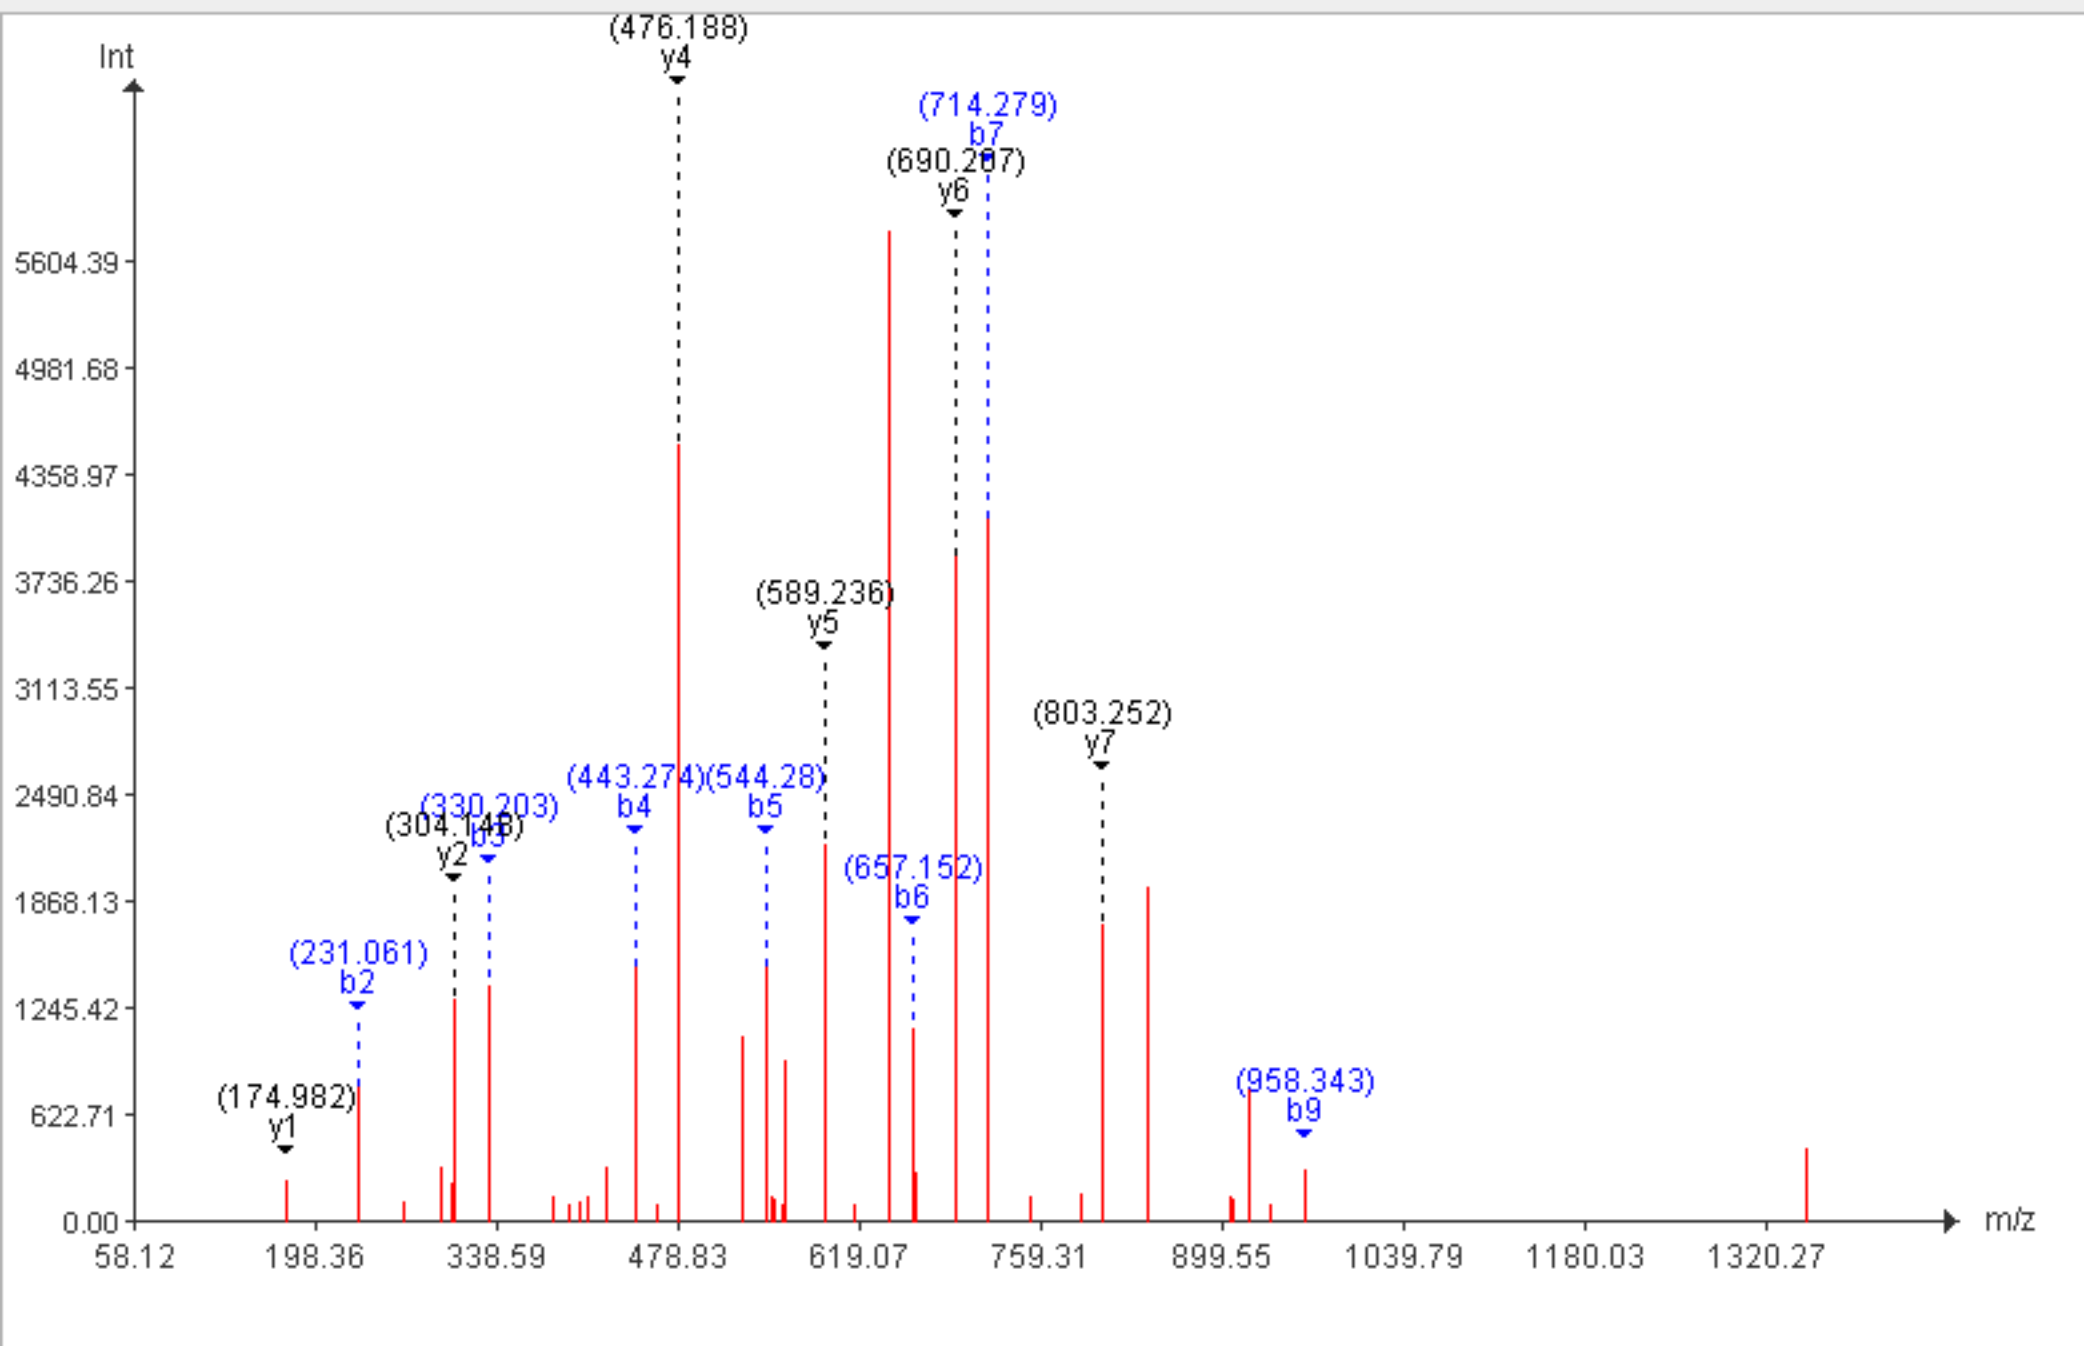

*AcD3-GQVITIGN(Dam)ER-COOH*

precursor mass: 566.6960 Da (charge: +2) protein: P62737 (247-256)

score (threshold): 64.0 (31.0)

instrument: Bruker Esquire HCT

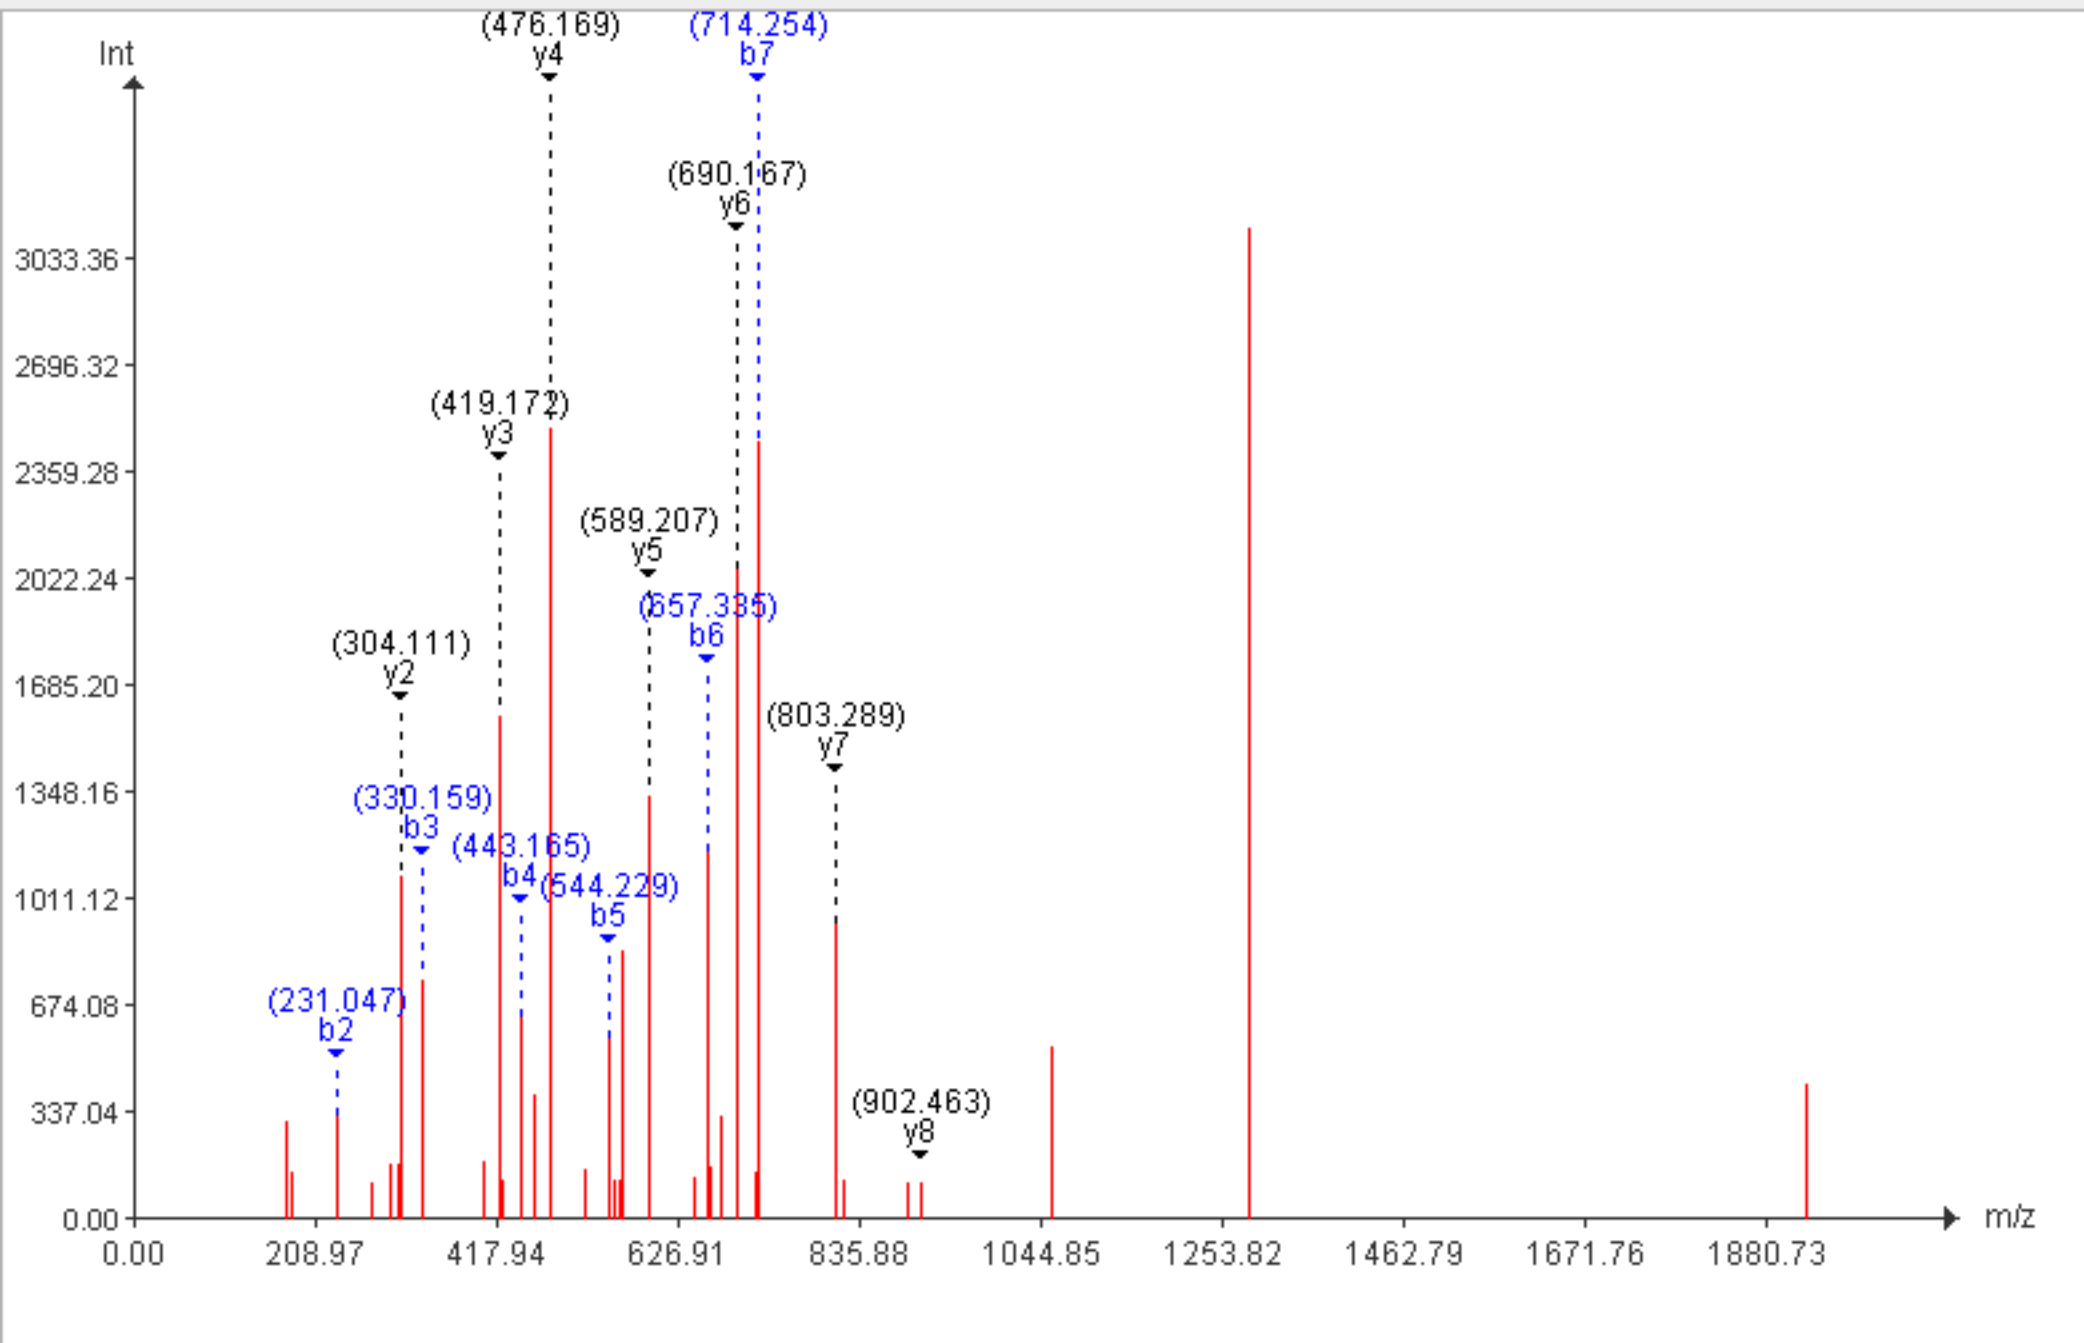

*AcD3-GVM(Mox)N(Dam)GEYYQESNGPTDSYAAISEVDR-COOH*  
precursor mass: 972.1120 Da (charge: +3) protein: O08585 (76-101)  
score (threshold): 71.0 (36.0)  
instrument: Bruker Esquire HCT

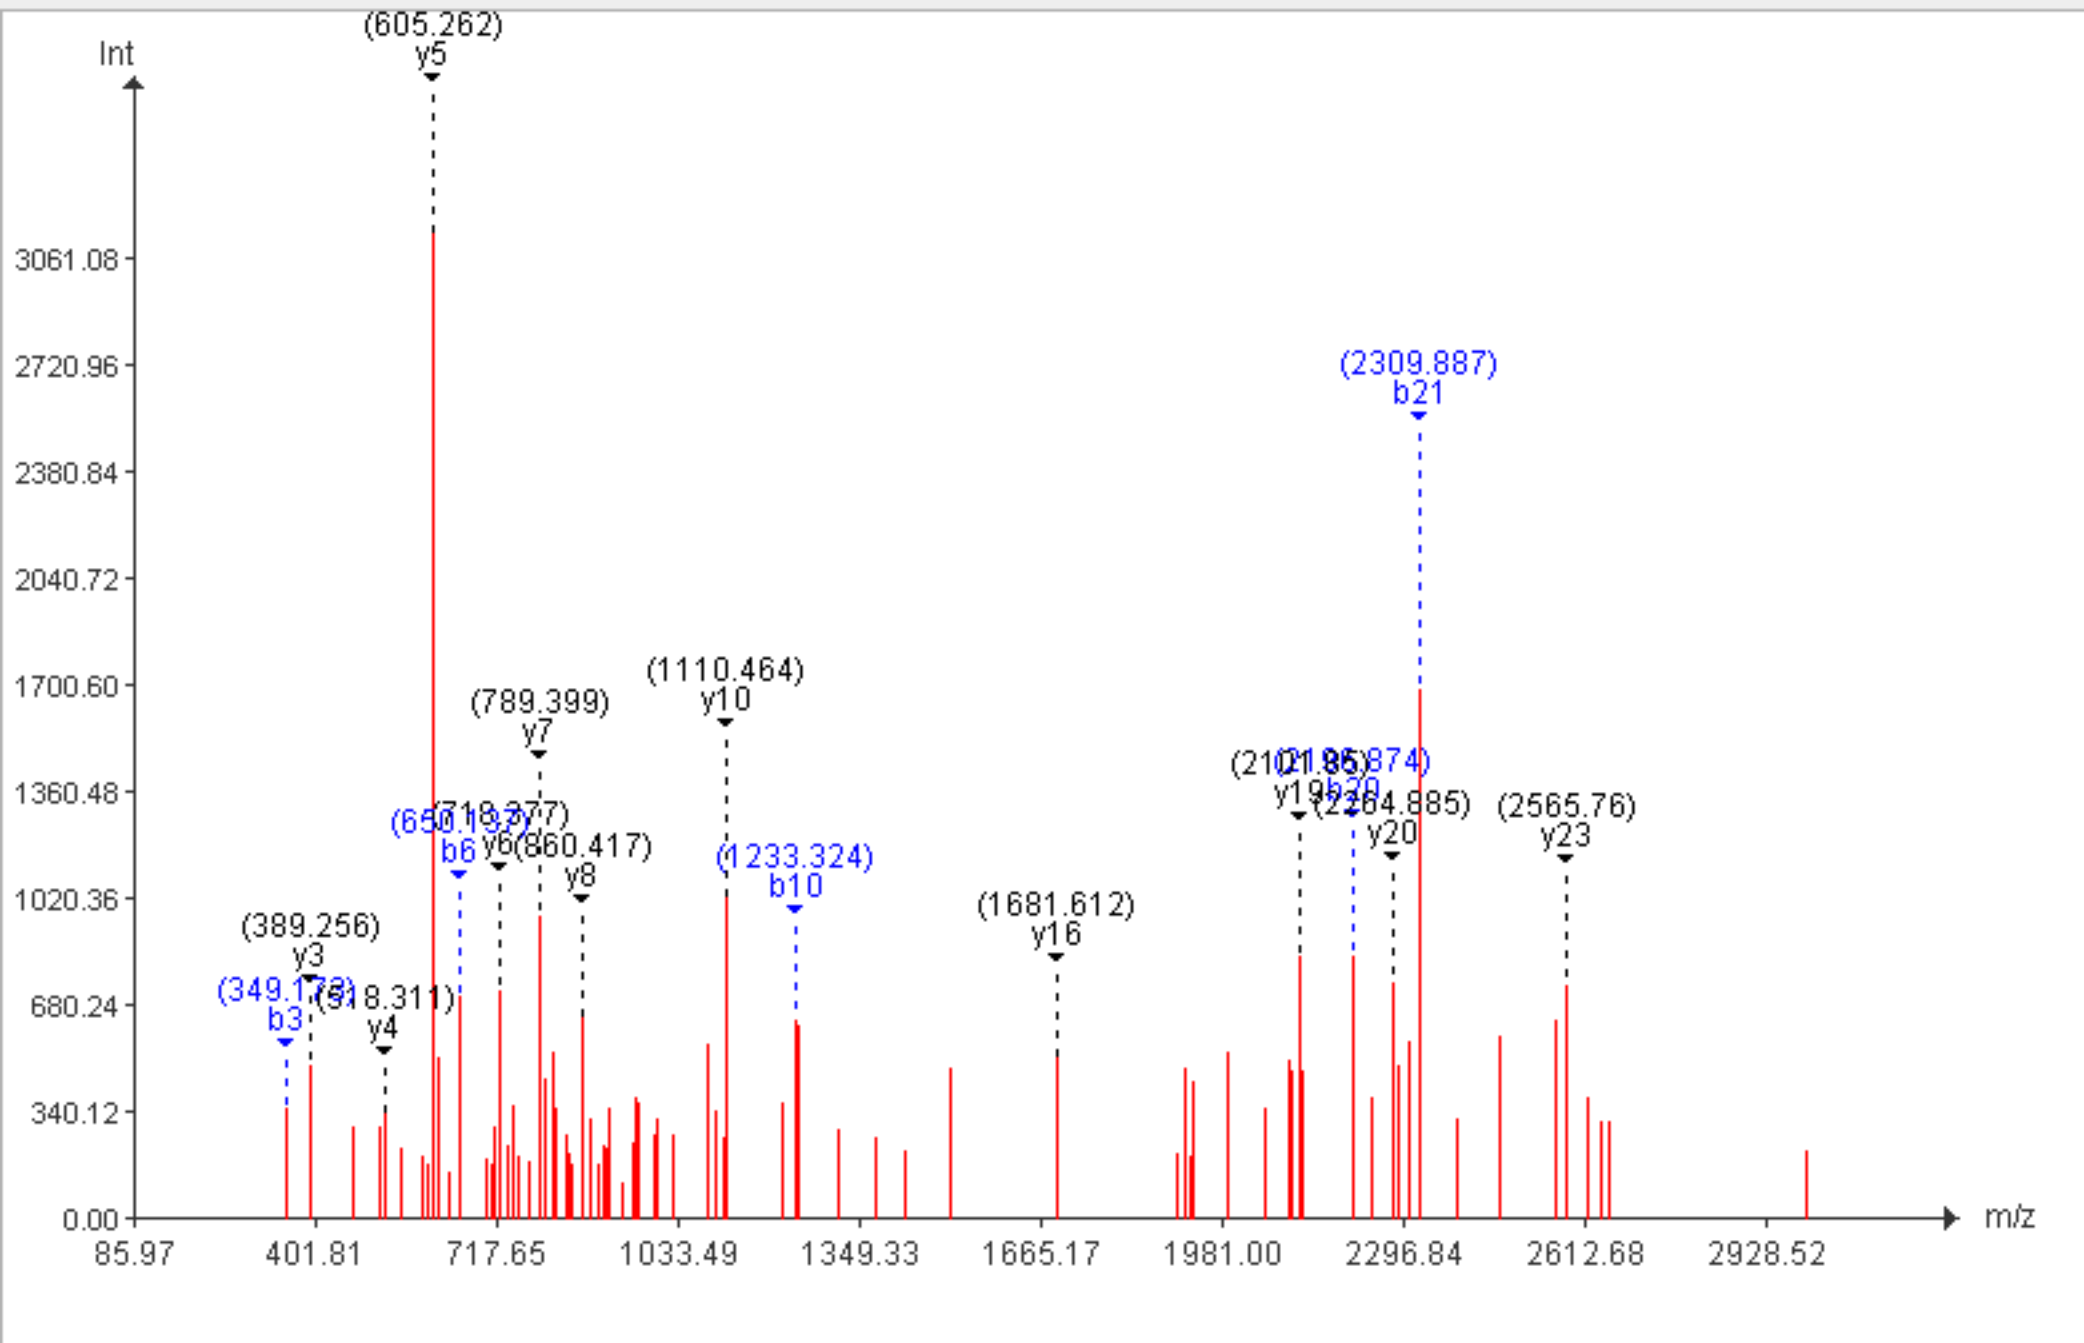

**AcD3-SGPPAK(AcD3K\*)K(AcD3K\*)IR(C13\*)-COOH**  
**precursor mass: 547.7510 Da (charge: +2) protein: Q80XU3 (30-38)**  
**score (threshold): 48.0 (31.0)**  
**instrument: Bruker Esquire HCT**

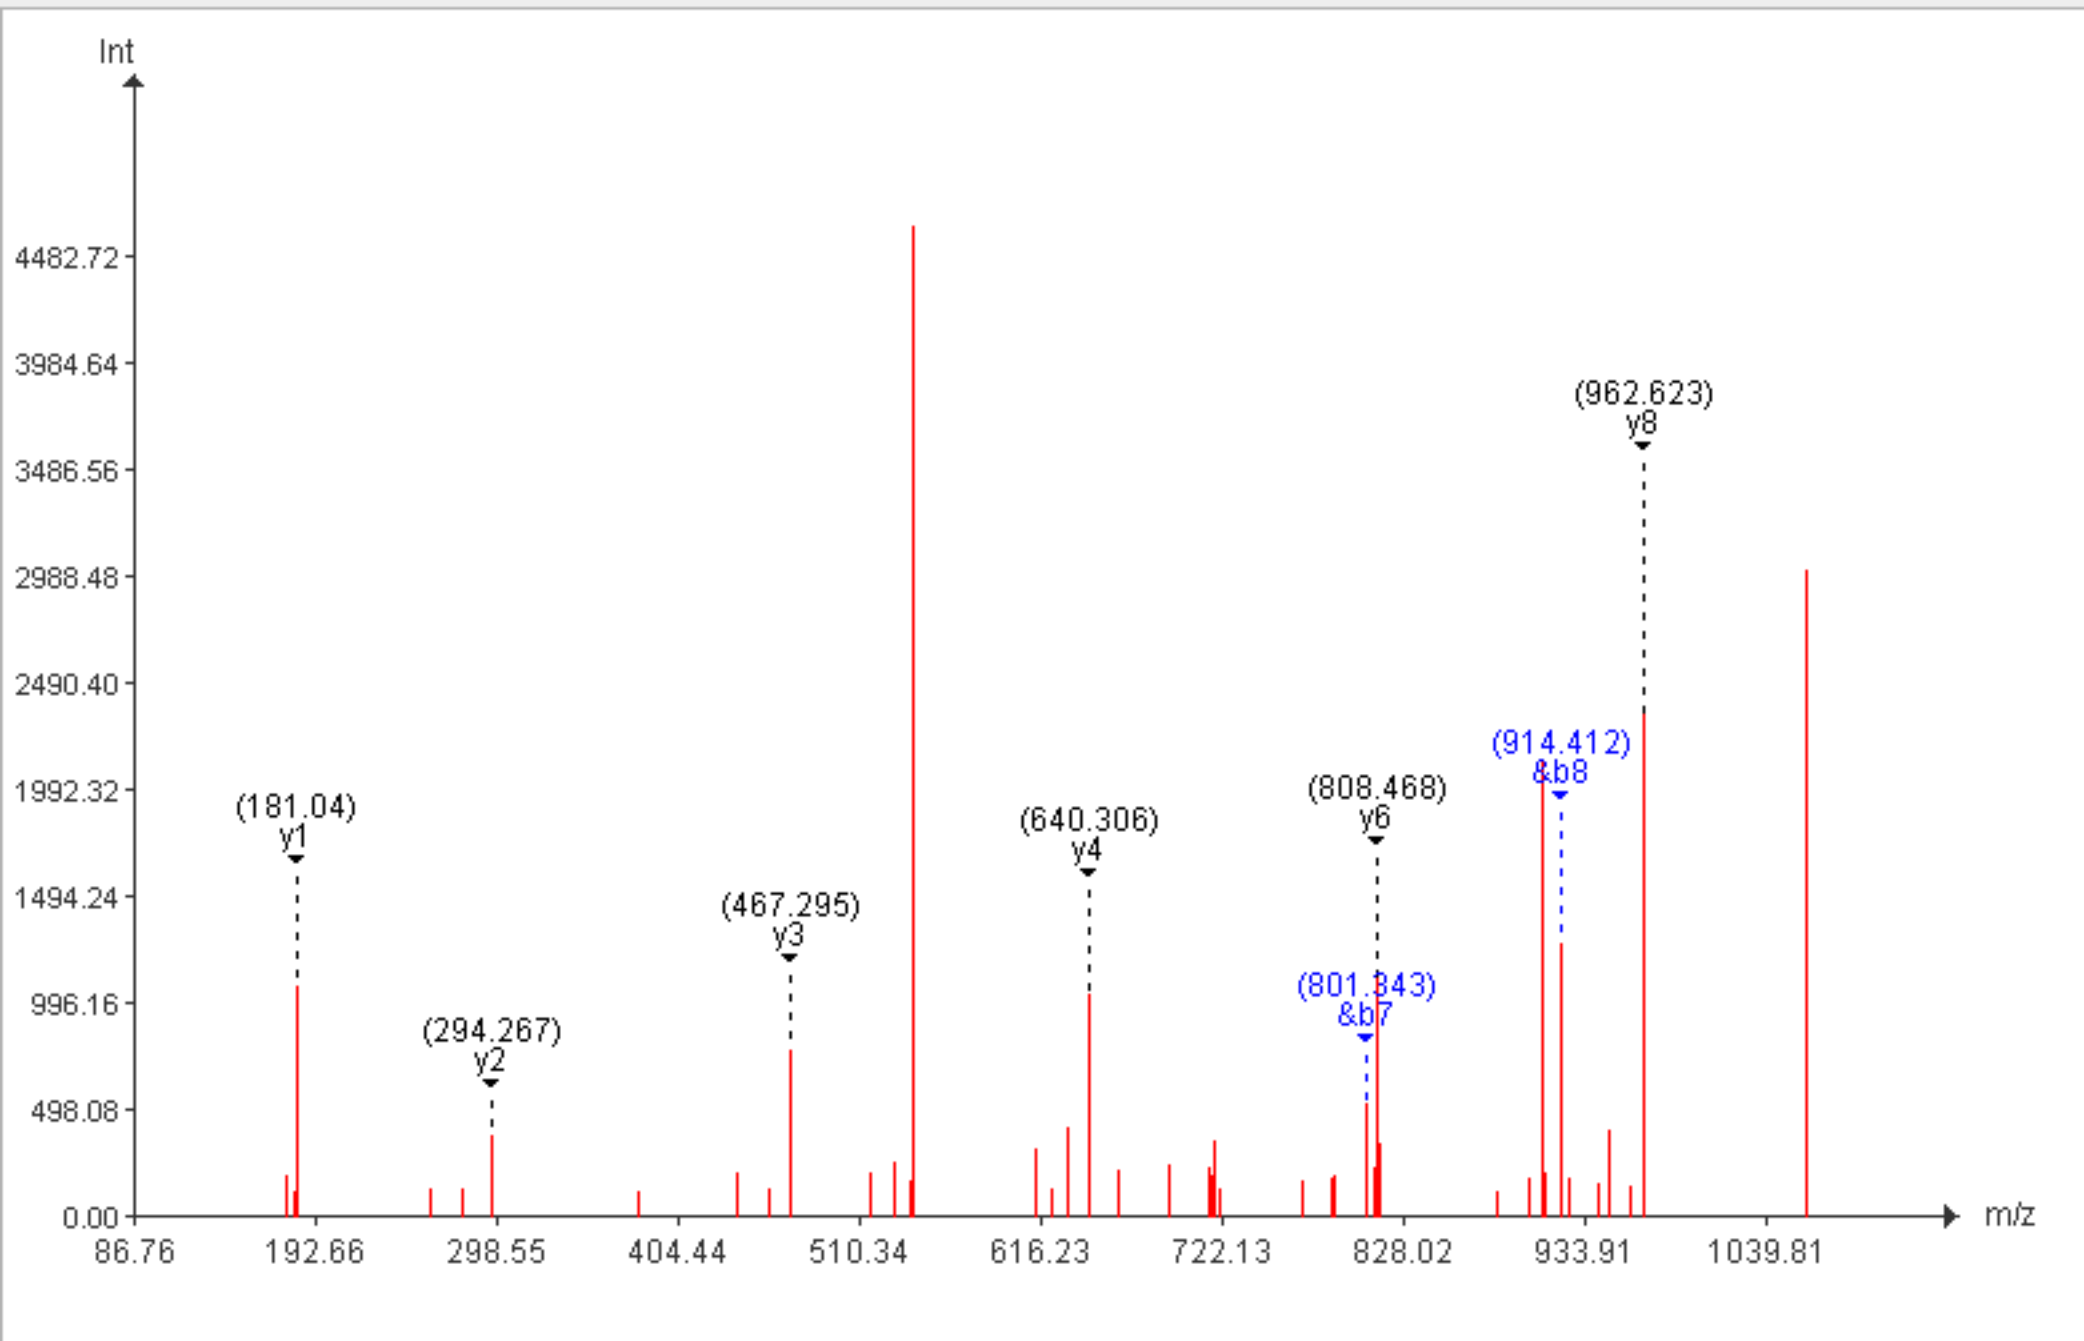

**AcD3-GK(AcD3K\*)VESIM(Mox)K(AcD3K\*)R(C13\*)-COOH**  
**precursor mass: 602.9130 Da (charge: +2) protein: IPI00007682.2 (300-308)**  
**score (threshold): 51.0 (34.0)**  
**instrument: Bruker Esquire HCT**

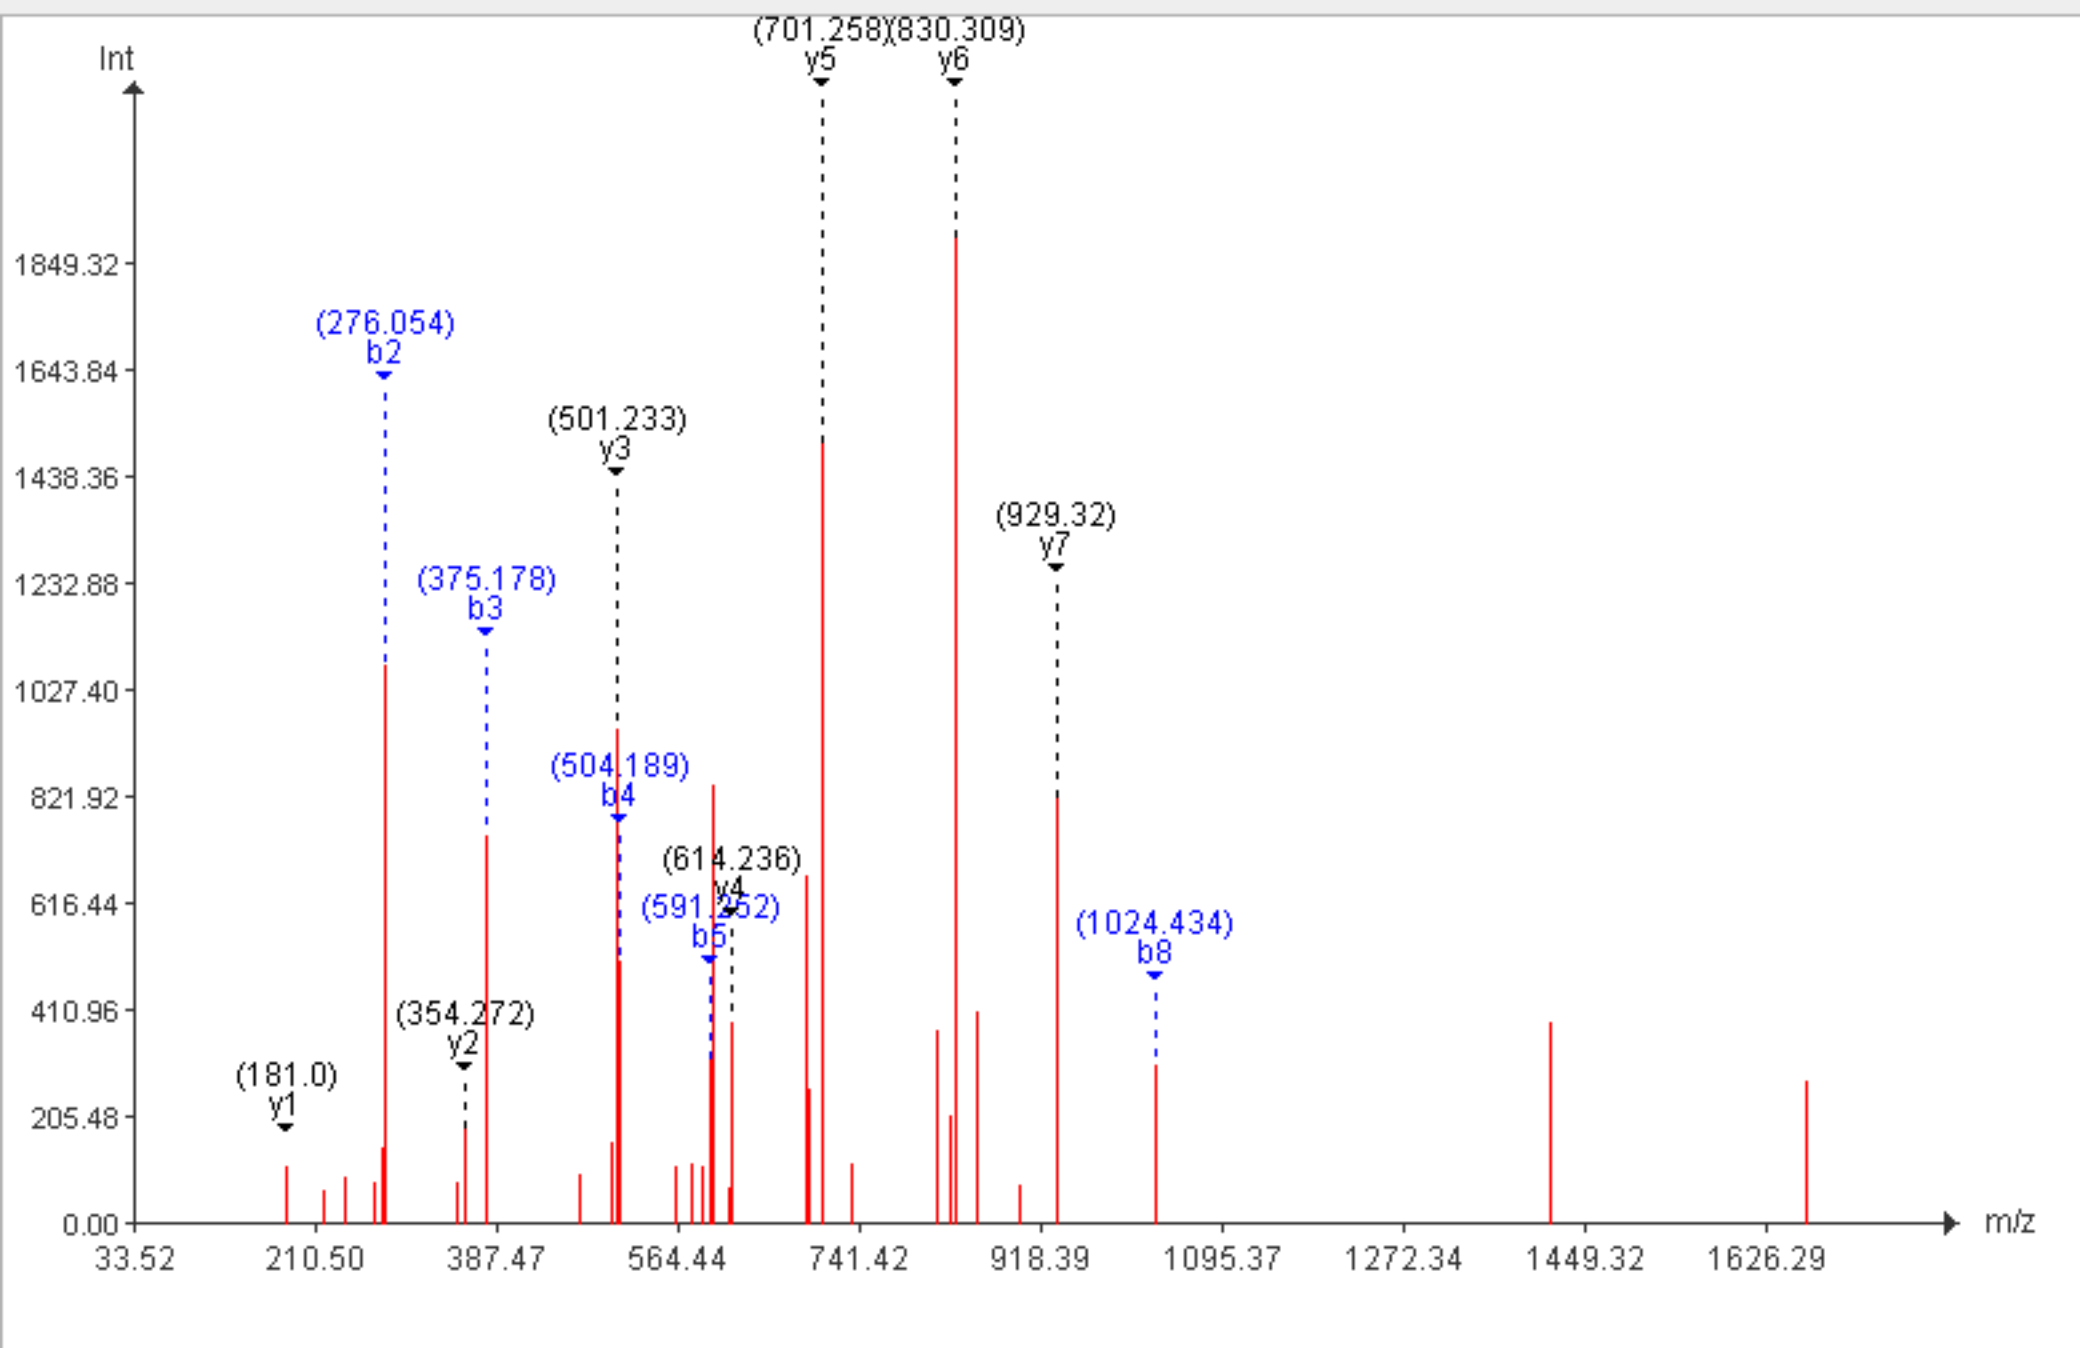



*AcD3-GQVITIGN(Dam)ER-COOH*

precursor mass: 566.7920 Da (charge: +2) protein: P62737 (247-256)

score (threshold): 69.0 (34.0)

instrument: Bruker Esquire HCT

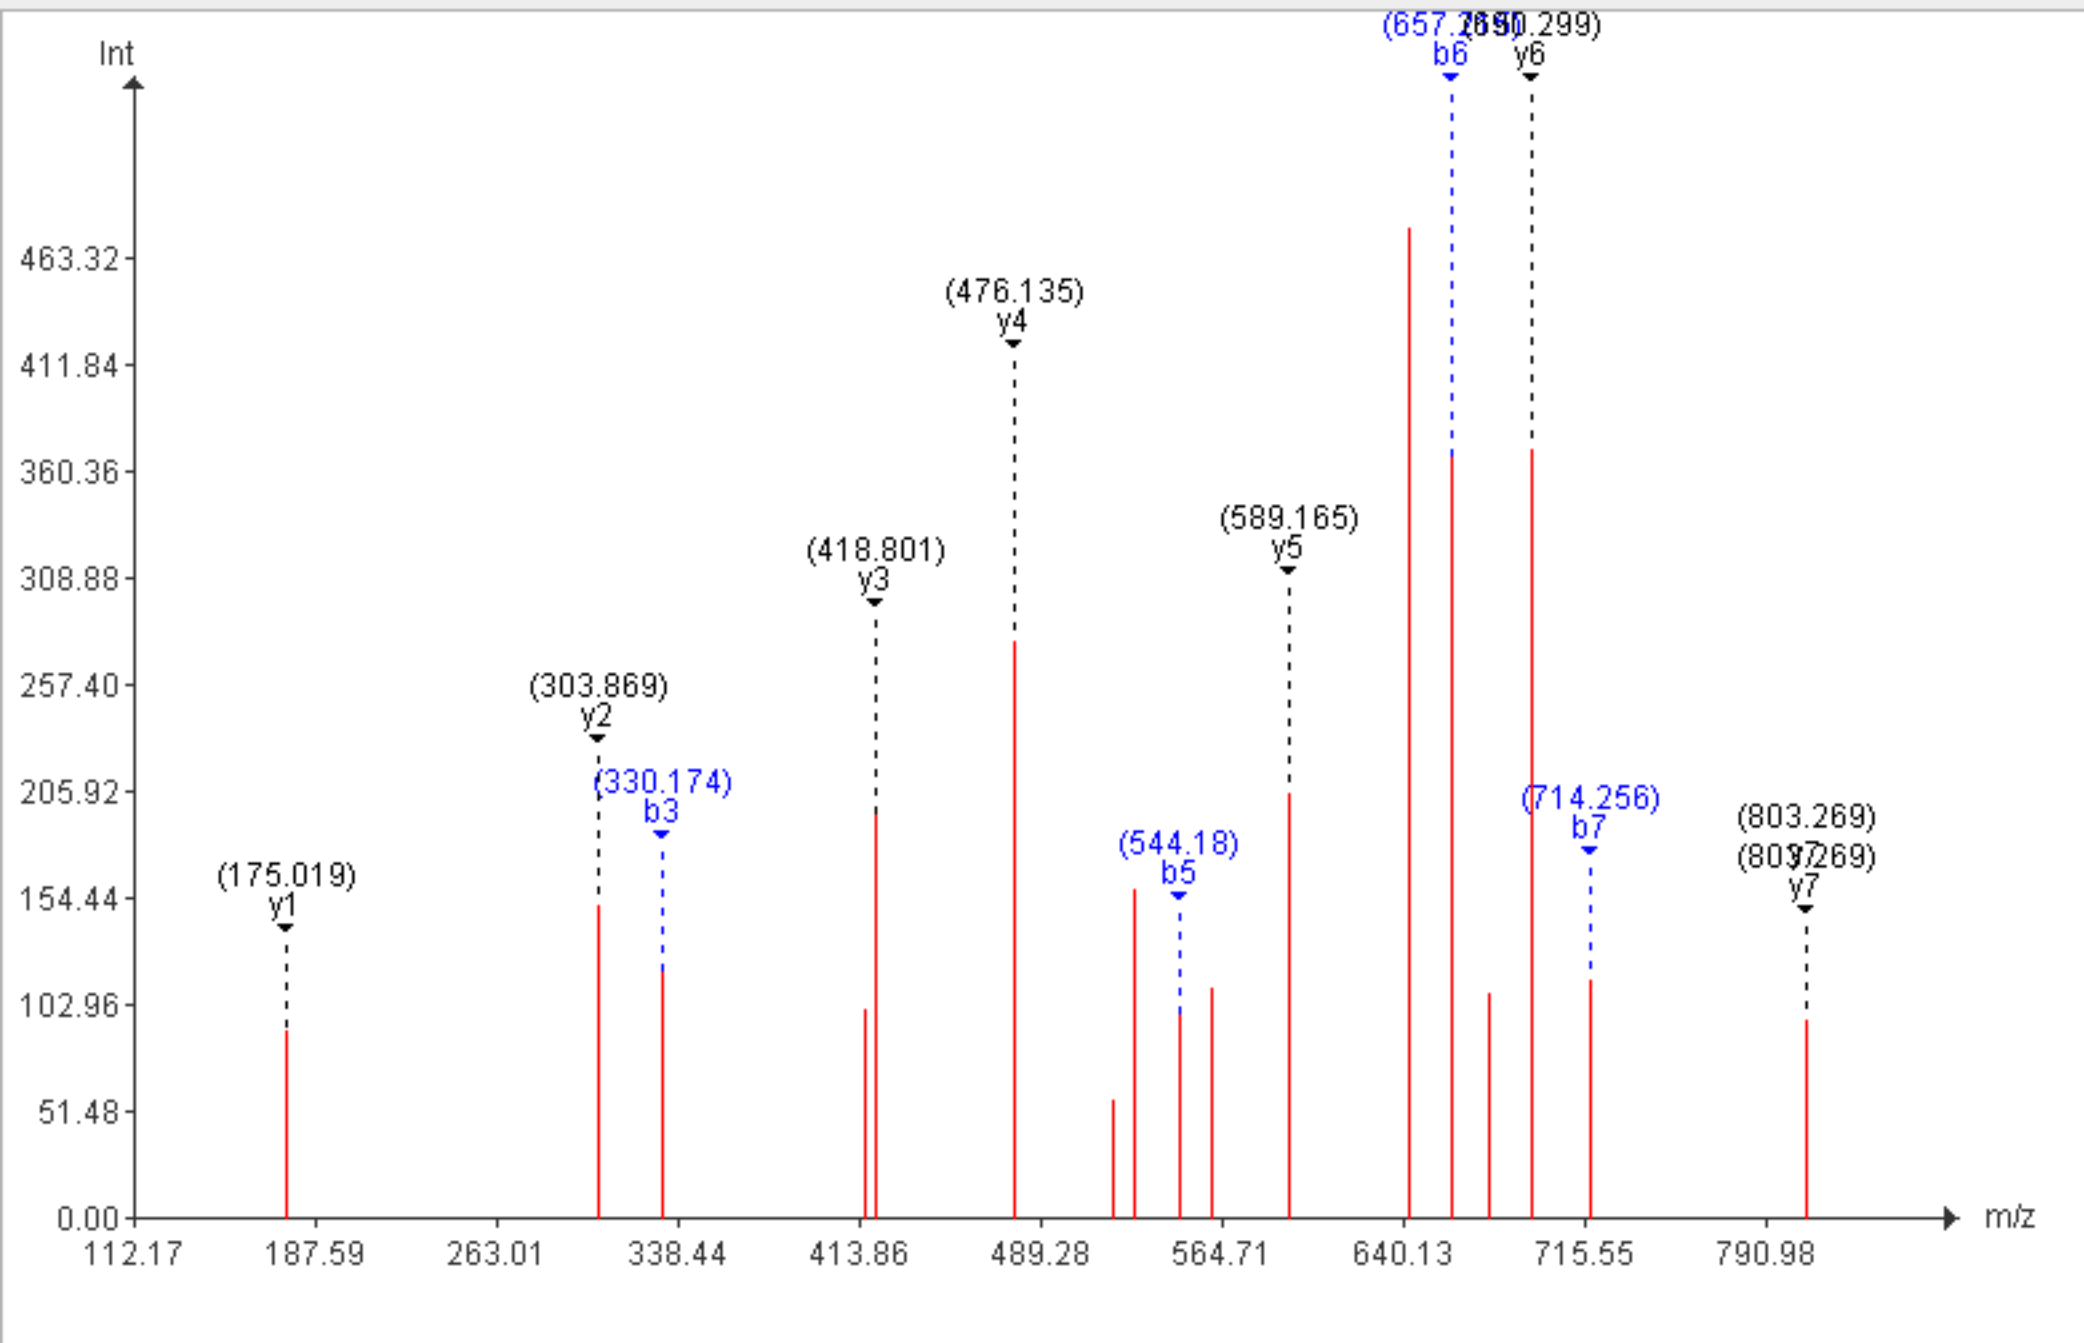

**AcD3-AK(AcD3K\*)AEEEFNIEK(AcD3K\*)GR-COOH**  
**precursor mass: 828.3610 Da (charge: +2) protein: P50518 (33-45)**  
**score (threshold): 82.0 (31.0)**  
**instrument: Bruker Esquire HCT**

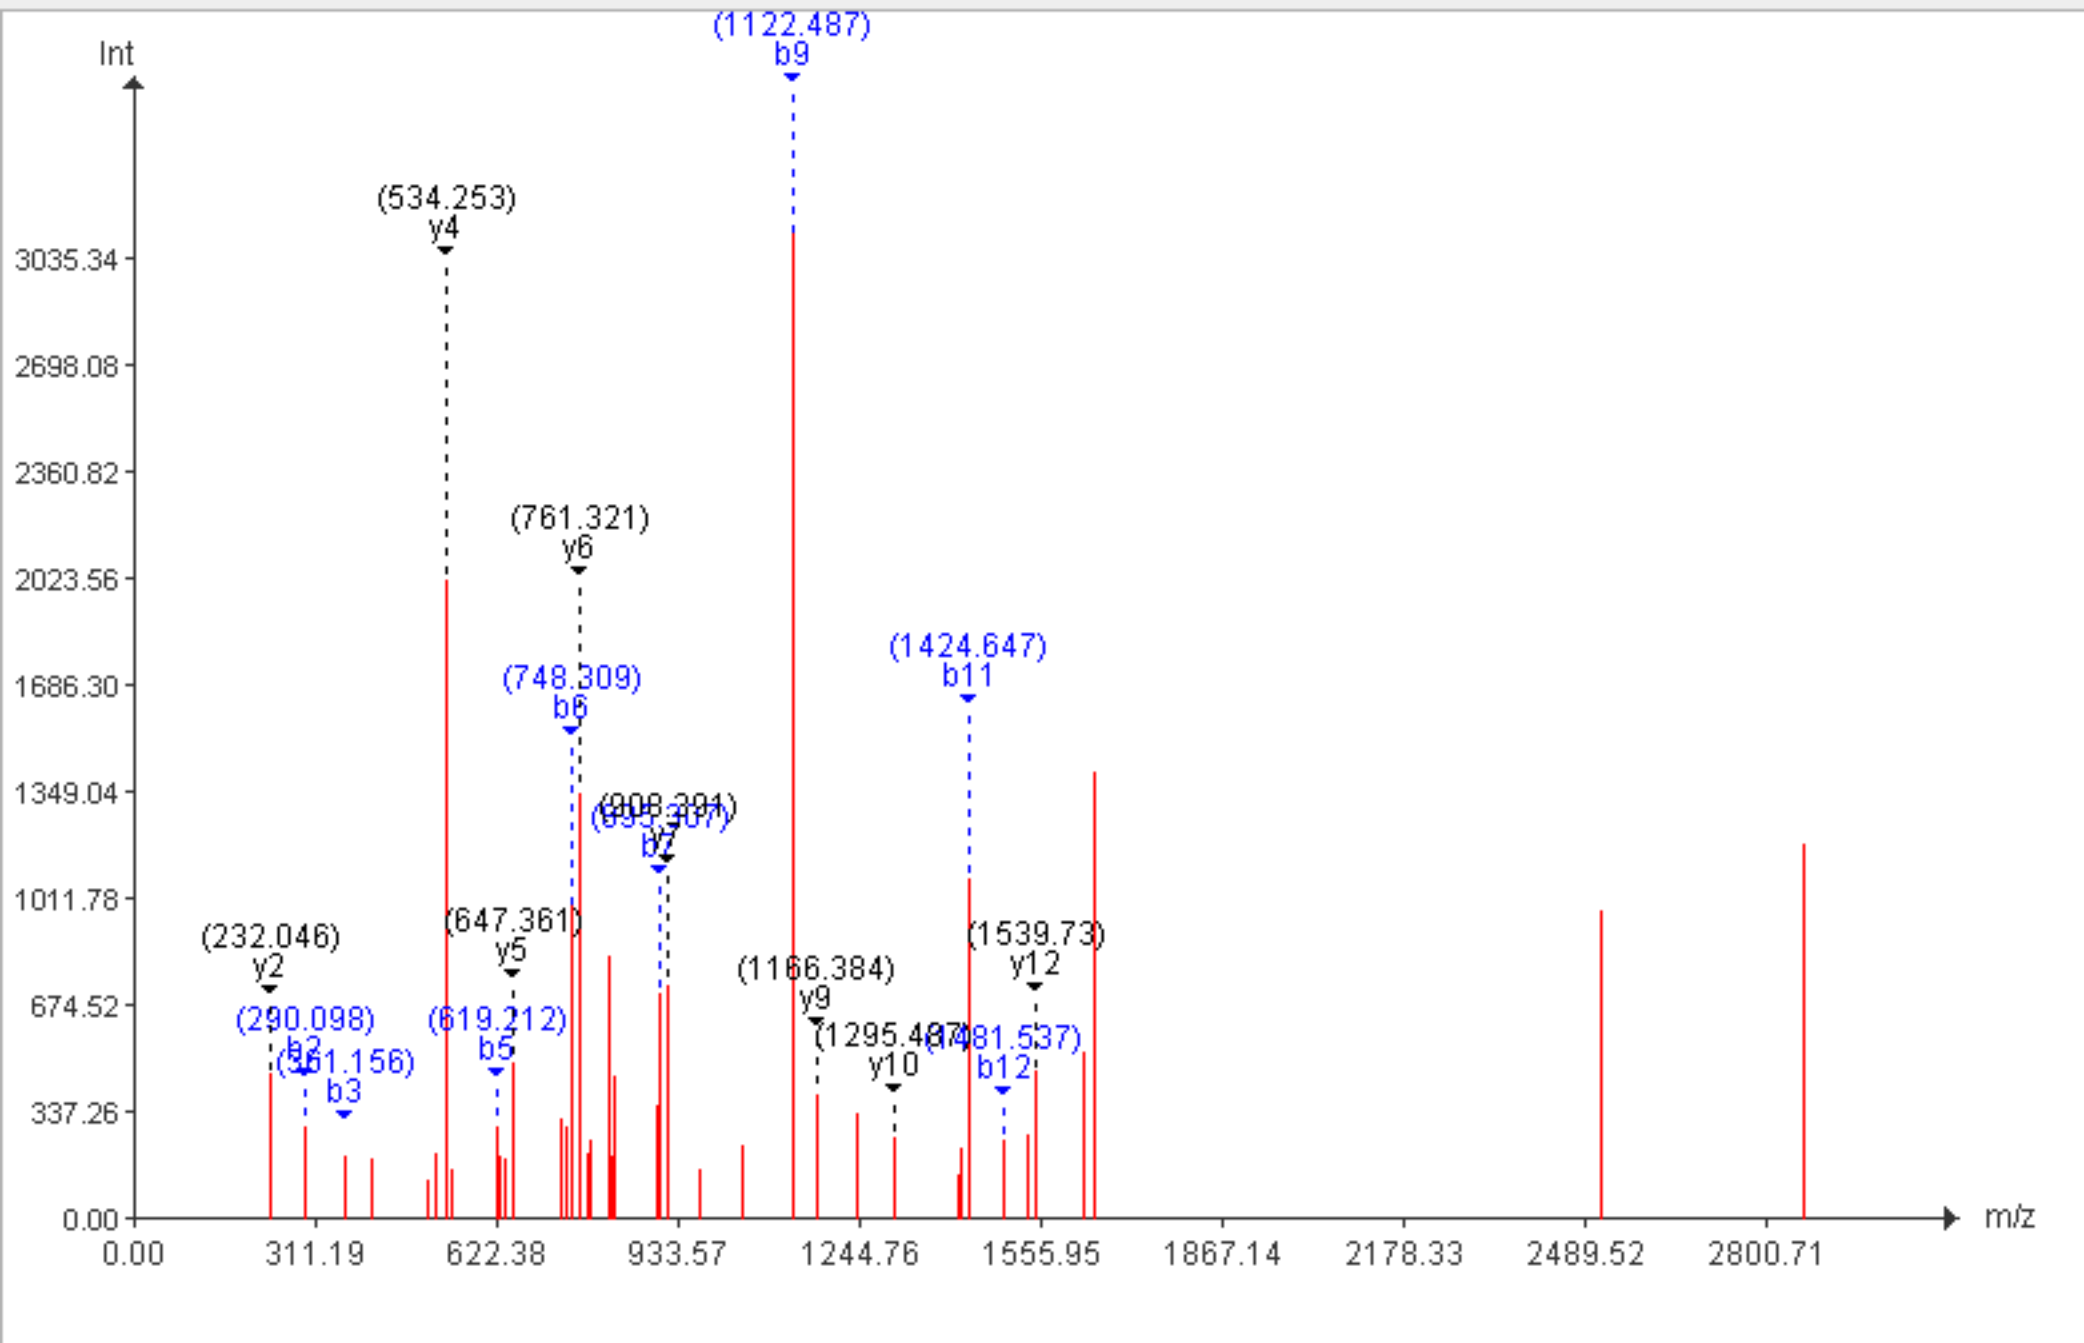

**AcD3-GQVITIGNER-COOH**

**precursor mass: 566.4000 Da (charge: +2) protein: P62737 (247-256)**

**score (threshold): 71.0 (31.0)**

**instrument: Bruker Esquire HCT**

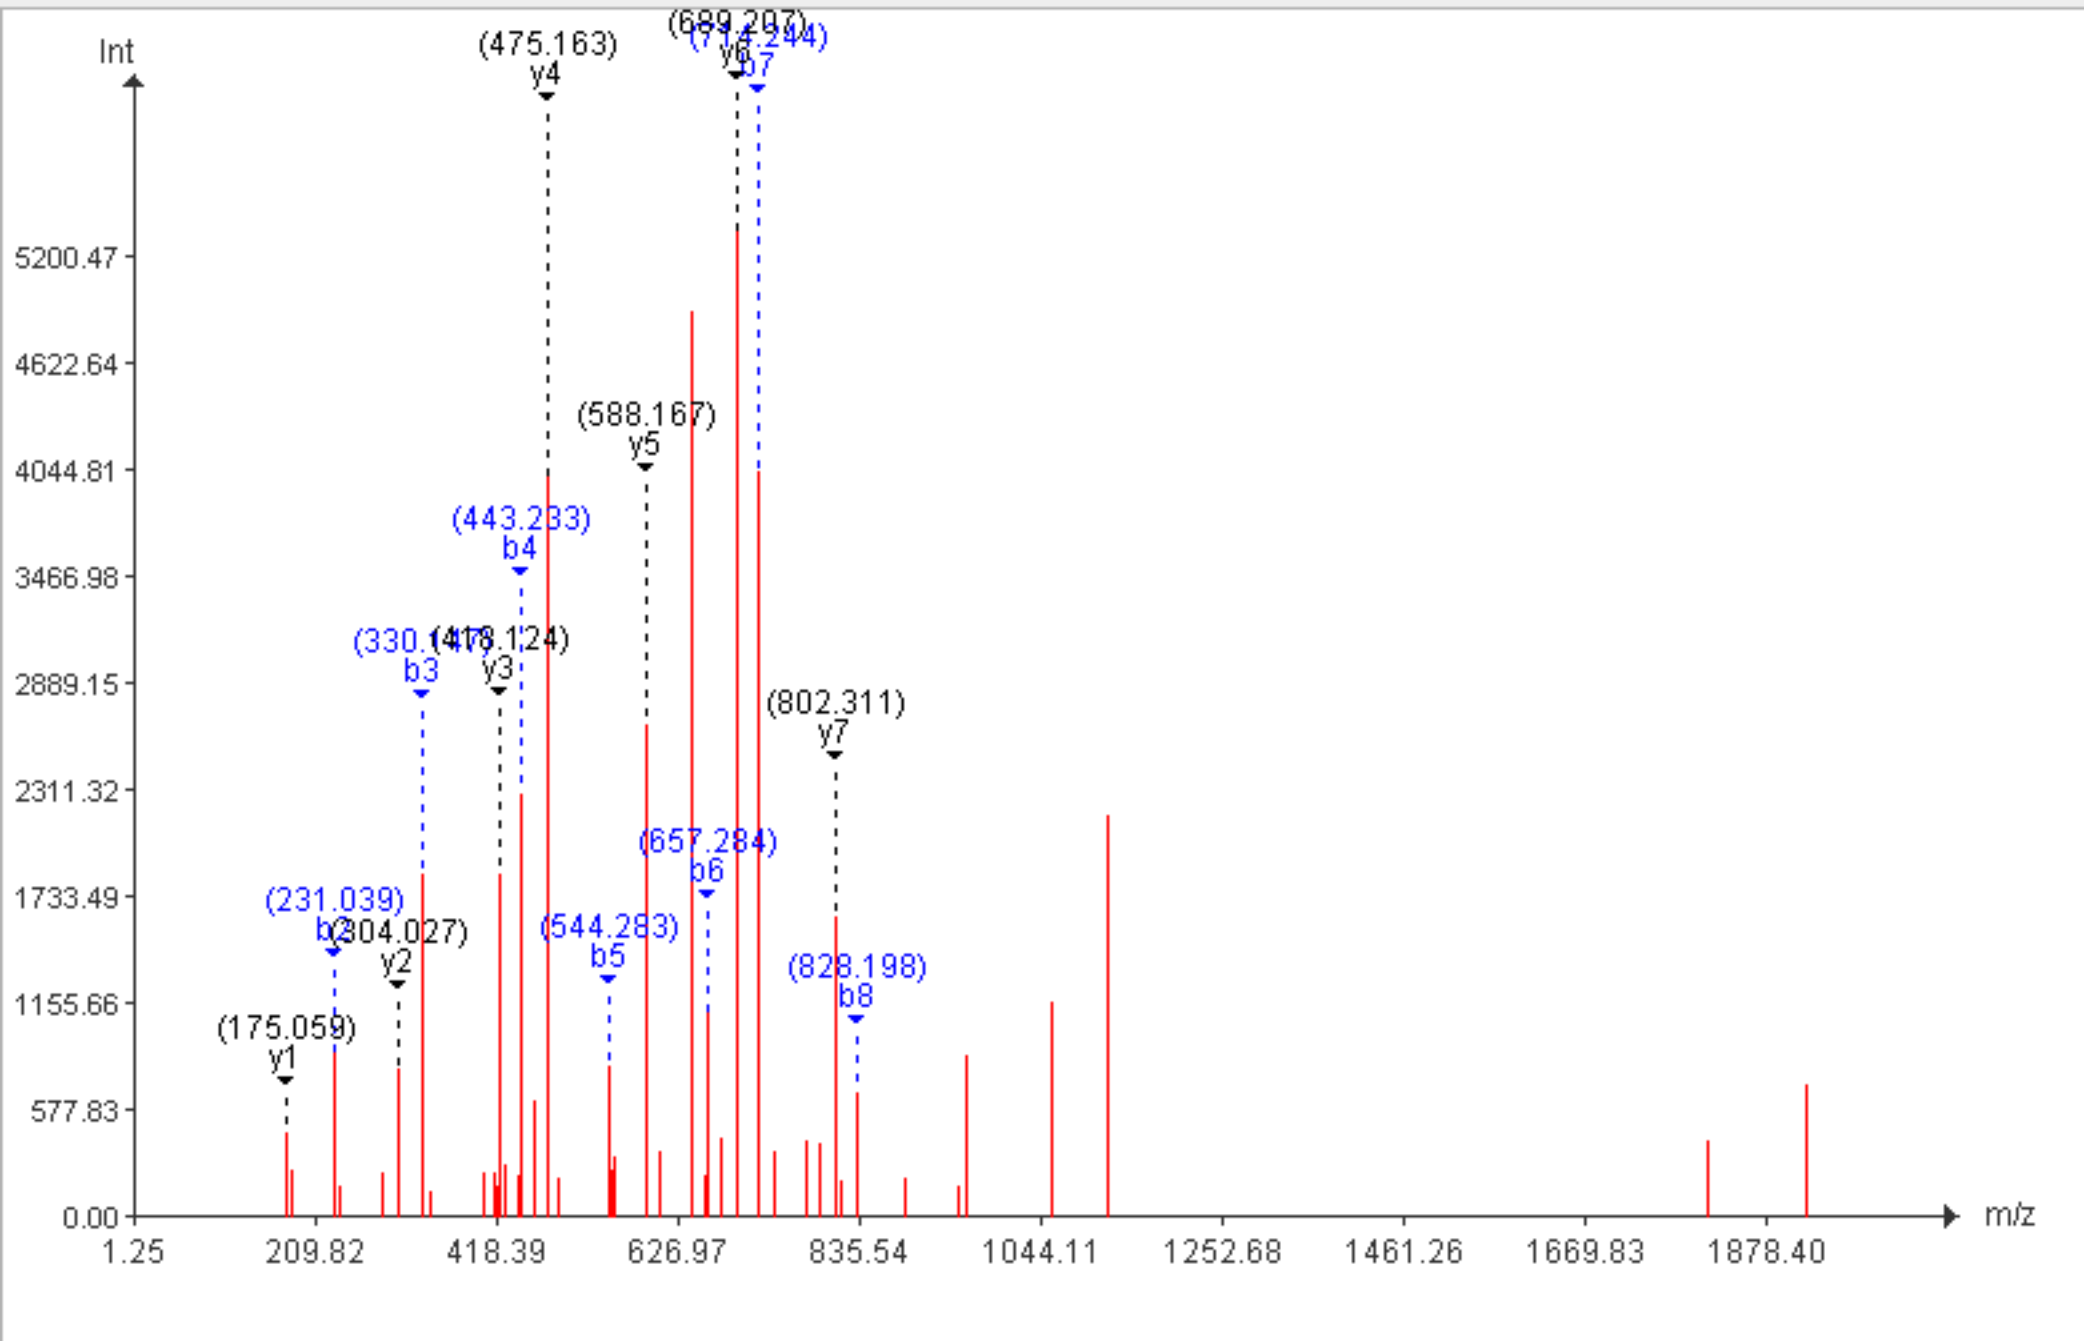

**AcD3-GADC(Cmm\*)IM(Mox)LSGETAK(AcD3K\*)GDYPLEAVR-COOH**  
precursor mass: 1229.9920 Da (charge: +2) protein: P52480 (354-375)  
score (threshold): 35.0 (31.0)  
instrument: Bruker Esquire HCT

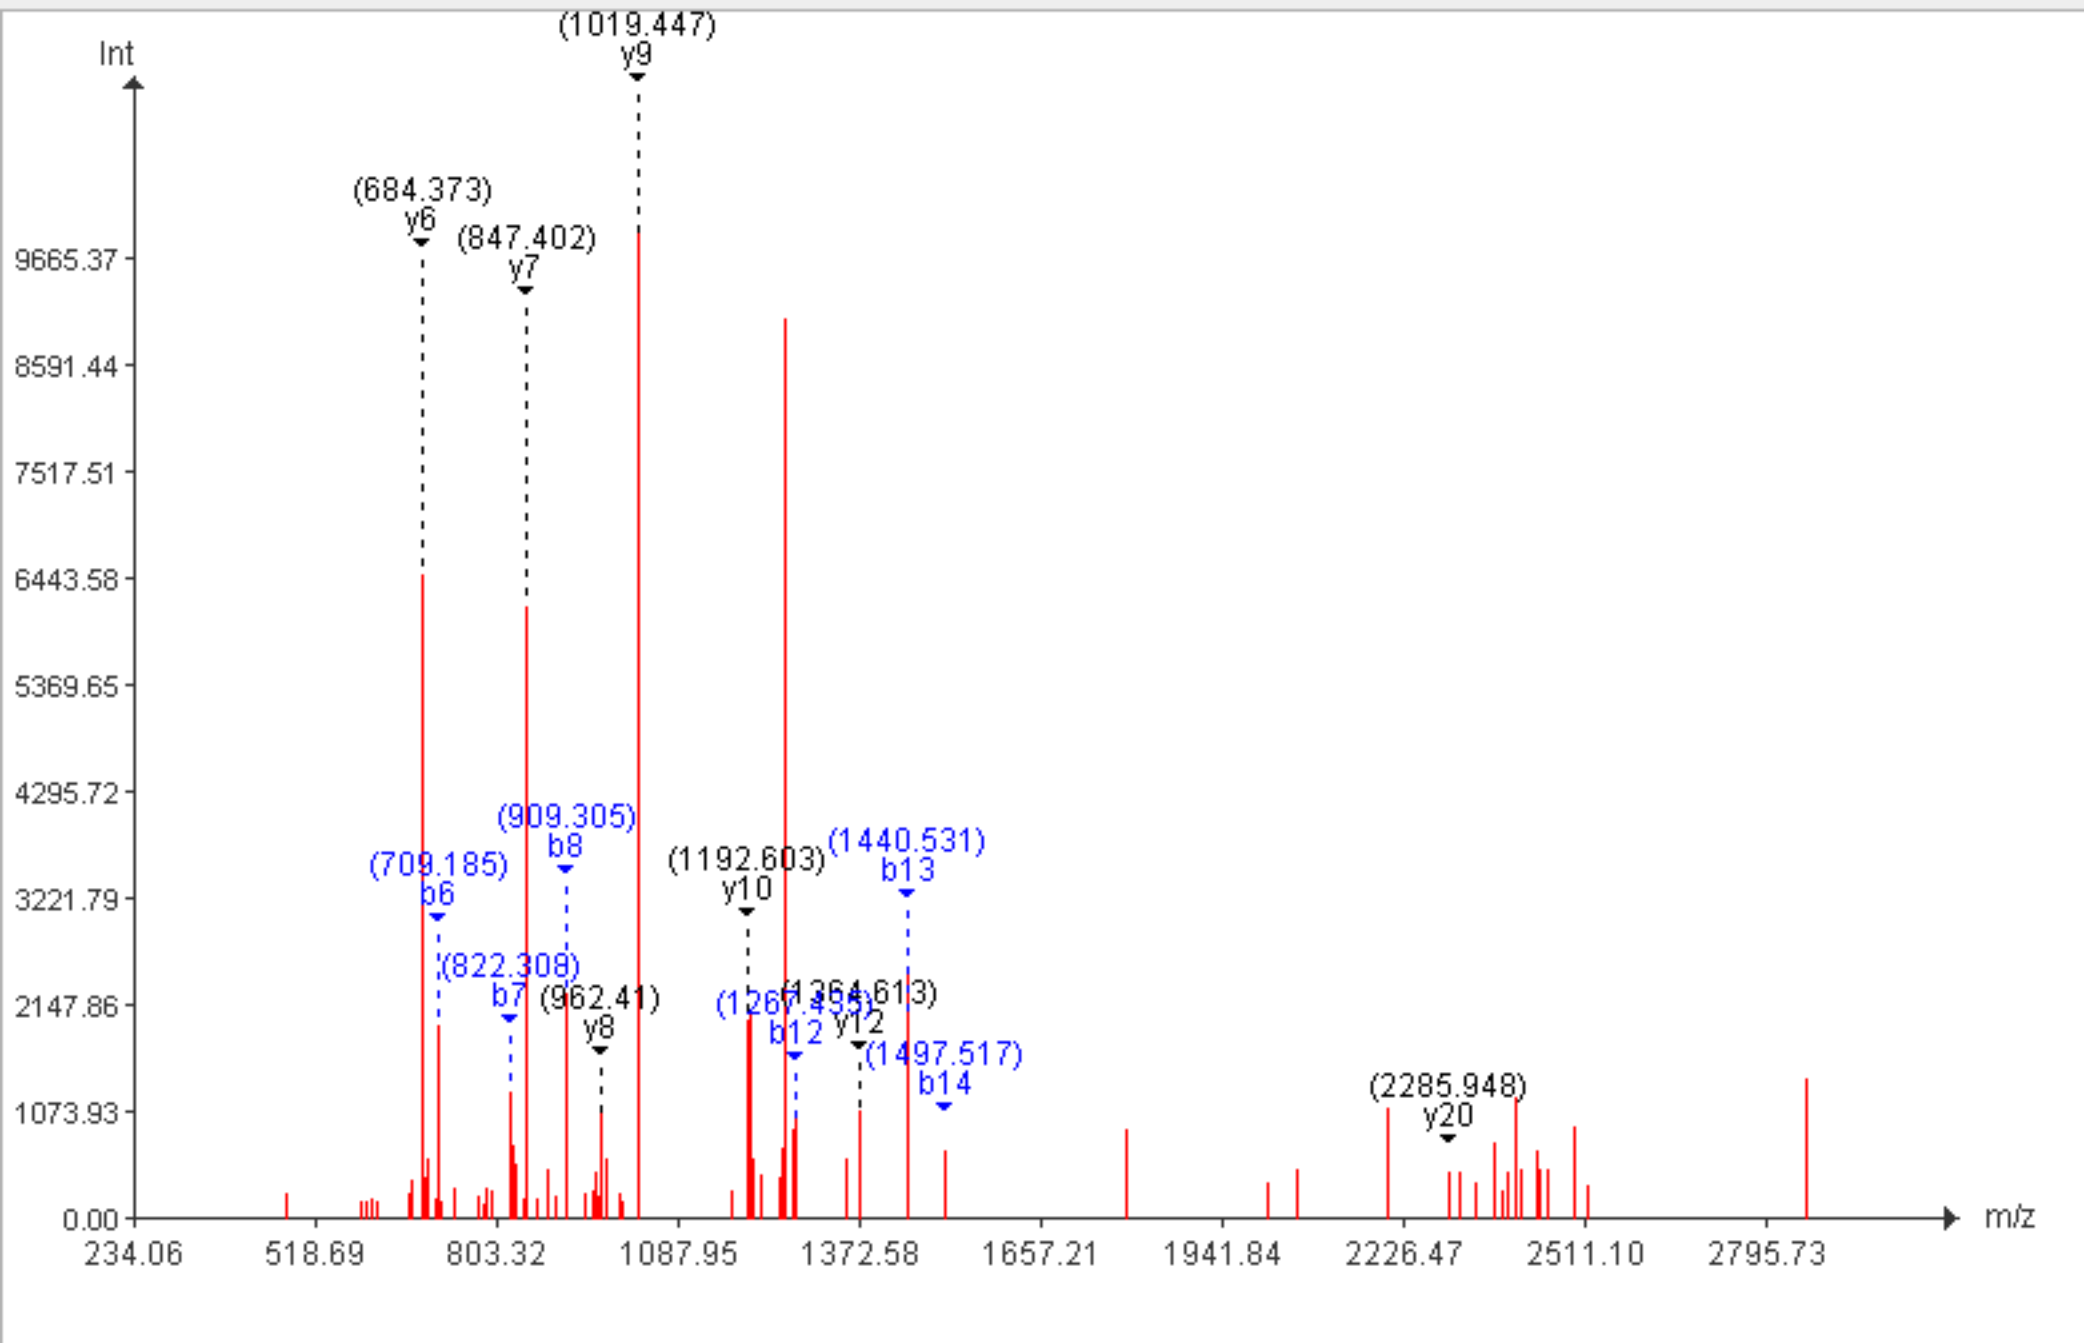

**AcD3-N(Dam)GSGM(Mox)C(Cmm\*)K(AcD3K\*)AGFAGDDAPR(C13\*)-COOH**

**precursor mass: 912.3840 Da (charge: +2) protein: P60710 (12-28)**

**score (threshold): 49.0 (31.0)**

**instrument: Bruker Esquire HCT**

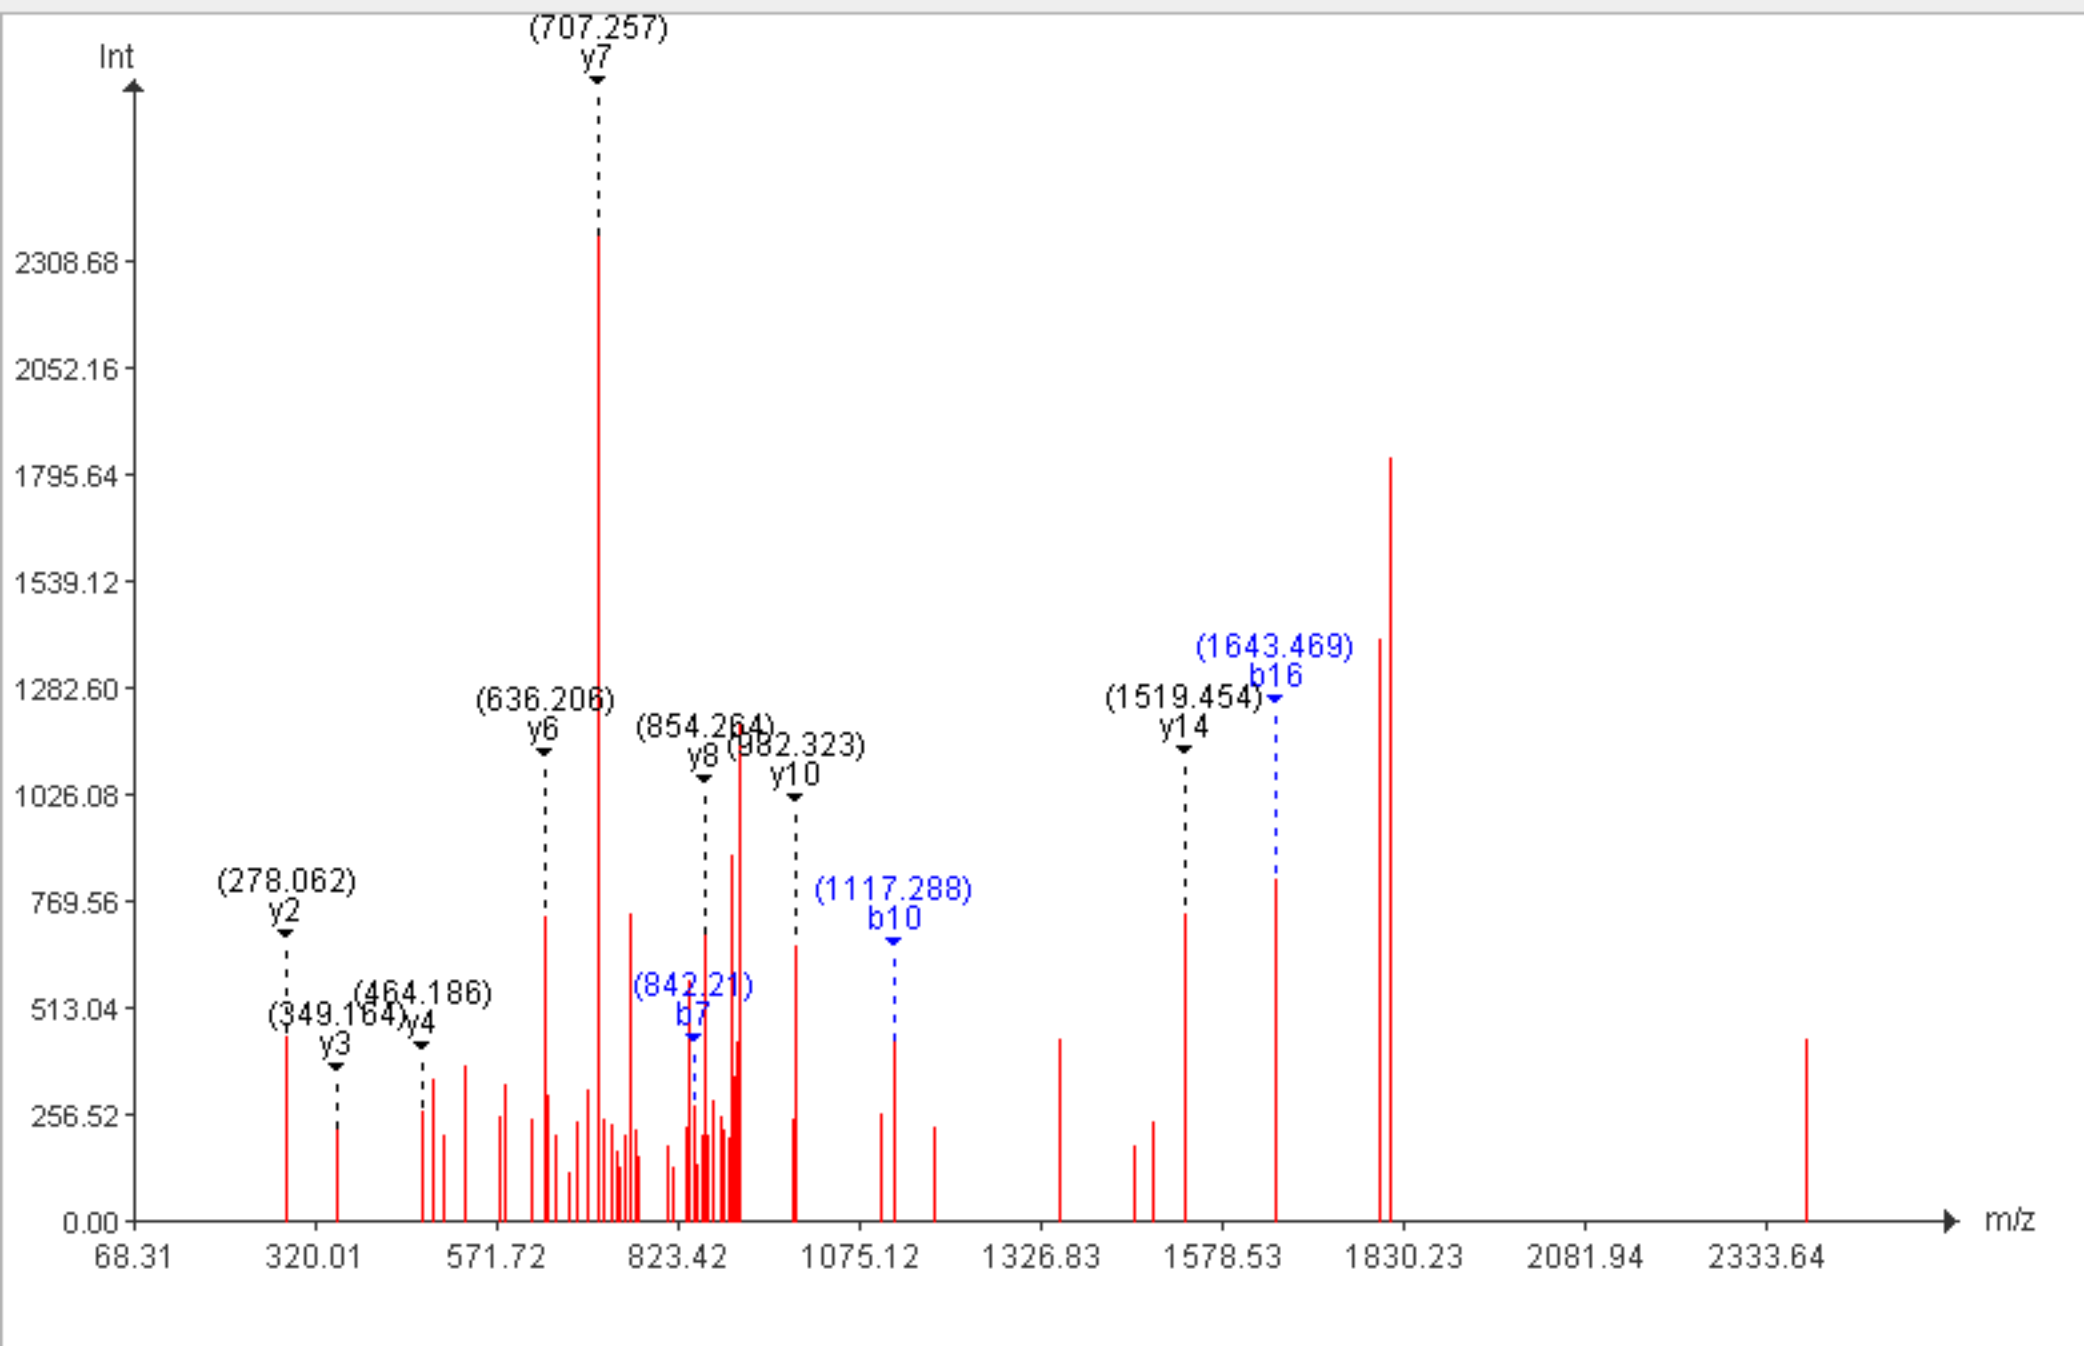

*AcD3-N(Dam)GSGM(Mox)C(Cmm\*)K(AcD3K\*)AGFAGDDAPR(C13\*)-COOH*

precursor mass: 912.3630 Da (charge: +2) protein: P60710 (12-28)

score (threshold): 31.0 (31.0)

instrument: Bruker Esquire HCT

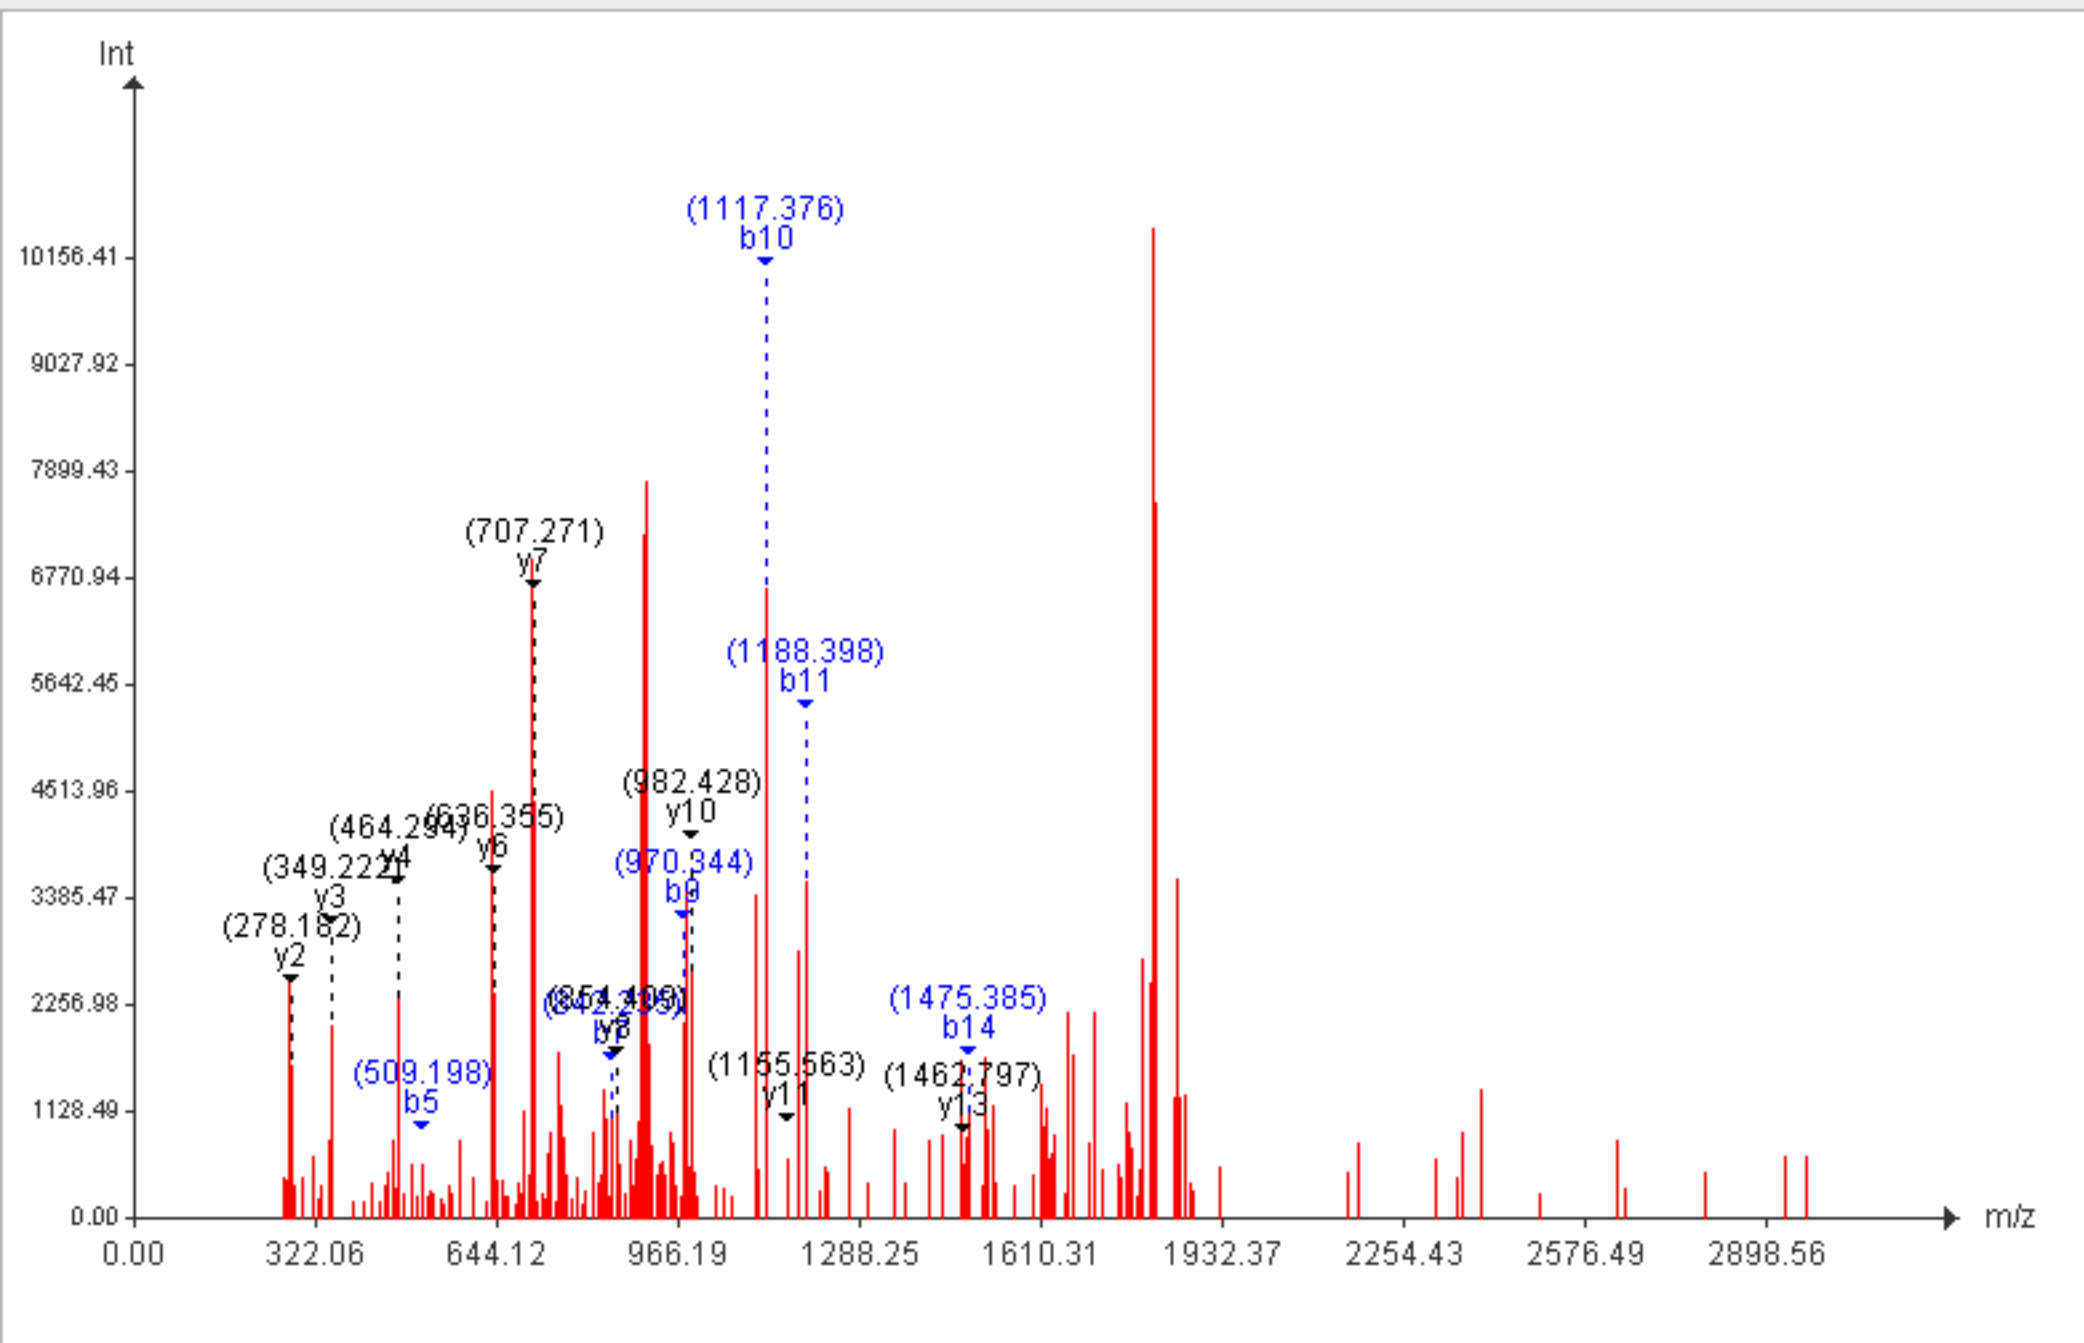

***AcD3-GTVEEDLGK(AcD3K\*)SR(C13\*)-COOH***  
**precursor mass: 643.8590 Da (charge: +2) protein: P08113 (29-39)**  
**score (threshold): 52.0 (31.0)**  
**instrument: Bruker Esquire HCT**

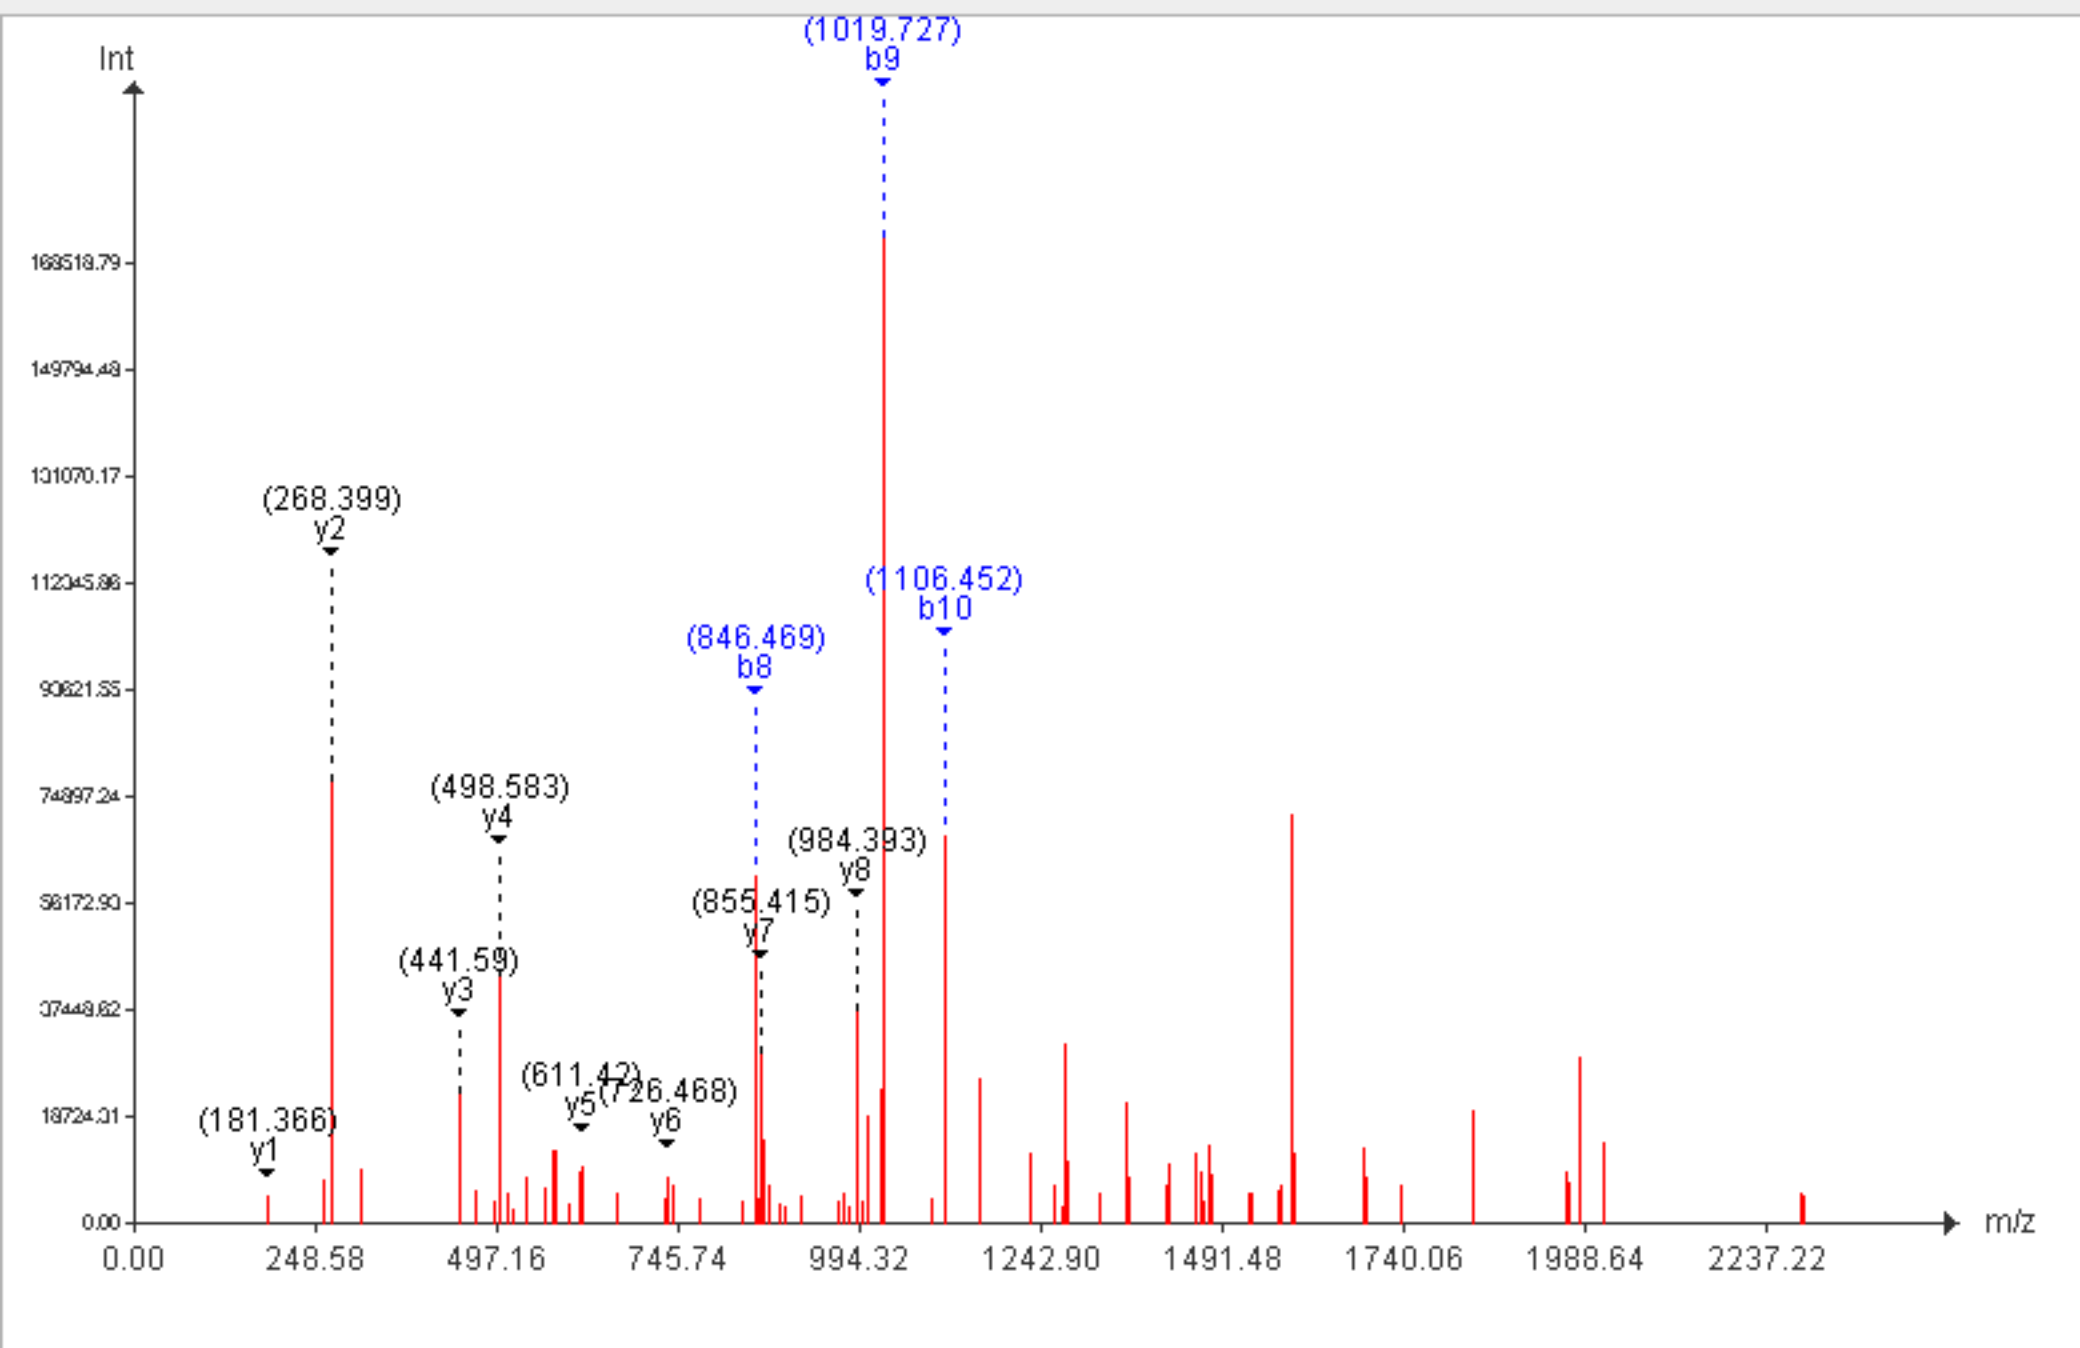

**AcD3-GTVEEDLGK(AcD3K\*)SR-COOH**  
**precursor mass: 640.7600 Da (charge: +2) protein: P08113 (29-39)**  
**score (threshold): 50.0 (31.0)**  
**instrument: Bruker Esquire HCT**

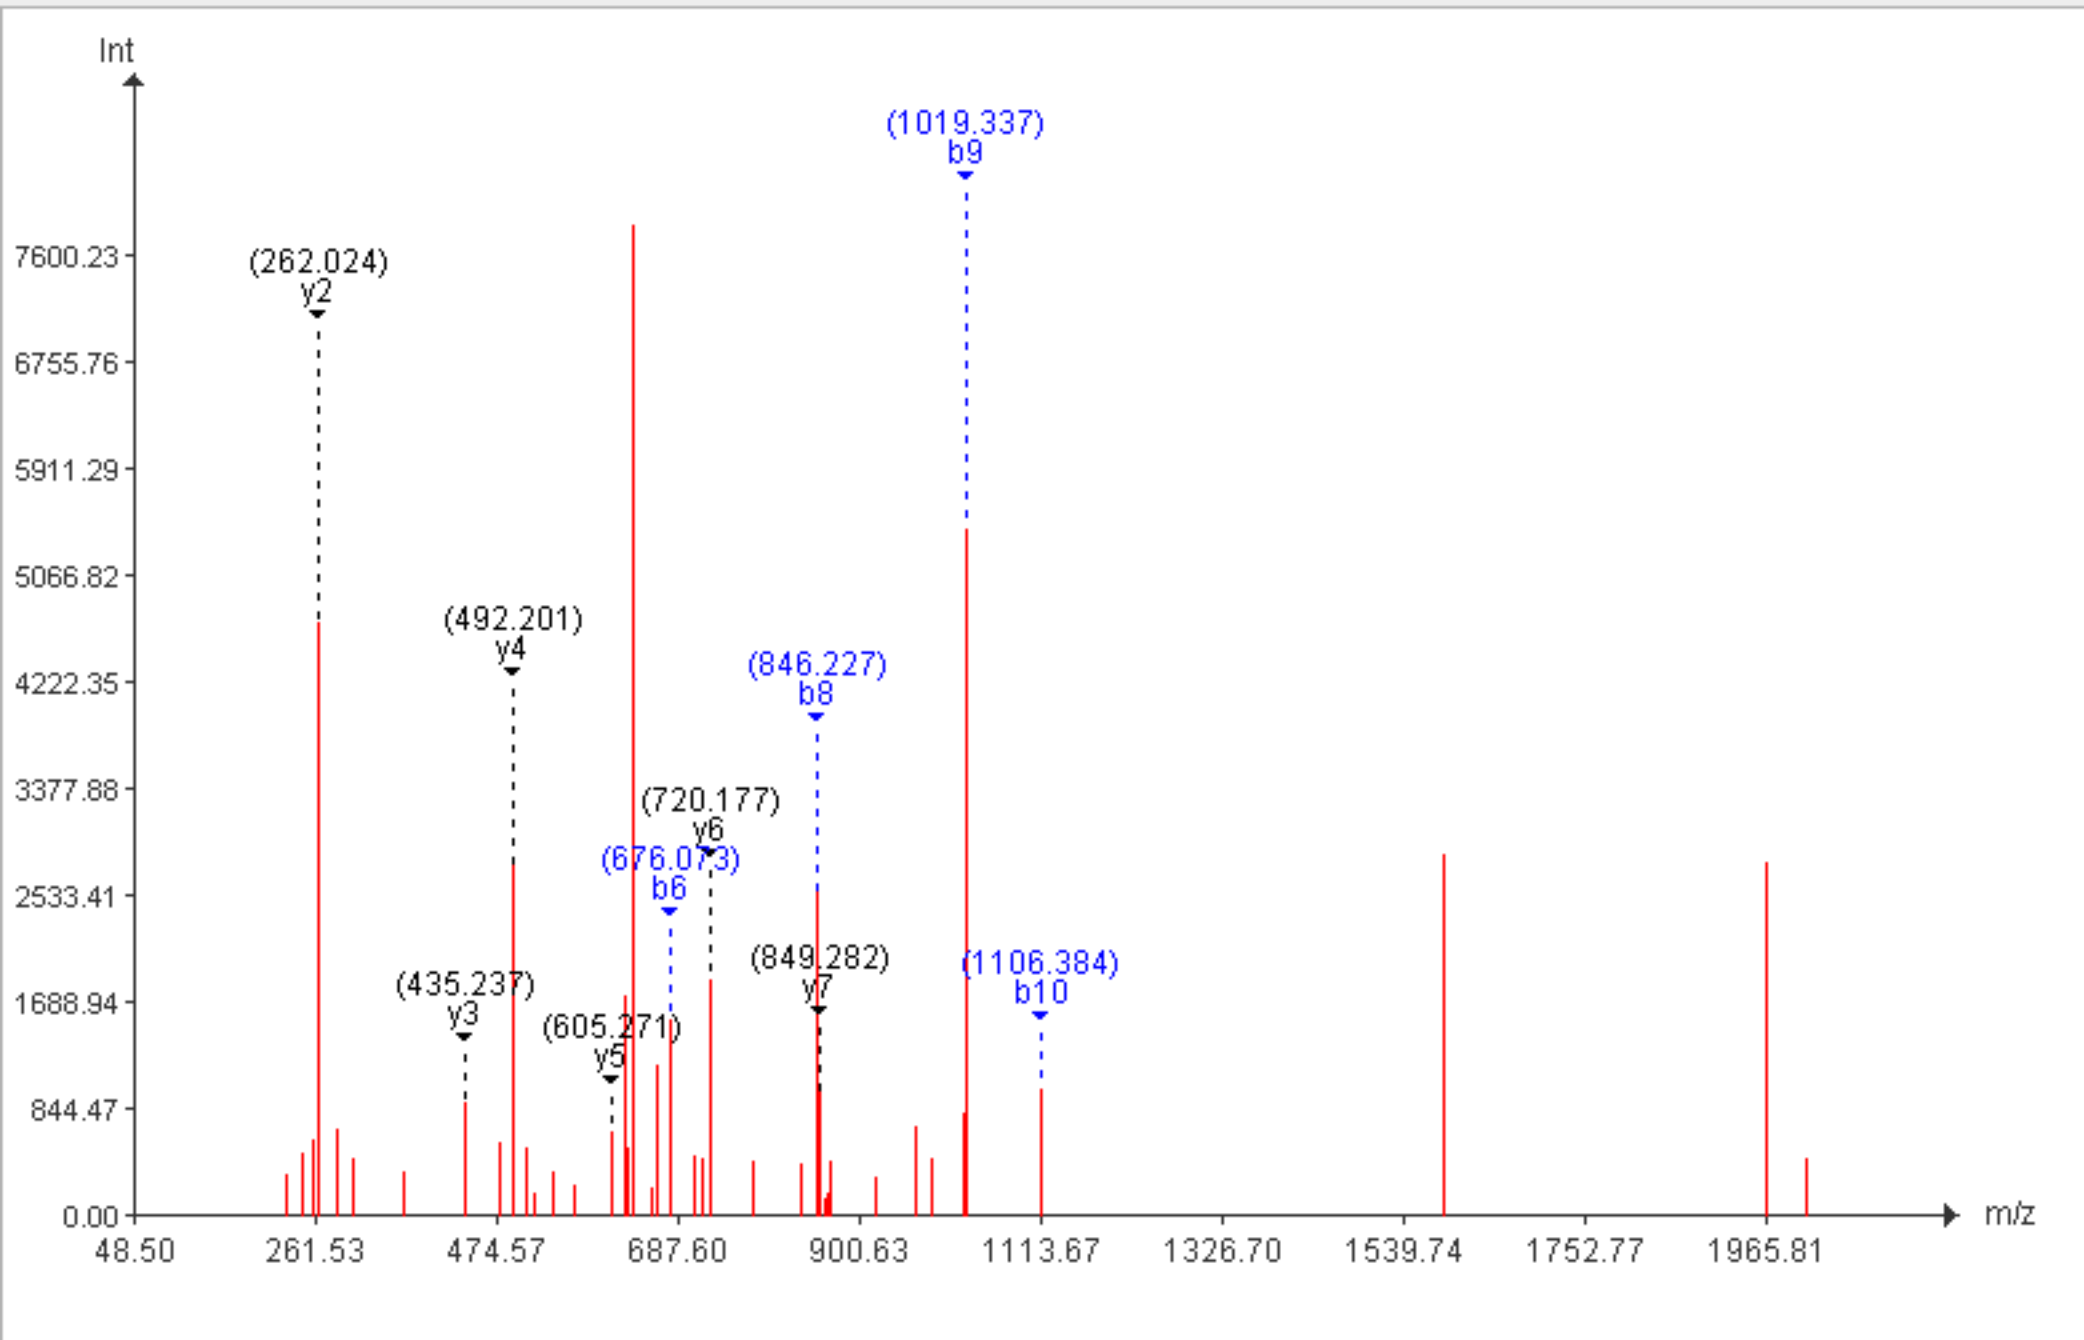



**AcD3-GTVEEDLGK(AcD3K\*)SR-COOH**  
**precursor mass: 640.7970 Da (charge: +2) protein: P08113 (29-39)**  
**score (threshold): 36.0 (31.0)**  
**instrument: Bruker Esquire HCT**

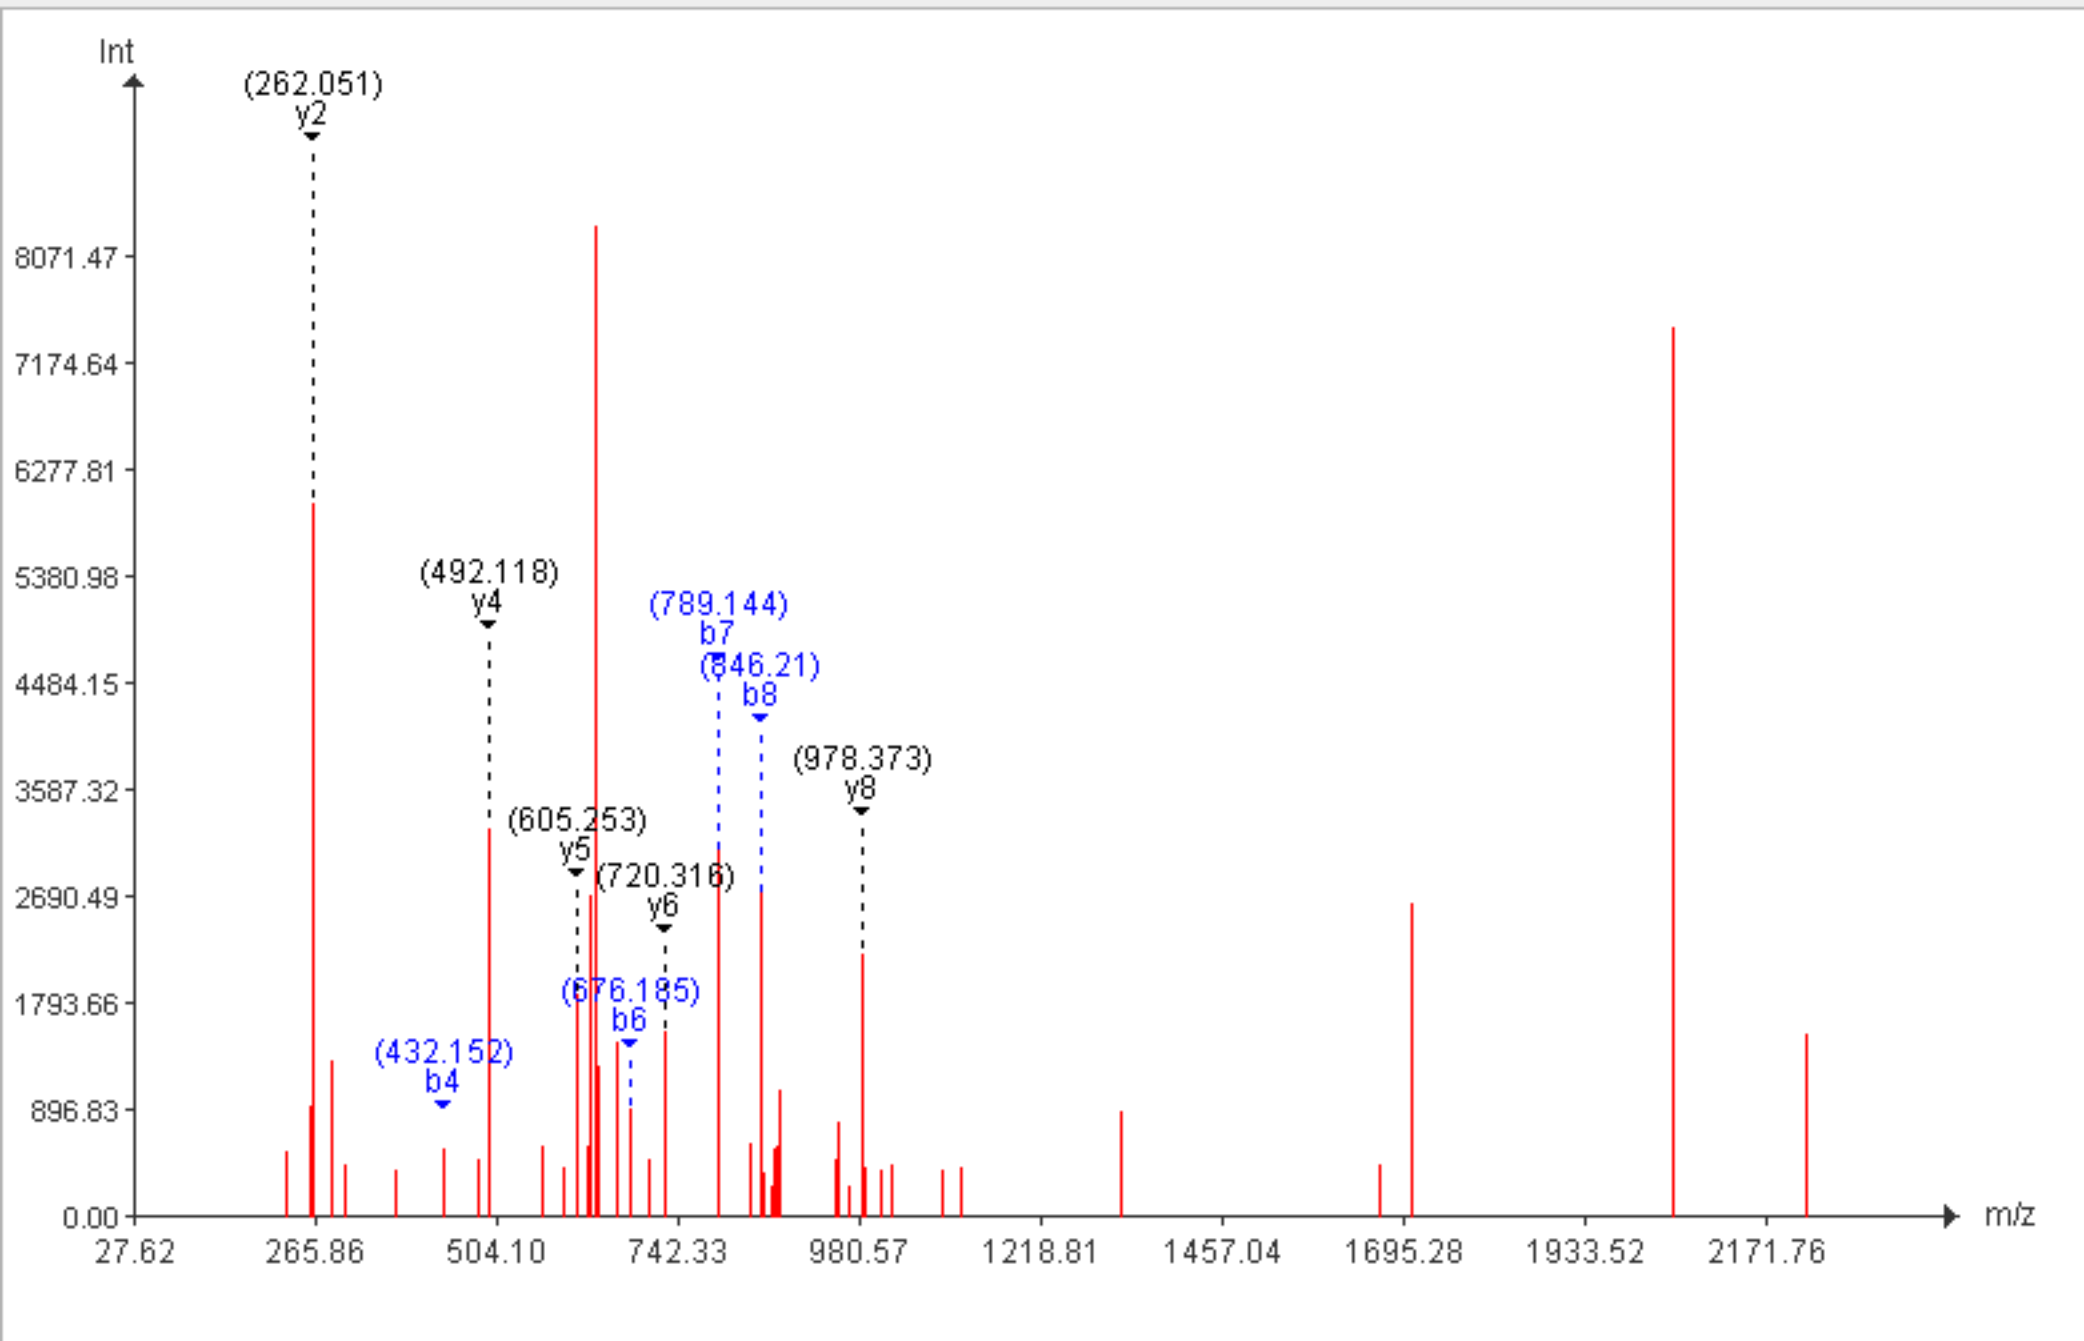

***AcD3-GTVEEDLGK(AcD3K\*)SR(C13\*)-COOH***  
**precursor mass: 643.7950 Da (charge: +2) protein: P08113 (29-39)**  
**score (threshold): 54.0 (31.0)**  
**instrument: Bruker Esquire HCT**

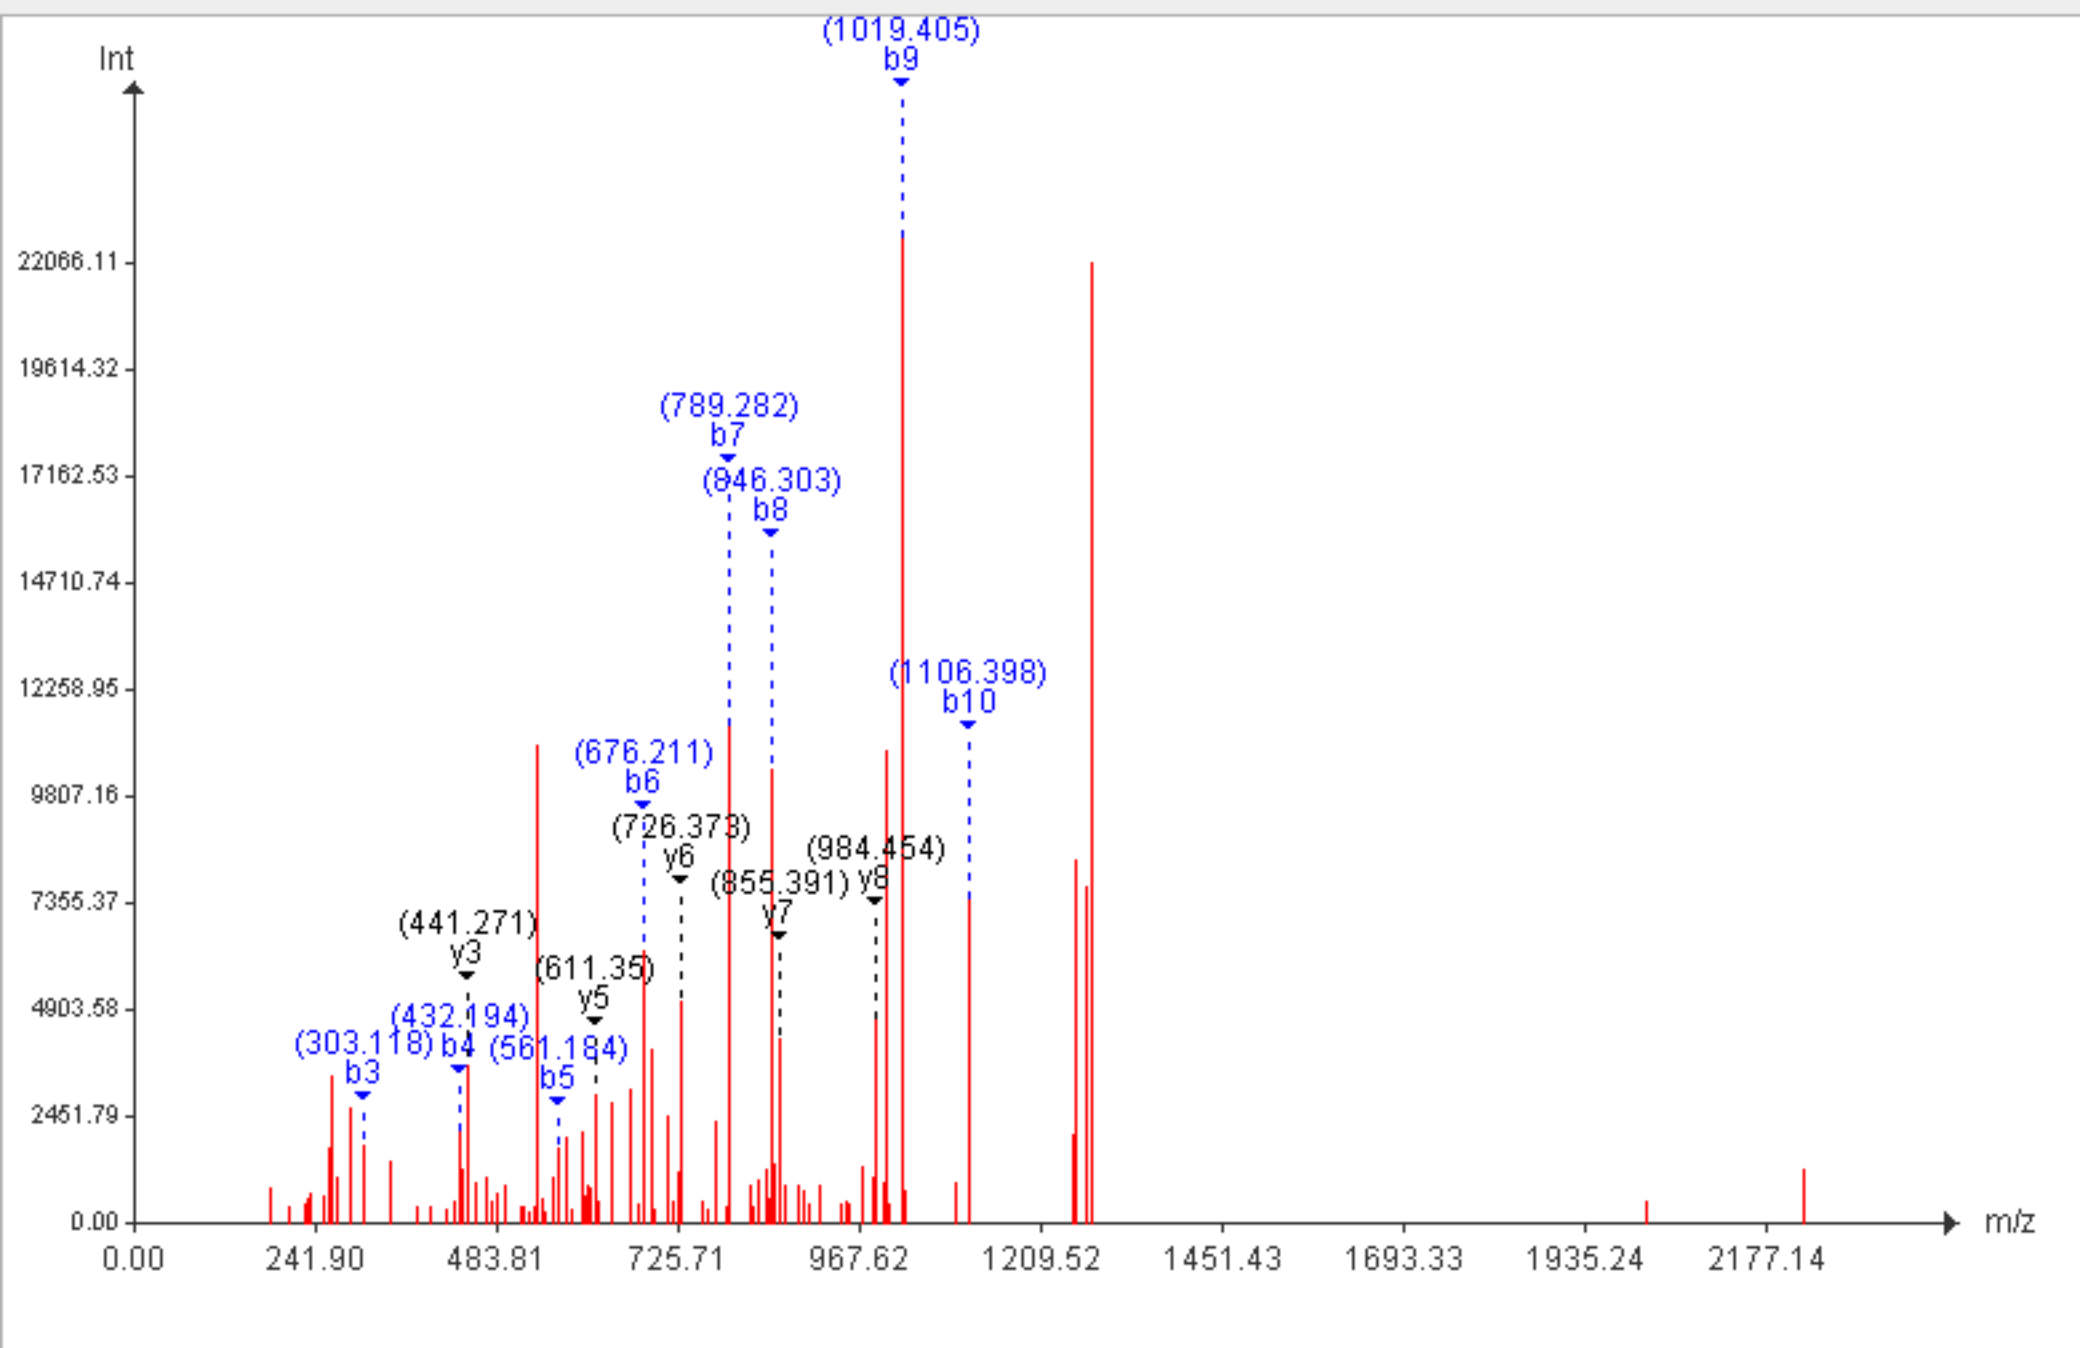

**AcD3-NGSGM(Mox)C(Cmm\*)K(AcD3K\*)AGFAGDDAPR(C13\*)-COOH**

precursor mass: 911.8890 Da (charge: +2) protein: P60710 (12-28)

score (threshold): 35.0 (31.0)

instrument: Bruker Esquire HCT

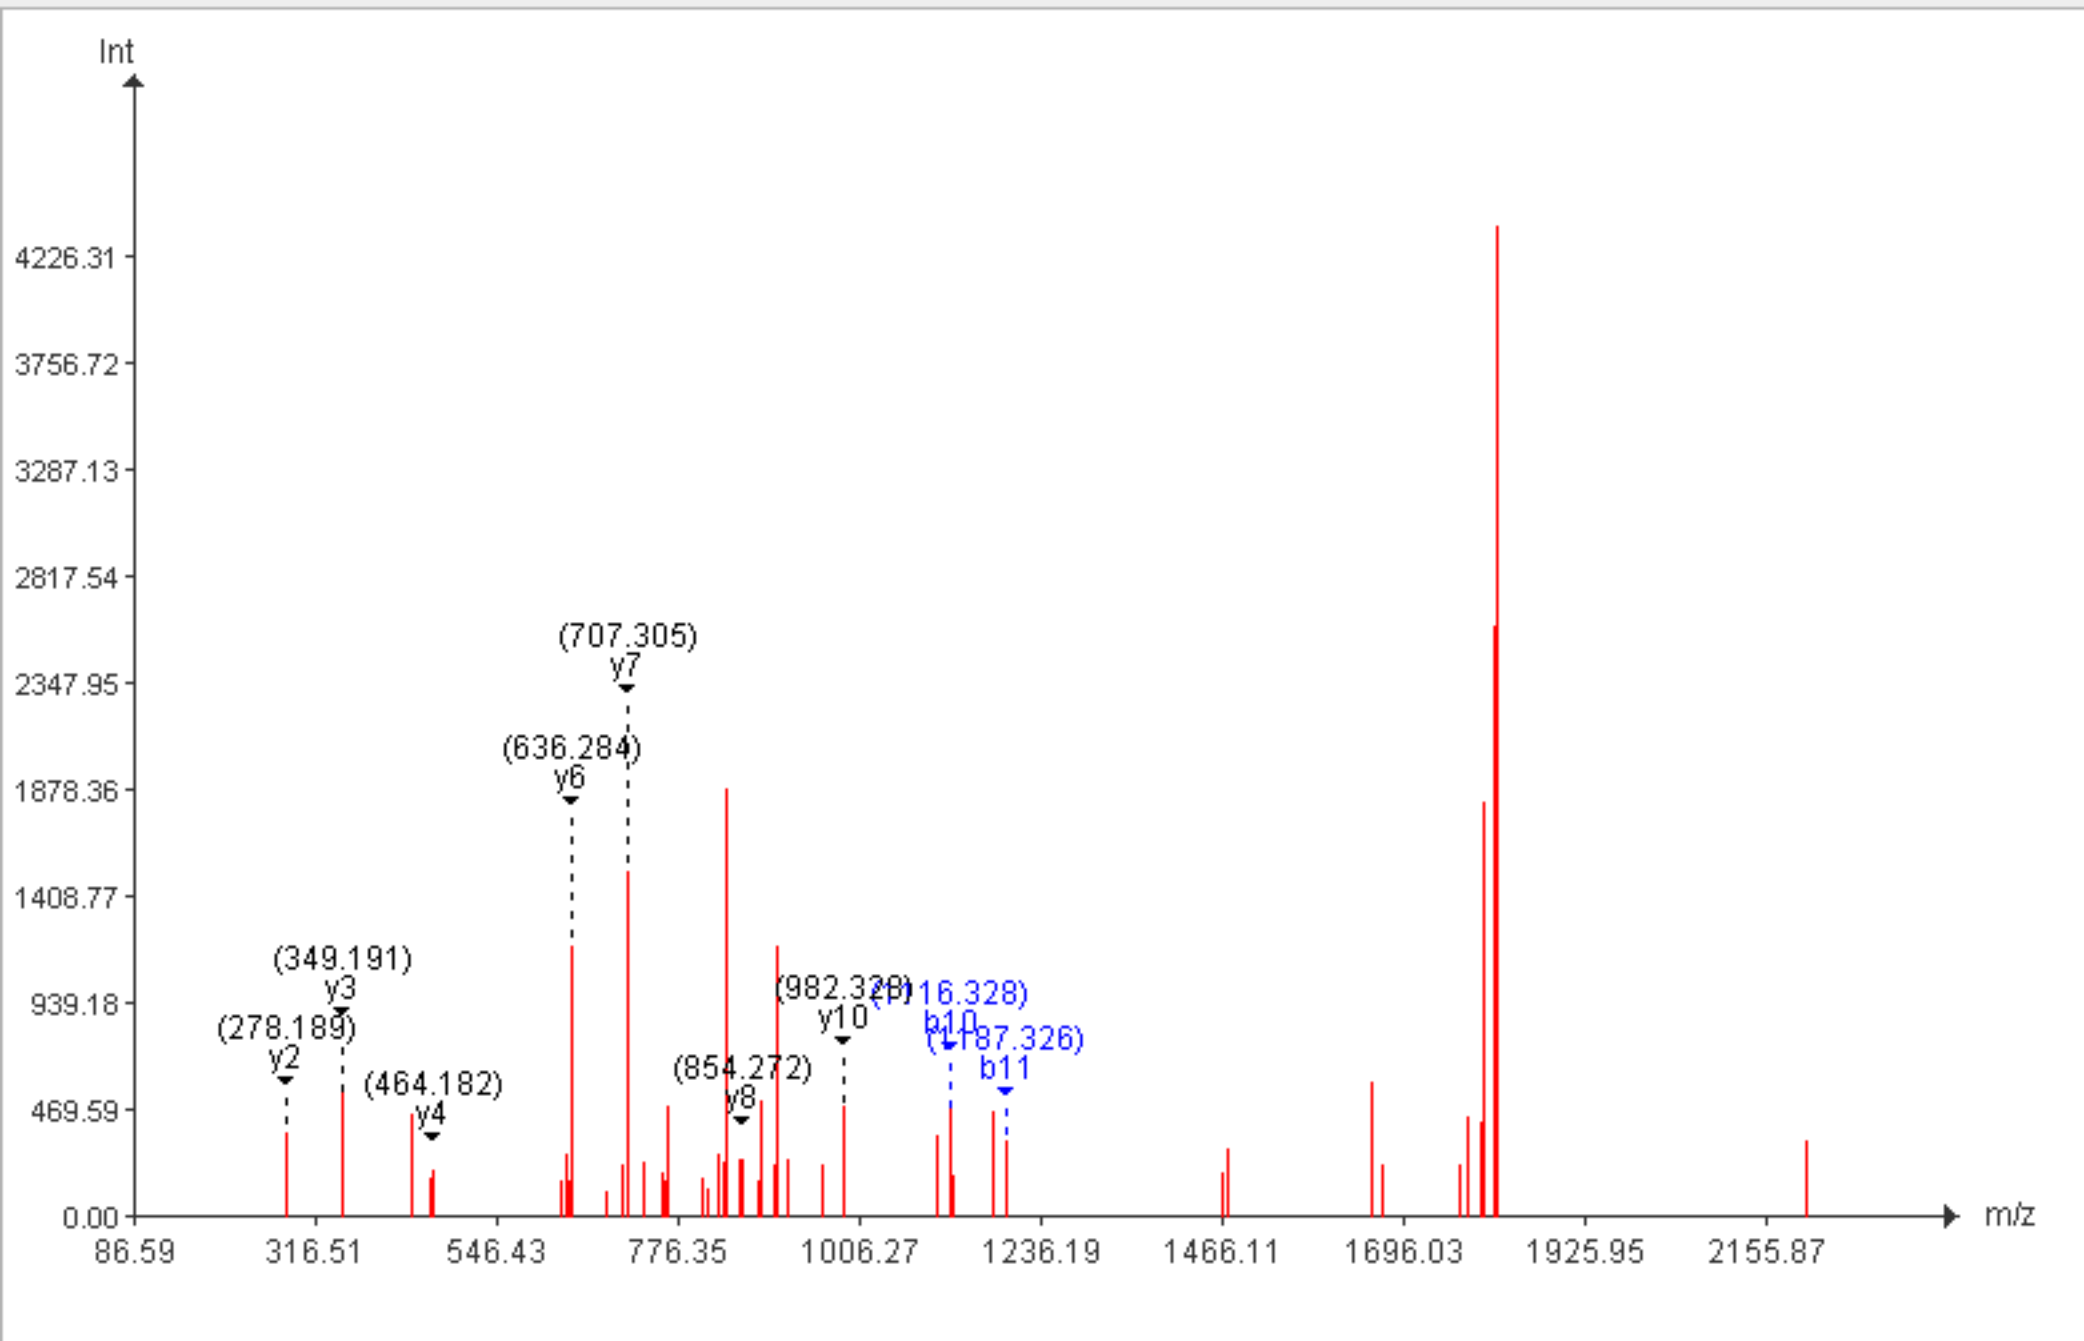

**AcD3-STAAQQLR(C13\*)-COOH**

**precursor mass: 527.7860 Da (charge: +2) protein: Q8VDD5 (1153-1161)**

**score (threshold): 65.0 (31.0)**

**instrument: Bruker Esquire HCT**

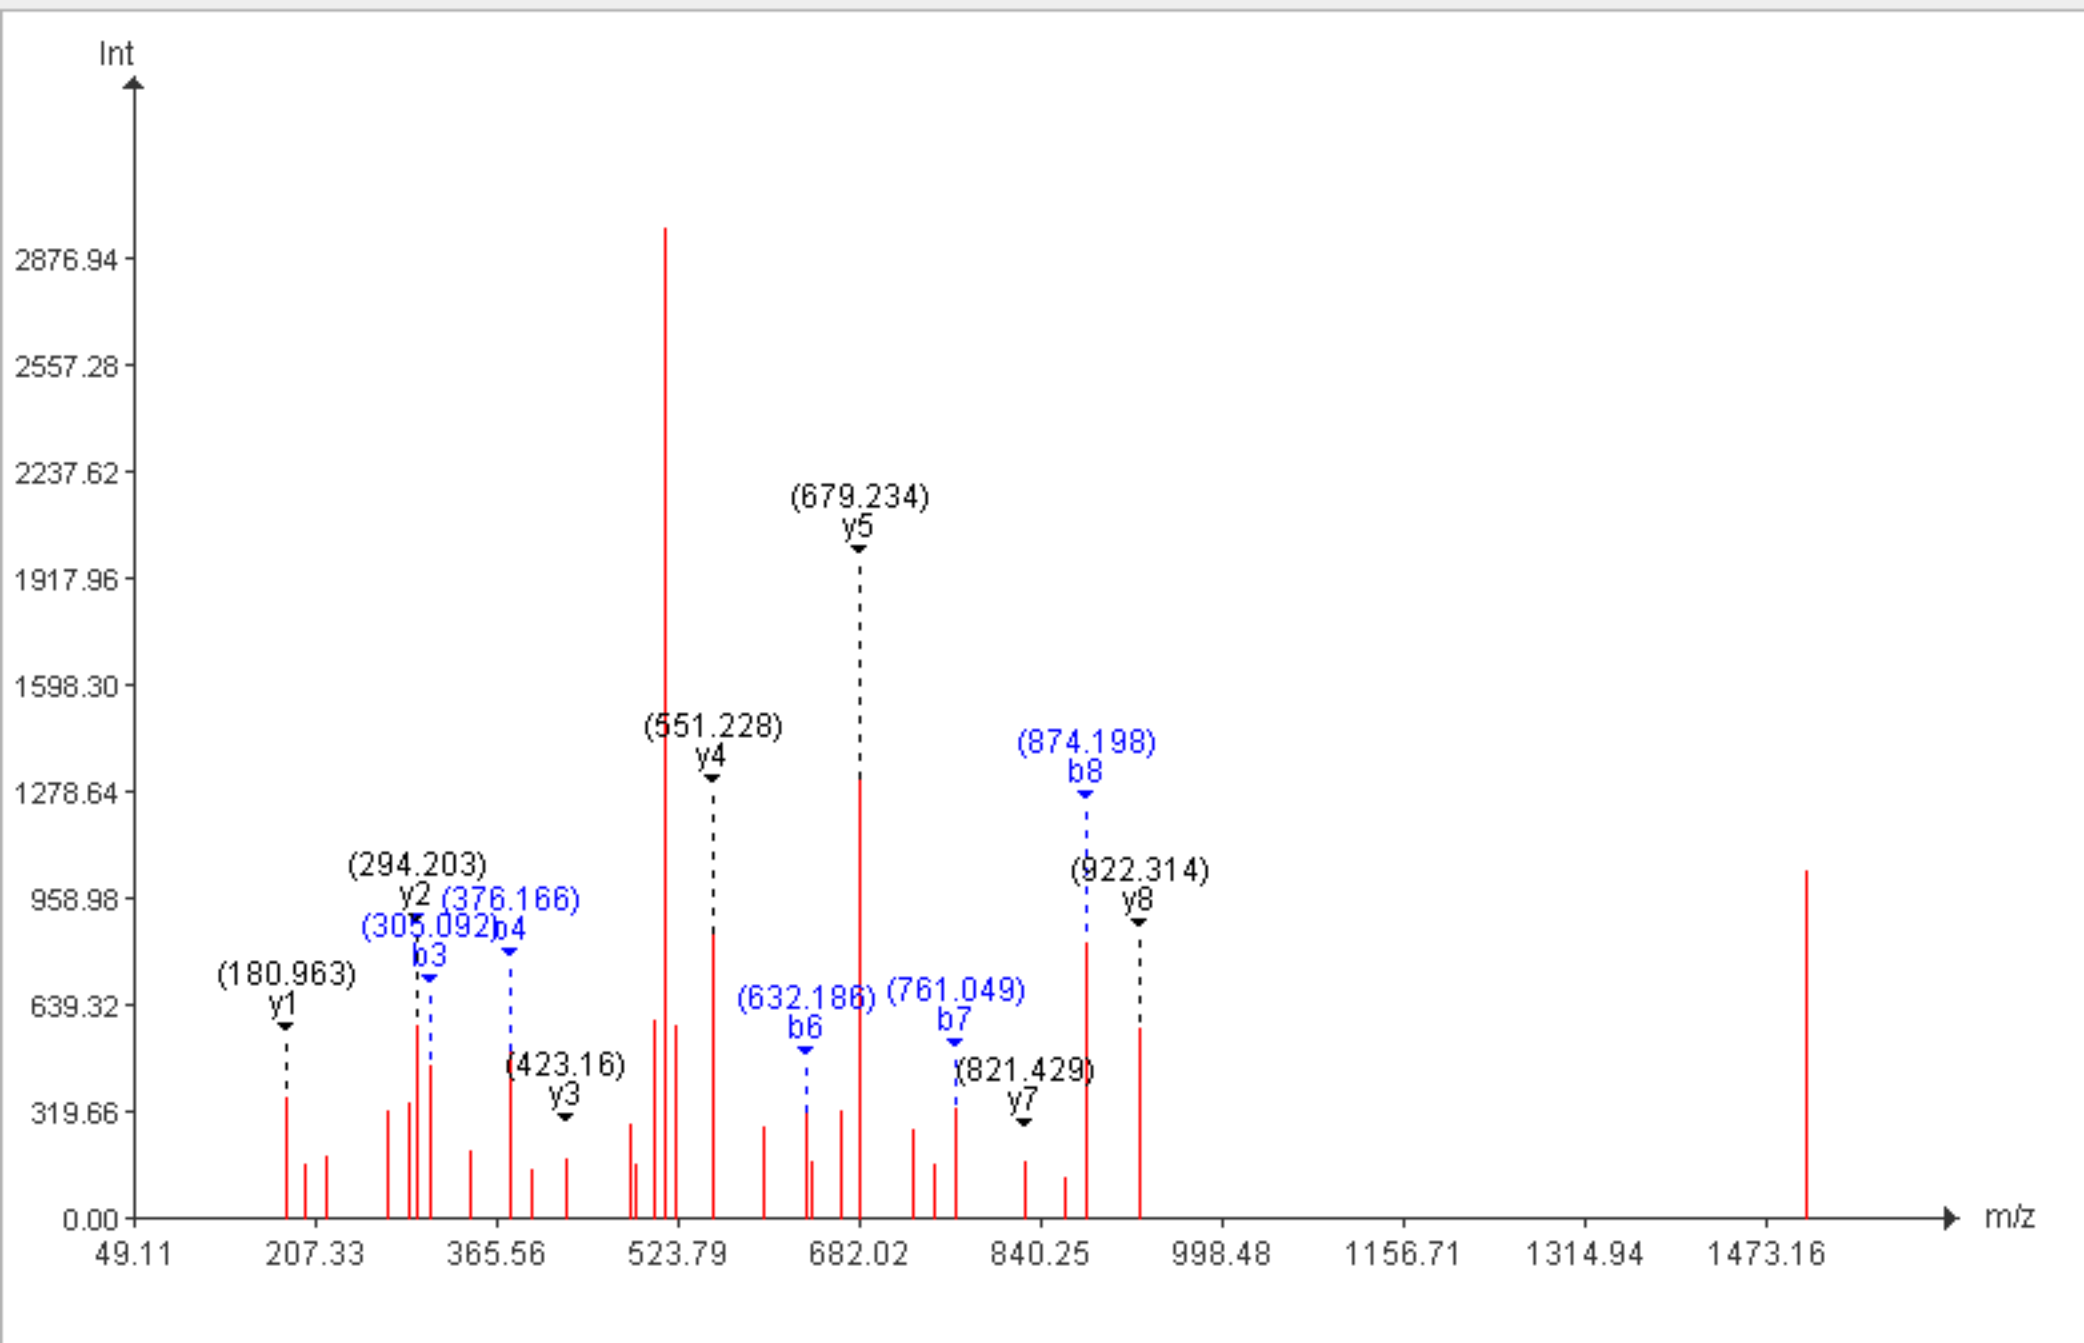

**AcD3-GGDGQAGPDEGEVDSC(Cmm\*)LR(C13\*)-COOH**  
**precursor mass: 935.4020 Da (charge: +2) protein: Q9CPW4 (29-46)**  
**score (threshold): 58.0 (36.0)**  
**instrument: Bruker Esquire HCT**

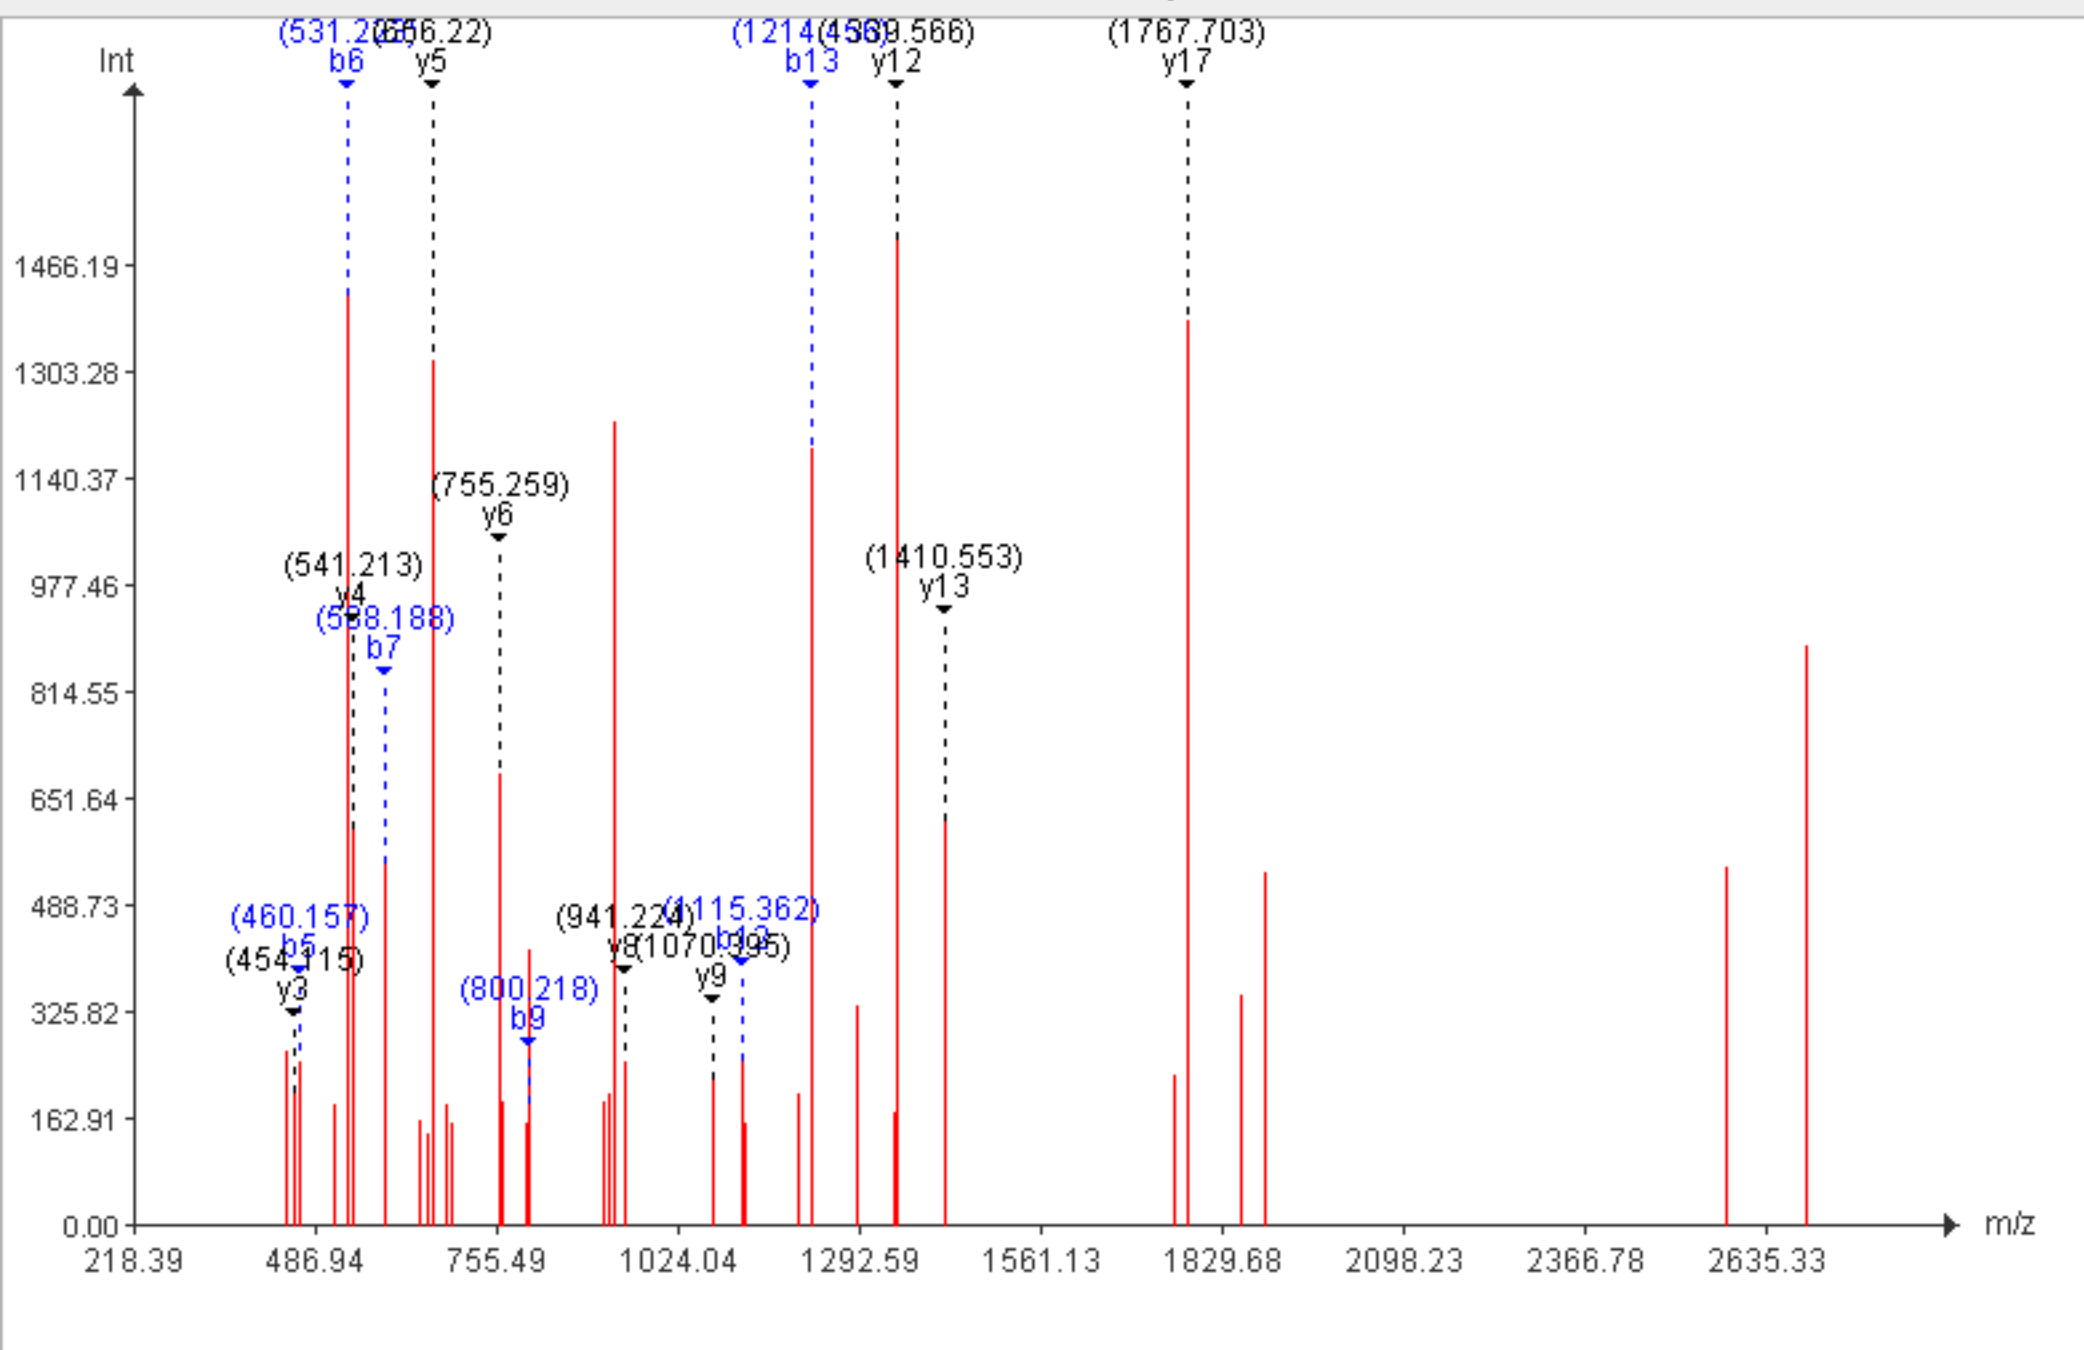

**AcD3-GEEQAEK(AcD3K\*)TK(AcD3K\*)GK(AcD3K\*)R-COOH**  
**precursor mass: 770.9520 Da (charge: +2) protein: O88271 (41-52)**  
**score (threshold): 49.0 (31.0)**  
**instrument: Bruker Esquire HCT**

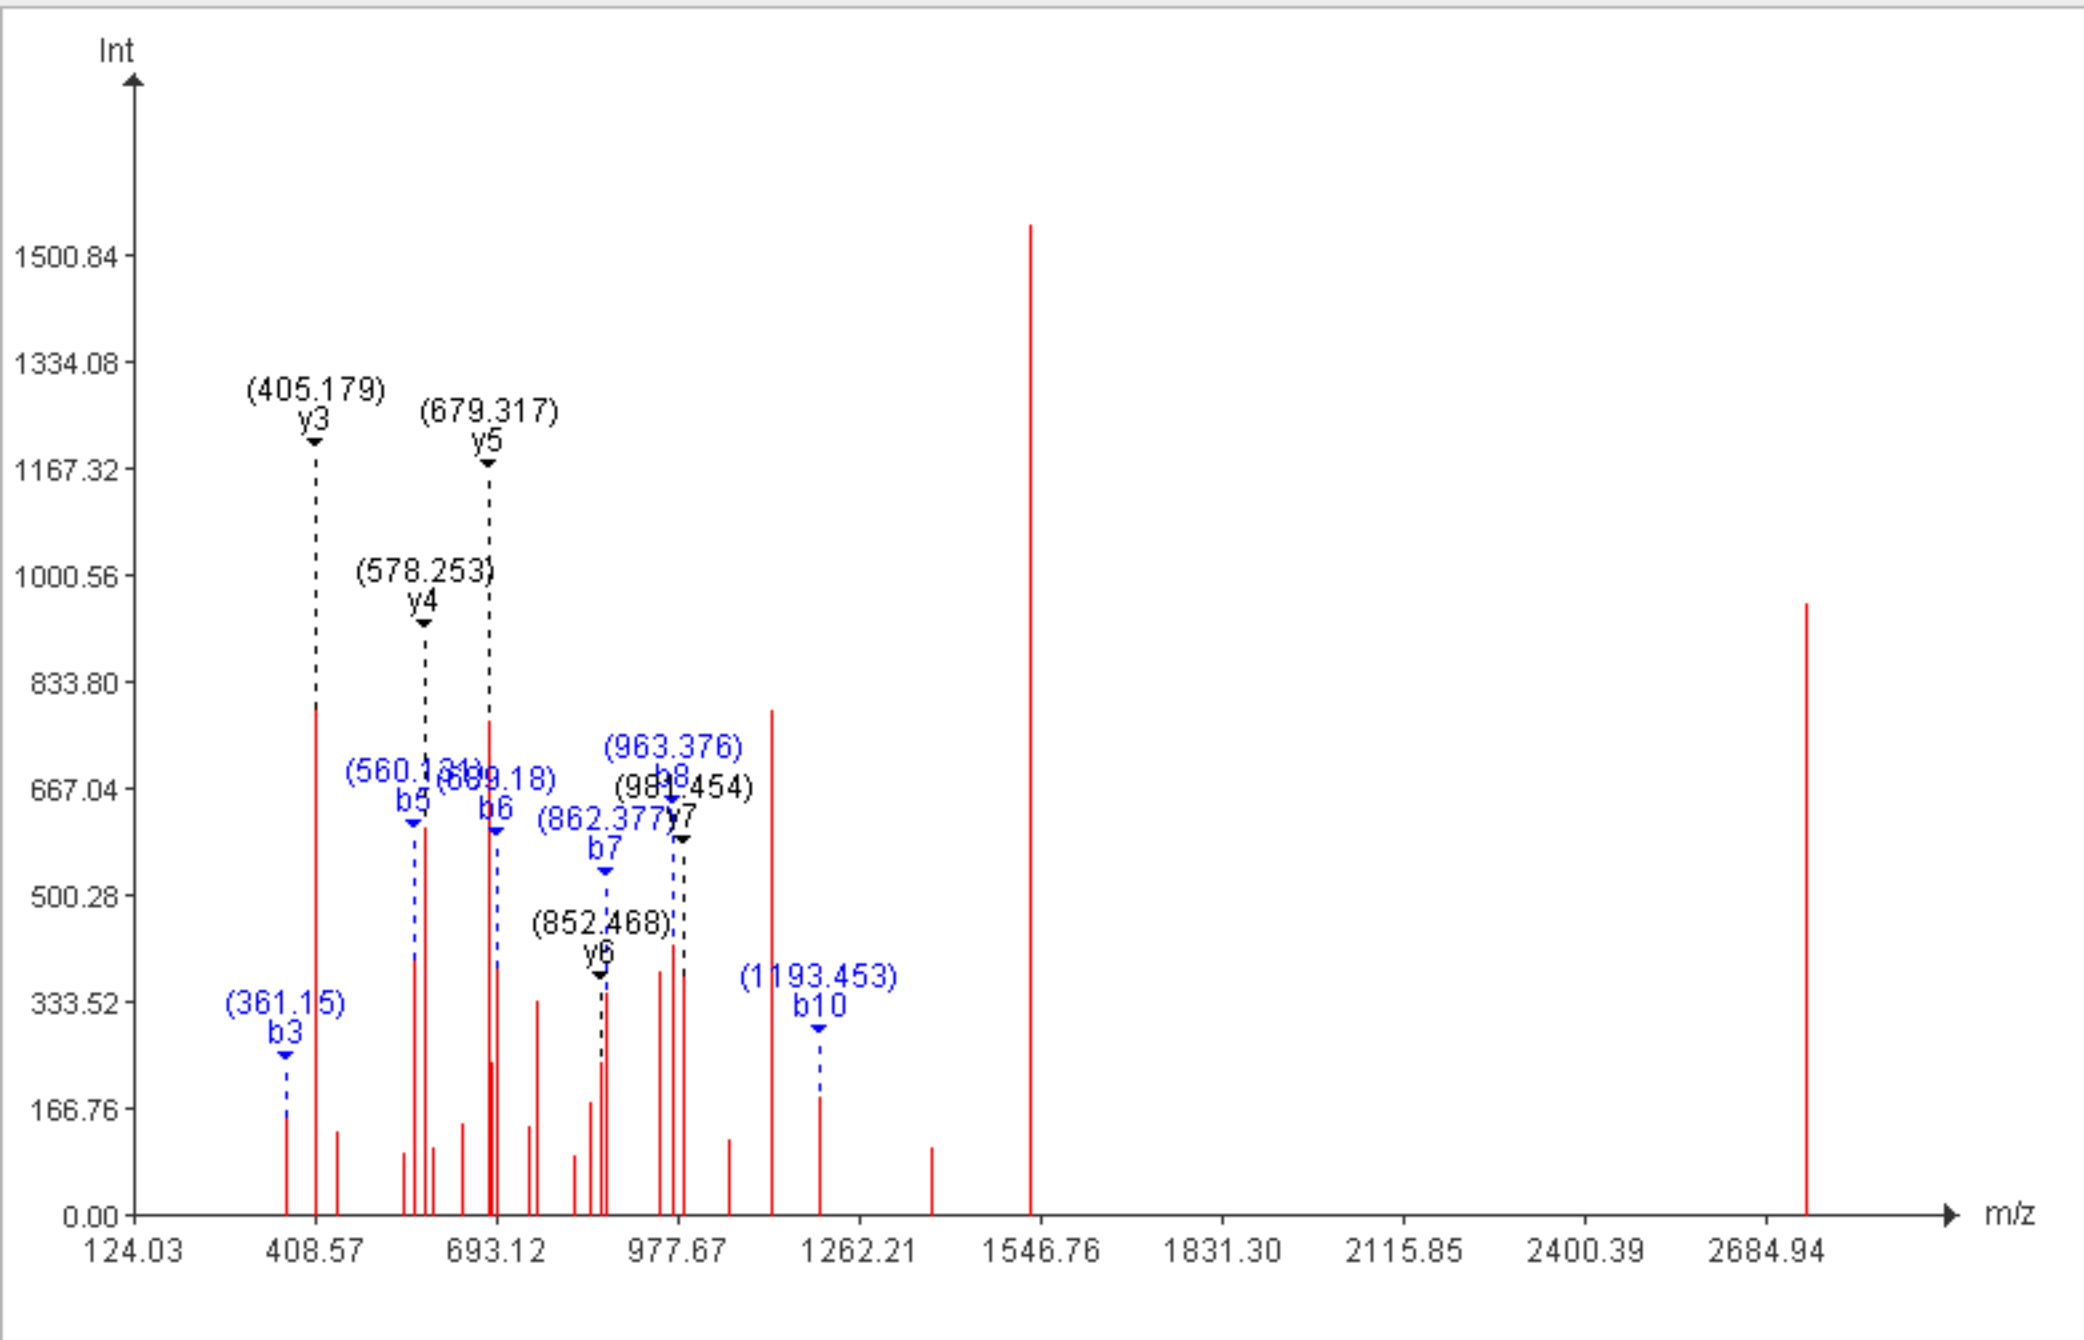

***AcD3-AK(AcD3K\*)AEEEFNIEK(AcD3K\*)GR-COOH***  
**precursor mass: 828.4880 Da (charge: +2) protein: P50518 (33-45)**  
**score (threshold): 38.0 (31.0)**  
**instrument: Bruker Esquire HCT**

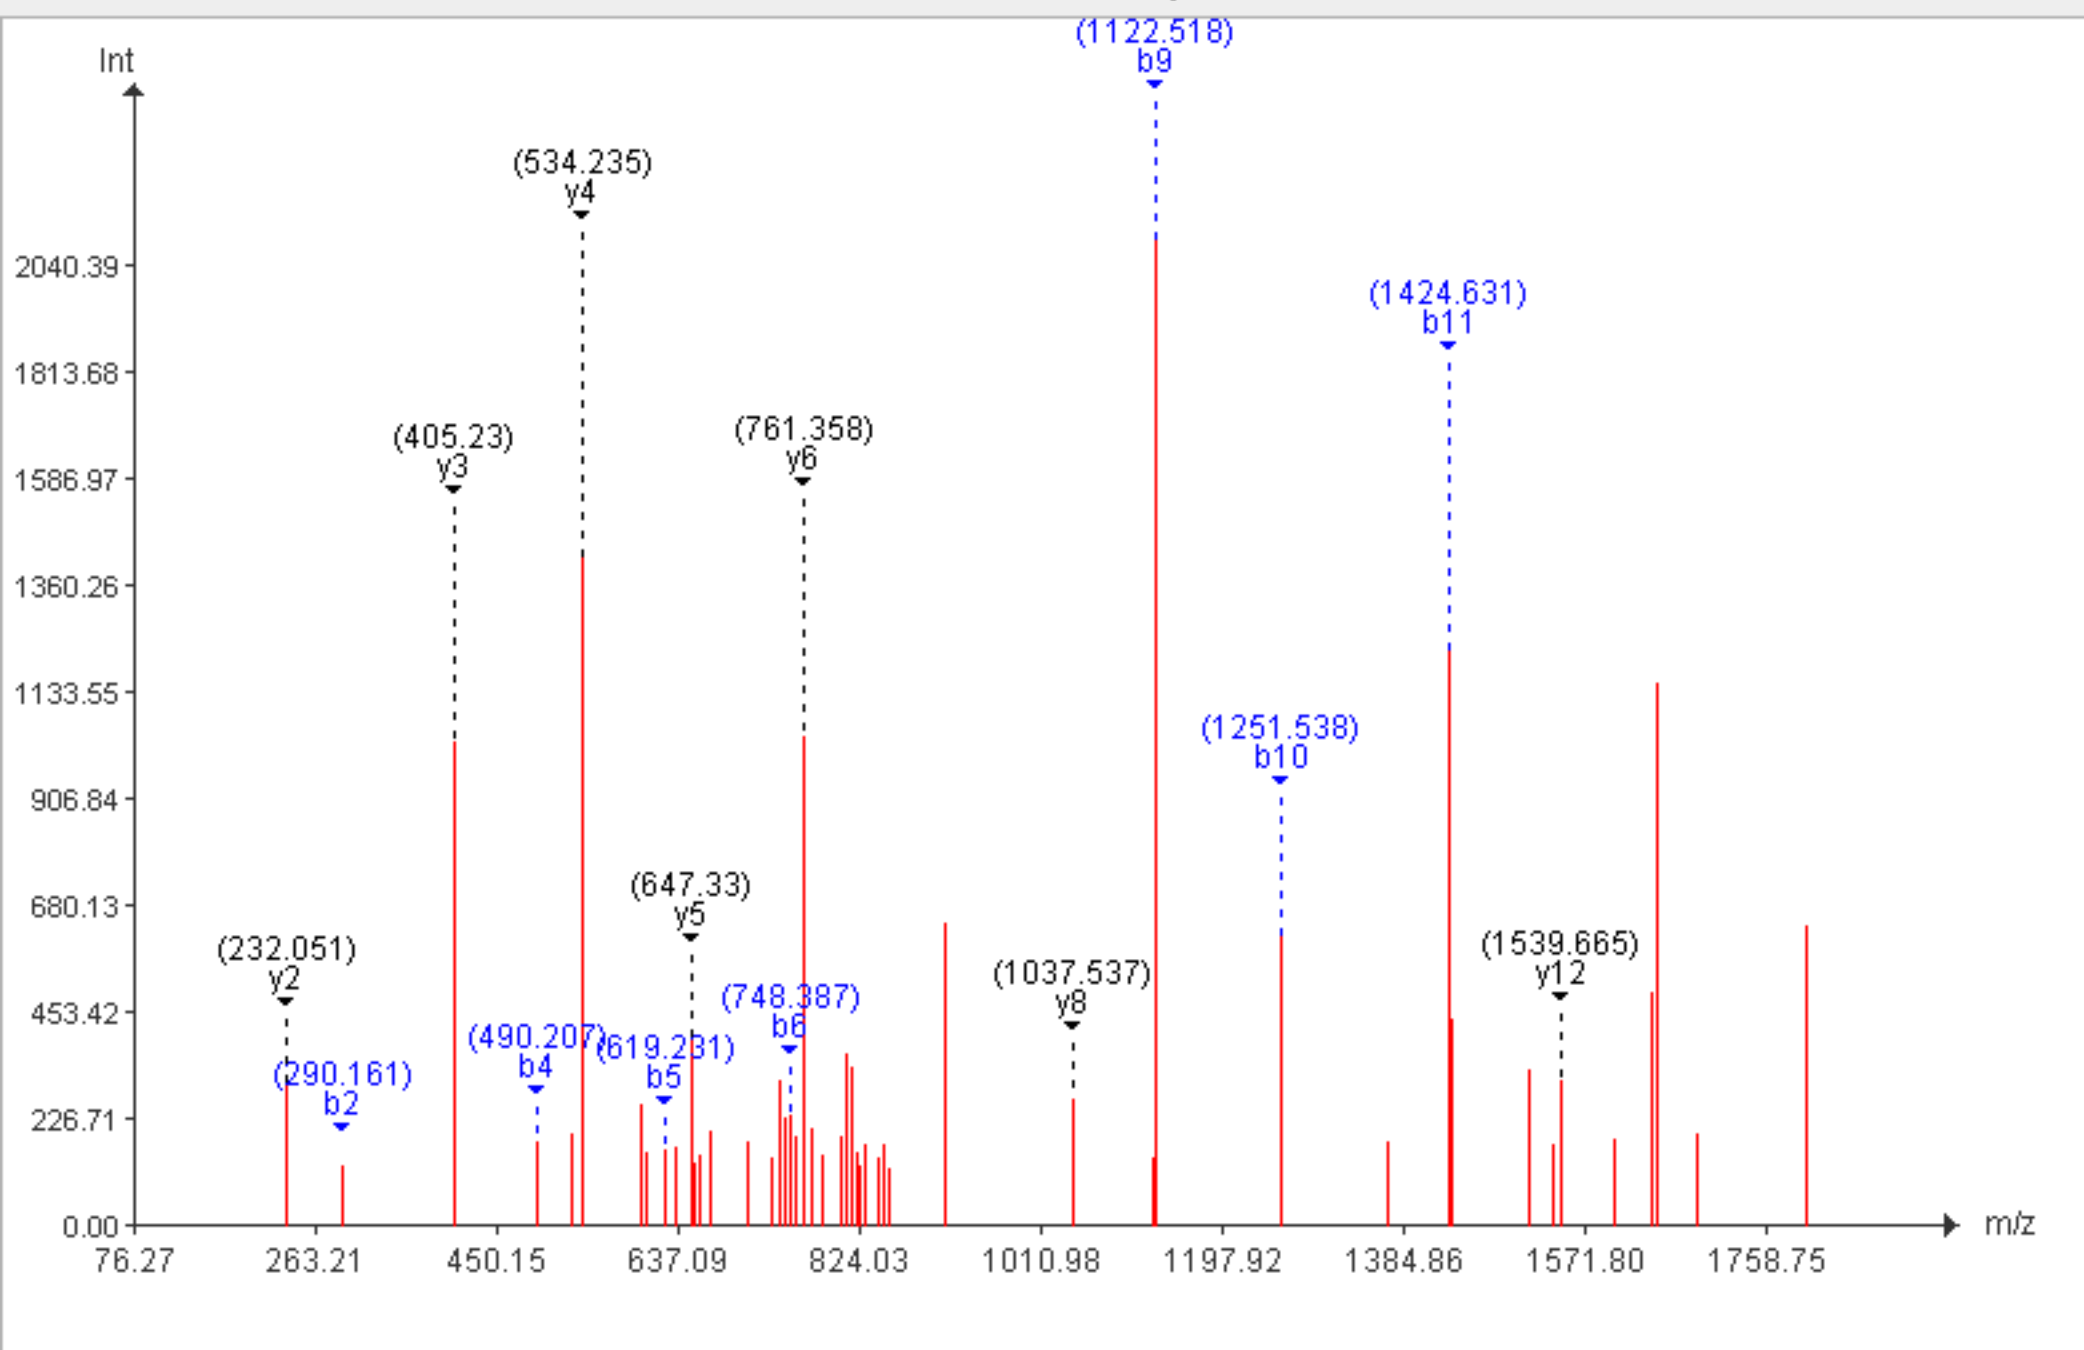

**AcD3-AEAAM(Mox)DISEGR(C13\*)-COOH**  
**precursor mass: 608.7880 Da (charge: +2) protein: P56399 (768-778)**  
**score (threshold): 78.0 (31.0)**  
**instrument: Bruker Esquire HCT**

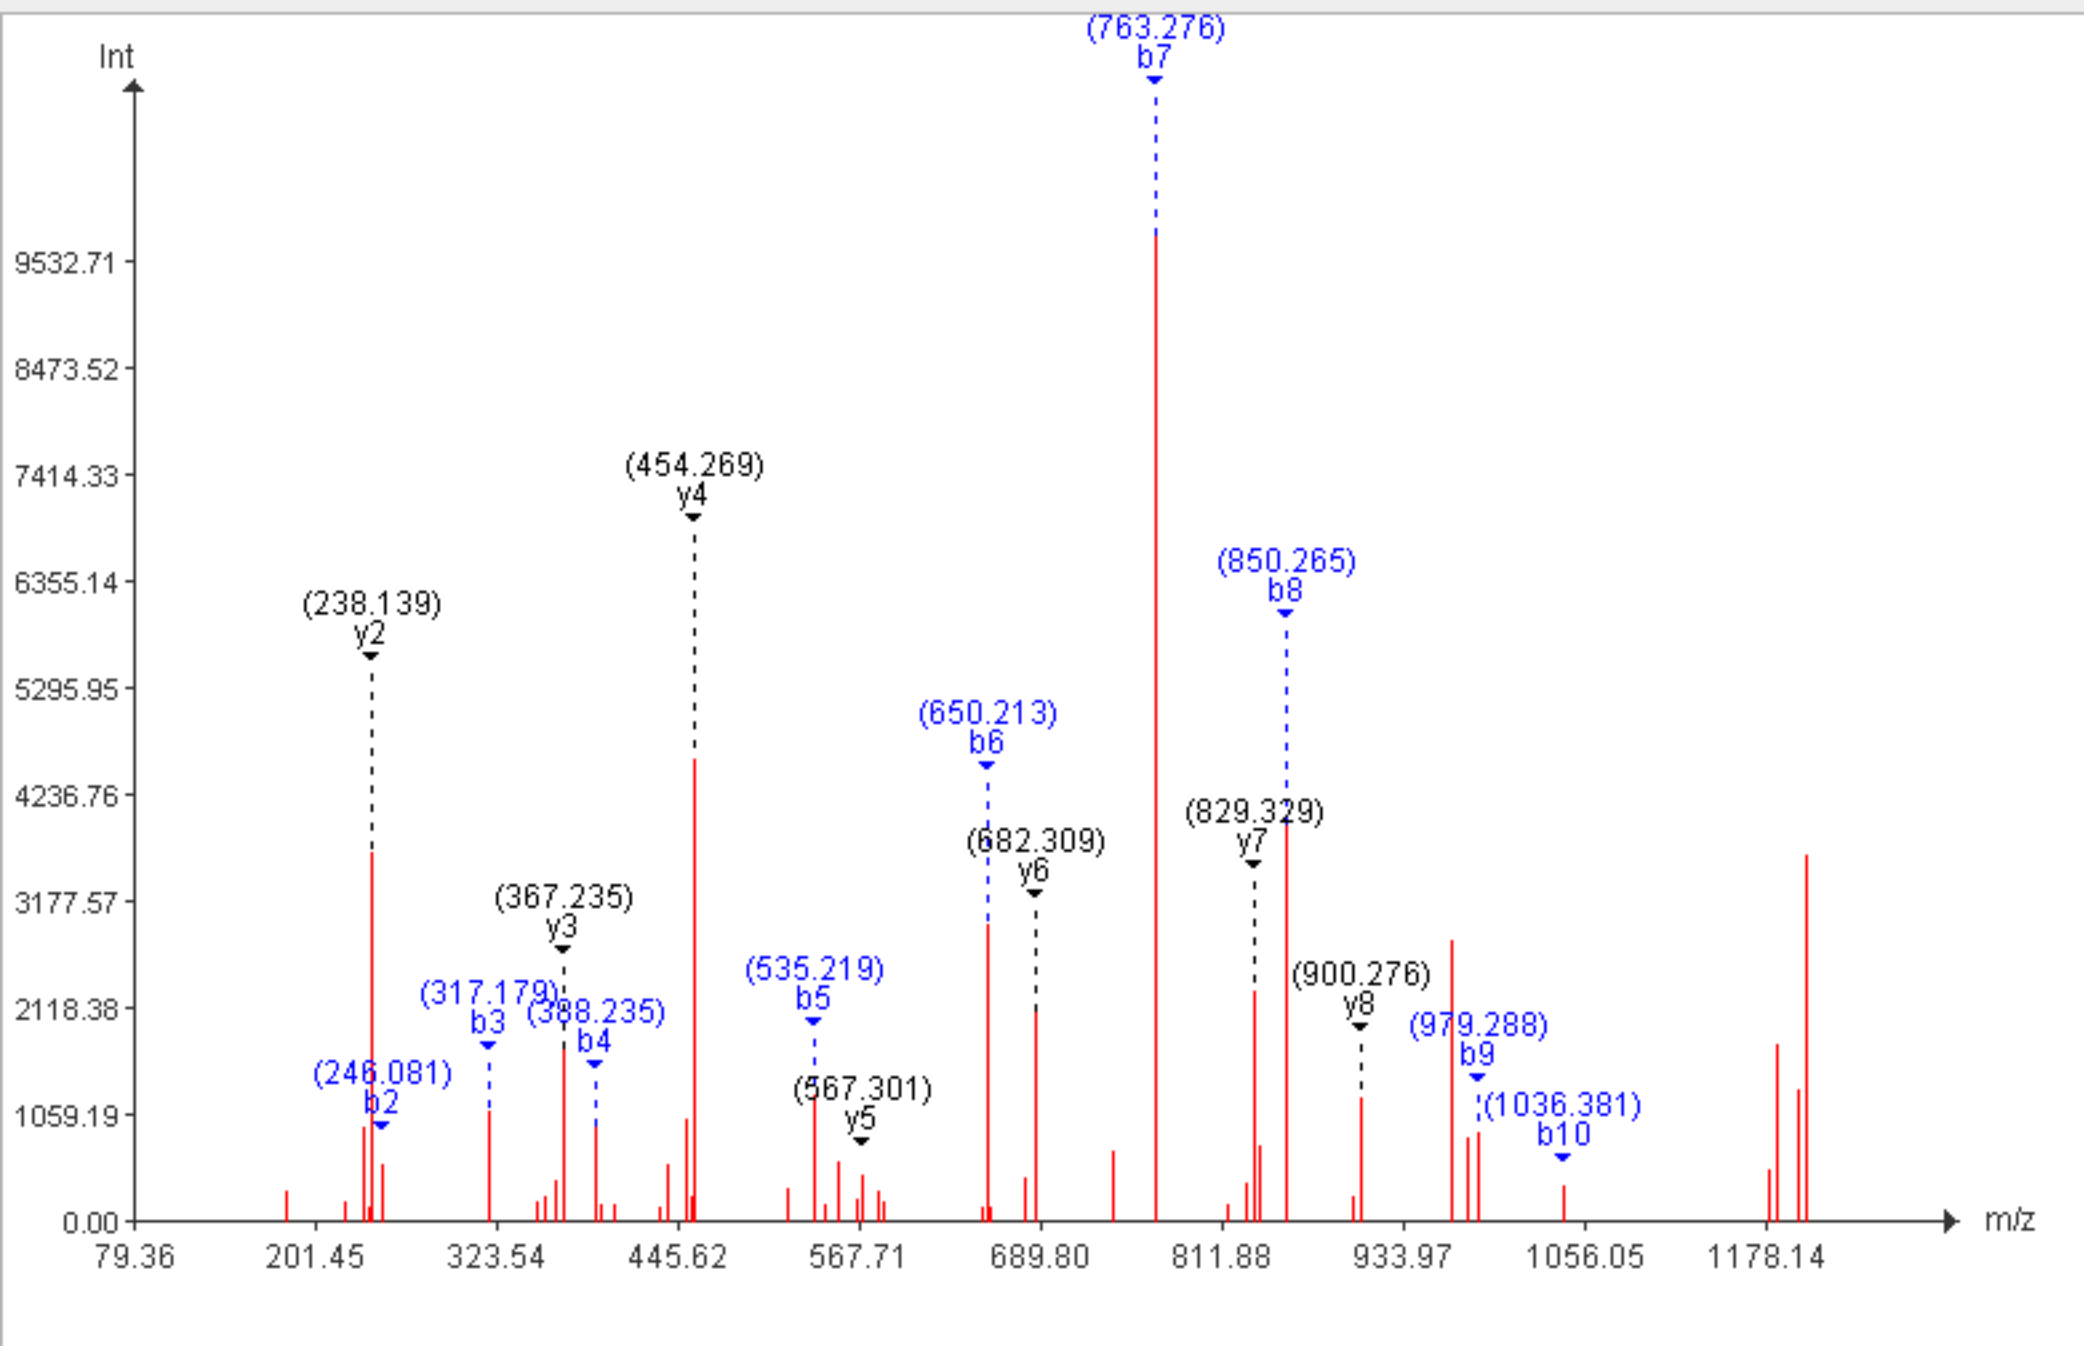



**AcD3-GGDGQAGPDEGEVDSC(Cmm\*)LR(C13\*)-COOH**  
**precursor mass: 935.3860 Da (charge: +2) protein: Q9CPW4 (29-46)**  
**score (threshold): 58.0 (31.0)**  
**instrument: Bruker Esquire HCT**

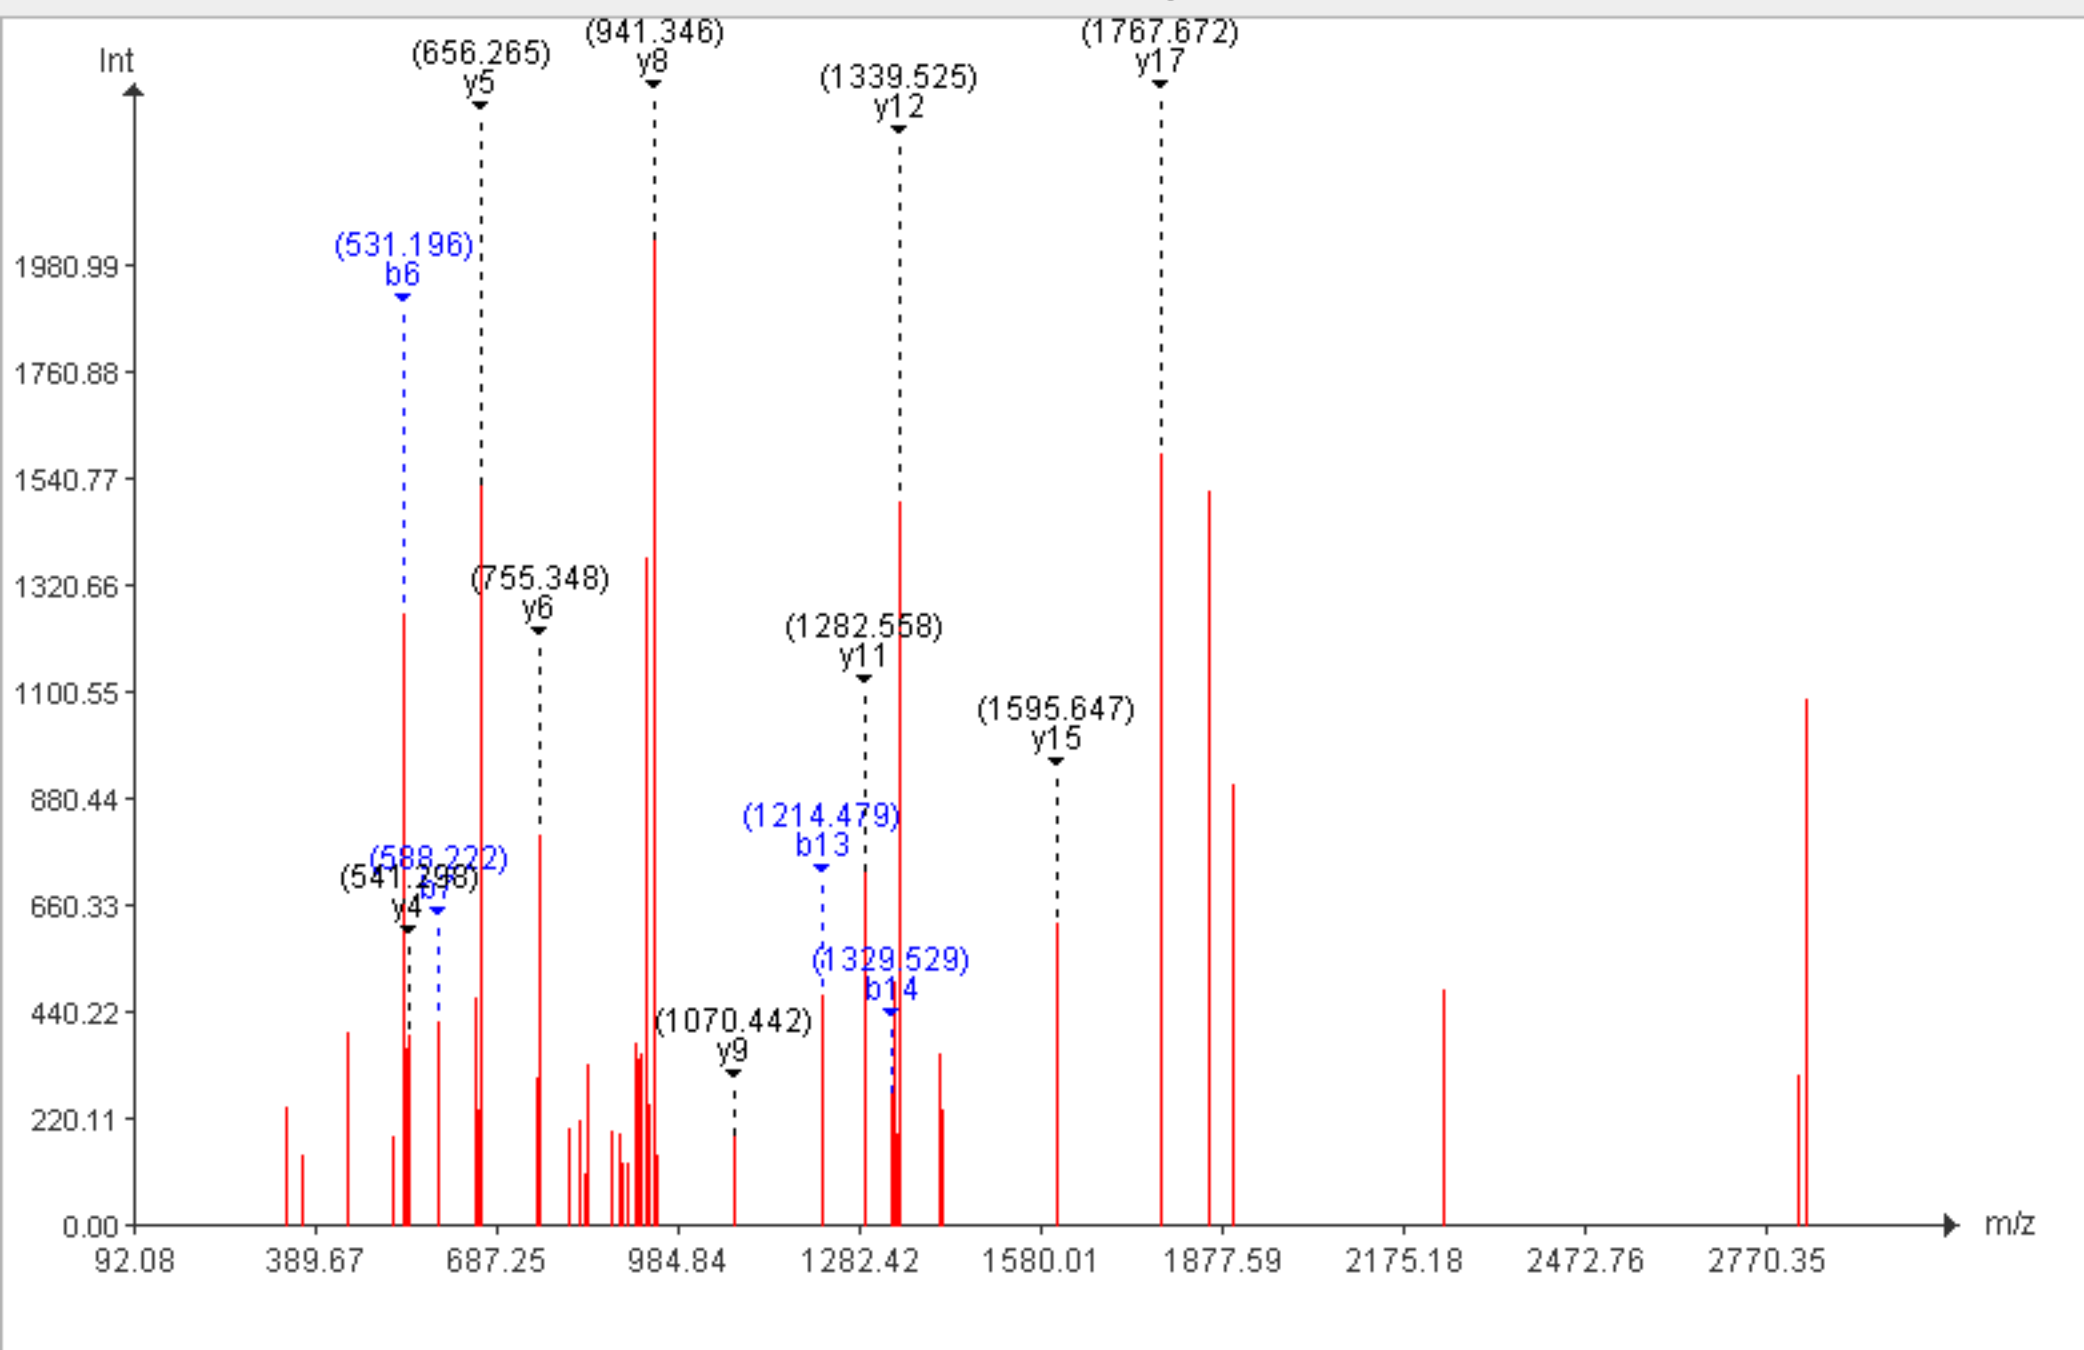

**AcD3-FSQLLNC(Cmm\*)PEFVPR(C13\*)-COOH**  
**precursor mass: 829.4267 Da (charge: +2) protein: Q3UU34 (298-310)**  
**score (threshold): 59.0 (32.0)**  
**instrument: Waters Q-TOF Premier**

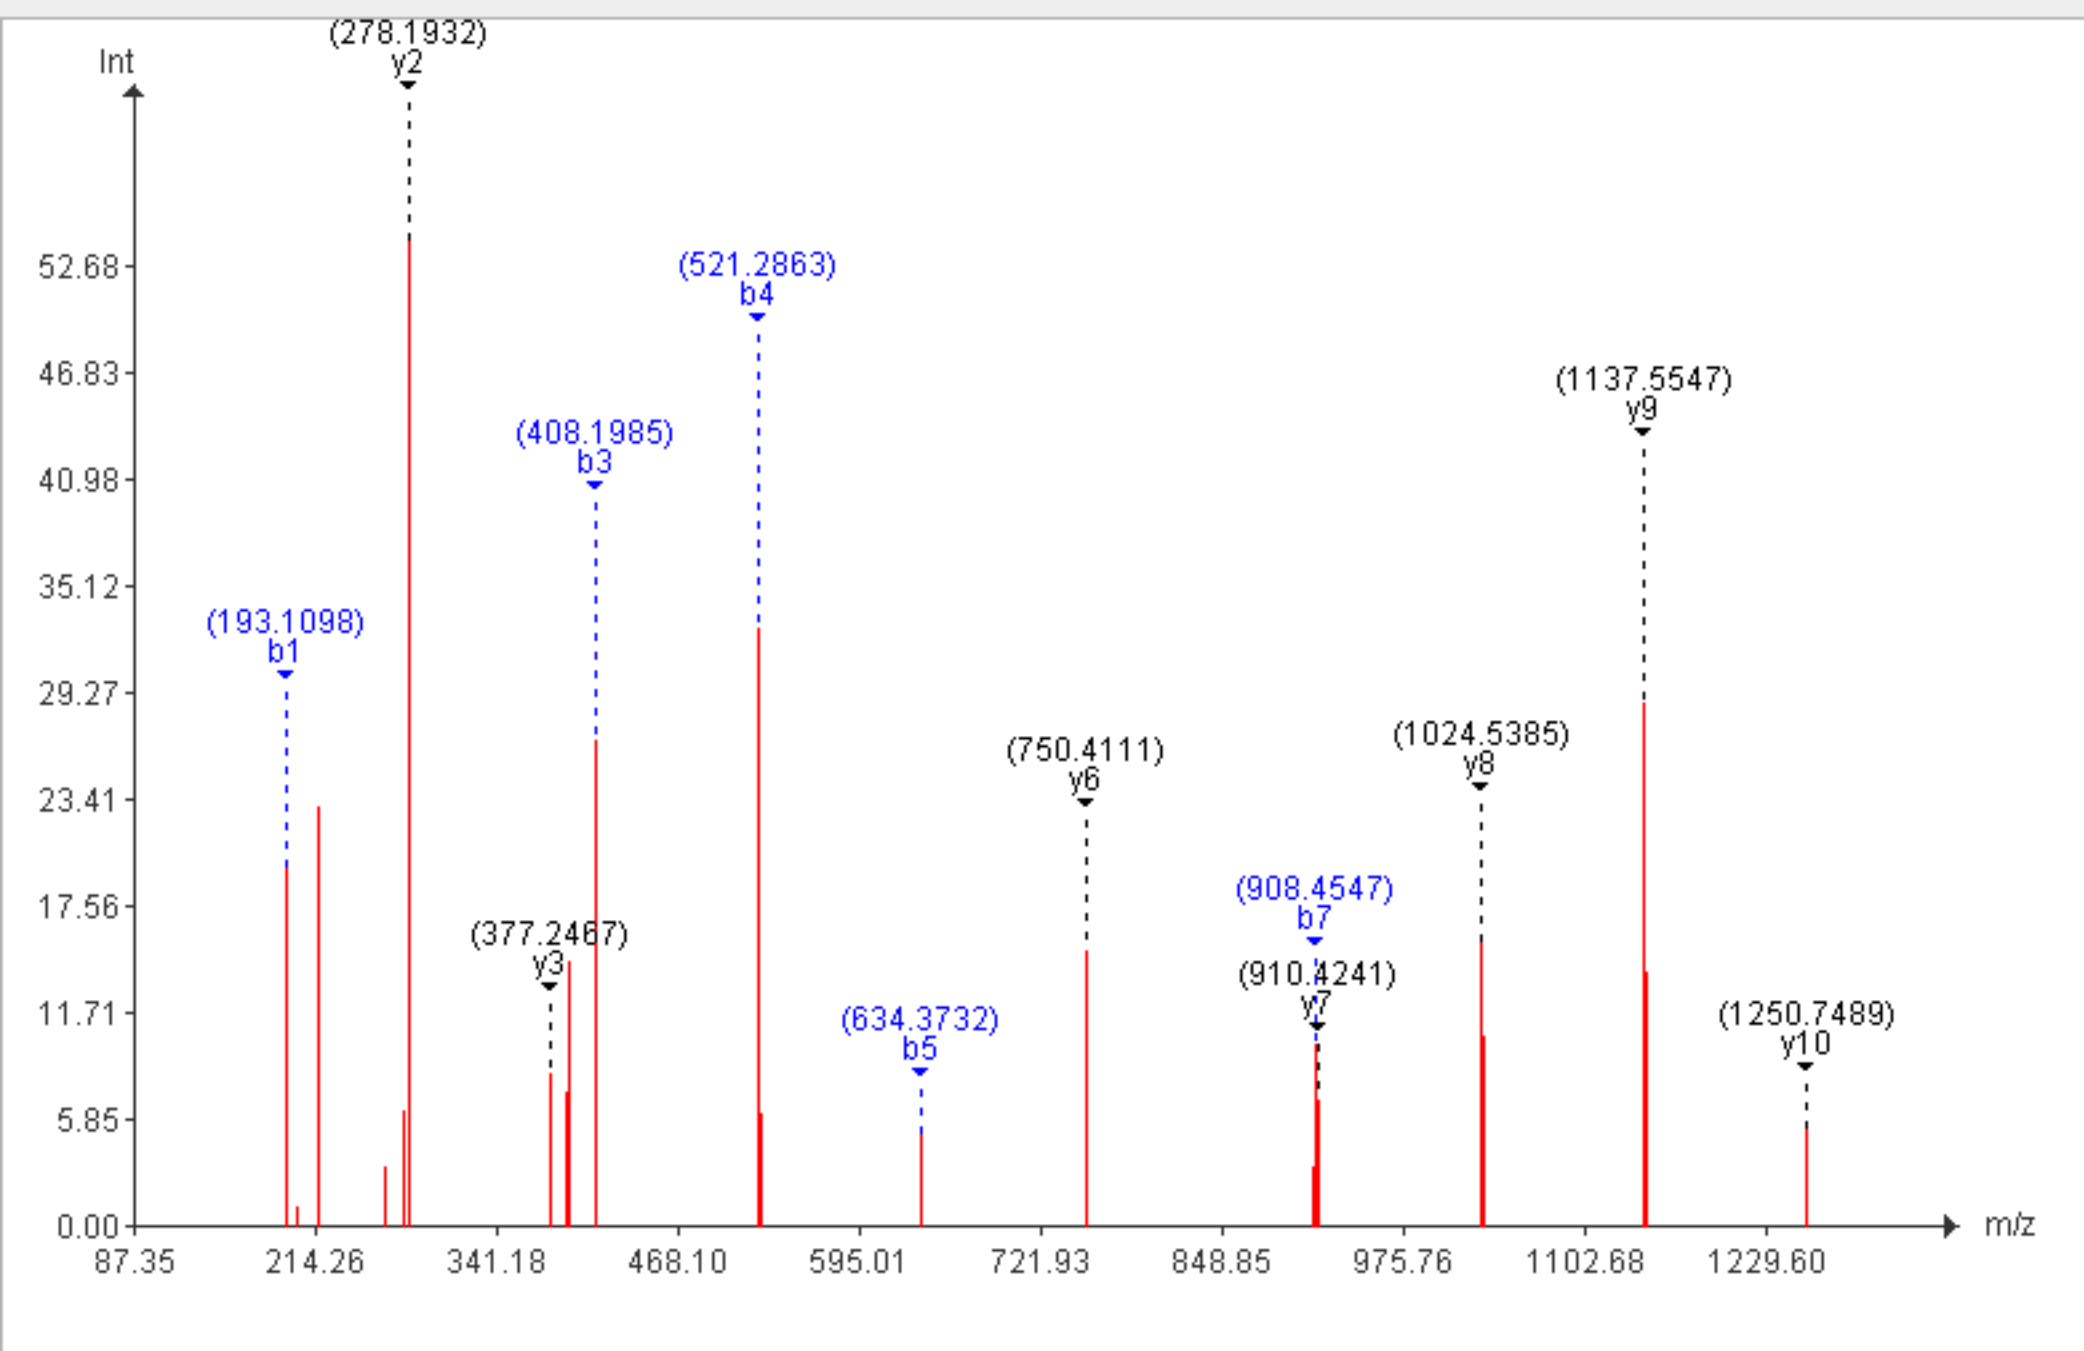

**AcD3-FPLSPPK(AcD3K\*)K(AcD3K\*)K(AcD3K\*)DL SLEEIQK(AcD3K\*)K(AcD3K\*)LEAAEER(C13\*)-COOH**

**precursor mass: 1100.6194 Da (charge: +3) protein: P54227 (35-60)**

**score (threshold): 37.0 (29.0)**

**instrument: Waters Q-TOF Premier**

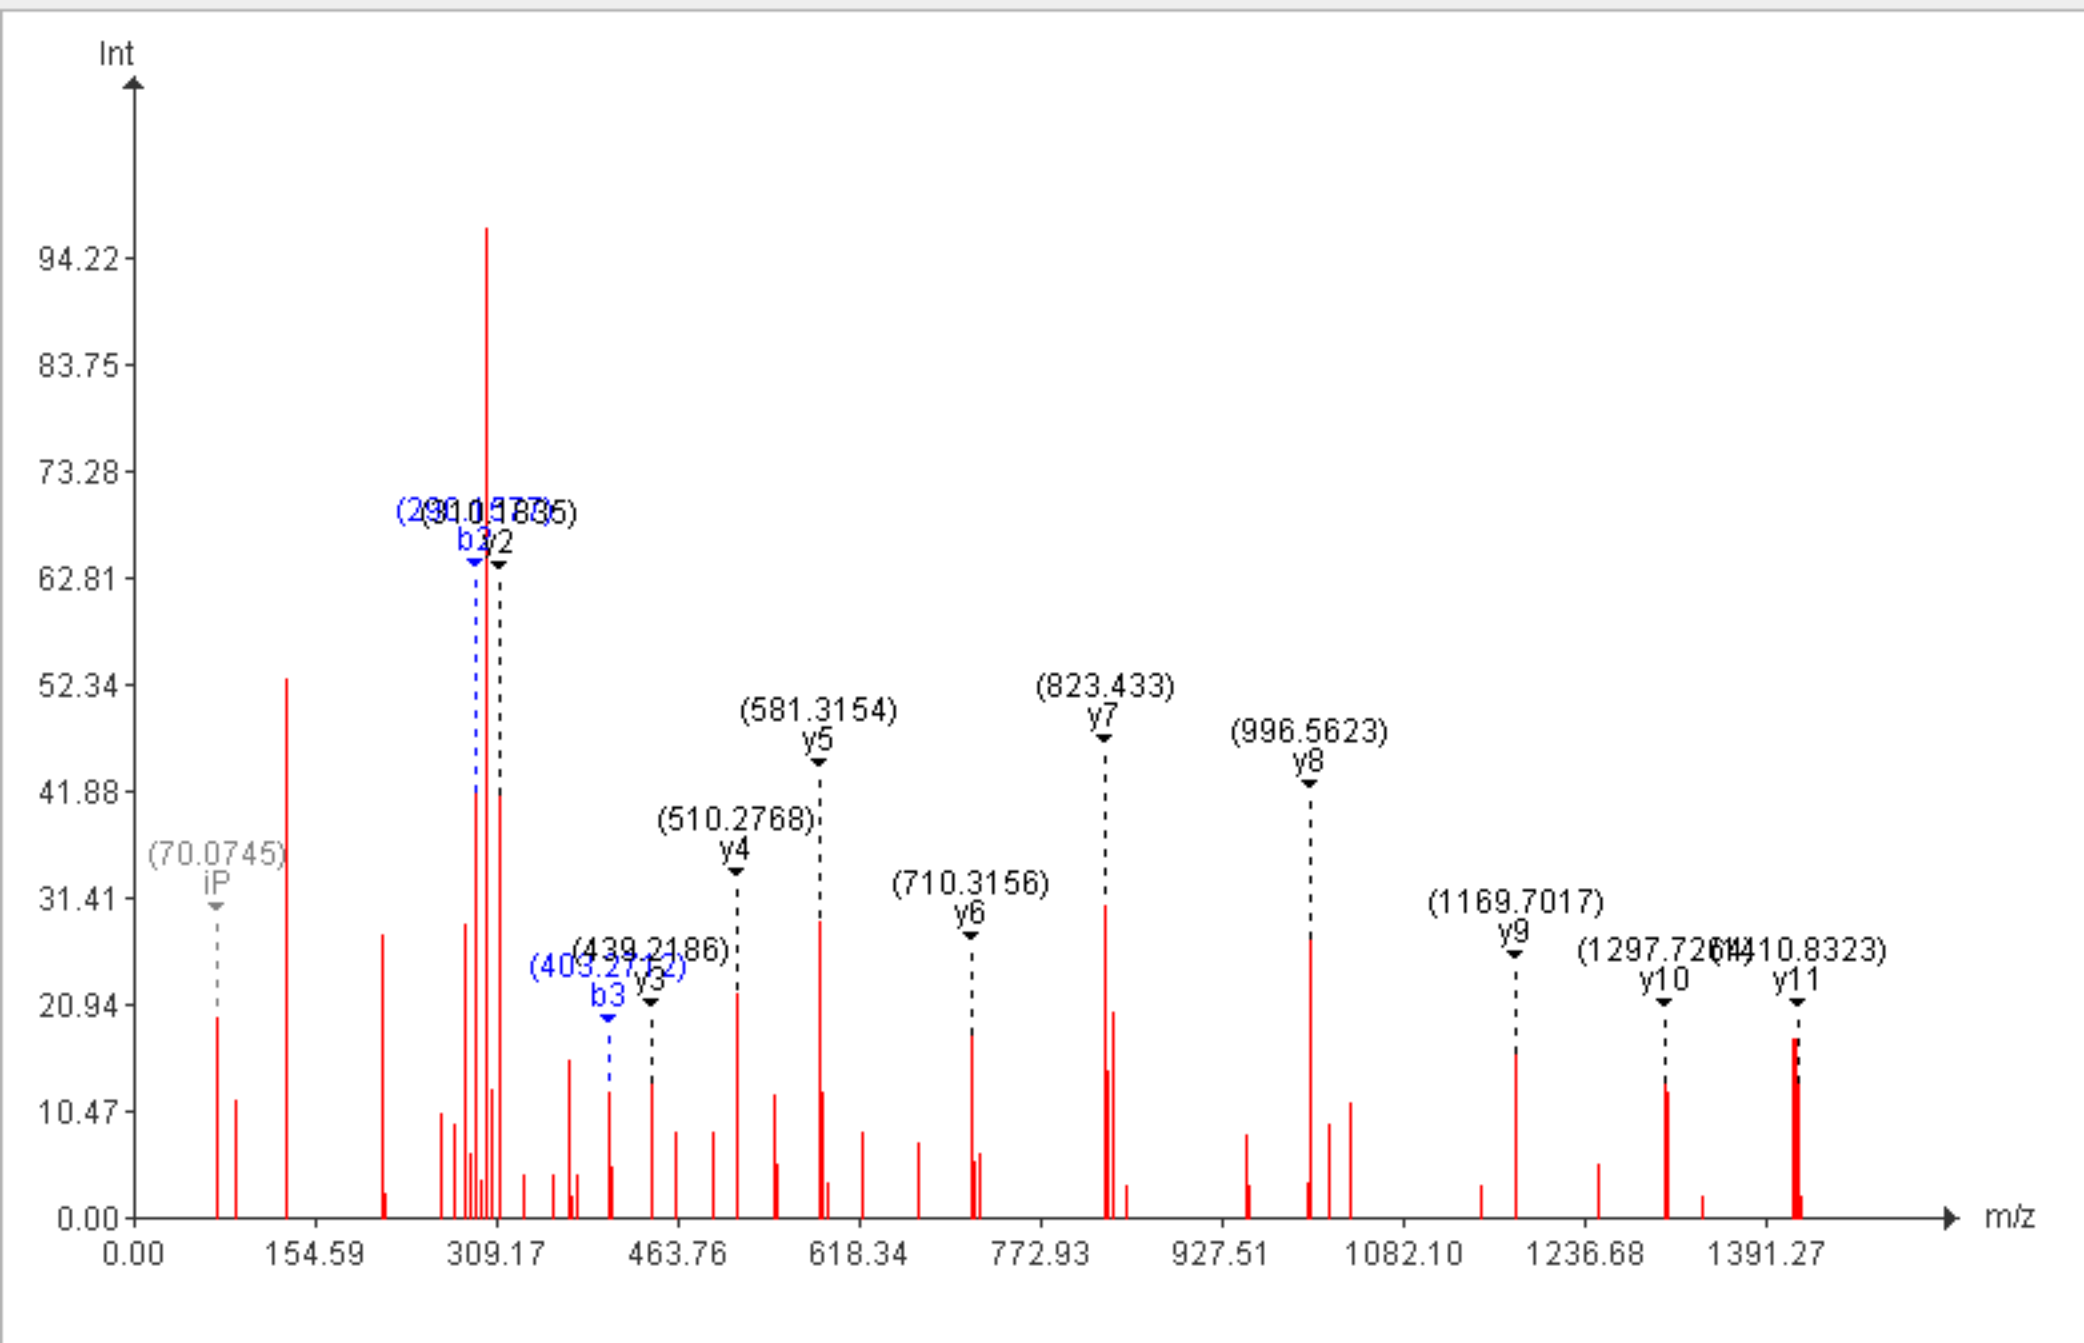

***AcD3-FSLADAINTEFK(AcD3K\*)NTR(C13\*)-COOH***  
**precursor mass: 911.9753 Da (charge: +2) protein: P20152 (86-100)**  
**score (threshold): 64.0 (30.0)**  
**instrument: Waters Q-TOF Premier**

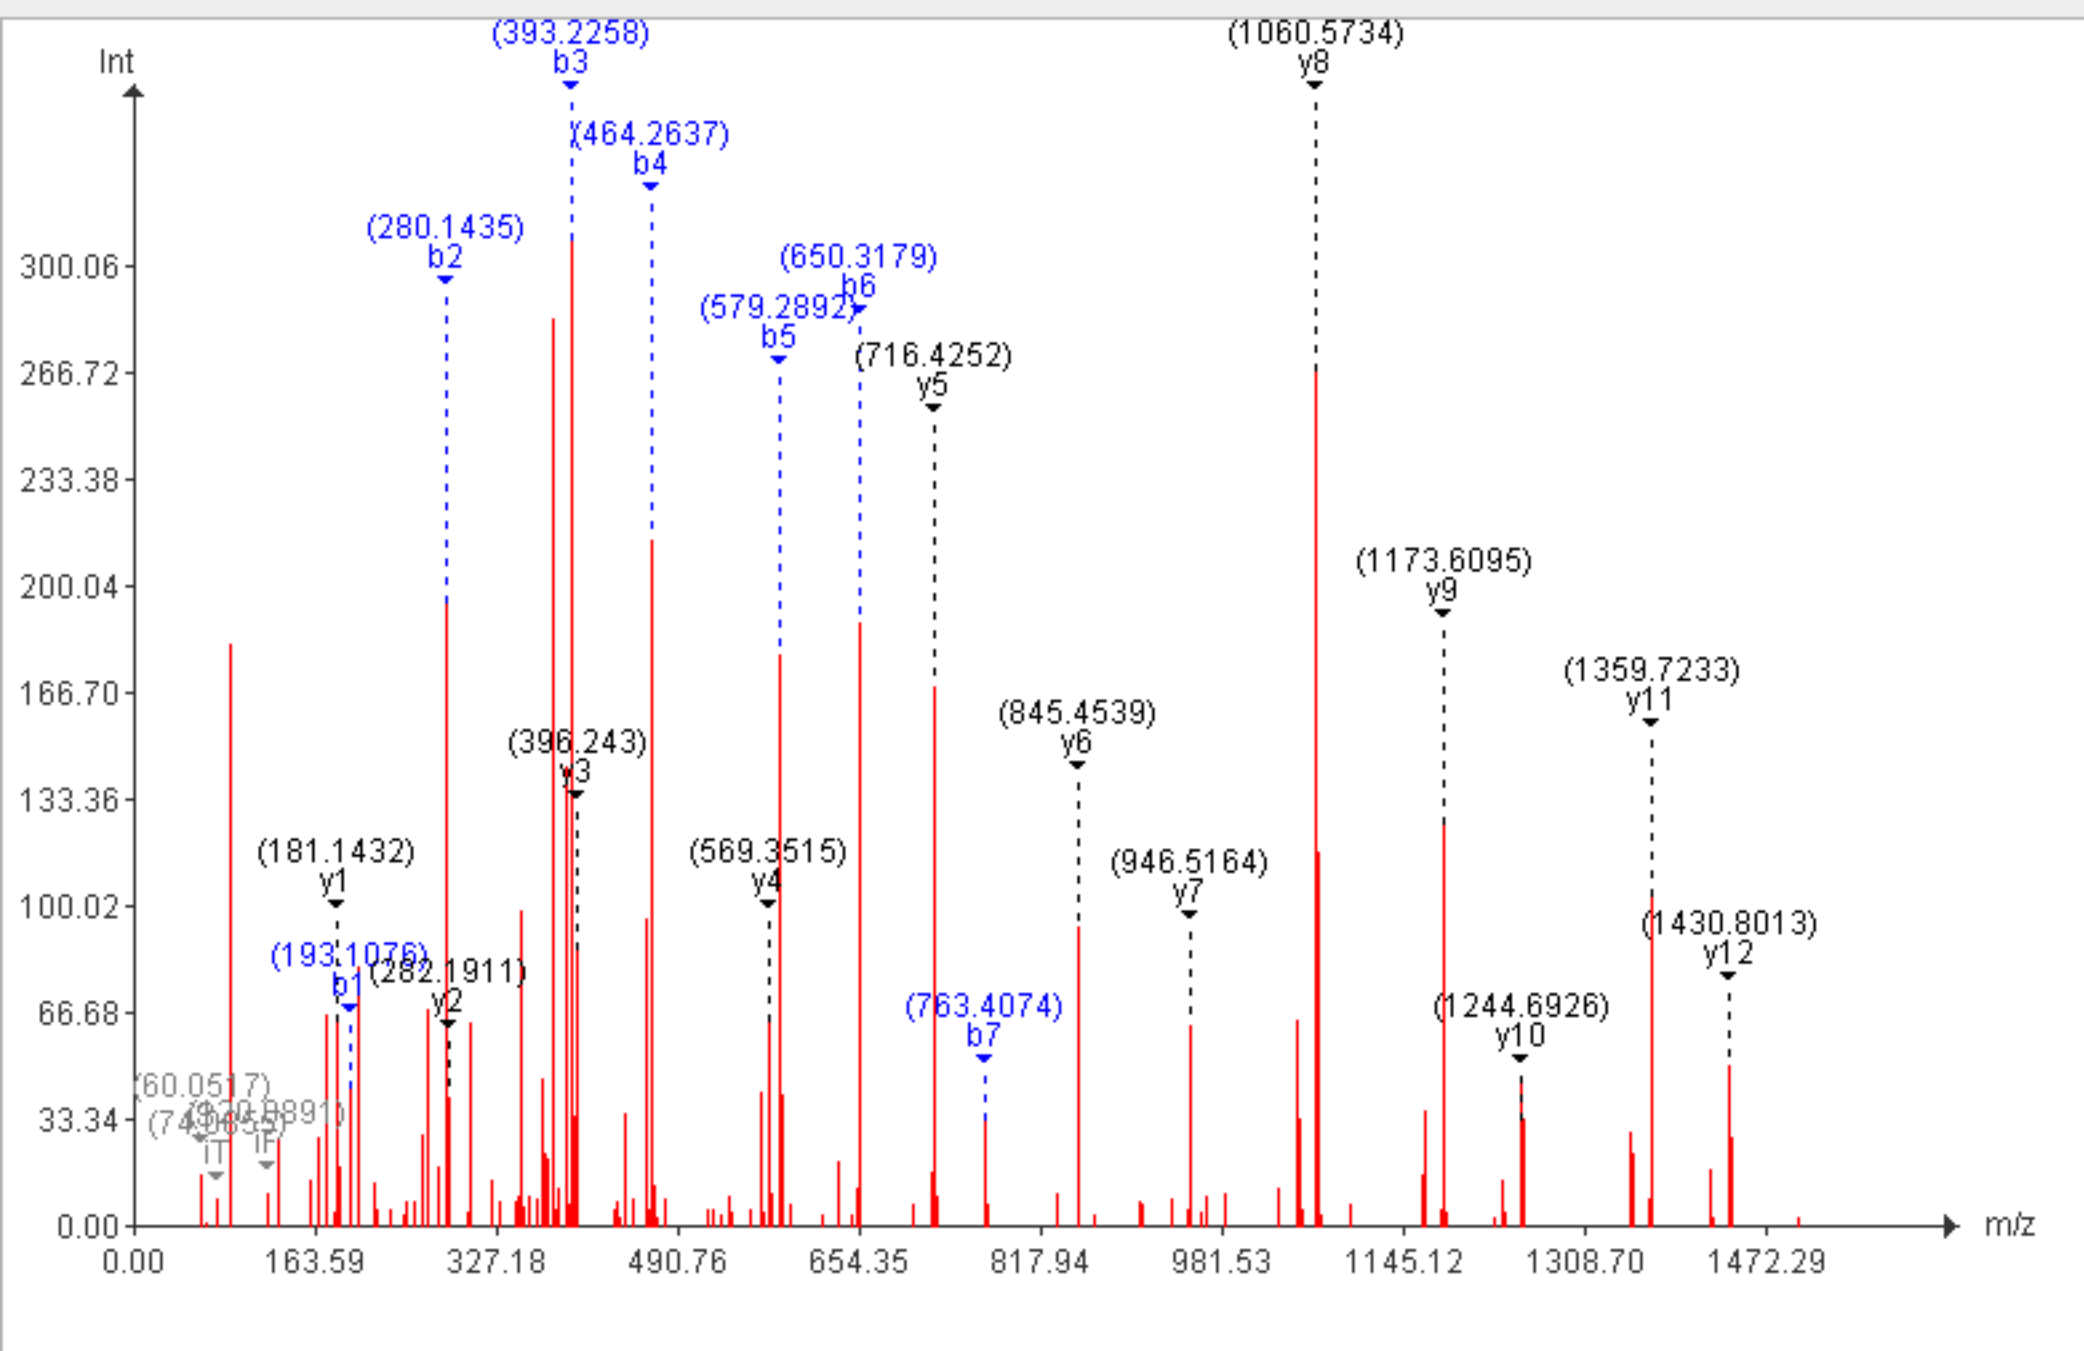

**AcD3-LFAIAK(AcD3K\*)DSQK(AcD3K\*)K(AcD3K\*)TQR(C13\*)-COOH**  
precursor mass: 910.5367 Da (charge: +2) protein: Q6PGL7 (669-682)  
score (threshold): 69.0 (31.0)  
instrument: Waters Q-TOF Premier

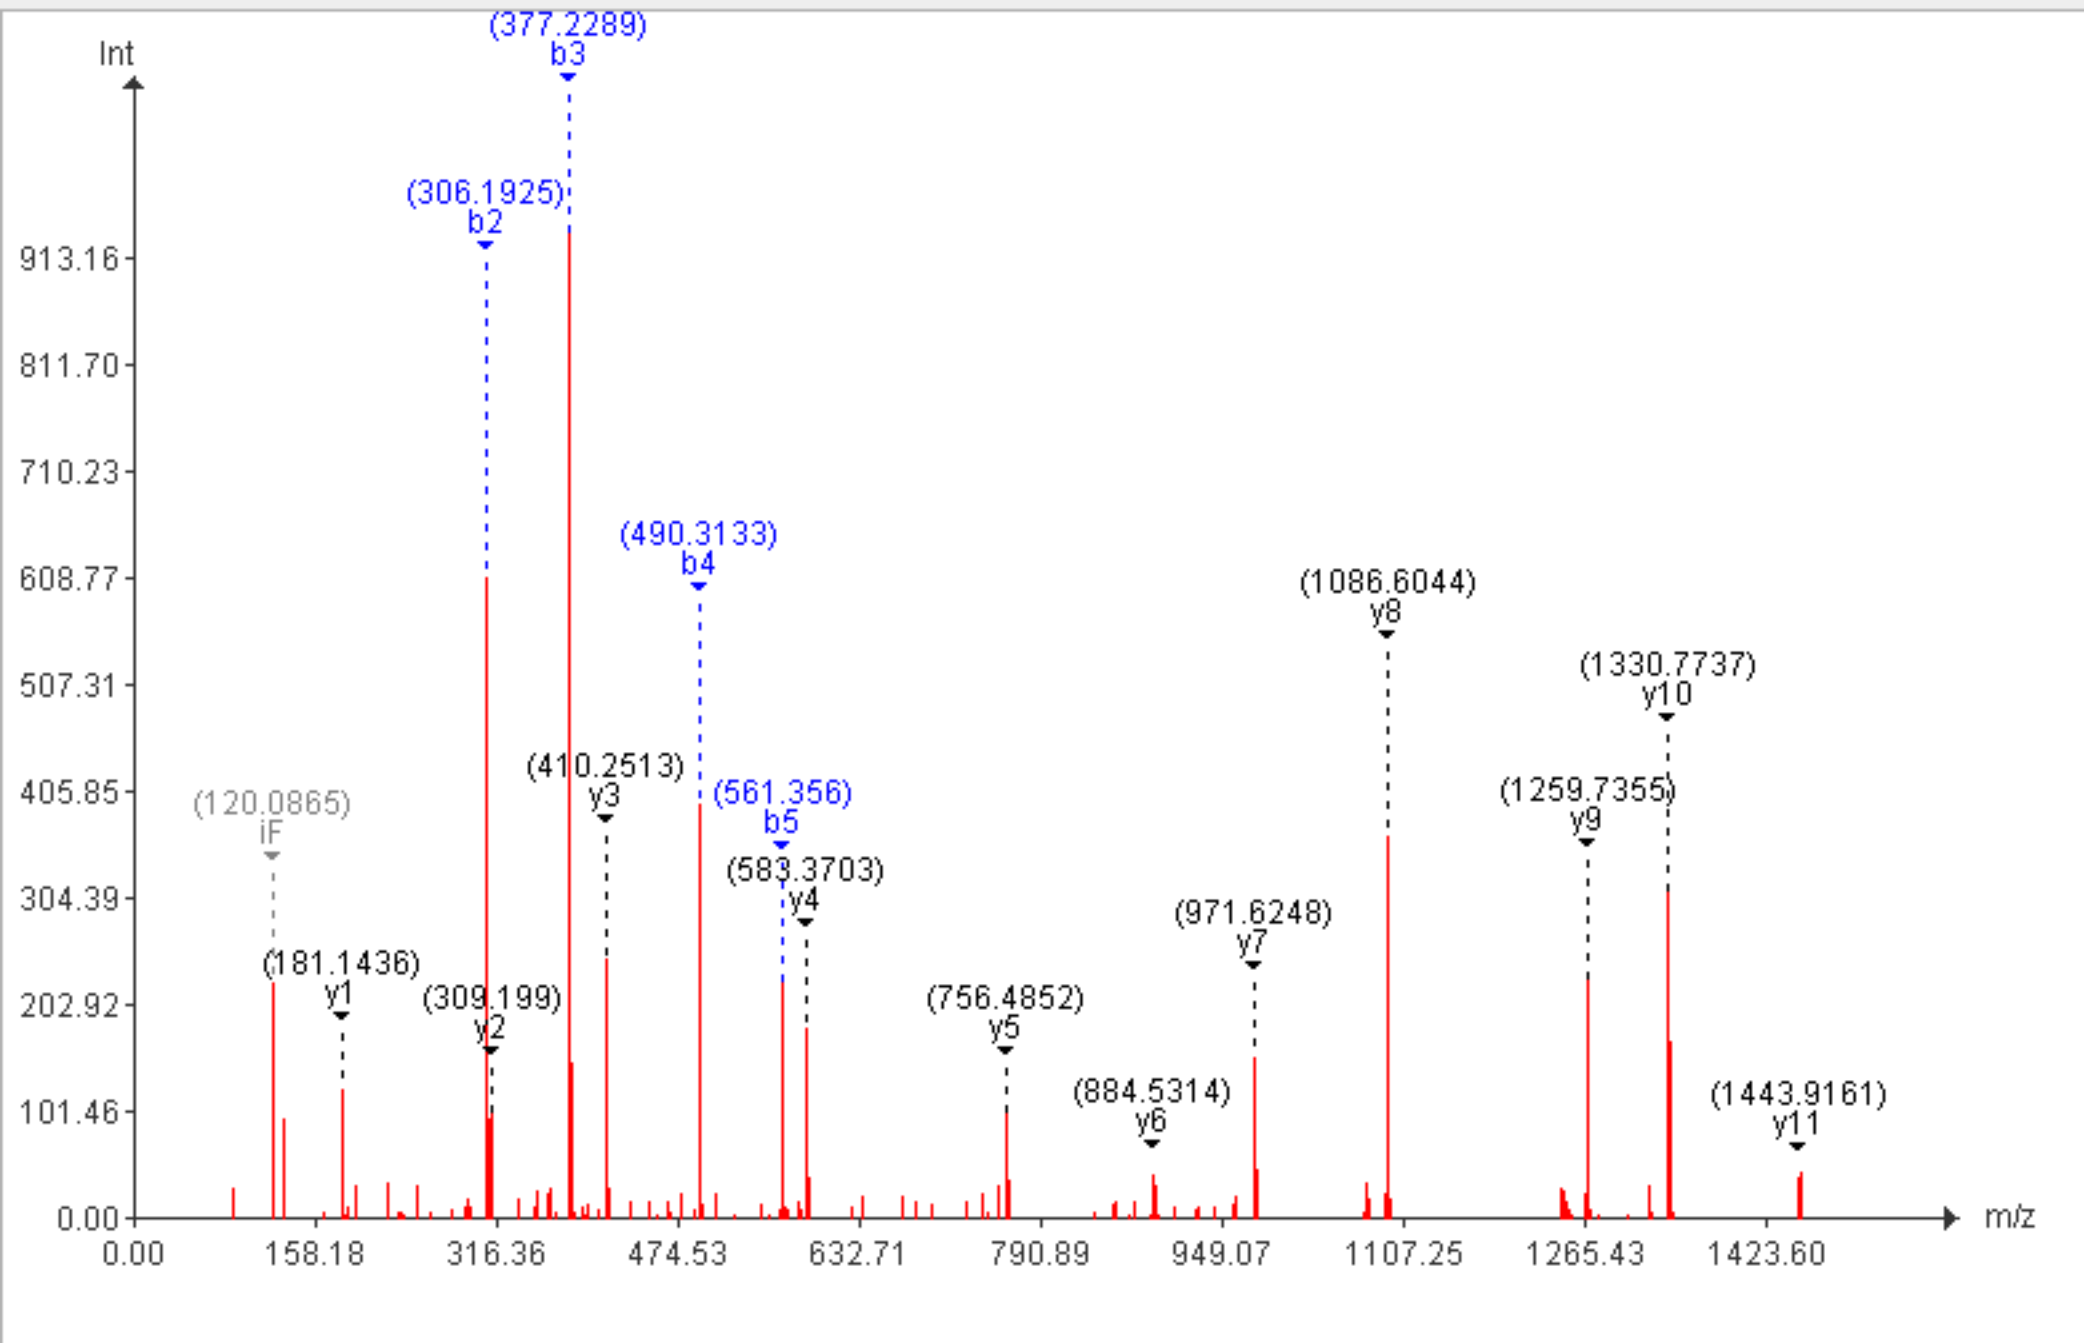

**AcD3-GLAVTPTVPVVGSM(Mox<sup>+</sup>)TR-COOH**  
precursor mass: 936.0070 Da (charge: +2) protein: P26369 (129-146)  
score (threshold): 44.0 (30.0)  
instrument: Waters Q-TOF Premier

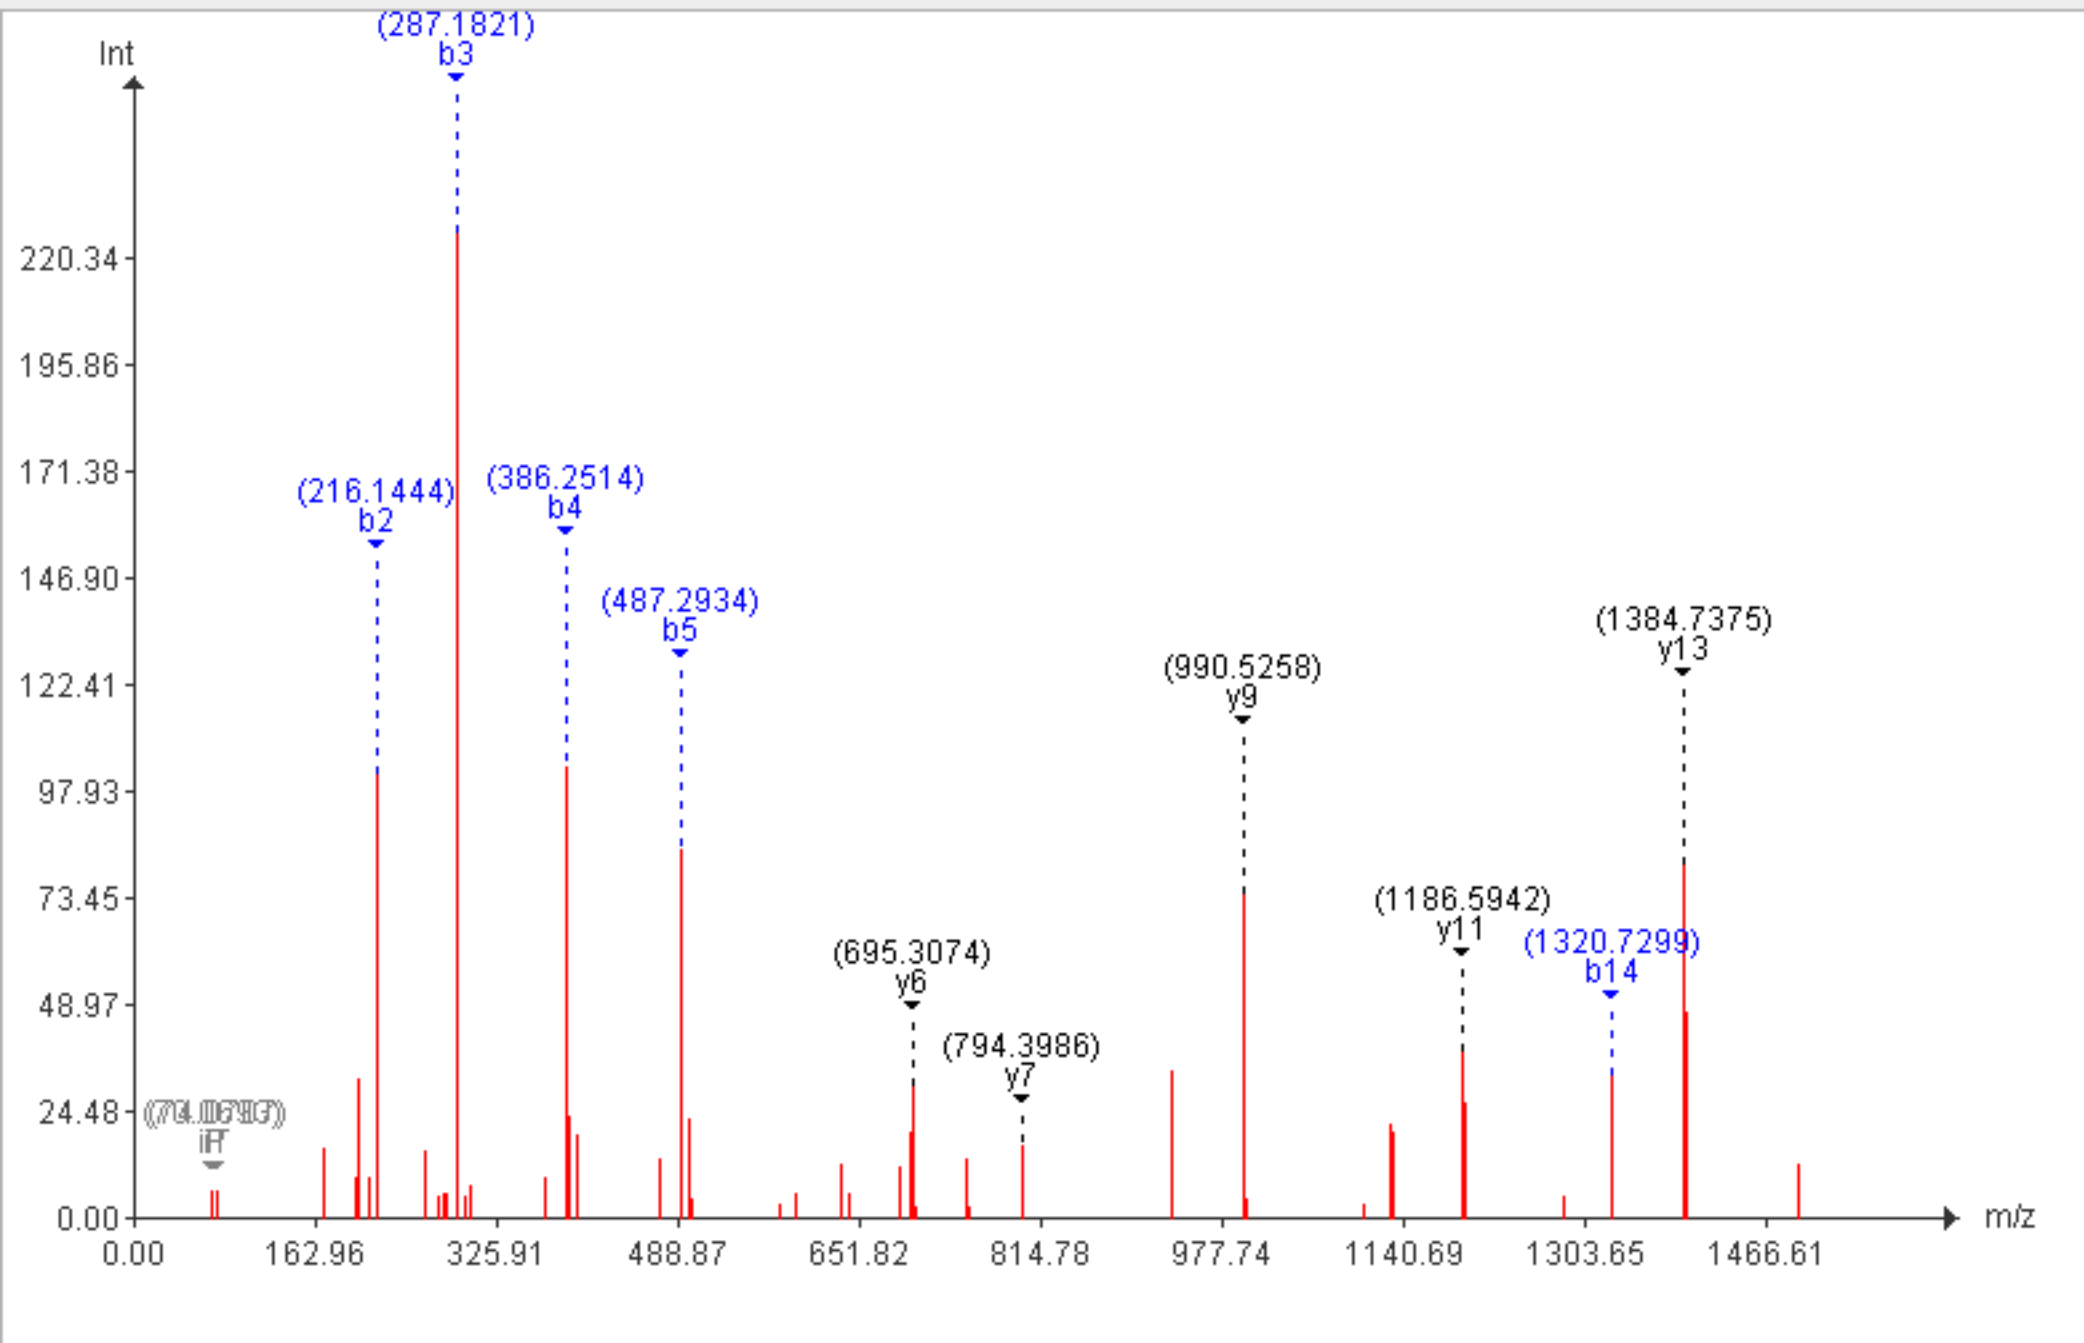

**AcD3-GLAVTPTVPVVG SQM(Mox<sup>+</sup>)TR-COOH**  
**precursor mass: 936.0104 Da (charge: +2) protein: P26369 (129-146)**  
**score (threshold): 41.0 (30.0)**  
**instrument: Waters Q-TOF Premier**

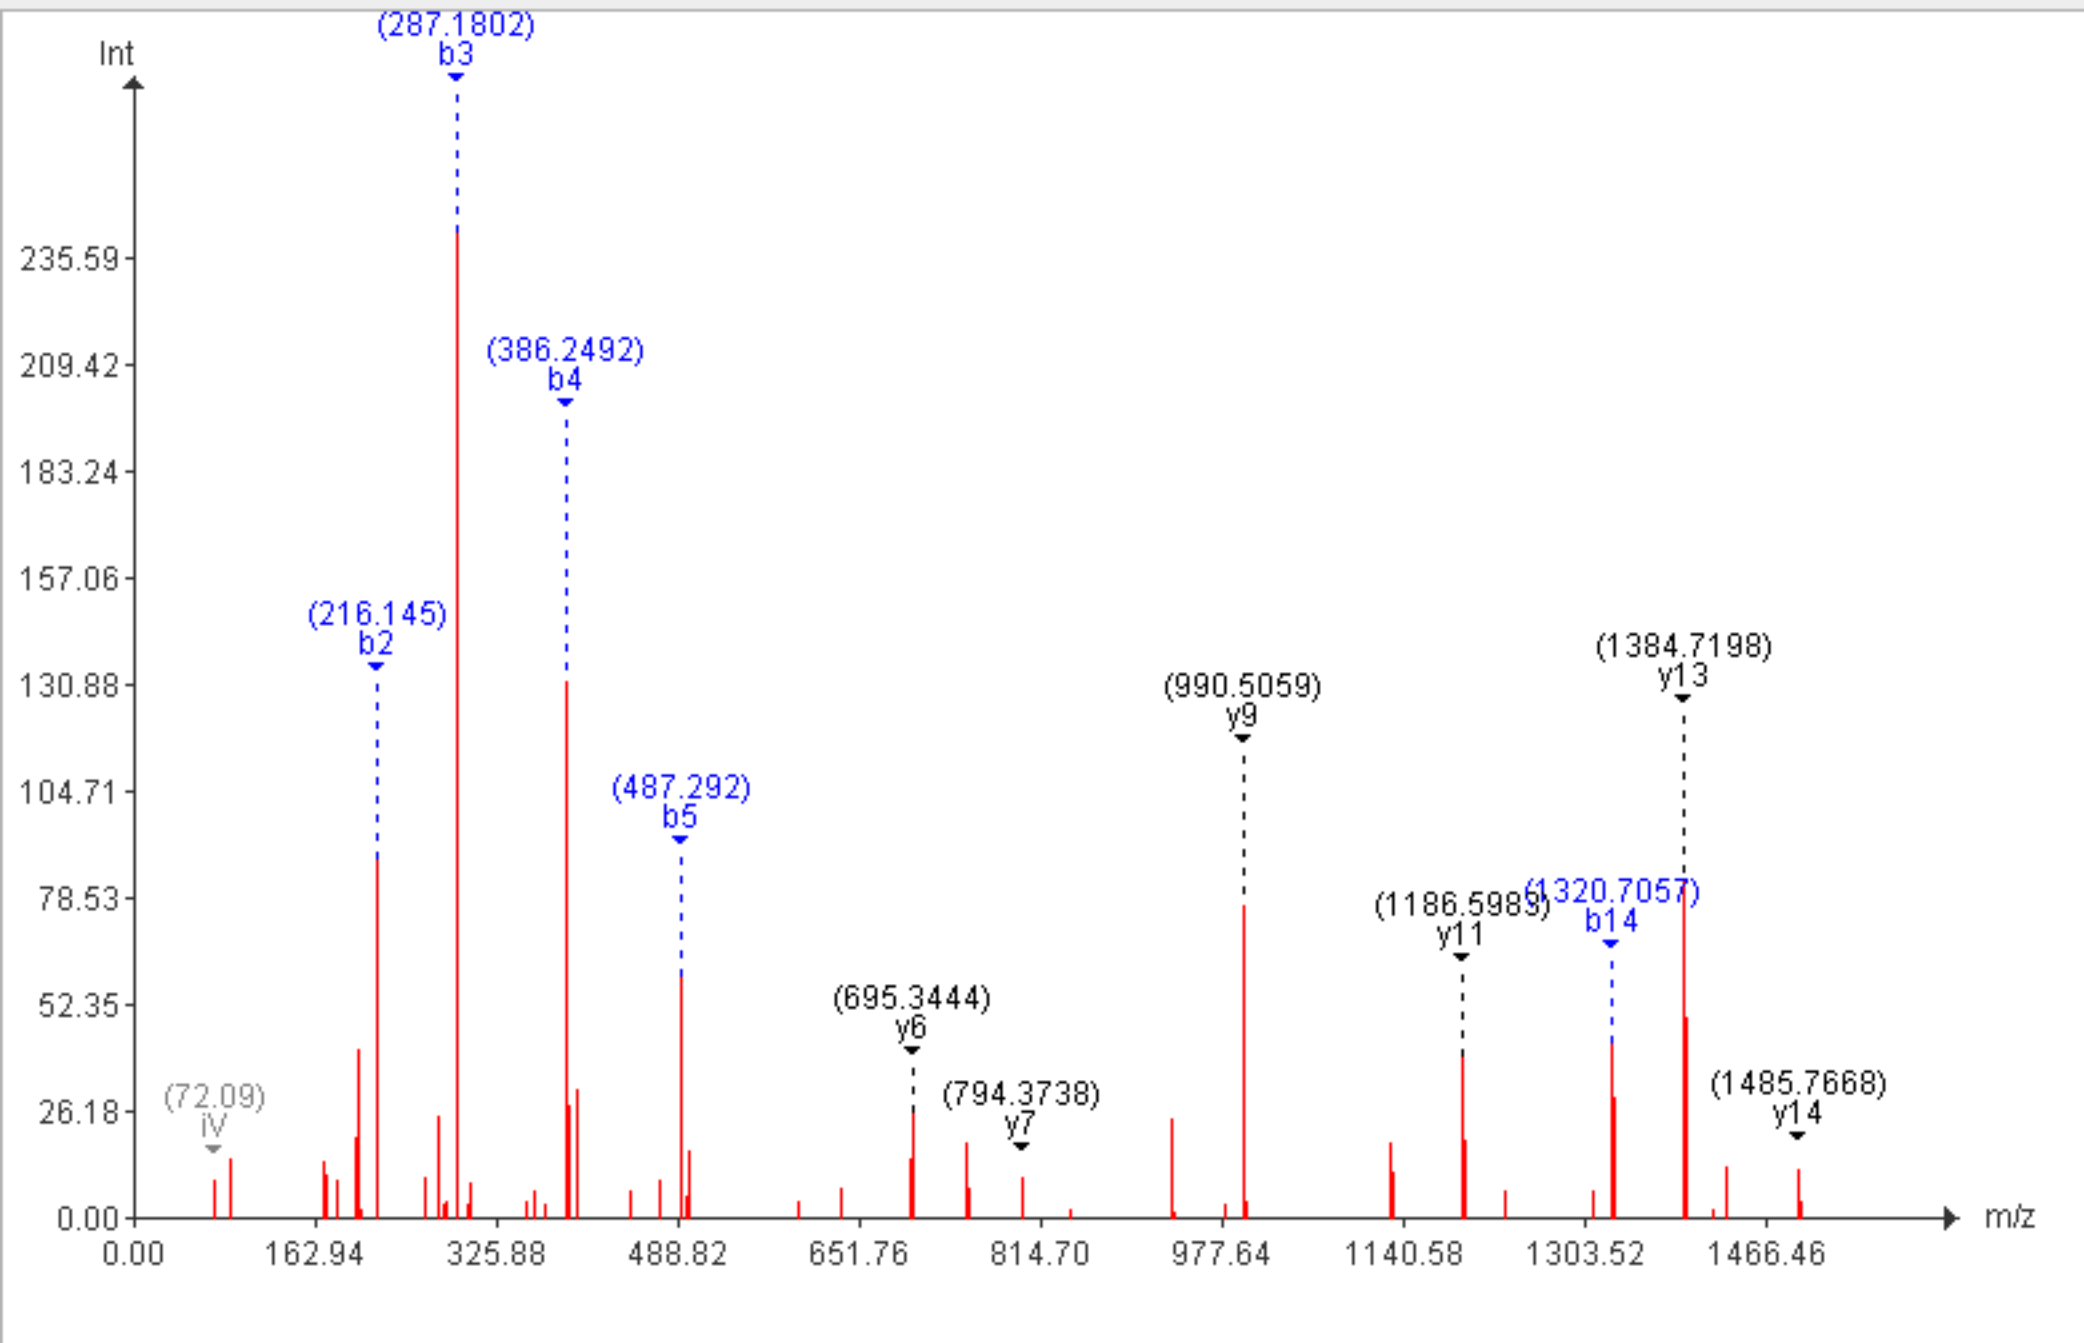

**AcD3-GK(AcD3K\*)GVVVVM(Mox\*)K(AcD3K\*)R-COOH**  
**precursor mass: 612.3773 Da (charge: +2) protein: P41105 (57-66)**  
**score (threshold): 34.0 (30.0)**  
**instrument: Waters Q-TOF Premier**

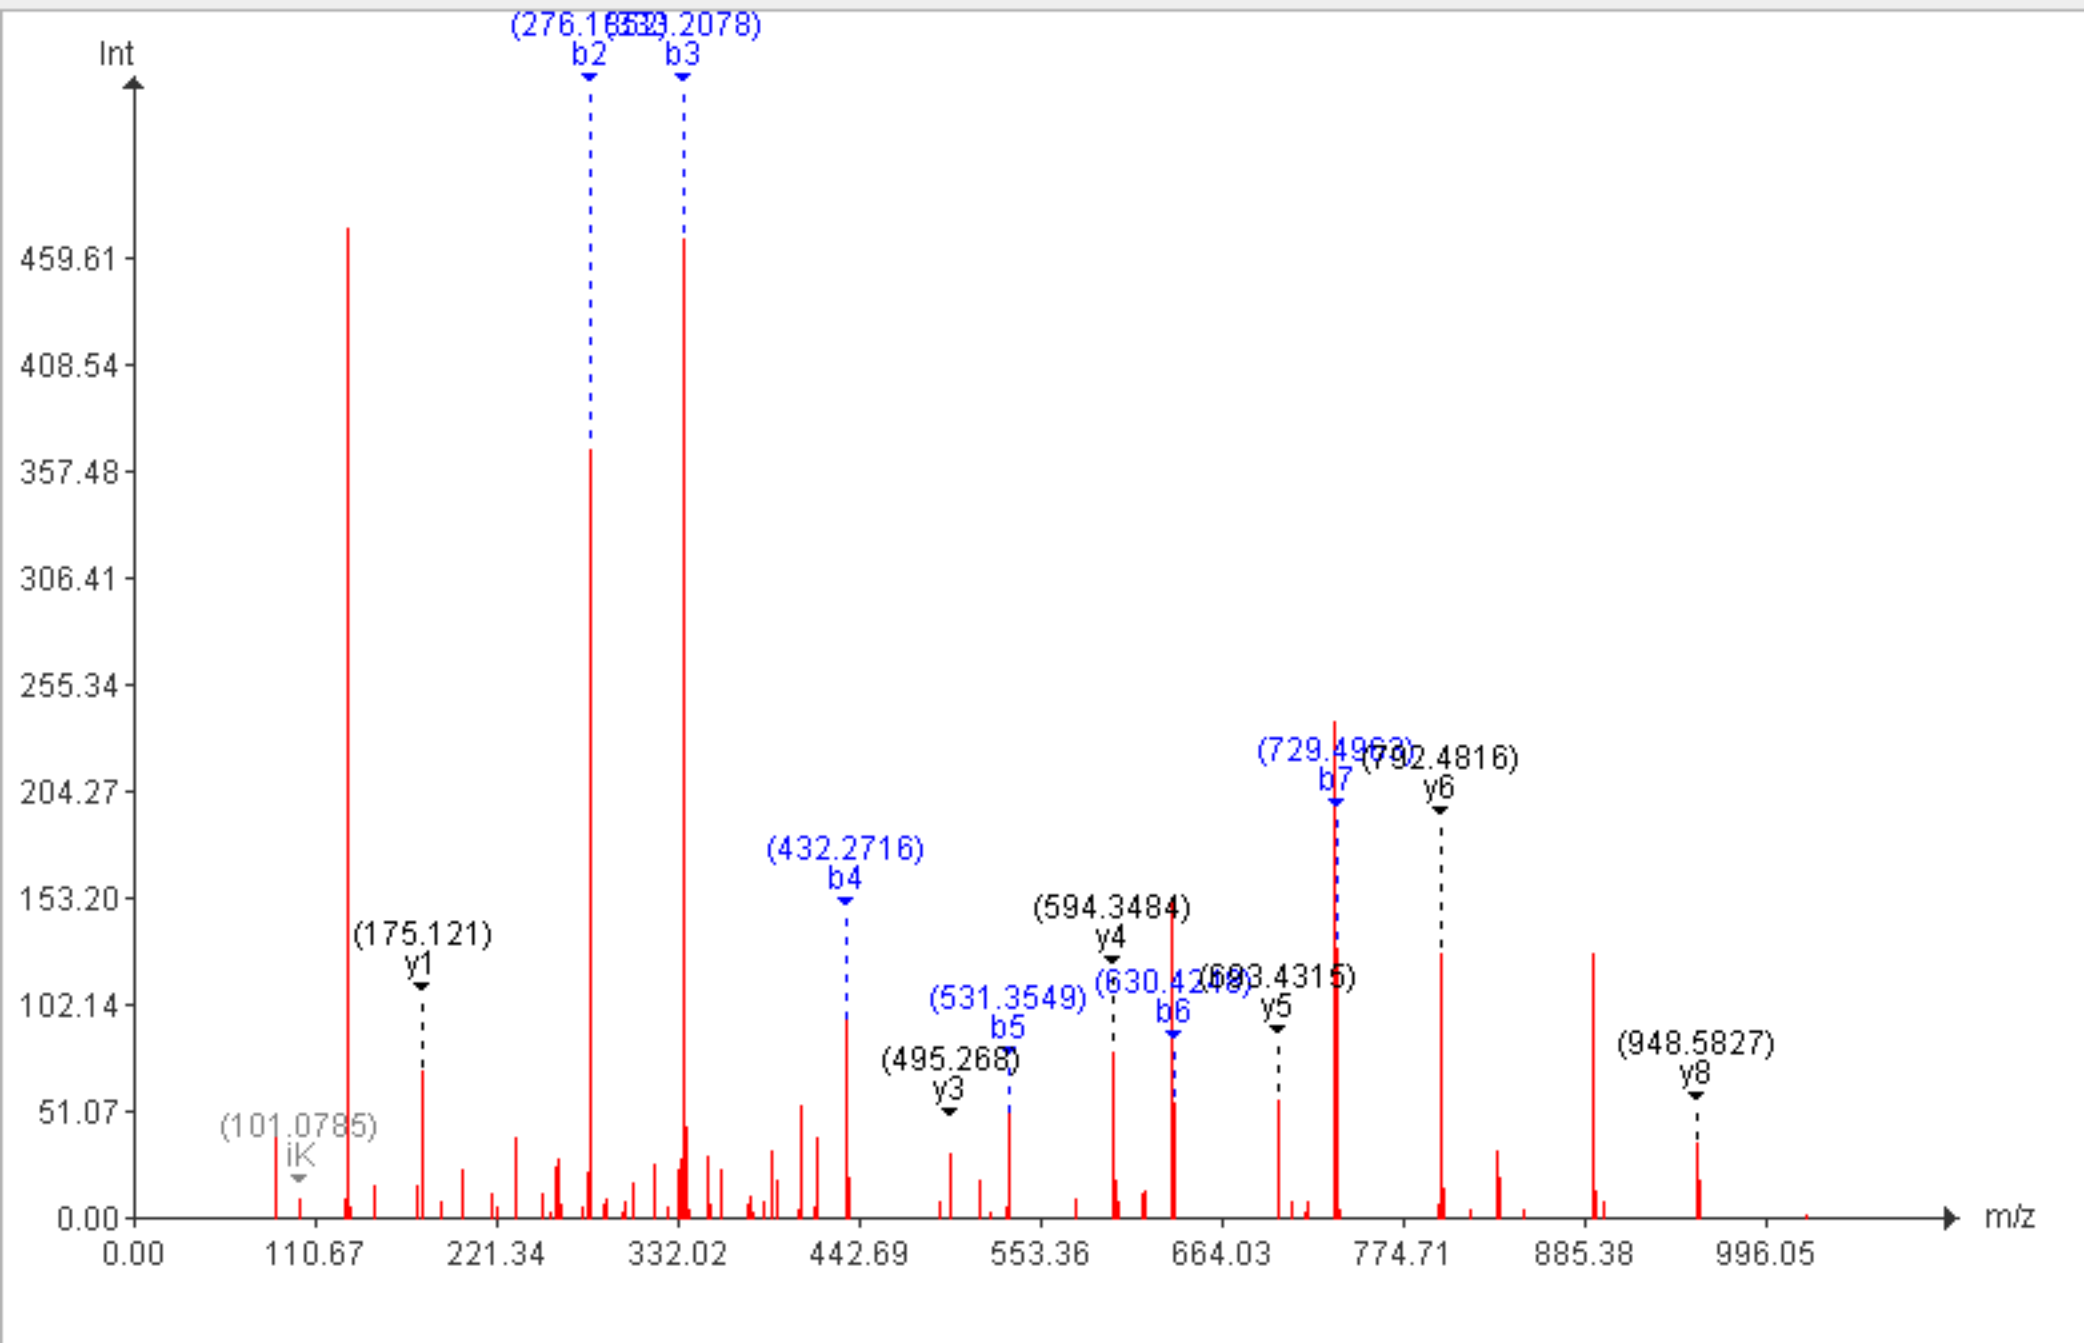



**AcD3-GK(AcD3K\*)VESIM(Mox\*)K(AcD3K\*)R(C13\*)-COOH**  
**precursor mass: 602.8497 Da (charge: +2) protein: P50516 (300-308)**  
**score (threshold): 35.0 (30.0)**  
**instrument: Waters Q-TOF Premier**

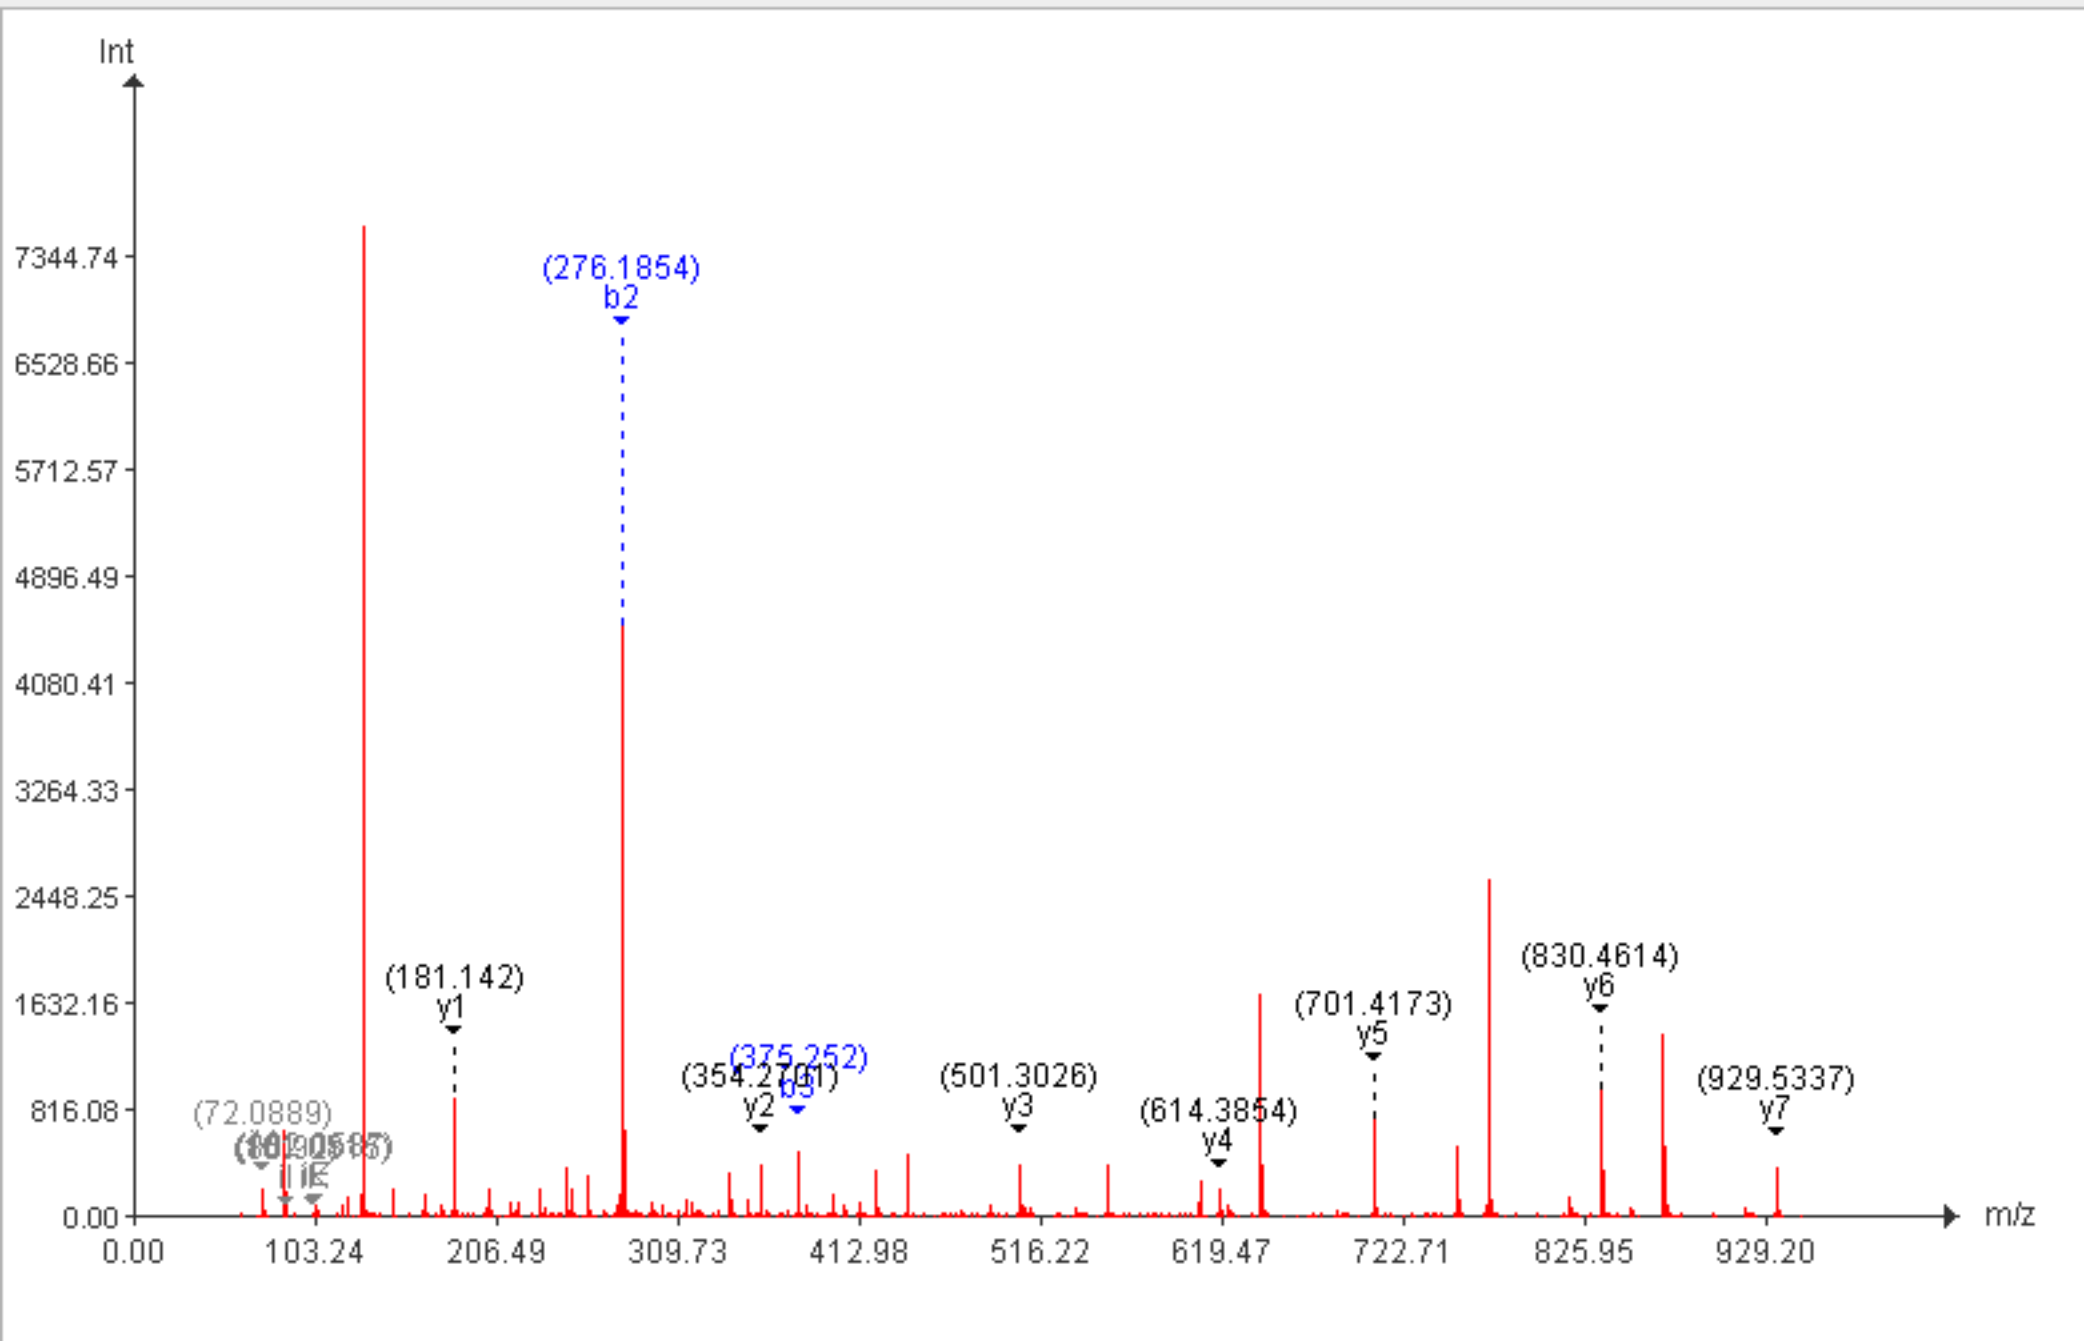

**AcD3-GVM(Mox<sup>+</sup>)N(Dam)GEYYQESNGPTDSYAAISEVDR-COOH**  
**precursor mass: 972.0778 Da (charge: +3) protein: O08585 (76-101)**  
**score (threshold): 77.0 (27.0)**  
**instrument: Waters Q-TOF Premier**

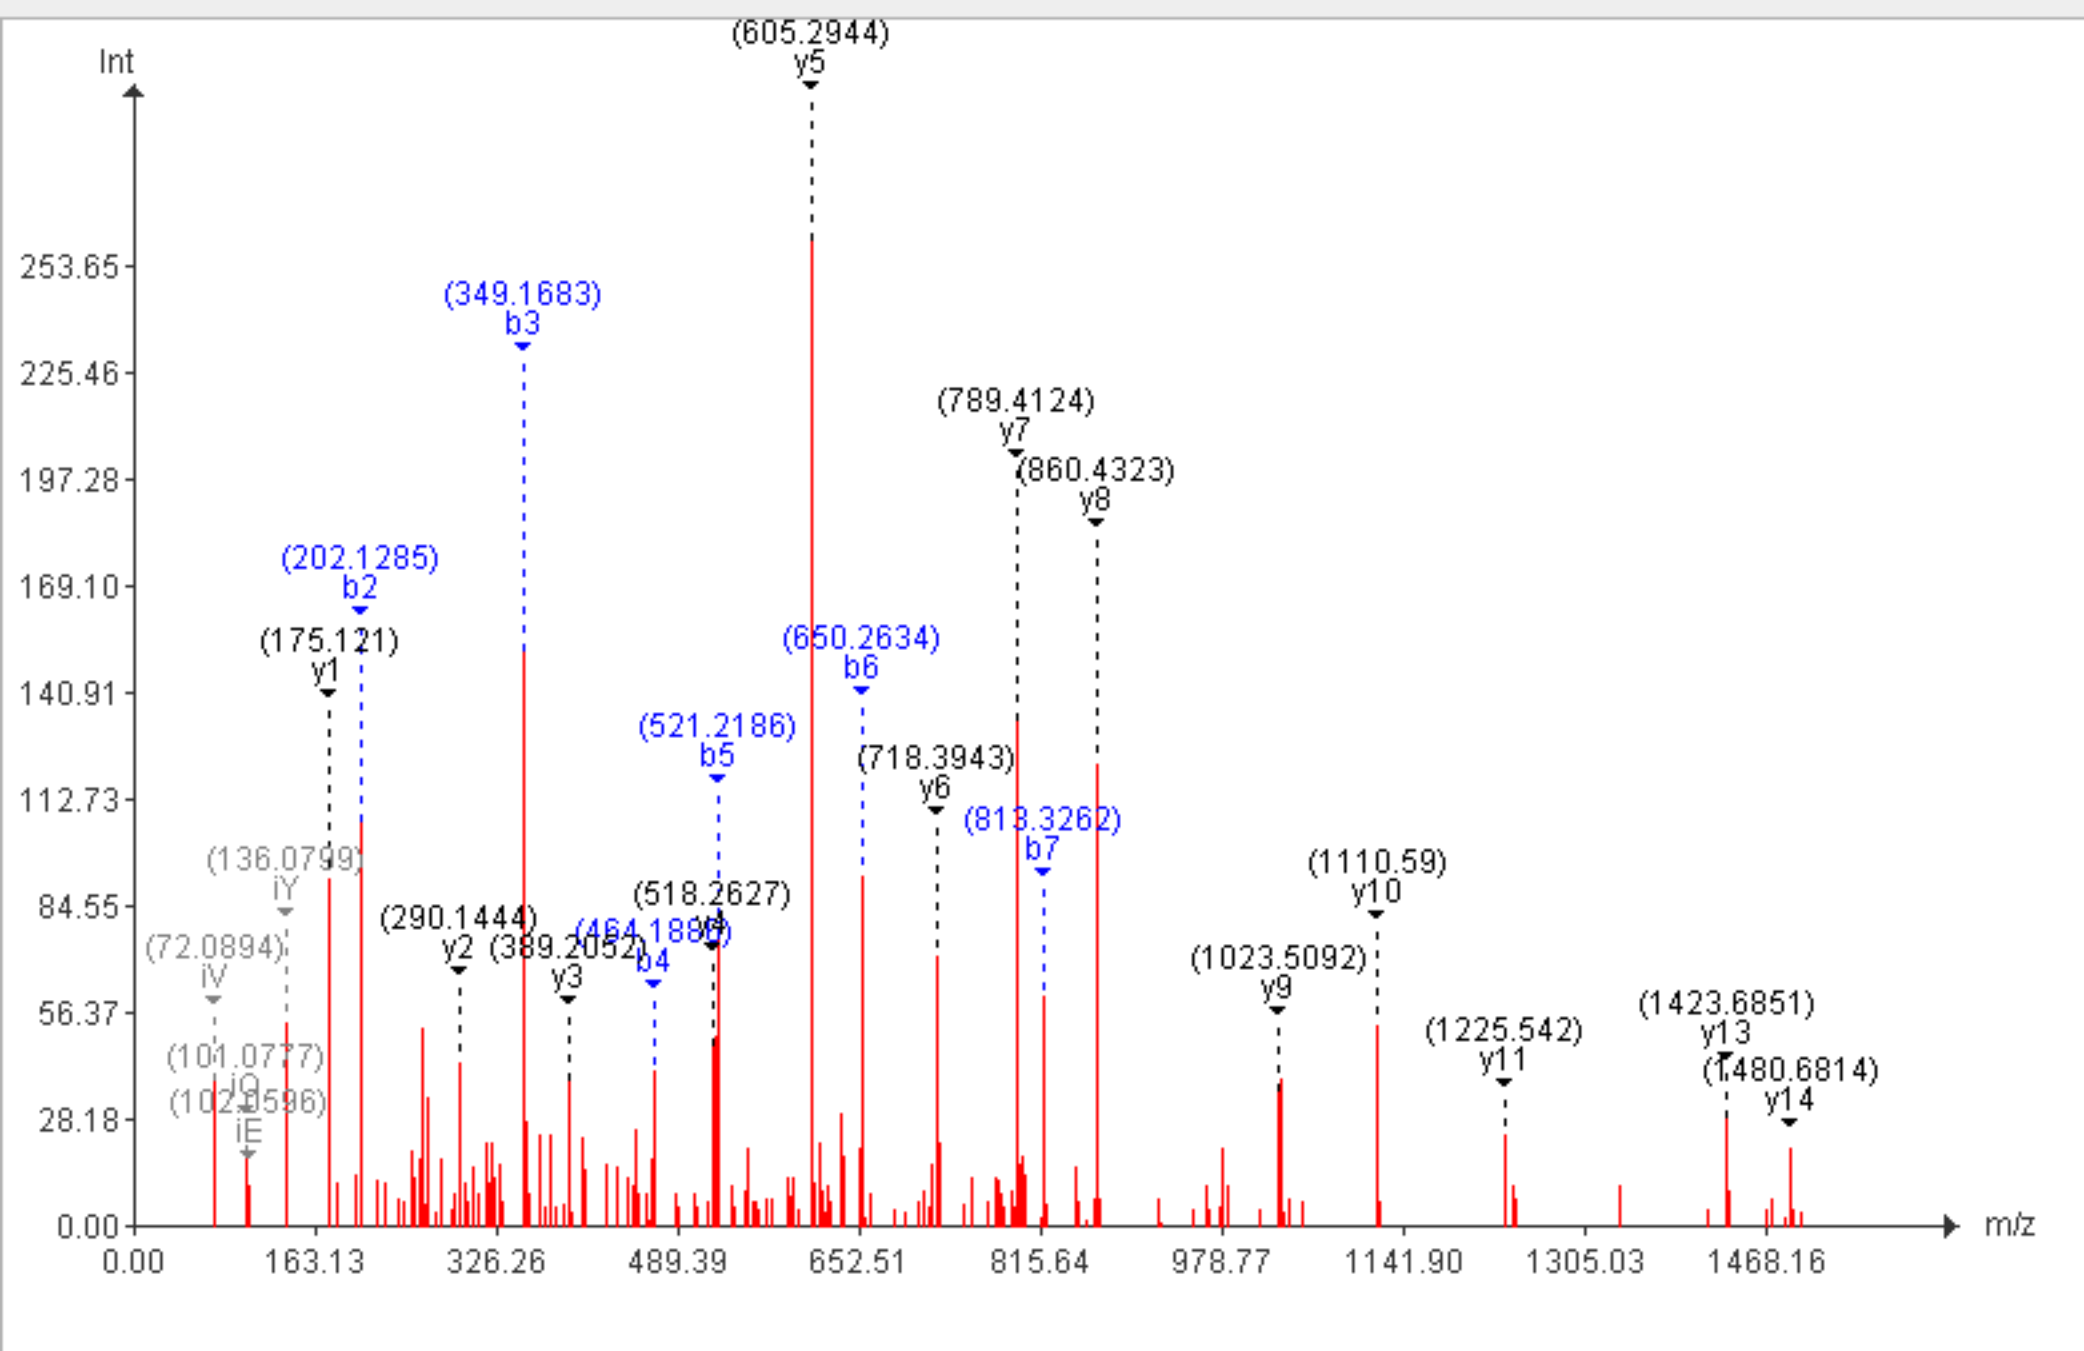

**AcD3-ASSAVK(AcD3K\*)VK(AcD3K\*)R-COOH**  
**precursor mass: 540.8302 Da (charge: +2) protein: Q921F2 (90-98)**  
**score (threshold): 71.0 (30.0)**  
**instrument: Waters Q-TOF Premier**

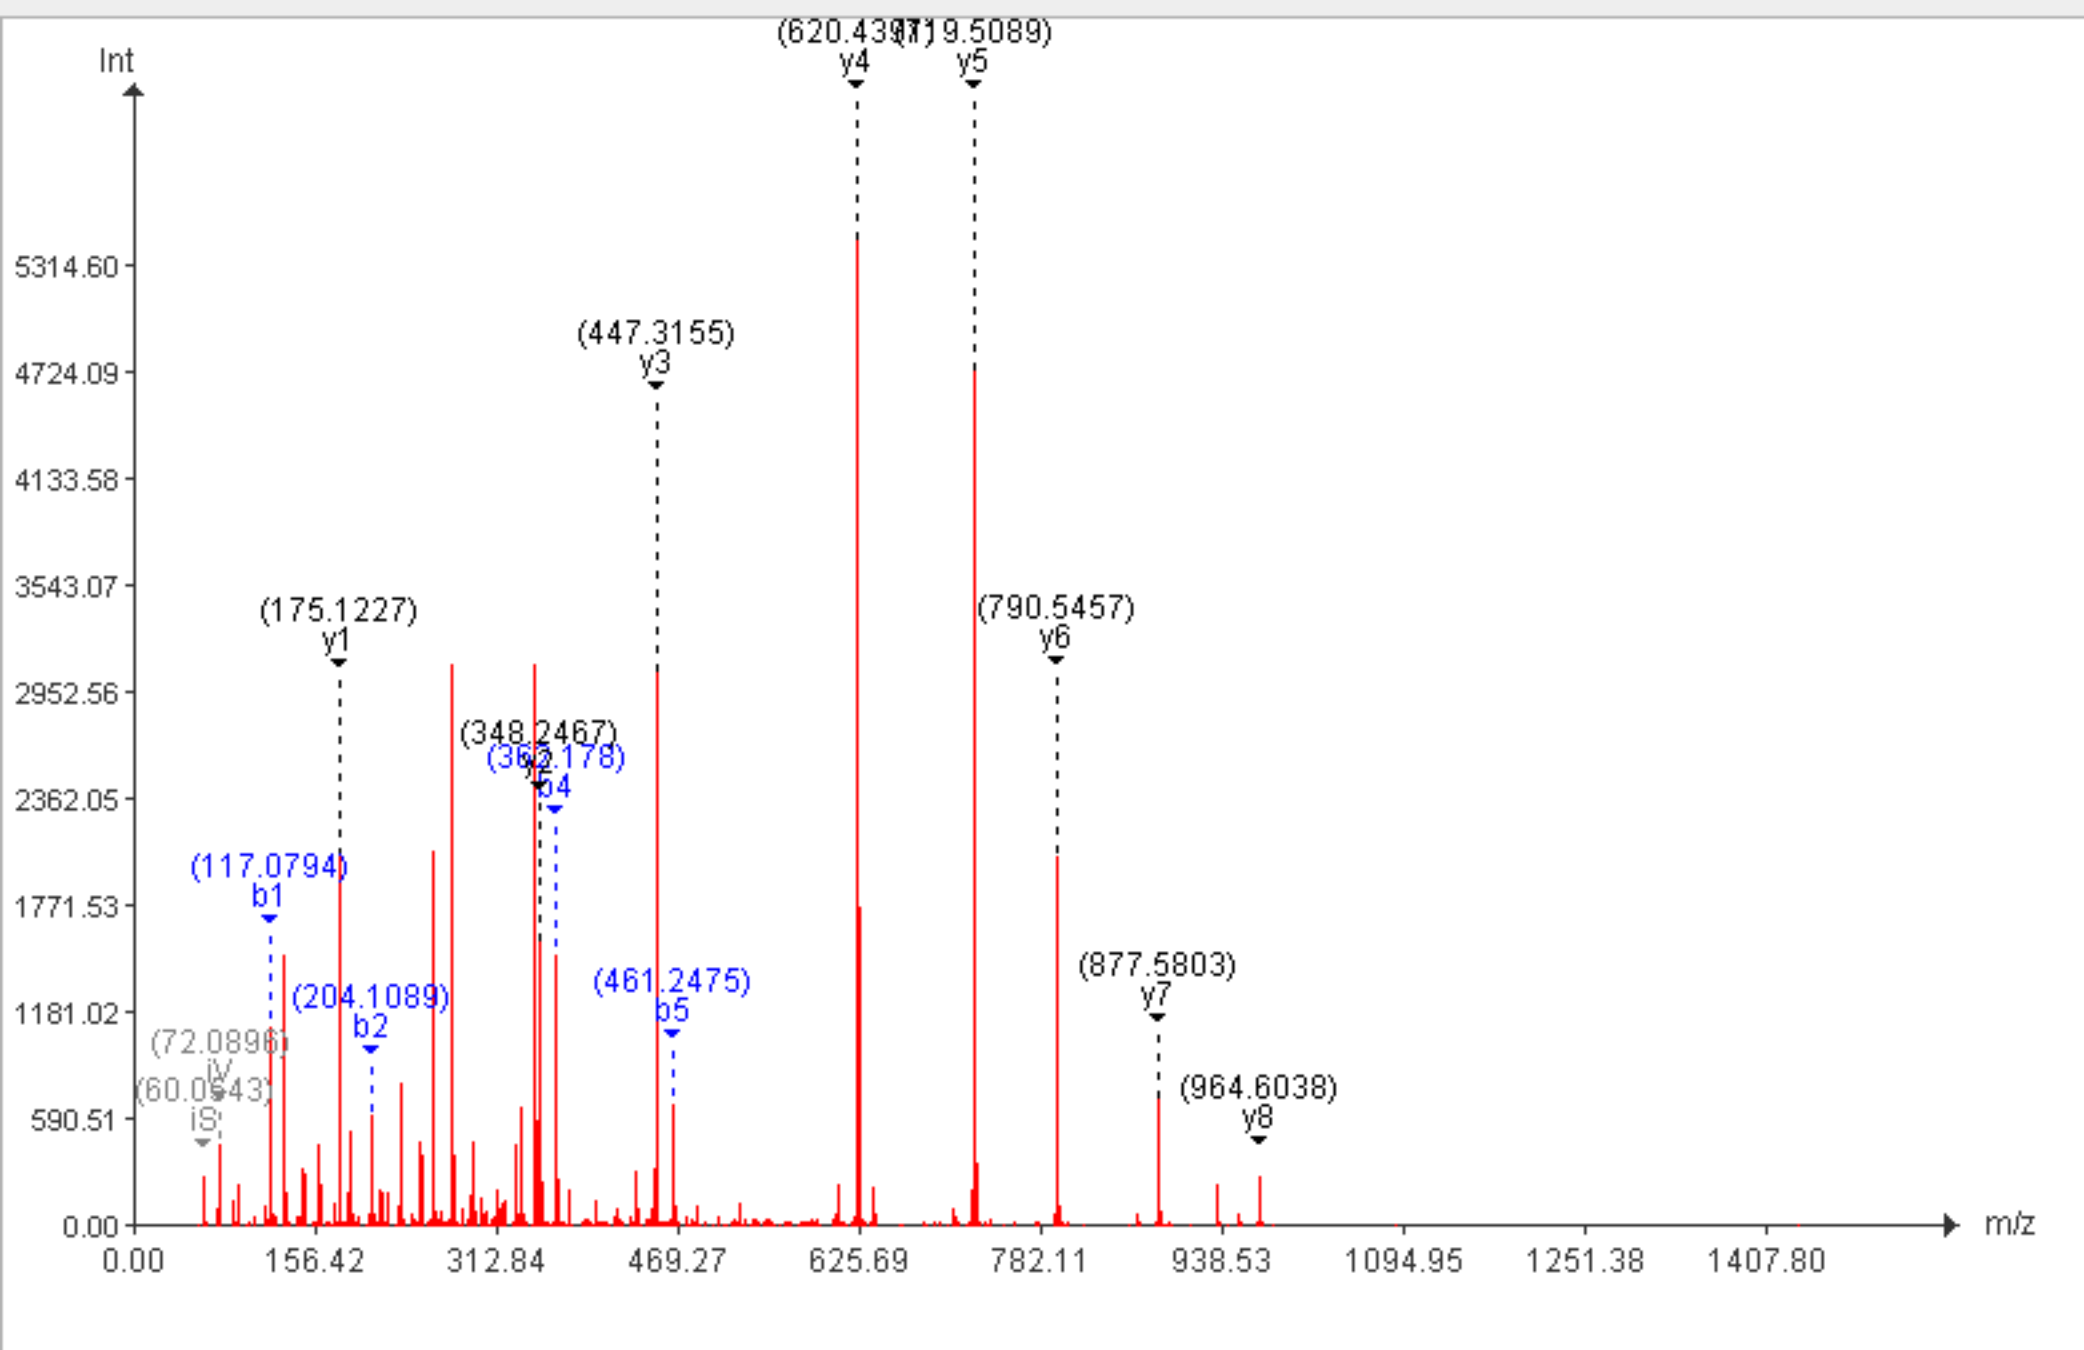

**AcD3-AGM(Mox<sup>+</sup>)AM(Mox<sup>+</sup>)AGQSPVLR(C13<sup>+</sup>)-COOH**  
**precursor mass: 686.3521 Da (charge: +2) protein: P17225 (172-184)**  
**score (threshold): 54.0 (30.0)**  
**instrument: Waters Q-TOF Premier**

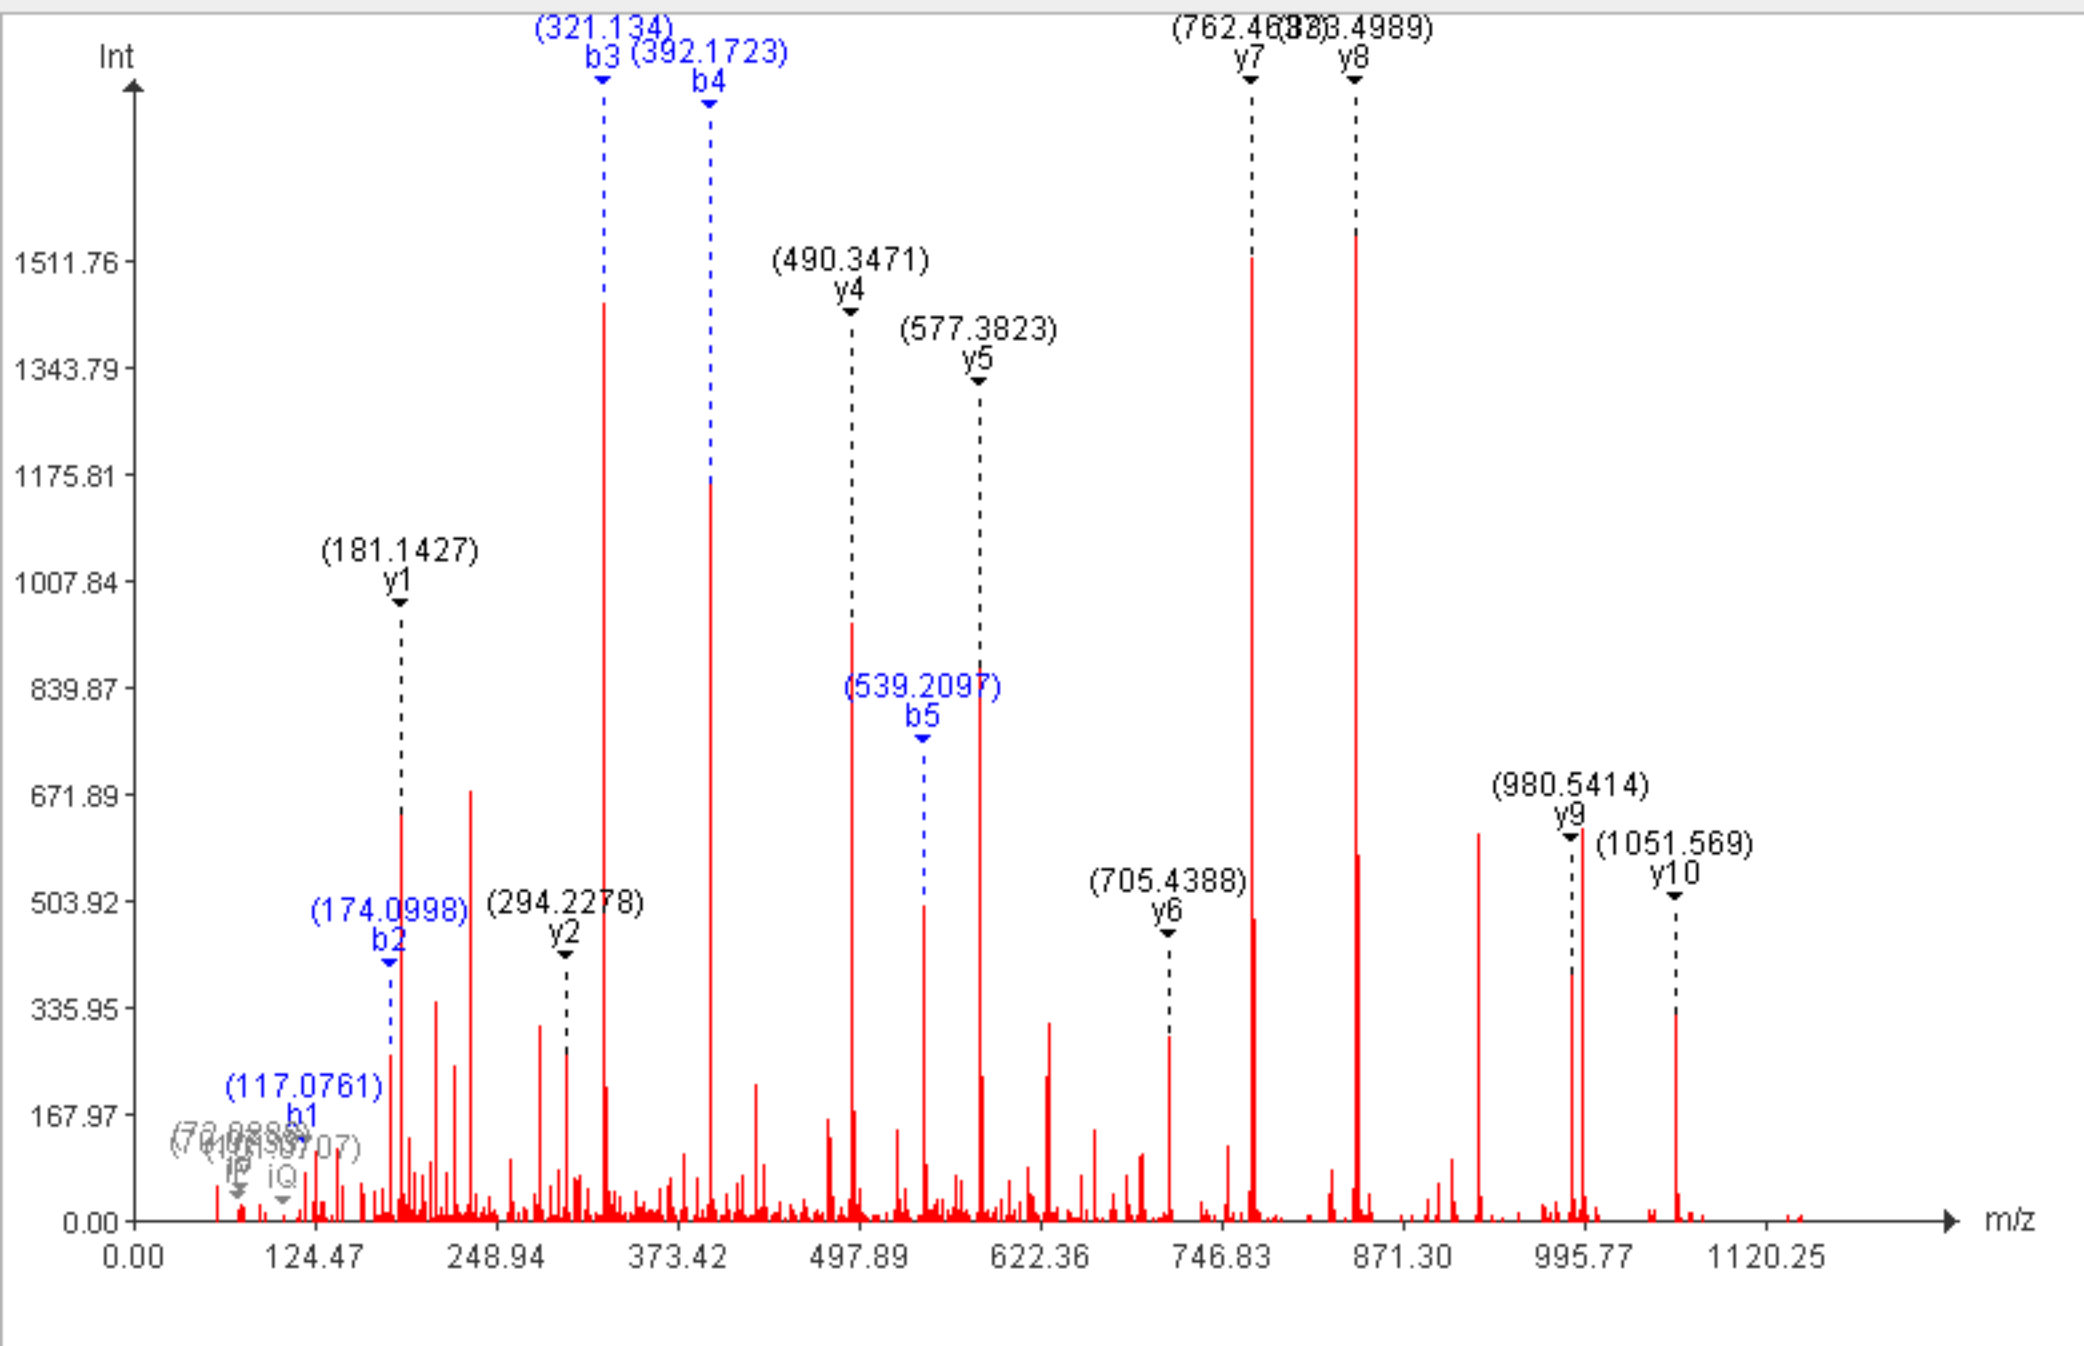

AcD3-GQVITIGN(Dam)ER-COOH

precursor mass: 566.8011 Da (charge: +2) protein: P62737 (247-256)

score (threshold): 68.0 (31.0)

instrument: Waters Q-TOF Premier

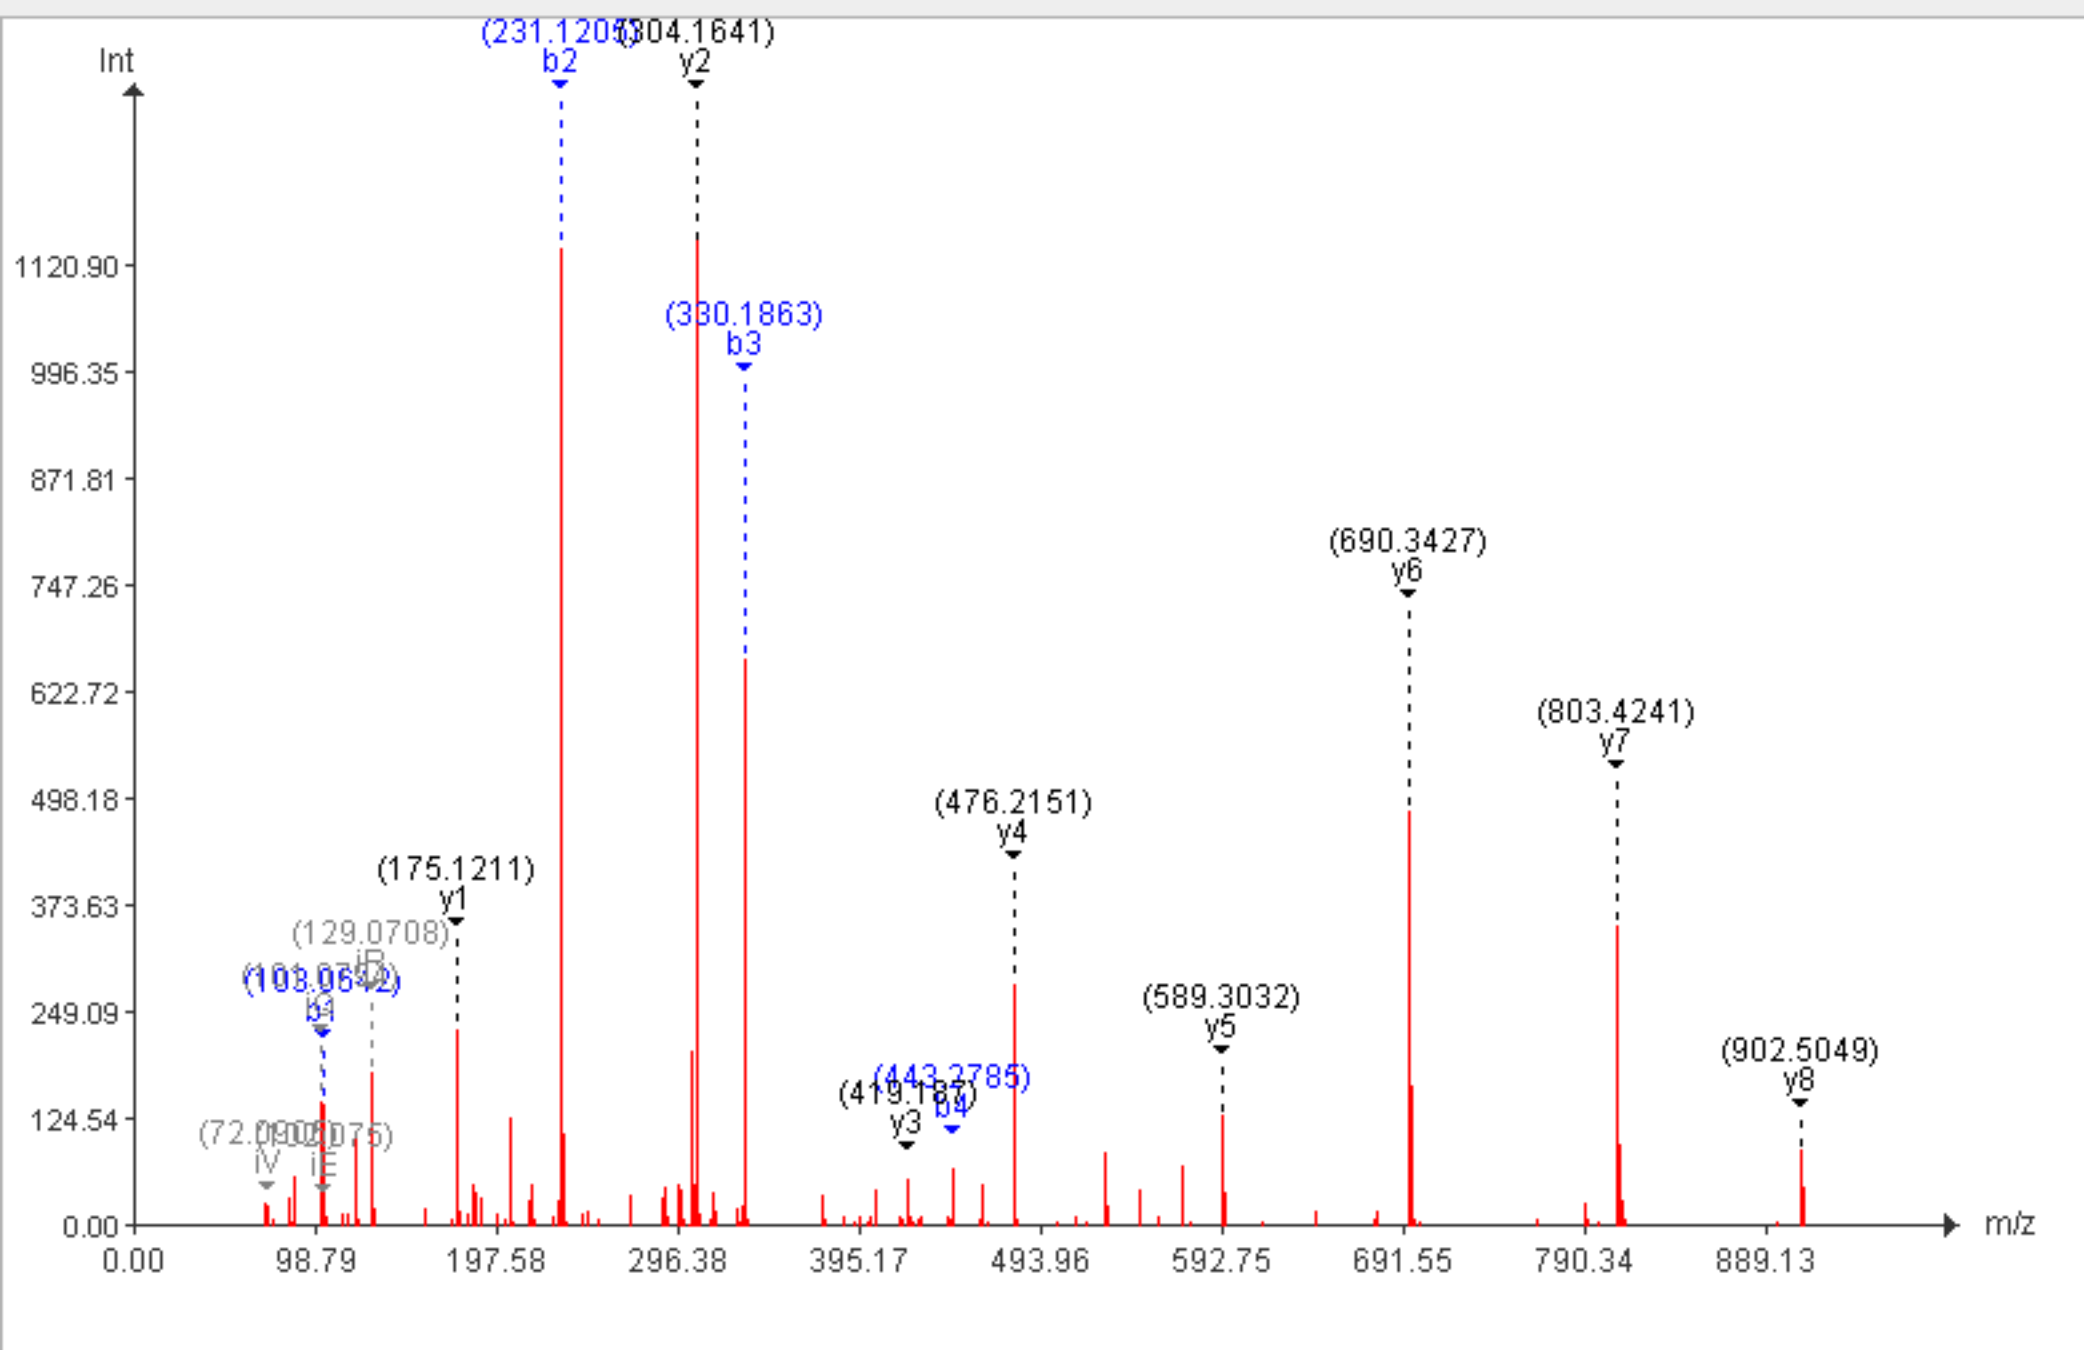

**AcD3-GVM(Mox\*)N(Dam)GEYYQESNGPTDSYAAISEVDR(C13\*)-COOH**

**precursor mass: 974.0873 Da (charge: +3) protein: O08585 (76-101)**

**score (threshold): 69.0 (23.0)**

**instrument: Waters Q-TOF Premier**

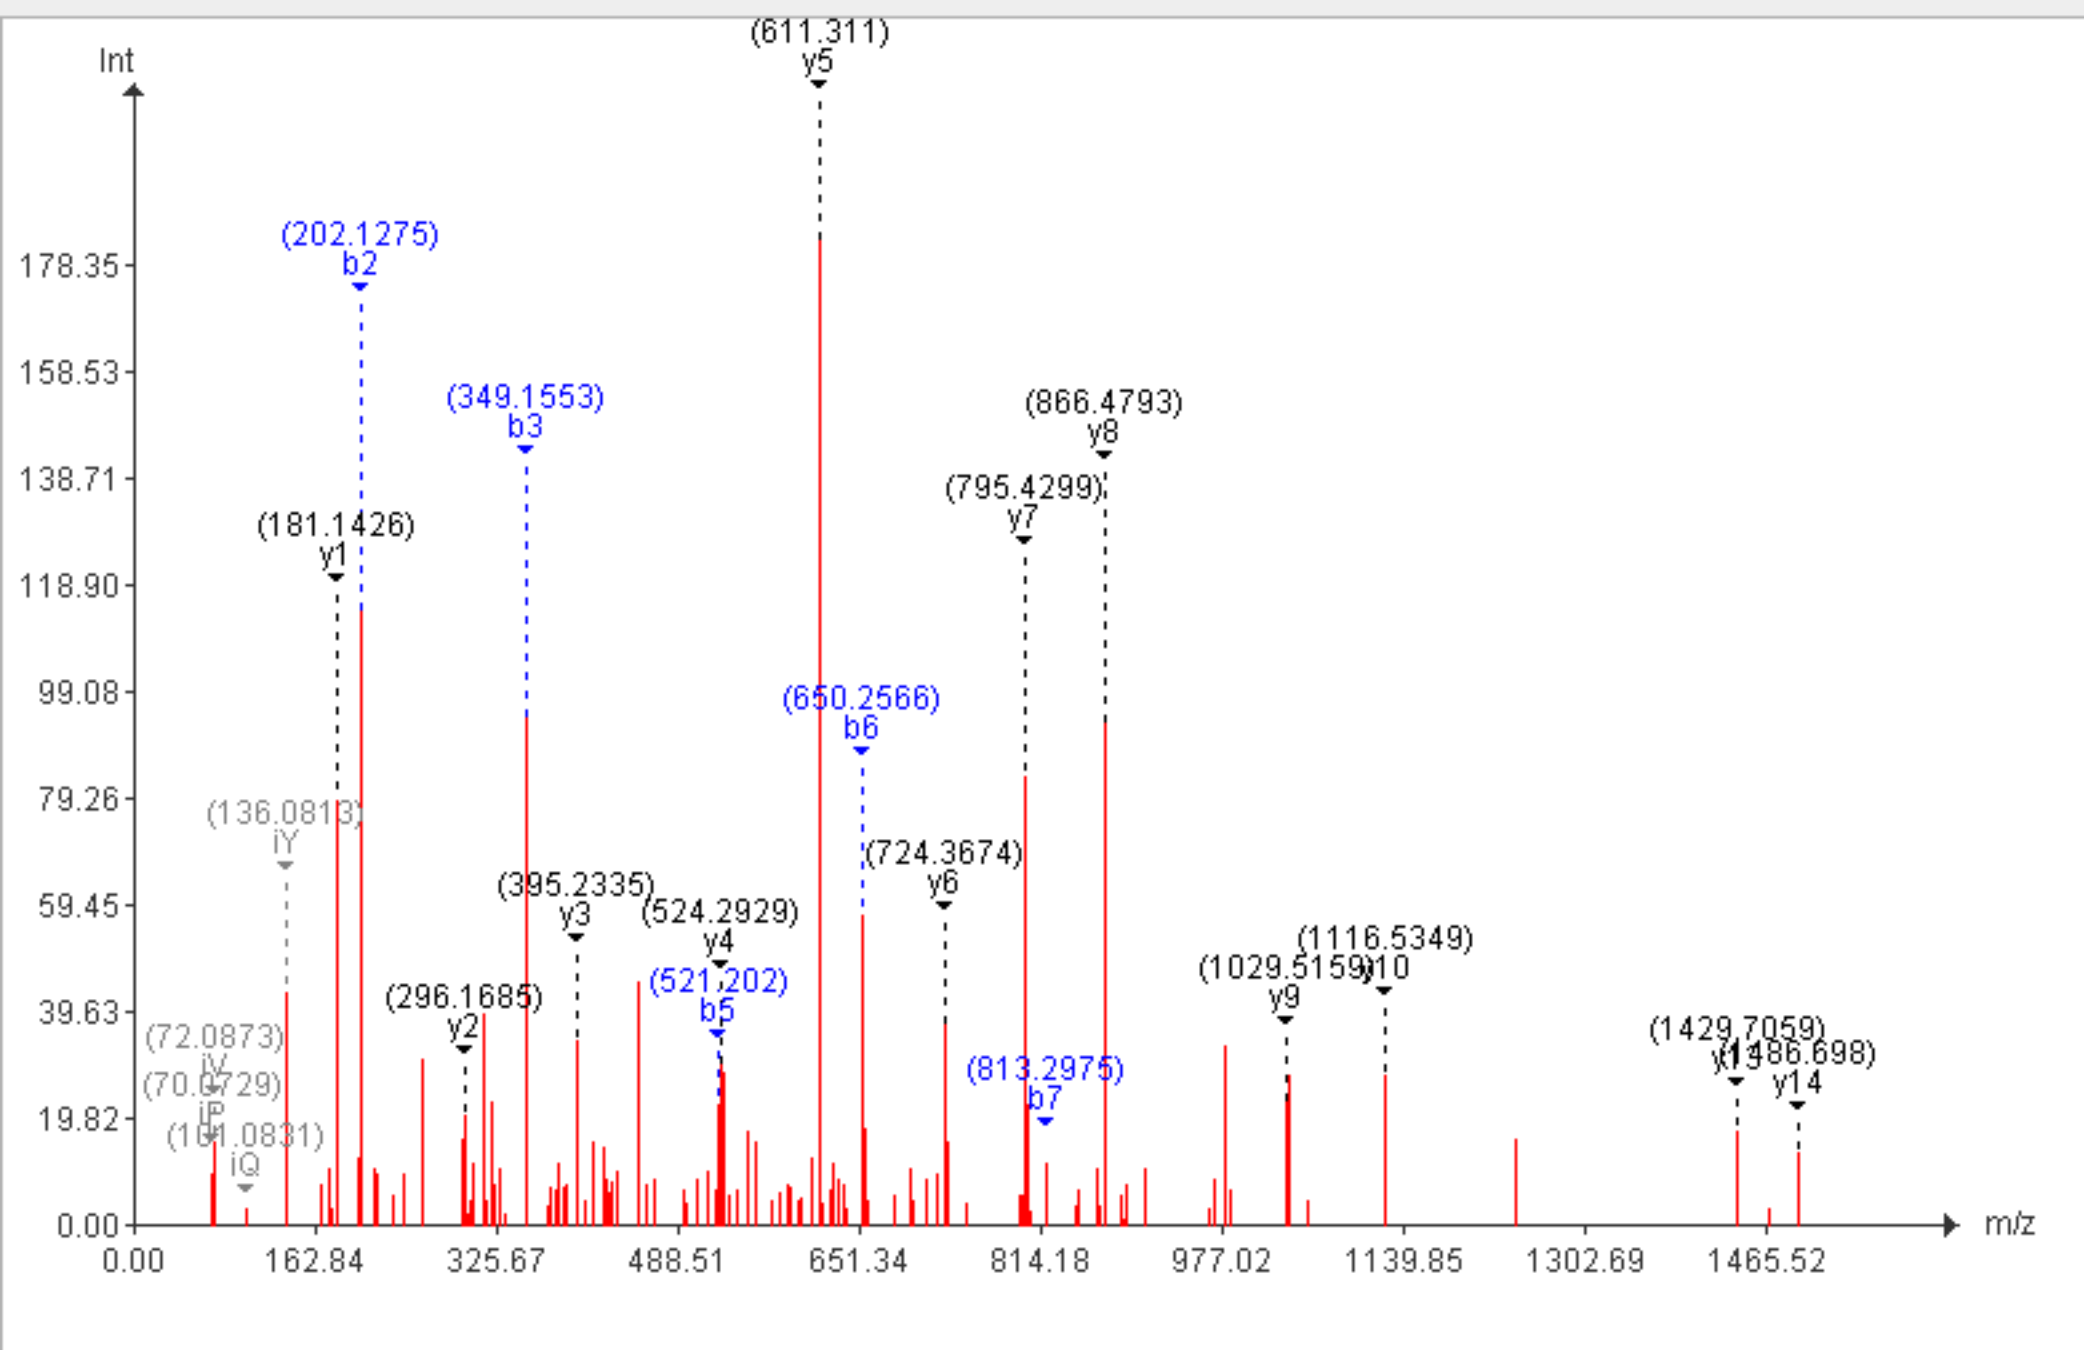

**AcD3-AM(Mox\*)VK(AcD3K\*)SVER-COOH**  
**precursor mass: 513.2813 Da (charge: +2) protein: Q9CR98 (15-22)**  
**score (threshold): 58.0 (31.0)**  
**instrument: Waters Q-TOF Premier**

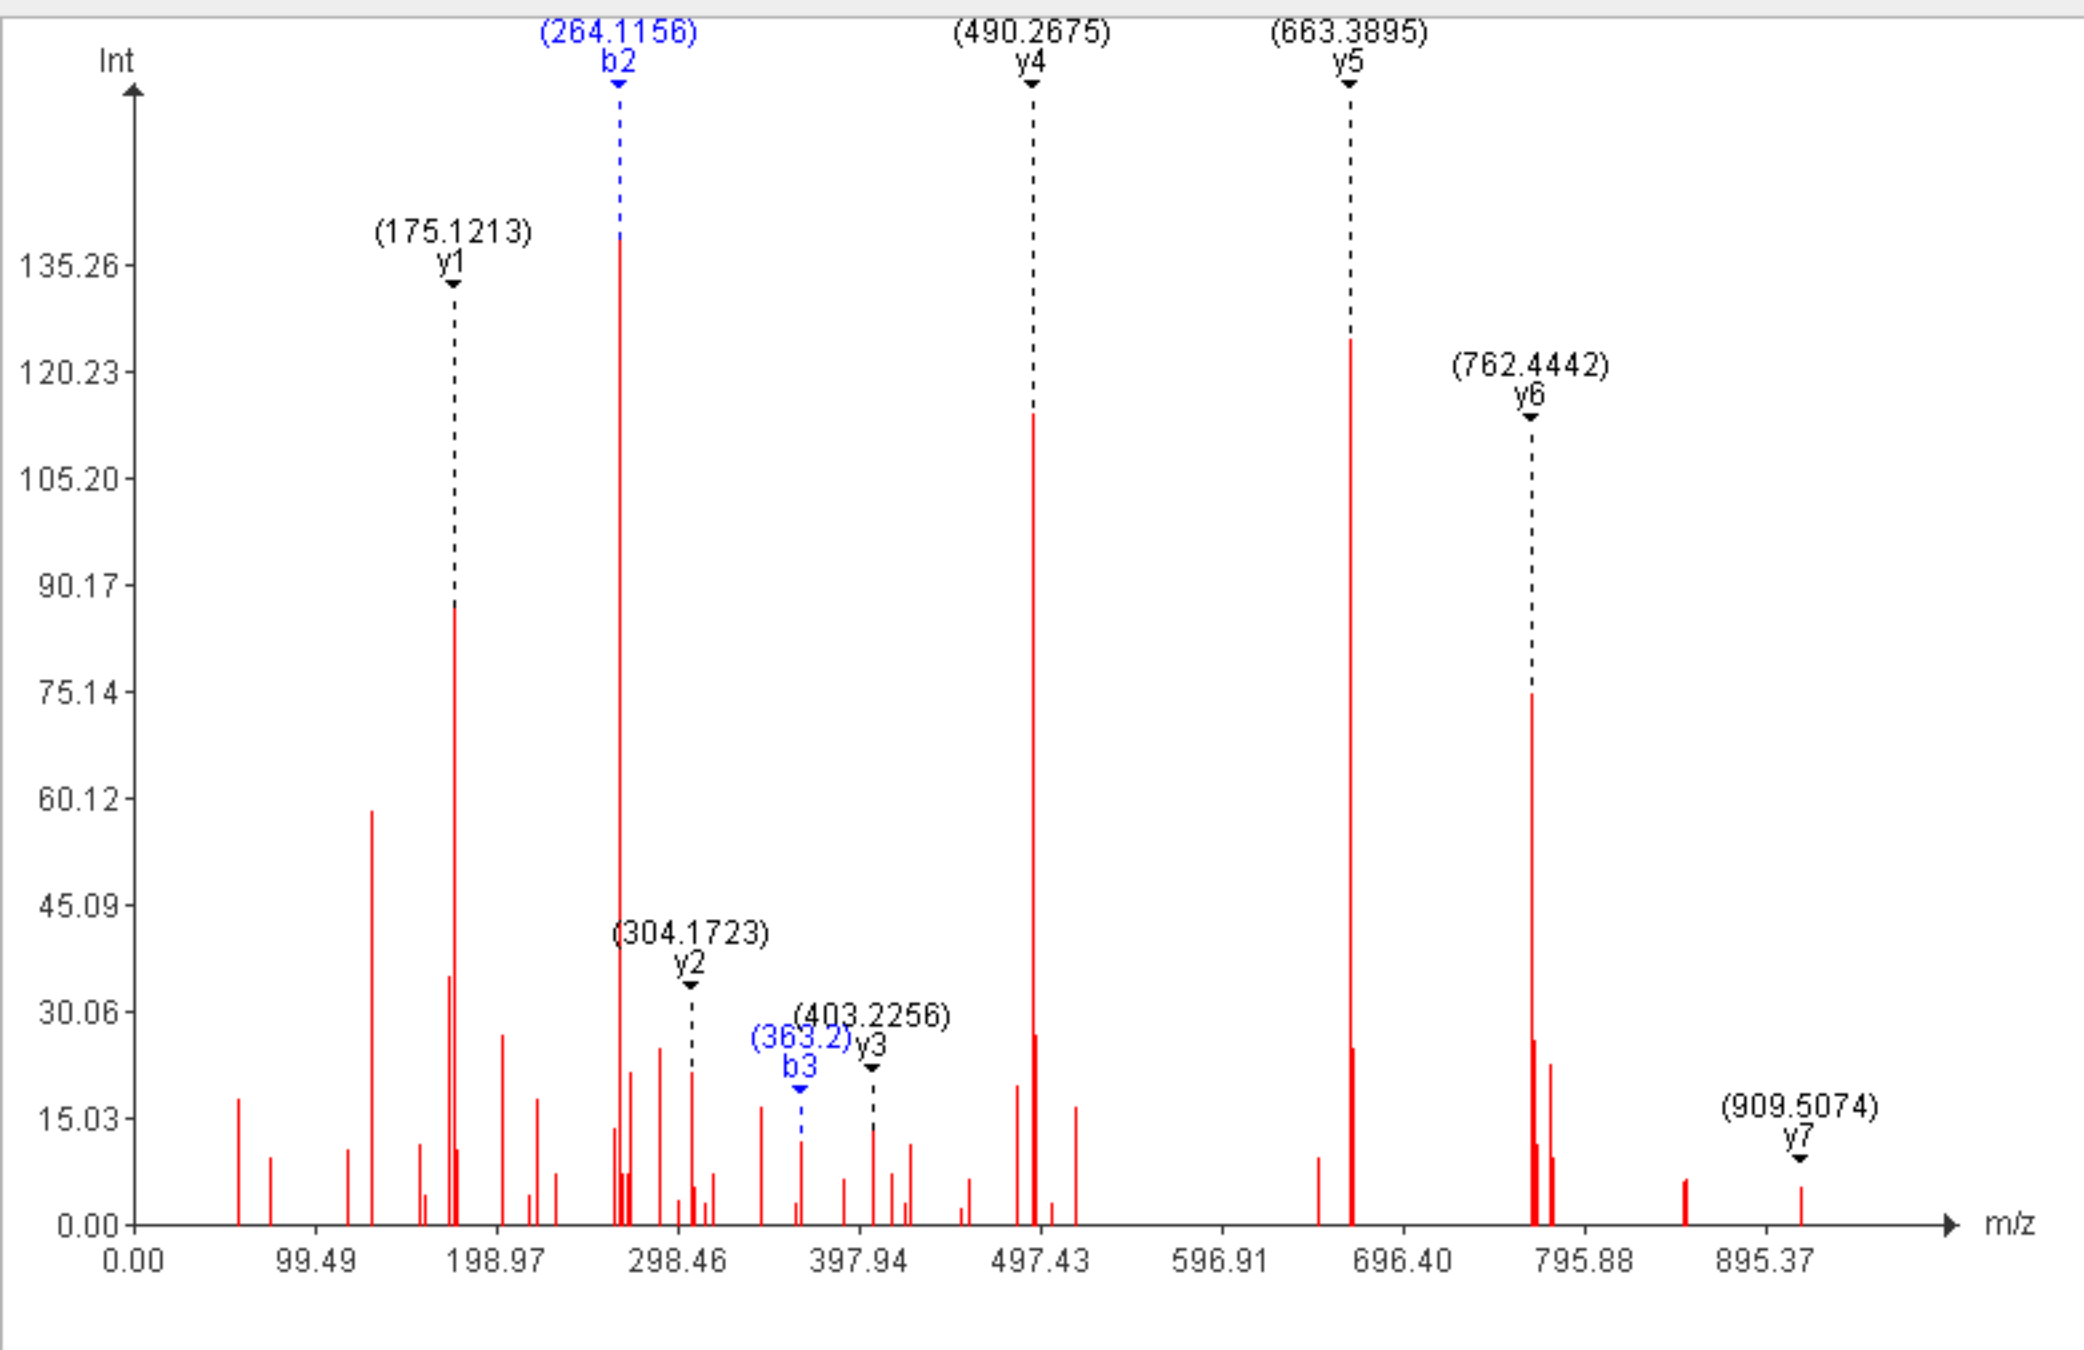

**AcD3-GTVEEDLGK(AcD3K\*)SR-COOH**  
**precursor mass: 640.8316 Da (charge: +2) protein: P08113 (29-39)**  
**score (threshold): 61.0 (31.0)**  
**instrument: Waters Q-TOF Premier**

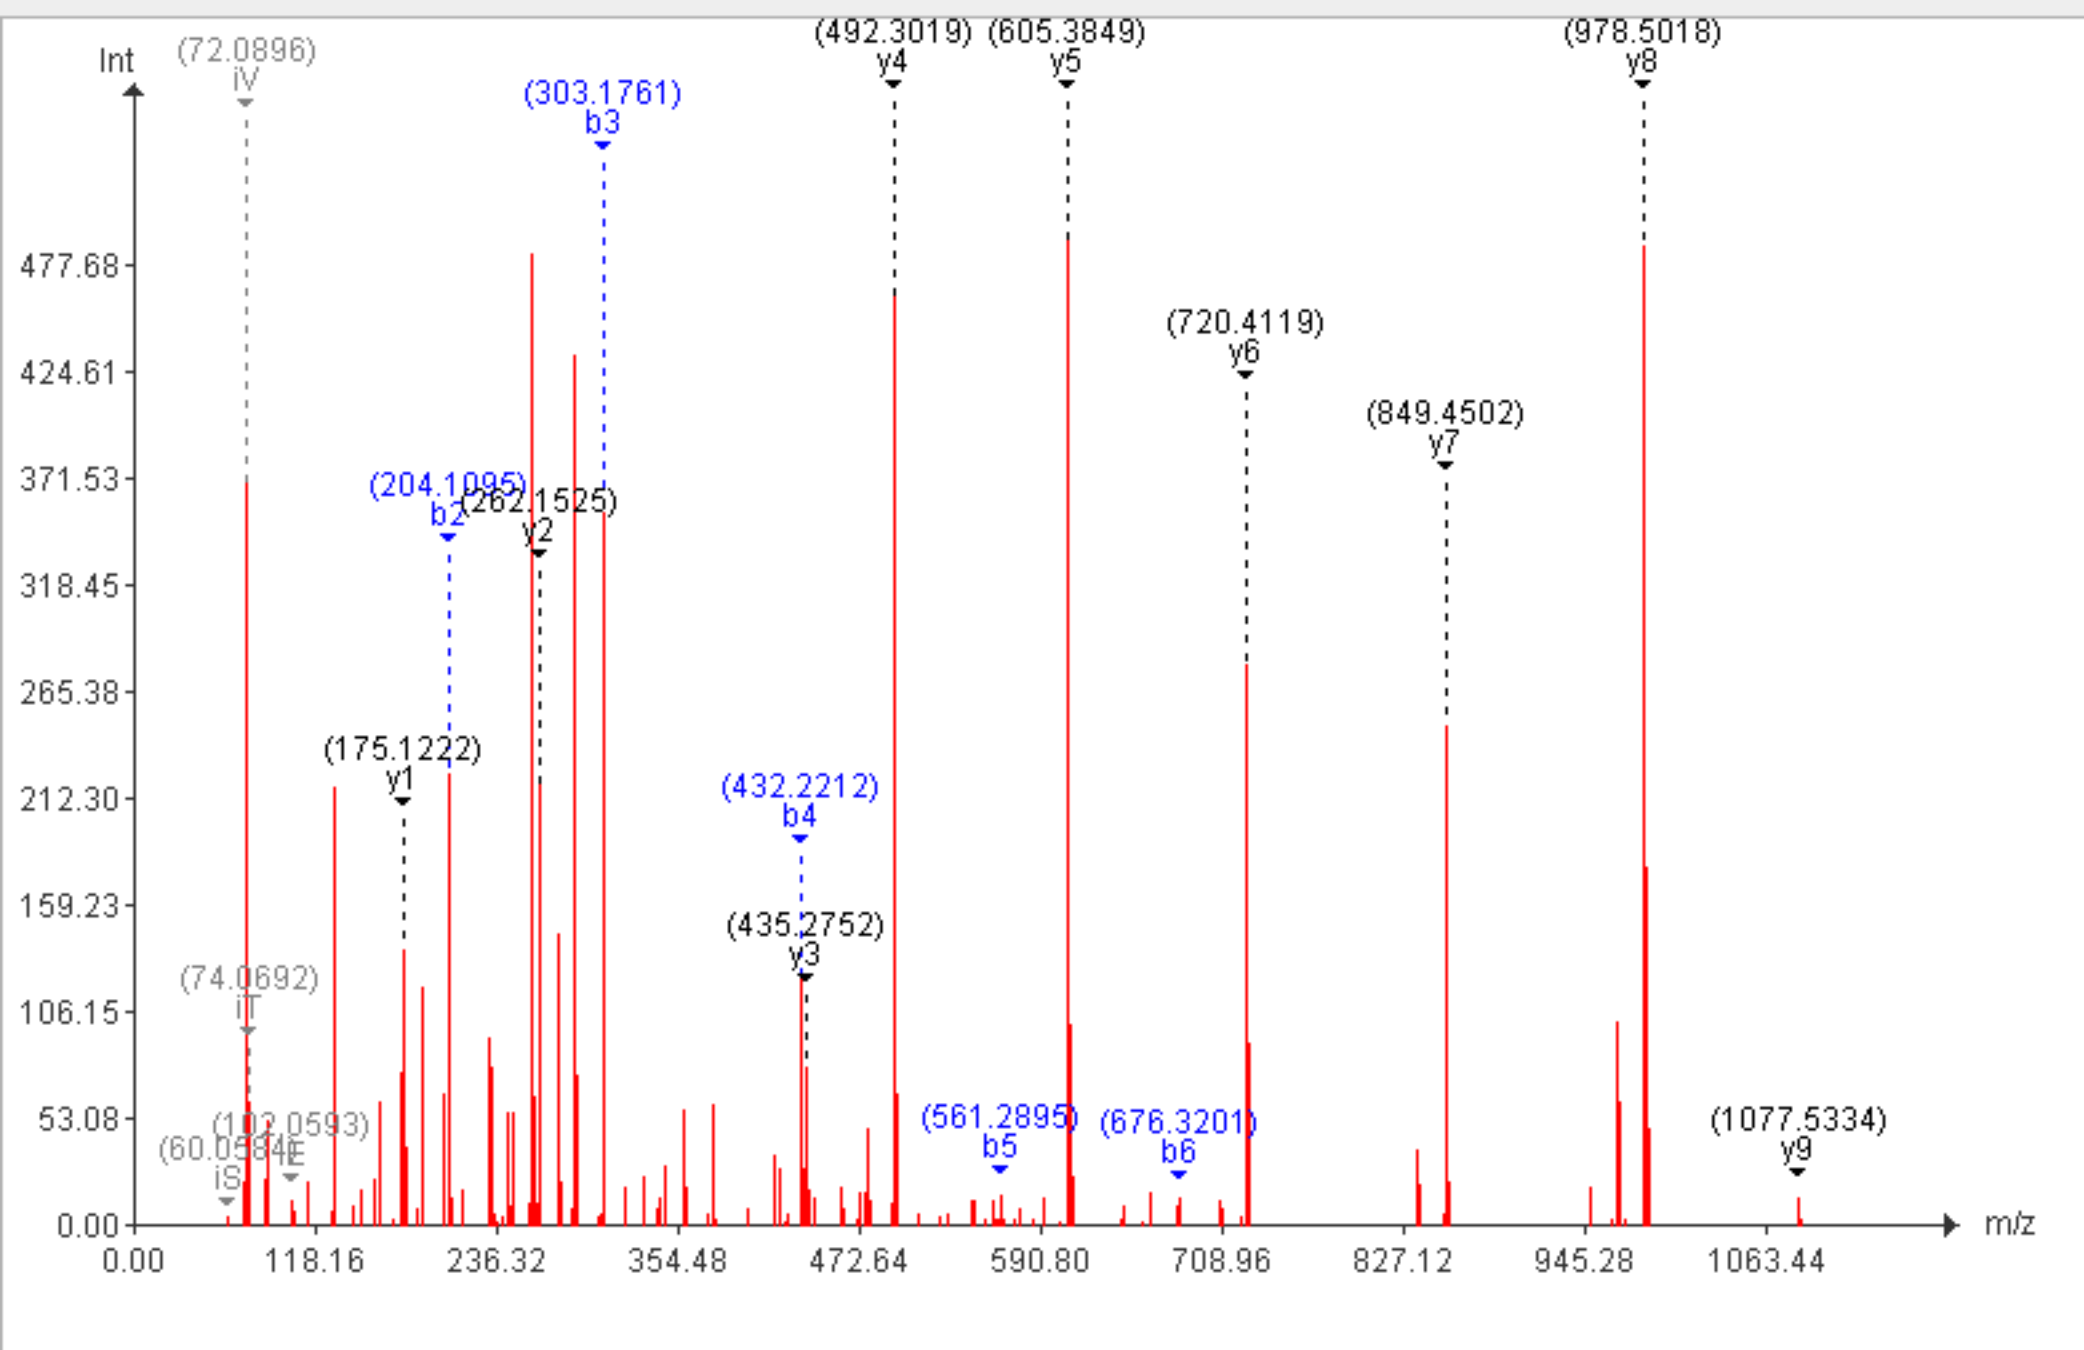



**AcD3-N(Dam)GSGM(Mox\*)C(Cmm\*)K(AcD3K\*)AGFAGDDAPR-COOH**

**precursor mass: 909.3747 Da (charge: +2) protein: P60710 (12-28)**

**score (threshold): 84.0 (29.0)**

**instrument: Waters Q-TOF Premier**

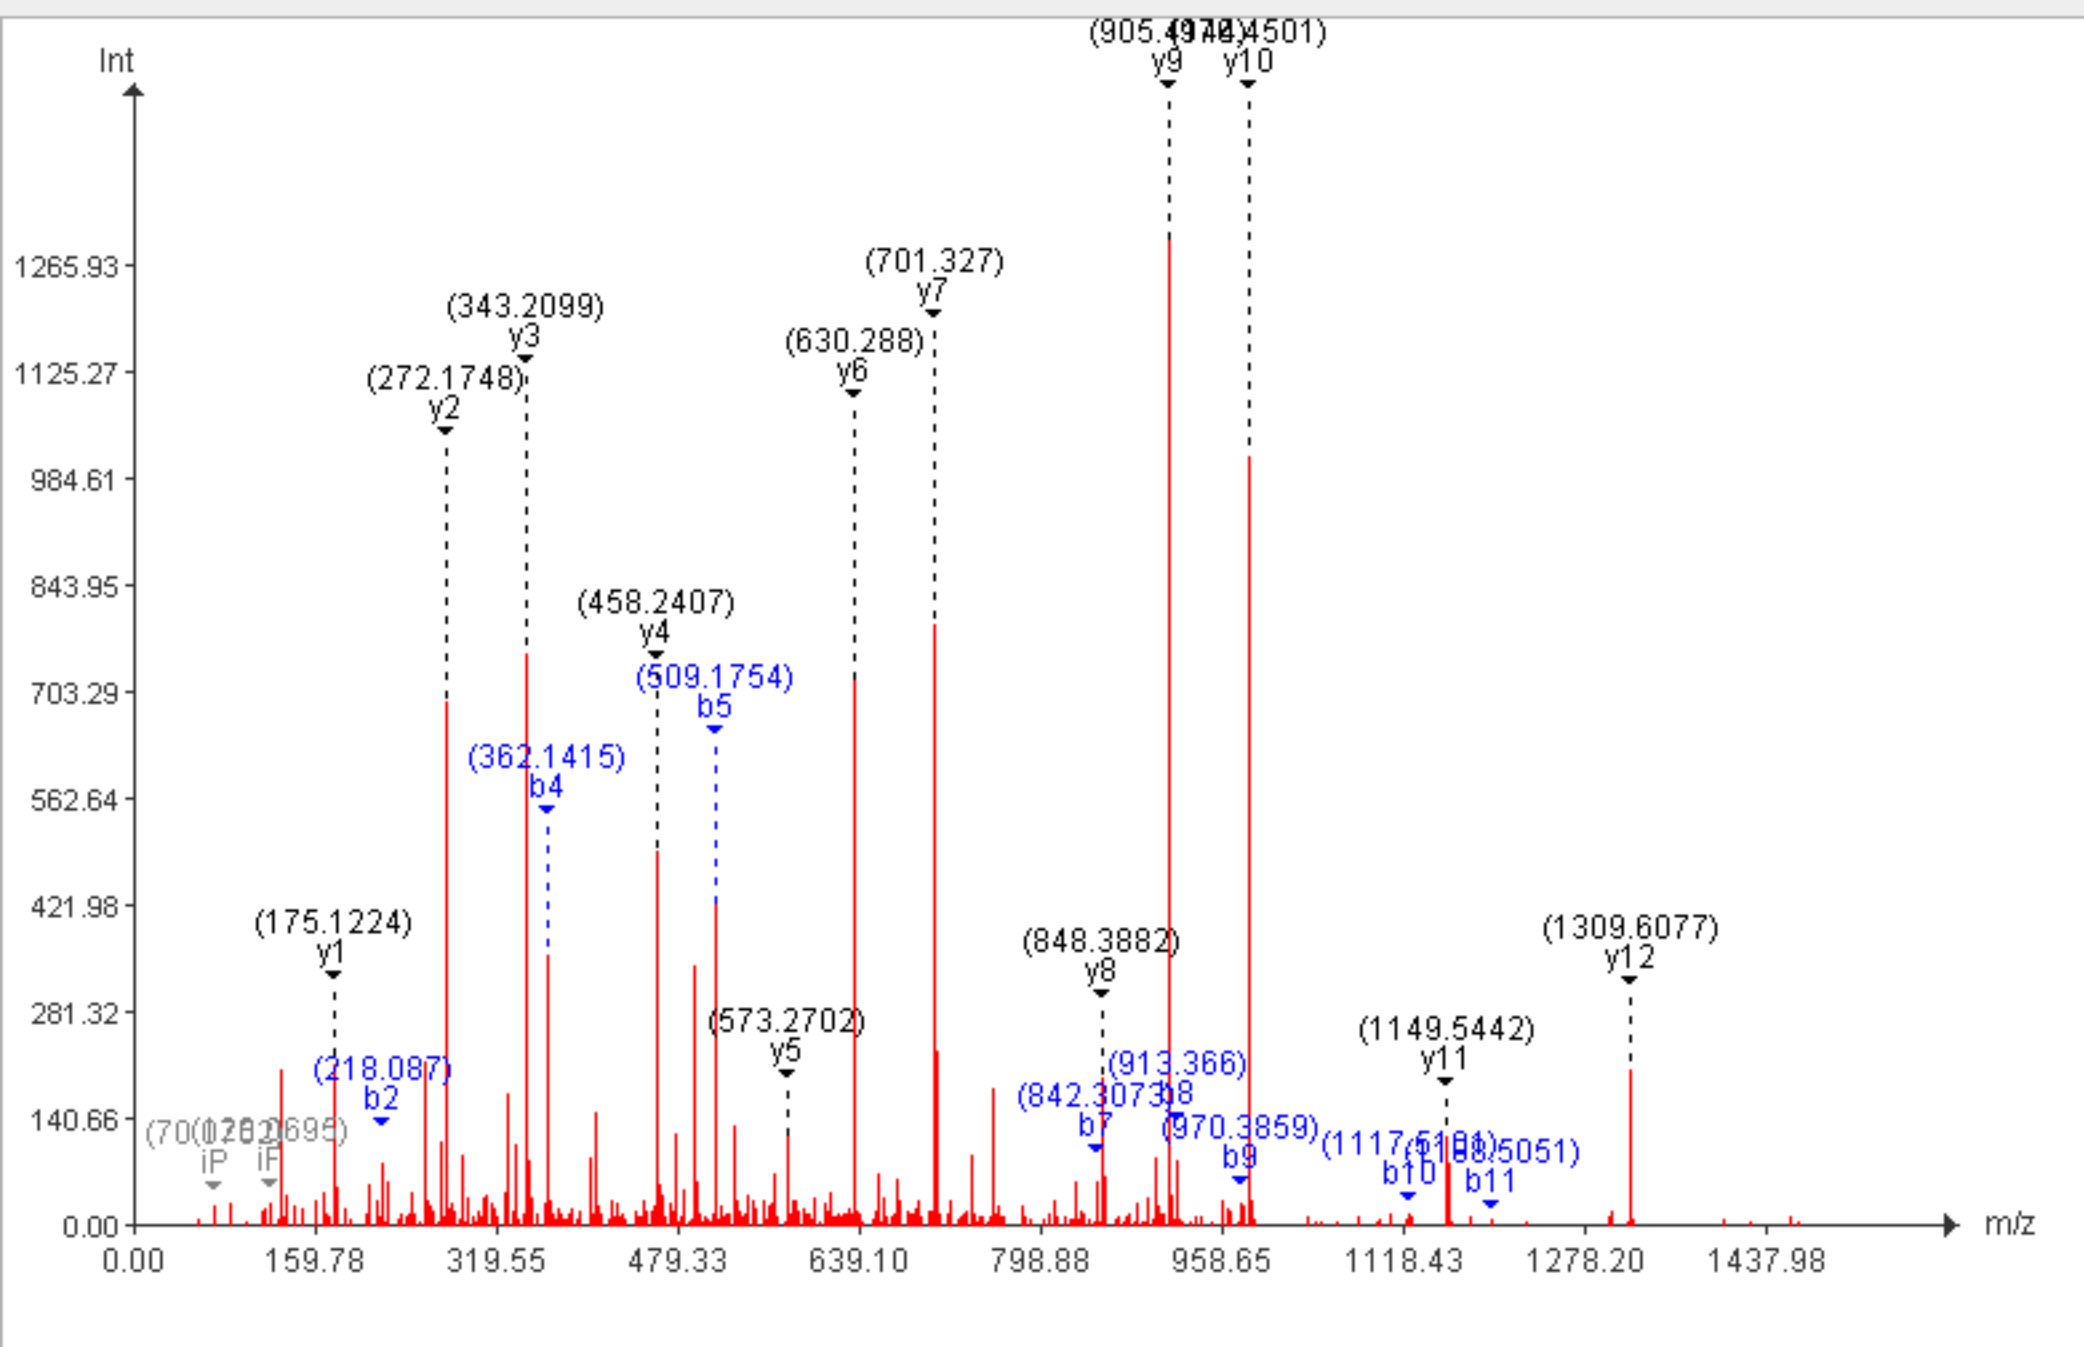

**AcD3-AEAAM(Mox\*)DISEGR(C13\*)-COOH**  
**precursor mass: 608.7858 Da (charge: +2) protein: P56399 (768-778)**  
**score (threshold): 60.0 (30.0)**  
**instrument: Waters Q-TOF Premier**

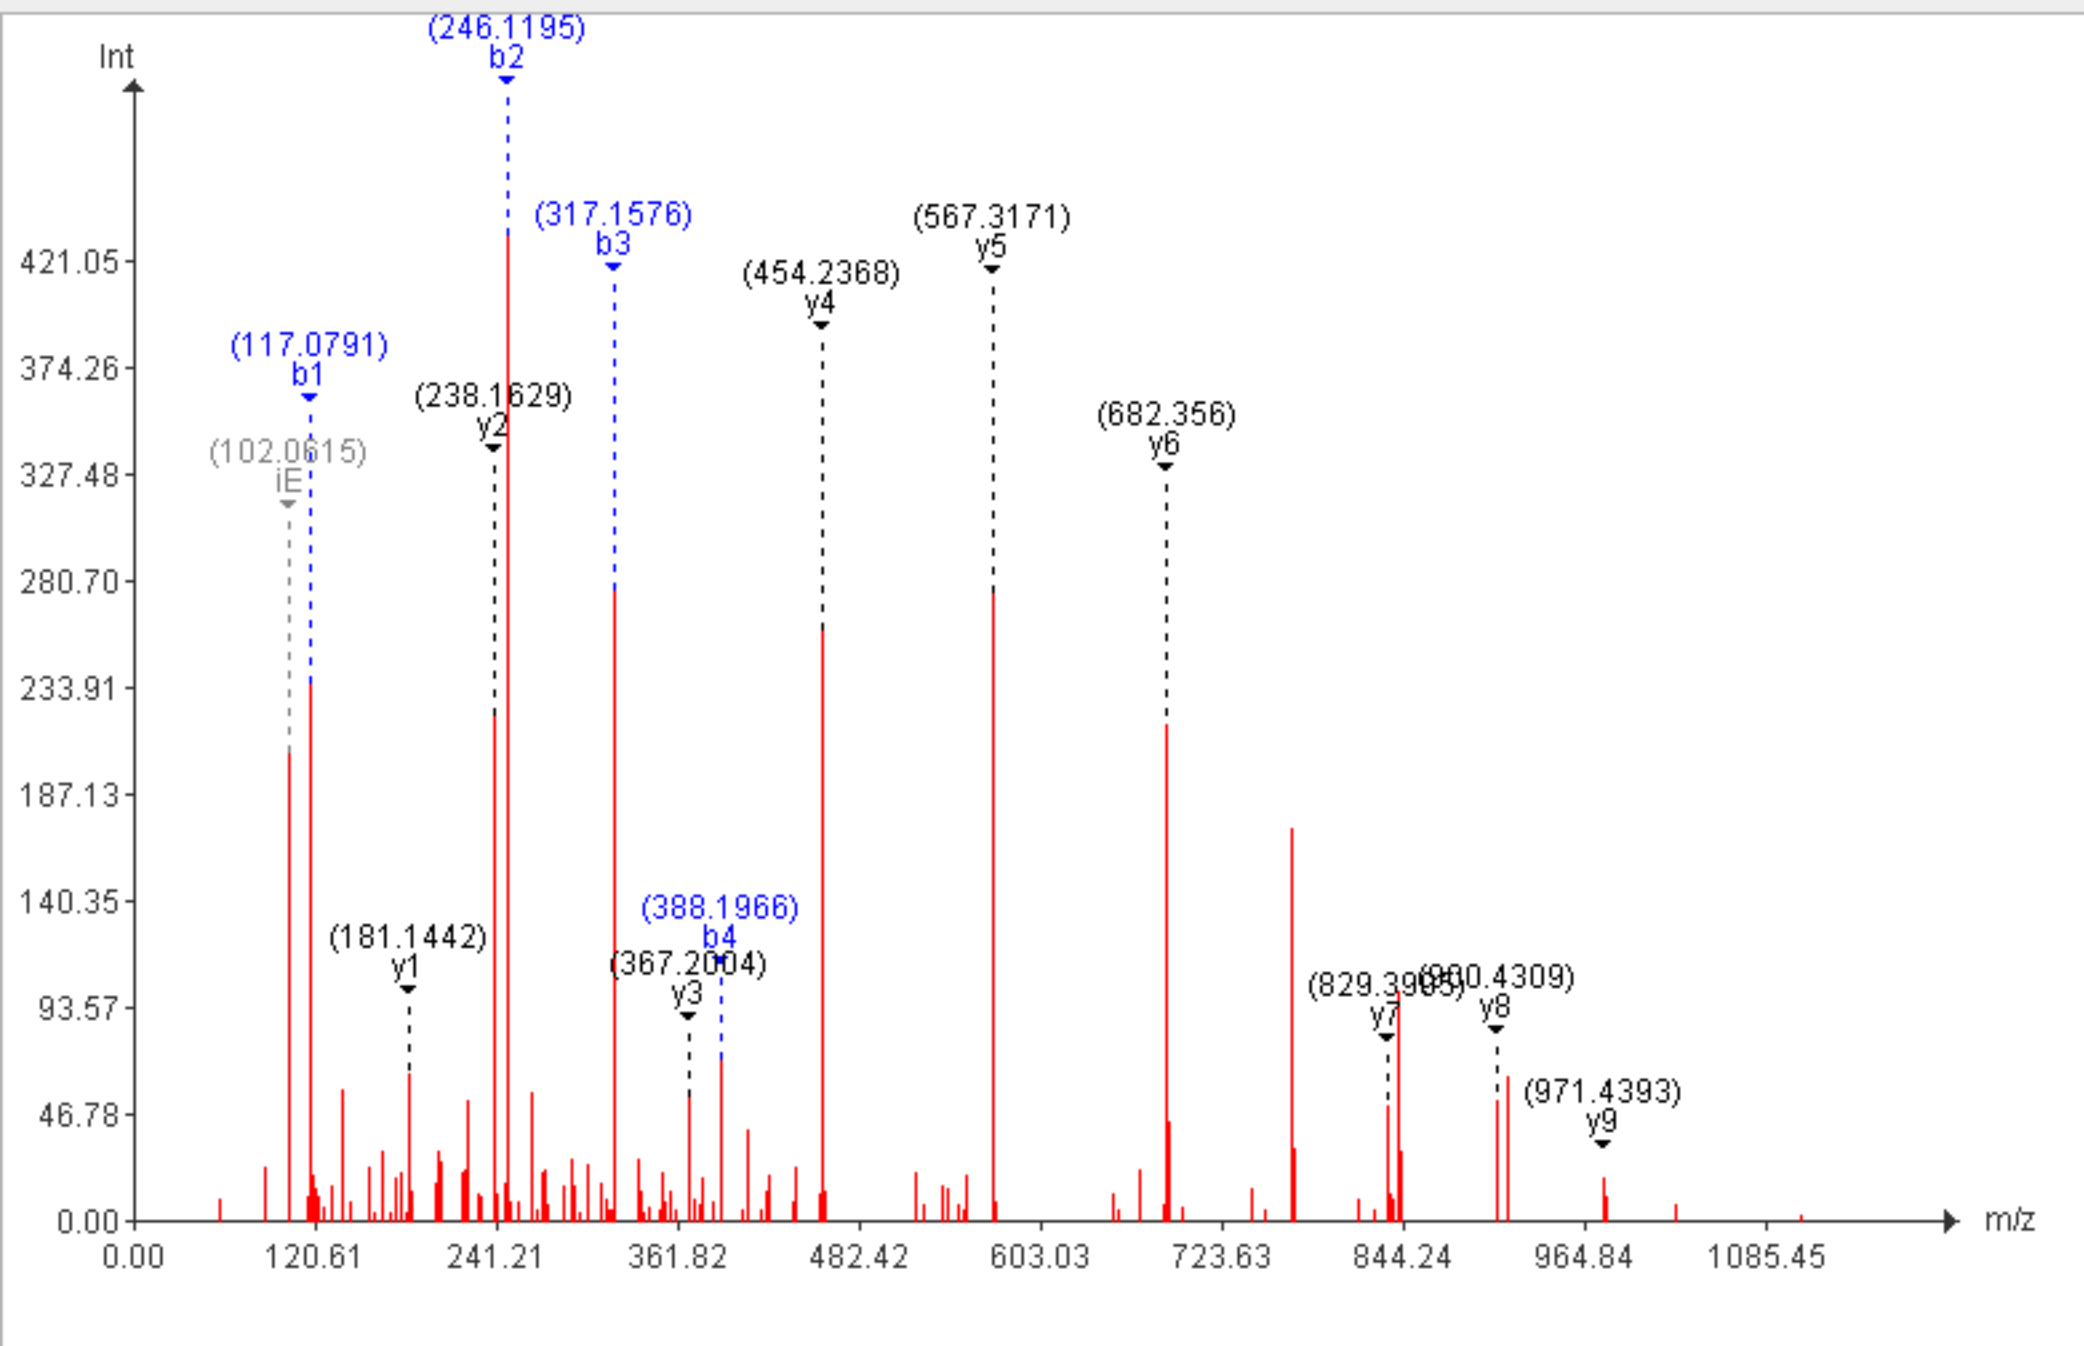

**AcD3-AEAAM(Mox\*)DISEGR-COOH**

**precursor mass: 605.7739 Da (charge: +2) protein: P56399 (768-778)**

**score (threshold): 60.0 (31.0)**

**instrument: Waters Q-TOF Premier**

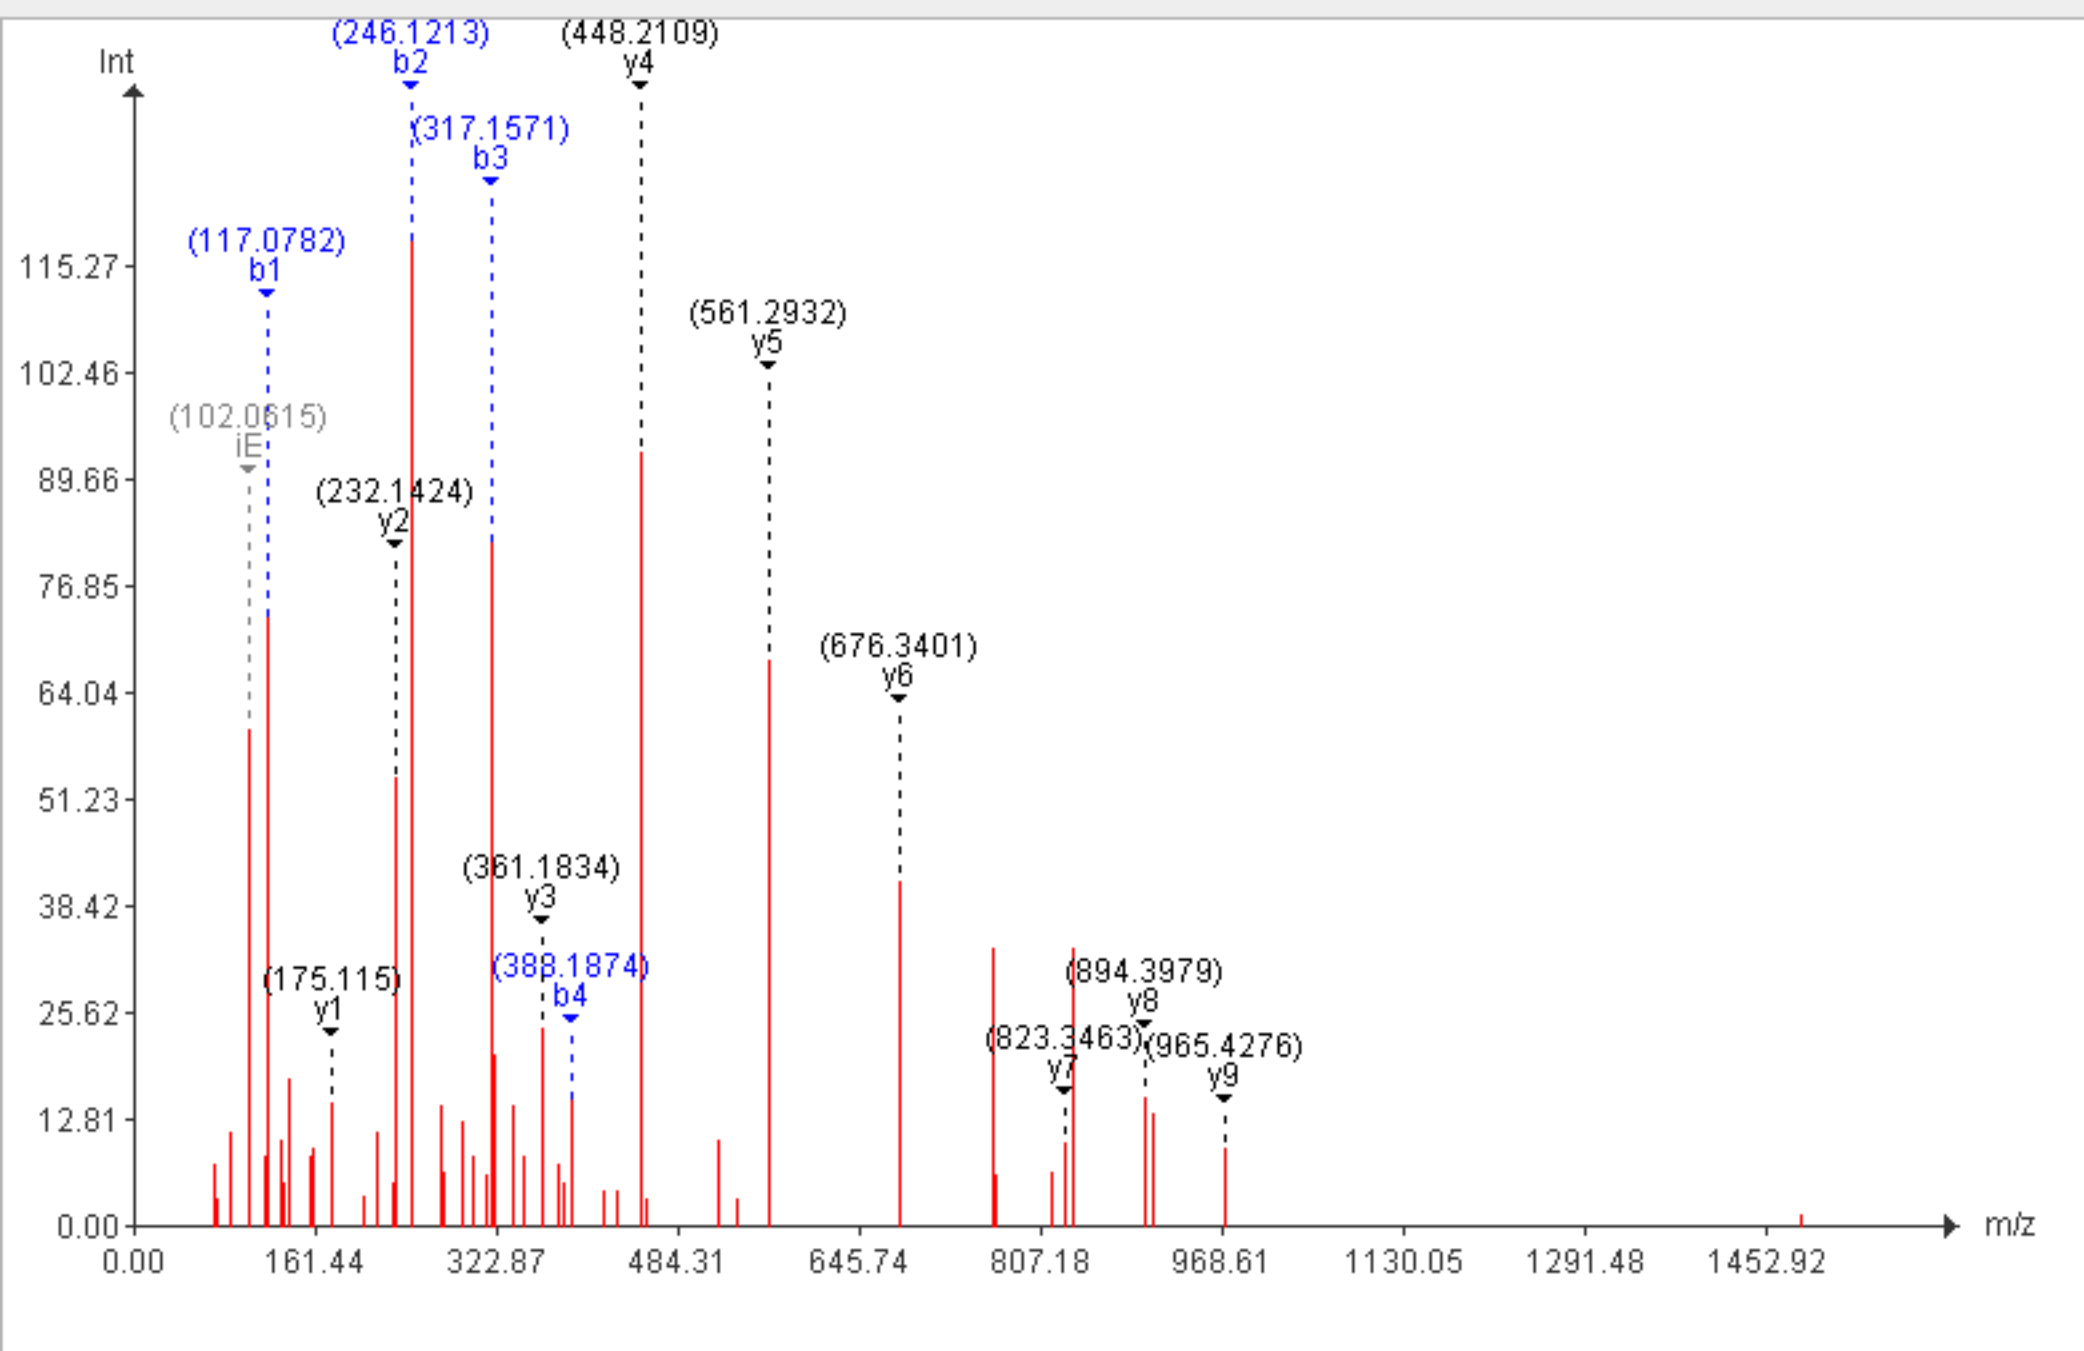

**AcD3-STAAQQLR(C13\*)-COOH**

**precursor mass: 527.7872 Da (charge: +2) protein: Q8VDD5 (1154-1162)**

**score (threshold): 55.0 (31.0)**

**instrument: Waters Q-TOF Premier**

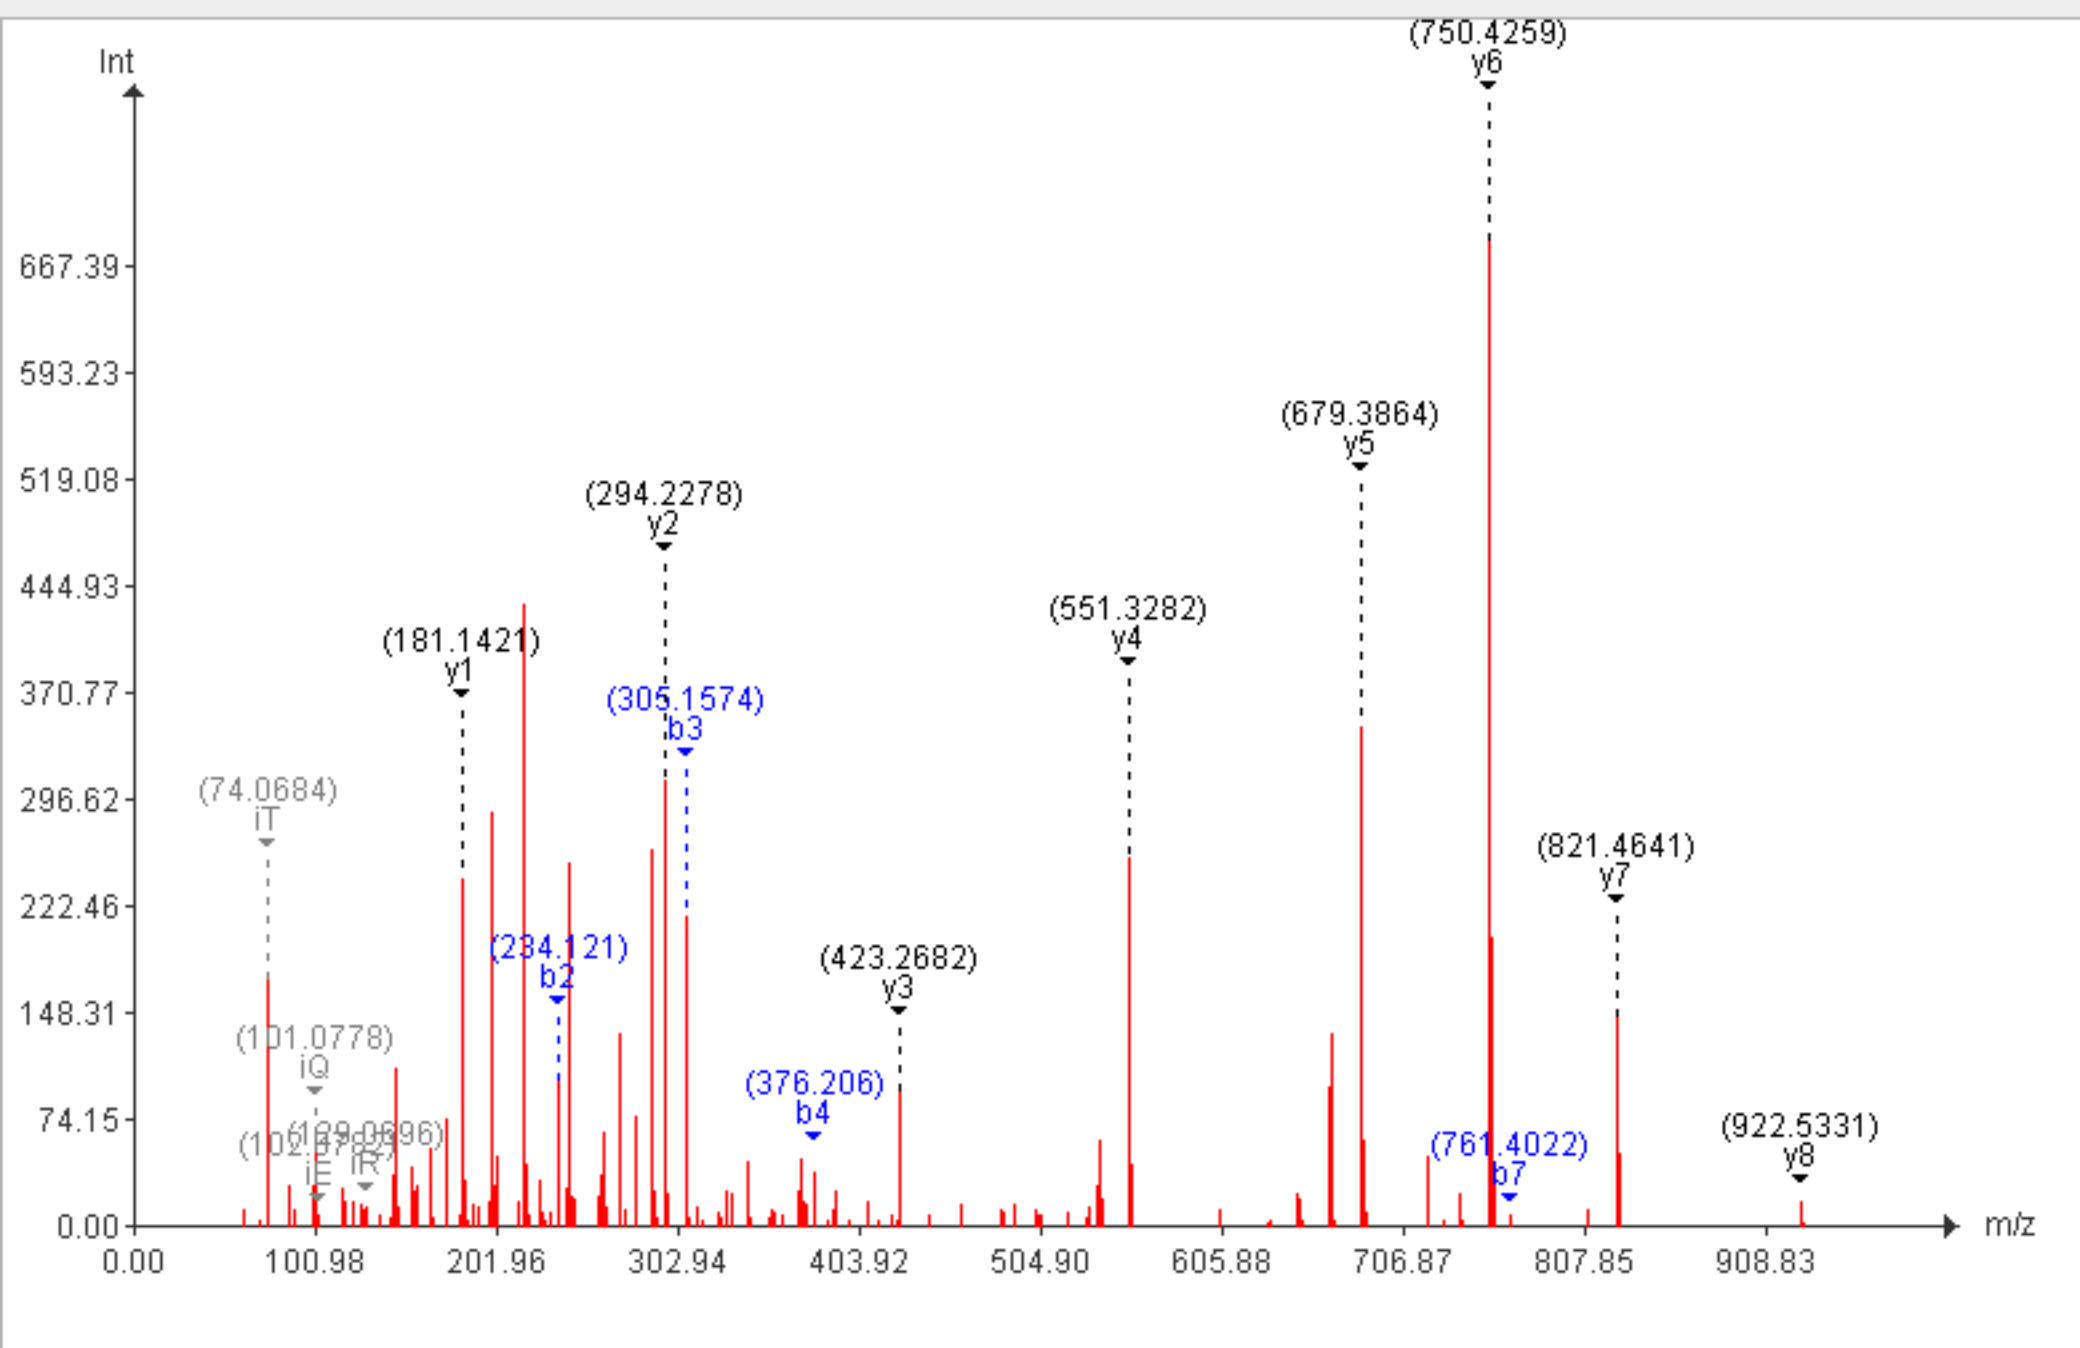

**AcD3-AAEDYAK(AcD3K\*)ER-COOH**

**precursor mass: 571.7811 Da (charge: +2) protein: Q922B2 (20-28)**

**score (threshold): 69.0 (30.0)**

**instrument: Waters Q-TOF Premier**

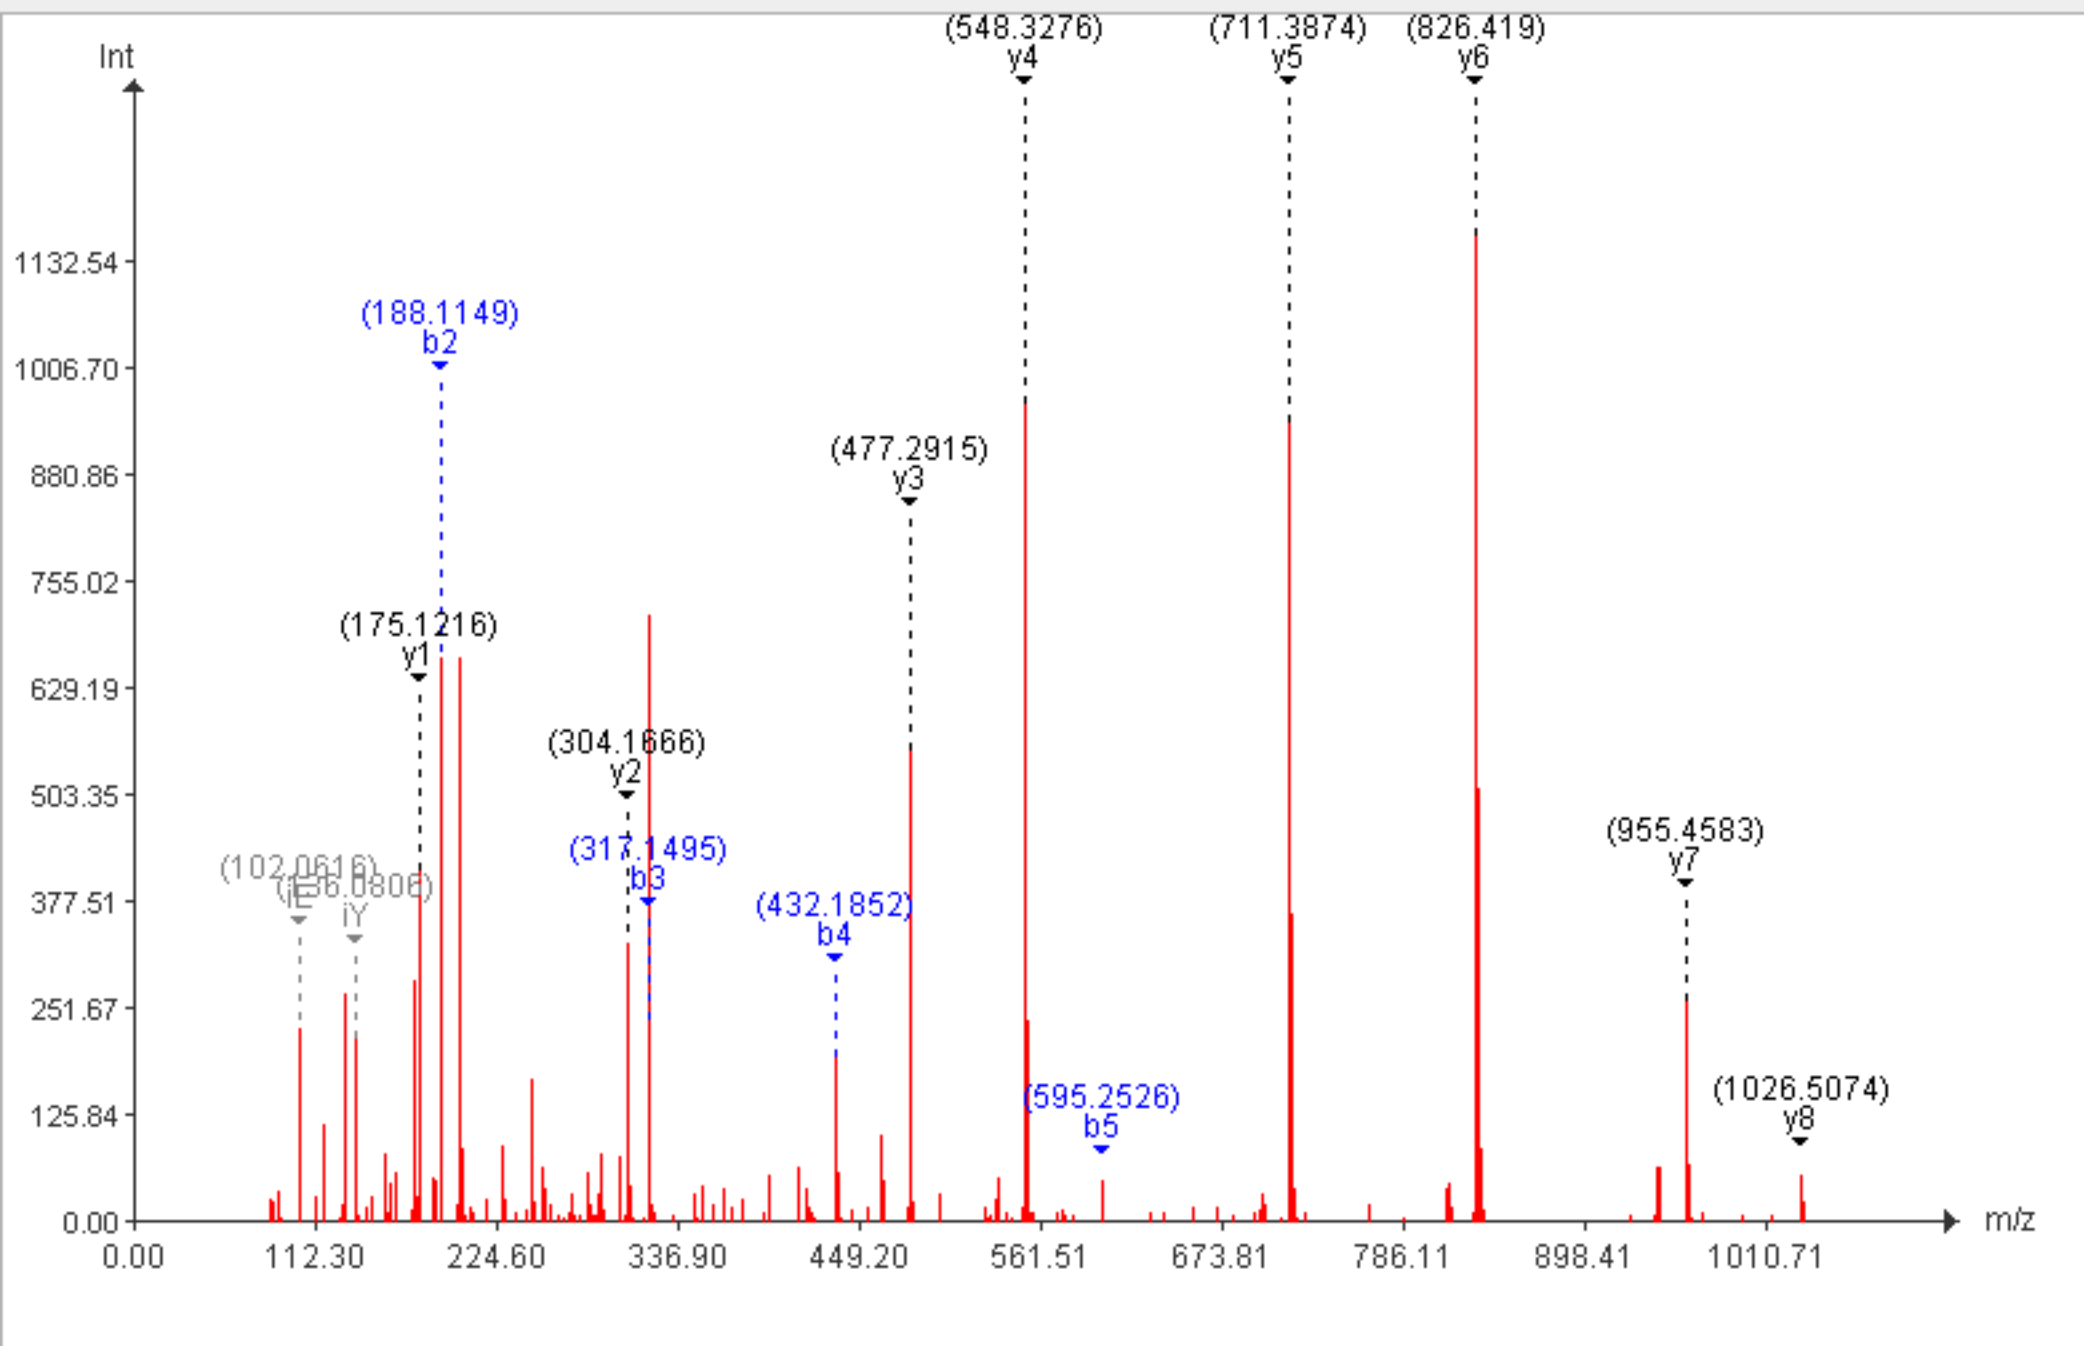

Supplement: M900310-MCP200_1.pdf [file M900310-MCP200_1.pdf]
